# Supplementary material for: High-Resolution Comparative Genomic Hybridization of Inflammatory Breast Cancer and Identification of Candidate Genes
Source: PLoS One. 2011 Feb 9;6(2):e16950. doi: 10.1371/journal.pone.0016950 (PMC3037286; doi:10.1371/journal.pone.0016950)
Supplement: Table S1 — Description of the public nIBC data sets. (XLS) [file pone.0016950.s005.xls]

## Sheet: Table S1
	Table S1: Description of the public nIBC data sets
	Reference	Institution **	Source of data	N° of arrays	Technological platform	N° of probe sets	Available histoclinical prognostic data***
	van de Vijver et al., NEJM 2002	NKI	http://microarray-pubs.stanford.edu/wound_NKI/	295	Agilent	25K	age - grade - pT - pN - ER - clinical outcome
	van't Veer et al., Nature 2002	NKI	http://www.rii.com/publications/2002/vantveer.html	117	Agilent	25K	age - grade - pT - pN - ER - PR - clinical outcome
	Miller et al., PNAS 2005	KI	GEO database GSE3494	251	Affymetrix U133 A+B	2x22K	age - grade - pT - pN - ER - PR - P53 - clinical outcome
	Wang et al., Lancet 2005	JNI	GEO database GSE2034	286	Affymetrix U133 A	22K	pN - ER - clinical outcome
	Loi et al., JCO 2007	JBI	GEO database GSE6532	414	Affymetrix U133 A+B	2x22K	age - grade - pT - pN - ER - PR - clinical outcome
	UNC Microarray Database * (2005-2009)	NKI	https://genome.unc.edu/pubsup/breastGEO/	459	Agilent	35K	age - grade - pT - pN - ER - clinical outcome
	* UNC (University of Carolina) Microarray Database (2005-2009) : gathers 459 clinically annotated distinct breast cancer samples among 8 studies using the NKI microarray technology.
	Hu et al., BMC Genomics 2006 (N=162)
	Weigelt et al., Cancer Research 2005 (N=169)
	Oh et al., Journal of Clinical Oncology 2006 (N=161)
	Perreard et al., Breast Cancer Research 2006 (N=168)
	Herschkowitz et al., Genome Biol. 2007 (N=232)
	Hoadley et al., BMC Genomics 2007 (N=248)
	Parker et al., Journal of Clinical Oncoloty 2009 (N=227)
	Hu Z et al. BMC Med. 2009 (N=195)
	** Institutions: Nederlands Kanker Instituut (NKI), Karolinska Institute (KI), Josephine Nefkens Institute (JNI), JBI (Jules Bordet Institute)
	*** pT, pathological tumor size; pN, pathological axillary lymph node status
