# Supplementary material for: High-Resolution Comparative Genomic Hybridization of Inflammatory Breast Cancer and Identification of Candidate Genes
Source: PLoS One. 2011 Feb 9;6(2):e16950. doi: 10.1371/journal.pone.0016950 (PMC3037286; doi:10.1371/journal.pone.0016950)
Supplement: Table S2 — Histoclinical correlations of the three aCGH-clustered groups. (XLS) [file pone.0016950.s006.xls]

## Sheet: Table S2
Table S2: Histoclinical correlations of the three aCGH-clustered groups.
Characteristics (N)	I	II	III	p
	N=39 (28%)	N=41 (30%)	N=57 (42%)
Median age (137)	52 (28 - 75)	54 (30 - 84)	53 (24 - 79)	0.2
Type (137)				0.261617
IBC	15(38%)	9(22%)	17(30%)
NIBC	24(62%)	32(78%)	40(70%)
Grade (132)				0.0105299
1	3(8%)	6(15%)	11(20%)
2	8(21%)	15(38%)	26(47%)
3	27(71%)	18(46%)	18(33%)
IHC ER status (137)				9.9999e-06
negative	31(79%)	15(37%)	8(14%)
positive	8(21%)	26(63%)	49(86%)
IHC ERBB2 status (122)				0.00121999
negative	22(61%)	31(91%)	47(90%)
positive	14(39%)	3(9%)	5(10%)
IHC P53 status (112)				0.0215998
negative	12(39%)	25(69%)	30(67%)
positive	19(61%)	11(31%)	15(33%)
Molecular subtype (137)				3.691e-08
Basal	20 (51%)	8 (20%)	4 (7%)
ERBB2	7 (18%)	5 (12%)	3 (5%)
LuminalA	4 (10%)	18 (44%)	27 (47%)
LuminalB	2 (5%)	3 (7%)	18 (32%)
Normal	6 (15%)	7 (17%)	5 (9%)
Genomic pattern (137)				0.0346497
Complex sawtooth	17(44%)	8(20%)	11(19%)
Complex firestorm	16(41%)	17(41%)	29(51%)
Simplex	6(15%)	16(39%)	17(30%)
5-year MFS (133)	0.65	0.63	0.74	0.638
5-year OS (126)	0.63	0.7	0.87	0.107
