# Supplementary material for: High-Resolution Comparative Genomic Hybridization of Inflammatory Breast Cancer and Identification of Candidate Genes
Source: PLoS One. 2011 Feb 9;6(2):e16950. doi: 10.1371/journal.pone.0016950 (PMC3037286; doi:10.1371/journal.pone.0016950)
Supplement: Table S3 — Regions with CNAs in IBCs. (XLS) [file pone.0016950.s007.xls]

## Sheet: Table S3
Table S3: Regions with CNAs in IBCs
ChrName	First Cytboband Region	Last Cytboband Region	Start Region	Stop Region	N° of probes	Median GISTIC score	N° of genes	Genes *	CNA status	% Gain in IBCs	% Loss in IBCs
1	1p36.33	1p33	792533	48157910	4667	-0.0515	691	AB046775,ADC,ADPRHL2,AJ242730,AK001622,AK056830,AK074957,AK091566,AK123355,AK125741,AK2,AKR1A1,AL157461,AL832217,ARTN,ATP6V0B,B4GALT2,BC031250,BC036308,BC046120,BC059172,BC062297,BC068578,BC073924,BEST4,BMP8A,BX648912,C1orf102,C1orf108,C1orf109,C1orf113,C1orf149,C1orf164,C1orf176,C1orf210,C1orf212,C1orf216,C1orf50,C1orf78,C1orf84,C1orf94,CAP1,CCDC23,CCDC24,CCDC28B,CDC20,CDCA8,CITED4,CLDN19,CLSPN,…	Loss		0.0798485
1	1p32.3	1p32.3	51074952	52445376	127	-0.035	15	AF007170,AK127900,AK128043,AK130995,BTF3L4,C1orf34,CDKN2C,EPS15,FAF1,NRD1,OSBPL9,RAB3B,RNF11,TXNDC12,ZFYVE9	Loss		0.0612245
1	1p32.3	1p32.3	53189059	55267776	235	-0.0369	35	ACOT11,AK097571,AK122760,BSND,C1orf123,C1orf175,C1orf177,C1orf41,C1orf83,CDCP2,CPT2,DHCR24,DIO1,FLJ40434,LDLRAD1,LOC606495,LRP8,LRRC42,MAGOH,MRPL37,PARS2,PCSK9,PODN,SCP2,SLC1A7,SSBP3,TMEM48,TMEM59,TMEM61,TTC22,TTC4,USP24,YIPF1,DMRTB1,GLIS1	Loss		0.0612245
1	1p32.2	1p31.3	56415613	60261422	359	-0.0354	18	BC042048,C1orf168,C1orf87,C8A,C8B,CYP2J2,FLJ10986,HOOK1,PPAP2B,PRKAA2,AB067502,AK055150,CR627323,DAB1,JUN,LOC645757,MYSM1,TACSTD2	Loss		0.0612245
1	1p31.3	1p31.3	62197318	62284320	10	-0.0636			Loss		0.0408163
1	1p31.1	1p31.1	75443432	75550821	9	-0.0328			Loss		0.0408163
1	1p22.1	1p22.1	93423828	93535211	12	-0.0312			Loss		0.0408163
1	1p13.3	1p13.3	110712342	110784213	12	-0.0324	2	KCNA10,LOC440602	Loss		0.0408163
1	1p13.2	1p13.2	111738085	112535141	70	-0.026	9	ADORA3,AF070632,AK094737,BC034233,BC041707,C1orf183,DDX20,KCND3,RAP1A	Loss		0.0408163
1	1q21.2	1q21.2	146779880	147826957	142	0.2072	29	PLEKHO1,VPS45,ANP32E,ADAMTSL4,AK057901,APH1A,BC068606,C1orf51,C1orf54,CA14,ECM1,KIAA0460,MCL1,MRPS21,PRPF3,TARS2,OTUD7B,ENSA,GOLPH3L,ANXA9,FAM63A,ARNT,CTSK,CTSS,HORMAD1,BNIPL,LASS2,PRUNE,SETDB1	Gain	0.163265
1	1q21.3	1q21.3	149365900	149399354	7	-0.6211	1	LCE3D	Loss		0.132653
1	1q21.3	1q21.3	149369522	149399354	6	0.5215			Gain	0.259475
1	1q23.1	1q23.1	154137750	154335299	11	0.2958	1	FCRL5	Gain	0.165121
1	1q23.2	1q24.1	157143417	163139426	552	0.28365	69	AK123144,ITLN1,ITLN2,FCGR2B,ARHGAP30,DEDD,F11R,KLHDC9,PFDN2,PVRL4,USF1,AK097200,CD244,CD48,LY9,SLAMF7,FCRLA,FCGR2A,FCGR3A,FCGR3B,HSPA6,FCRLM1,SLAMF6,C1orf192,SDHC,NUF2,RGS4,RGS5,NHLH1,VANGL2,CD84,SLAMF1,B4GALT3,PPOX,UFC1,USP21,C1orf111,FLJ13137,NOS1AP,SH2D1B,ADAMTS4,AK127099,APOA2,BC028905,BX537951,FCER1G,MPZ,NDUFS2,NR1I3,PCP4L1,TOMM40L,AK055795,AK093302,ALDH9A1,BX640859,FAM78B,LMX1A,LOC400794,MG…	Gain	0.1626
1	1q31.2	1q31.2	189675680	190447762	51	0.2082	4	CDC73,GLRX2,TROVE2,UCHL5	Gain	0.265306
1	1q31.3	1q31.3	193470554	193532857	8	-0.1342	2	CFHR1,CFHR3	Loss		0.0994898
1	1q31.3	1q31.3	194626230	195125260	30	0.2819	4	NEK7,PTPRC,CR614163,LHX9	Gain	0.244898
1	1q31.3	1q32.1	195649583	196750971	46	0.2212	3	AK125573,BC040869,NR5A2	Gain	0.240905
1	1q32.1	1q32.1	199954049	200142193	21	0.2157	3	BTG2,FMOD,LOC730227	Gain	0.22449
1	1q32.1	1q32.1	201519752	201691173	20	0.2732	1	NFASC	Gain	0.163265
1	1q32.1	1q32.1	201777681	201870028	13	0.2708	3	CNTN2,RBBP5,RIPK5	Gain	0.163265
1	1q32.1	1q32.2	202409434	206416850	348	0.2306	49	CAMK1G,LAMB3,LOC642587,C1orf107,FAIM3,IL10,IL19,IL20,IL24,PIGR,C1orf116,C4BPB,FCAMR,PFKFB2,YOD1,C4BPA,CD55,CR1,CR2,FLJ13310,C1orf74,G0S2,HSD11B1,IRF6,TRAF3IP3,SRGAP2,DYRK3,IKBKE,LGTN,MAPKAPK2,RASSF5,PLXNA2,AK123264,AY114160,BC109190,CD46,CR1L,CD34,LOC148696,AVPR1B,C1orf186,SLC26A9,CTSE,FLJ32569,NUCKS1,PM20D1,RAB7L1,SLC41A1	Gain	0.20414
1	1q32.3	1q32.3	208143743	210081852	183	0.2758	22	ANGEL2,FLVCR1,LOC149643,LQK1,VASH2,C1orf48,TATDN3,CR605189,DTL,INTS7,LOC91548,LPGAT1,NEK2,PPP2R5A,RPS6KC1,ATF3,BATF3,BC028700,C1orf75,FAM71A,NENF,NSL1	Gain	0.227389
1	1q32.3	1q41	210228371	217239842	514	0.2167	27	KCNK2,KCTD3,CENPF,BX647076,ESRRG,GPATCH2,SPATA17,AK097467,SLC30A10,PTPN14,USH2A,BC039113,BC086863,LYPLAL1,RRP15,TGFB2,BC040896,EPRS,AK021928,IARS2,RAB3GAP2,AK092251,LOC284669,PROX1,SMYD2,BPNT1,MARK1	Gain	0.229532
1	1q44	1q44	245053940	245134469	12	-0.3636	1	OR2T10	Loss		0.0884354
2	2p24.1	2p24.1	20323589	20364809	9	-0.0815	2	PUM2,SDC1	Loss		0.0544218
2	2p23.3	2p23.3	25350118	25440922	13	-0.0324	1	DNMT3A	Loss		0.0612245
2	2p13.2	2p13.2	73212539	73248029	6	-0.0275			Loss		0.0408163
2	2q14.2	2q14.2	121309493	121434975	14	-0.0578			Loss		0.0772595
2	2q21.1	2q21.1	130848301	131033903	8	-0.0369	2	CFC1,PTPN18	Loss		0.0612245
2	2q21.1	2q21.1	132090059	132124716	5	-0.062			Loss		0.0408163
2	2q24.1	2q24.1	158796403	159362376	59	-0.0597	5	PKP4,UPP2,CCDC148,LOC130940,LOC554201	Loss		0.0408163
2	2q24.2	2q24.2	159733569	159893318	16	-0.0255			Loss		0.0408163
2	2q32.2	2q32.3	191488527	194341102	163	-0.1483	9	AK130181,GLS,MYO1B,OBFC2A,PCGEM1,SDPR,STAT1,STAT4,TMEFF2	Loss		0.0204082
2	2q36.3	2q36.3	230105726	230174409	10	-0.0271			Loss		0.0408163
2	2q37.1	2q37.1	233071655	233126756	9	-0.2192	3	ALPP,ALPPL2,BC067110	Loss		0.0816327
2	2q37.2	2q37.3	237081779	242784149	545	-0.0337	66	AF115510,AK002119,AK027477,AK057585,AK097730,ASB1,BX648107,COL6A3,COPS8,CXCR7,FLJ43879,IQCA,LOC151171,LOC200609,LOC93463,LRRFIP1,MLPH,PER2,PRLH,RAB17,RAMP1,SCLY,TRAF3IP1,UBE2F,AK056439,BC065821,FLJ45964,NDUFA10,37500,AK074062,BOK,FARP2,HDLBP,MTERFD2,MYEOV2,OTOS,PASK,PPP1R7,SNED1,STK25,THAP4,TMEM16G,AGXT,AQP12A,BC040629,C2orf54,GPC1,GPR35,KIF1A,LOC200772,LOC285191,AK057399,BC059397,C2orf19,ESPNL,F…	Loss		0.0738064
3	3p24.3	3p24.3	17583551	17674299	13	-0.0473			Loss		0.0204082
3	3p21.31	3p21.31	47039911	47199781	17	-0.0344			Loss		0.0612245
3	3p21.31	3p21.31	48578043	48608850	7	-0.0683			Loss		0.0612245
3	3p21.31	3p21.31	49687490	49739492	11	-0.1118			Loss		0.0779221
3	3p21.31	3p21.31	50156213	50694218	87	-0.0685	26	AK057063,C3orf18,CACNA2D2,CISH,HEMK1,MAPKAPK3,DOCK3,AK125500,CYB561D2,HYAL2,RASSF1,TMEM115,TUSC2,TUSC4,ZMYND10,AK096595,BC033528,C3orf45,GNAI2,GNAT1,HYAL1,HYAL3,IFRD2,SEMA3B,SEMA3F,SLC38A3	Loss		0.0616936
3	3p21.31	3p21.31	51158790	51225820	8	-0.0366			Loss		0.0612245
3	3p14.3	3p14.2	57822761	58633679	98	-0.037	12	ABHD6,ACOX2,AK054720,FAM107A,KCTD6,PDHB,PXK,RPP14,SLMAP,FAM3D,DNASE1L3,FLNB	Loss		0.0612245
3	3p14.2	3p14.1	59707052	65964775	583	-0.0379	22	ADAMTS9,AK126350,AL832189,ATXN7,C3orf49,CR617380,CR936762,FLJ44379,LOC730057,MAGI1,PRICKLE2,PSMD6,SYNPR,THOC7,AK094634,BC039502,C3orf14,CADPS,FEZF2,LOC285401,PTPRG,FHIT	Loss		0.0635348
3	3p14.1	3p14.1	68729273	69865166	102	-0.0362	5	AK091076,C3orf64,FRMD4B,TMF1,FAM19A4	Loss		0.0612245
3	3p13	3p12.3	70745877	74522041	274	-0.0369	15	LOC401072,CNTN3,GPR27,PROK2,AK021574,AK097190,FLJ10213,GLT8D4,LOC201617,PDZRN3,PPP4R2,RYBP,SHQ1,FOXP1,EIF4E3	Loss		0.0612245
3	3p12.3	3p12.3	75845446	75945949	7	-0.035	2	AK123776,ZNF717	Loss		0.0612245
3	3q22.3	3q22.3	137502368	137653605	18	-0.0649			Loss		0.0408163
3	3q26.1	3q26.1	163997236	164101843	10	-0.748			Loss		0.130612
3	3q27.1	3q27.1	185563344	185587982	6	-0.152			Loss		0.0612245
3	3q28	3q28	191501508	191560703	8	-0.0611	1	CLDN1	Loss		0.0204082
3	3q29	3q29	196908262	196962439	11	-0.205			Loss		0.218924
4	4p16.3	4p16.1	41413	8659873	911	-0.0301	124	OTOP1,ADD1,ADRA2C,AF085973,BX648772,C4orf10,C4orf15,C4orf8,DOK7,FLJ33718,FLJ35424,GRK4,HGFAC,HTT,LOC345222,LOC441005,LRPAP1,MXD4,NAT8L,NOL14,POLN,RGS12,RNF4,TETRAN,TNIP2,ZFYVE28,AF216184,AF338194,AK056081,AK056311,AK091017,AK094573,BC025734,BC029569,BX648674,C4orf6,CNO,CR596502,CRMP1,CYTL1,D4S234E,EVC,EVC2,FLJ46481,JAKMIP1,LOC339988,LOC93622,LYAR,MAN2B2,MRFAP1,MRFAP1L1,MSX1,PPP2R2C,S100P,STK32B,S…	Loss		0.0582898
4	4p15.33	4p15.33	11626829	12530279	28	-0.0729			Loss		0.0612245
4	4p15.33	4p14	15137253	37134650	1232	-0.0455	58	AK027420,BC025666,BC029598,BST1,BX648830,C4orf30,CC2D2A,CD38,FBXL5,FGFBP1,FGFBP2,KIAA1276,LAP3,LCORL,LDB2,LOC285550,MED28,MLR1,NCAPG,PROM1,QDPR,TAPT1,C4orf28,CR607430,GBA3,GPR125,KCNIP4,SLIT2,AK000030,AK124473,AK125145,ANAPC4,BC032043,CCKAR,DHX15,DKFZp761B107,FLJ45721,KIAA0746,LGI2,LOC389203,PI4K2B,PPARGC1A,RBPJ,SEPSECS,SLC34A2,SOD3,STIM2,TBC1D19,ZCCHC4,PCDH7,AK093205,AK131492,BC037904,BC042993,F…	Loss		0.0844156
4	4p14	4p12	40760825	48302657	575	-0.0326	35	SLAIN2,AK124778,ATP10D,BC041434,CNGA1,COMMD8,CORIN,COX7B2,GABRA2,GABRA4,GABRB1,GABRG1,GNPDA2,GUF1,KCTD8,LOC643449,LOC643464,NFXL1,NPAL1,TEC,TXK,X64802,YIPF7,APBB2,UCHL1,AK092951,ATP8A1,CCDC4,LOC152573,SLC30A9,TMEM33,WDR21B,KIAA1102,LIMCH1,PHOX2B	Loss		0.0612245
4	4q13.2	4q13.2	69203906	69312043	11	0.2988	3	U06641,UGT2B17,TMPRSS11E	Gain	0.378479
4	4q13.2	4q13.2	69203906	69312043	11	-1.1423	3	TMPRSS11E,U06641,UGT2B17	Loss		0.159555
4	4q13.2	4q13.2	70305861	70410919	10	-0.11995	1	UGT2B28	Loss		0.122449
4	4q34.1	4q34.1	174628472	174704135	17	-0.0484	5	AK091103,BC067829,HMGB2,SAP30,SCRG1	Loss		0.0204082
4	4q35.2	4q35.2	191062719	191166030	9	-0.0297	1	BC087857	Loss		0.0408163
5	5p15.33	5p15.33	739292	895001	15	-0.0998	3	TPPP,ZDHHC11,AK096220	Loss		0.120748
5	5p15.33	5p15.33	771310	895001	12	0.2626	1	AK096220,ZDHHC11	Gain	0.153741
5	5p15.33	5p15.33	1109693	1163662	8	-0.1118			Loss		0.0408163
5	5p15.33	5p15.33	1868930	1932462	11	-0.0532	2	IRX4,NDUFS6	Loss		0.0204082
5	5p15.2	5p15.2	11266653	11433880	20	-0.0257			Loss		0.0408163
5	5p15.1	5p15.1	17559190	17675026	6	-0.0286			Loss		0.0408163
5	5p14.3	5p14.3	20792335	20931799	8	-0.0437			Loss		0.0765306
5	5p12	5p12	45458531	45587907	14	-0.0417			Loss		0.0204082
5	5q11.1	5q21.1	49595677	100075179	3656	-0.0401	253	LOC647121,EMB,AK022625,RPS23,CR604031,CR936786,ISL1,PARP8,ANKRA2,AY643499,BC016740,BC030521,BDP1,BTF3,CARTPT,ENC1,FCHO2,FOXD1,HEXB,MAP1B,MCCC2,MRPS27,PTCD2,RGNEF,TMEM171,TNPO1,UTP15,ZNF366,LOC92270,MGC23909,TMEM167,AB024691,ACOT12,AGGF1,AK091868,AK096680,AL833087,ANKRD31,AP3B1,ARSB,ATG10,BC050737,BC112266,BHMT,BHMT2,C5orf37,CCDC125,CCNB1,CDK7,CENPH,CKMT2,CMYA5,COL4A3BP,CR936660,CR936791,CRHBP,DHF…	Loss		0.0684031
5	5q21.1	5q21.3	101062341	106517966	260	-0.0267	11	BC017431,C5orf30,CR610784,GIN1,HISPPD1,LOC285708,NUDT12,PAM,RAB9P1,SLCO4C1,SLCO6A1	Loss		0.0408163
5	5q21.3	5q23.1	107494803	115233644	589	-0.0269	42	AK096057,AK097686,AK128596,AP3S1,APC,ATG12,BX647710,C5orf13,C5orf26,CCDC112,CDO1,CTNNA1,DCP2,EPB41L4A,FEM1C,FLJ11235,KCNN2,MCC,MGC39633,PGGT1B,REEP5,SRP19,TICAM2,TMED7,TRIM36,TSSK1B,YTHDC2,AL832599,CAMK4,CR749489,STARD4,TSLP,WDR36,SLC25A46,AK093222,AK123847,FER,FLJ43080,LOC285638,MAN2A1,PJA2,FBXL17	Loss		0.0408163
5	5q23.1	5q23.1	119854852	120722431	47	-0.0292	1	PRR16	Loss		0.0408163
5	5q23.2	5q31.1	126844048	136142169	857	-0.056	85	RAPGEF6,39692,AB075840,ACSL6,AF086294,AFF4,AK026965,AK122953,ANKRD43,BC012749,BC030525,BC033341,BC042122,BC042835,BC043424,BX640845,C5orf15,C5orf20,C5orf24,CAMLG,CATSPER3,CDKL3,CDKN2AIPNL,CSF2,CXCL14,DDX46,FBXL21,FSTL4,GDF9,H2AFY,HSPA4,IL13,IL3,IL4,IL5,IL9,IRF1,KIF3A,LEAP2,LECT2,LOC153328,LOC340074,LOC389332,LOC441108,MGC13017,NEUROG1,P4HA2,PCBD2,PDLIM4,PHF15,PITX1,PPP2CA,RAD50,SAR1B,SEC24A,SHROO…	Loss		0.0466268
5	5q31.2	5q31.2	138706115	138756641	13	-0.0331			Loss		0.0408163
5	5q32	5q32	149744376	149794312	9	-0.0296	3	RPS14,CD74,TCOF1	Loss		0.0408163
5	5q35.3	5q35.3	179952112	180018584	9	-0.0674	1	FLT4	Loss		0.0408163
6	6p25.3	6p25.3	204528	341445	14	-0.0584	2	IRF4,DUSP22	Loss		0.074344
6	6p22.3	6p22.3	20716660	20803461	10	-0.0317			Loss		0.0408163
6	6p22.1	6p21.33	29962849	30010293	6	-0.0456			Loss		0.0612245
6	6p21.32	6p21.32	32030797	32150167	16	-0.0428			Loss		0.0344388
6	6p21.32	6p21.32	32558677	32660134	10	0.5447	2	HLA-DRB5,HLA-DRB6	Gain	0.197959
6	6p21.32	6p21.32	32595402	32660134	7	-0.121	2	HLA-DRB5,HLA-DRB6	Loss		0.0495627
6	6p21.32	6p21.32	32718991	32738502	5	-0.0322	2	HLA-DQA1,HLA-DQB1	Loss		0.0408163
6	6p21.1	6p21.1	41022705	44303538	414	-0.0254	83	ABCC10,AJ586139,AK024736,AK095548,AK096276,AK123786,AK124657,APOBEC2,BC068247,BX648193,BYSL,BZRPL1,C6orf108,C6orf130,C6orf206,CAPN11,CCND3,CNPY3,CR936713,CUL7,D87077,DLK2,DQ141194,FLJ11236,FLJ38717,FOXP4,FRS3,GTPBP2,GUCA1A,GUCA1B,KIAA0240,KLC4,LOC221442,LOC285857,MAD2L1BP,MDFI,MGC45491,MRPL14,MRPL2,MRPS10,MRPS18A,NCR2,NFYA,PARC,PGC,POLH,POLR1C,PRICKLE4,PRPH2,PTCRA,PTK7,RPL7L1,SLC22A7,SLC29A1,SRF,…	Loss		0.0408163
6	6q14.1	6q22.31	77265295	119458130	2762	-0.0287	204	HTR1B,AK098678,C6orf152,IRAK1BP1,LCA5,SH3BGRL2,AF520419,AIM1,AK124171,AK125137,AK127146,ARMC2,ATG5,AY927446,BC018059,BC064365,BC107113,BVES,C6orf112,C6orf182,C6orf199,C6orf203,CD164,CDC40,DDO,FIG4,FLJ25791,FLJ37396,FLJ42177,FOXO3,GPR6,HACE1,KIAA1553,LACE1,LIN28B,LOC442240,LOC553137,LOC642741,MICAL1,NR2E1,OSTM1,PDSS2,POPDC3,PPIL6,PRDM1,PREP,QRSL1,RTN4IP1,SCML4,SEC63,SESN1,SLC22A16,SMPD2,SNX3,SOBP,…	Loss		0.0408163
6	6q16.3	6q16.3	102434890	103873643	55	0.2201	1	GRIK2	Gain	0.0331171
6	6q21	6q21	105551132	106624701	68	0.2334	5	BVES,C6orf112,LIN28B,POPDC3,PREP	Gain	0.0612245
6	6q21	6q21	106834224	108938190	183	0.3346	18	LOC553137,QRSL1,C6orf203,KIAA1553,PDSS2,SOBP,SCML4,LACE1,AF520419,LOC642741,NR2E1,OSTM1,SEC63,SNX3,AIM1,AK125137,ATG5,RTN4IP1	Gain	0.0612245
6	6q22.1	6q22.1	117707613	117925931	24	0.2005			Gain	0.0679157
6	6q22.31	6q22.31	121773485	121823869	7	-0.0292	1	GJA1	Loss		0.0408163
6	6q23.3	6q23.3	135227579	135548767	30	0.2196	3	ALDH8A1,HBS1L,MYB	Gain	0.0612245
6	6q23.3	6q23.3	135659933	135744546	9	0.2142			Gain	0.0748299
6	6q24.3	6q27	147205379	170943147	1953	-0.0908	154	AF001629,ARID1B,SNX9,ZDHHC14,AB095936,BC016684,CNKSR3,LOC729436,PIP3-E,RBM16,TFB1M,TIAM2,AK129771,CR618966,DYNLT1,EZR,GTF2H5,LOC202459,RSPH3,SERAC1,SYNJ2,SYTL3,TAGAP,TMEM181,TULP4,AF425244,AK023412,AKAP12,BC016788,BC031960,BC044307,C6orf211,C6orf71,CR613874,IYD,LOC389432,LOC729178,LRP11,MAP3K7IP2,MTHFD1L,NUP43,PCMT1,PLEKHG1,PPIL4,PPP1R14C,RAET1E,RAET1G,RMND1,SAMD5,SASH1,STXBP5,ULBP1,ULBP2,ULBP3,U…	Loss		0.123463
7	7p22.1	7p22.1	5058944	5163977	10	-0.0416	4	KIAA1856,SLC29A4,AB058759,BC009270	Loss		0.0204082
7	7p21.1	7p21.1	19340782	19534885	12	0.2399	2	TMEM196,TWISTNB	Gain	0.0612245
7	7p15.3	7p15.3	21801110	22302251	39	0.2013	2	MGC87042,RAPGEF5	Gain	0.0486656
7	7p15.2	7p15.2	26597976	27253484	73	0.2014	17	HOXA1,HOXA2,LOC402643,SKAP2,EVX1,HOXA3,HOXA4,HOXA5,LOC285943,BC025338,HOXA10,HOXA11,HOXA13,HOXA9,HOXA6,HOXA7,LOC285944	Gain	0.0612245
7	7q11.22	7q11.22	68489136	68540677	6	-0.0486	1	AUTS2	Loss		0.0204082
7	7q34	7q34	141947816	141989351	9	-0.0786			Loss		0.0612245
7	7q34	7q34	142342680	142407505	12	-0.0265	2	PIP,TAS2R39	Loss		0.0408163
7	7q36.1	7q36.1	150182084	150255433	15	-0.0257			Loss		0.0408163
8	8p23.3	8p12	90816	36380478	2943	-0.0646	241	LOC389634,FAM86B1,C8orf8,LOC157740,C8orf15,C8orf5,C8orf6,ZNF705A,AJ301562,CTSB,FDFT1,MTMR9,TDH,BC040270,BC032892,DEFB136,AJ291678,BLK,C8orf49,GATA4,NEIL2,LZTS1,LOC340357,LONRF1,AK122582,AL833872,LOC157273,PRAGMIN,ATP6V1B2,ChGn,CR604792,INTS10,LPL,SH2D4A,SLC18A1,PPP2CB,PURG,TEX15,UBXD6,WRN,DCTN6,RBPMS,BC038538,LOC286114,UNC5D,AK092377,PNMA2,AK054638,BC003524,BC012900,BC082237,BX648950,C8orf50,C8or…	Loss		0.0664351
8	8p12	8p12	32936696	33525017	48	0.2692	5	BC034319,C8orf41,FUT10,RBM13,RNF122	Gain	0.0189381
8	8p12	8p12	33964205	34928039	47	0.2882			Gain	0.0616497
8	8p12	8p11.21	35980559	41836622	483	0.3408	47	ADAM3A,ADAM5P,FGFR1,LETM2,WHSC1L1,DDHD2,PPAPDC1B,FLJ43582,ASH2L,EIF4EBP1,ADRB3,GOT1L1,LSM1,STAR,BRF2,GPR124,RAB11FIP1,LOC157860,BC031939,ERLIN2,ZNF703,PROSC,BAG4,ZMAT4,TACC1,SFRP1,AB209418,ANK1,ADAM32,AGPAT6,GINS4,NKX6-3,AK098787,GOLGA7,C8orf4,ADAM9,HTRA4,PLEKHA2,TM2D2,AK128691,INDO,INDOL1,ADAM18,ADAM2,FKSG2,KCNU1,BC028701	Gain	0.214286
8	8p12	8p11.23	38470767	38916424	38	-0.0318	3	FLJ43582,AK098787,TACC1	Loss		0.0375206
8	8p11.23	8p11.22	39128088	39535714	48	-0.0344	3	ADAM32,ADAM3A,ADAM5P	Loss		0.0612245
8	8q11.1	8q11.21	48067862	48784983	59	0.2077	1	KIAA0146	Gain	0.163265
8	8q11.21	8q11.23	51029733	55624825	341	0.2202	15	SNTG1,PXDNL,BC033145,LOC286071,PCMTD1,RB1CC1,ST18,UNQ9433,OPRK1,ATP6V1H,LYPLA1,MRPL15,RGS20,TCEA1,SOX17	Gain	0.204082
8	8q12.1	8q24.3	61413750	146264902	6536	0.4867	461	SNTB1,BC042052,TAF2,DCC1,DEPDC6,PVT1,AK093407,BC038572,FAM84B,CSMD3,NSMCE2,TRIB1,LOC650095,COLEC10,MAL2,NOV,SAMD12,TNFRSF11B,KIAA0196,LOC157381,MTSS1,SQLE,ZNF572,AK127771,CR936831,FAM135B,ENPP2,NDUFB9,TATDN1,BC009730,CR933665,RNF139,TRMT12,M13930,MYC,BC040336,BC041064,HAS2,AK023916,BC036192,COL14A1,MRPL13,MTBP,LOC286052,TMEM65,TRPS1,CCDC26,CR593328,NCALD,KCNV1,RSPO2,RAD21,EXT1,C8orf54,C8ORFK23,TP…	Gain	0.408163
8	8q12.2	8q12.2	61817491	61876306	9	-0.0469			Loss		0.00175168
8	8q24.23	8q24.23	137762418	137919367	7	-0.0442			Loss		0.0204082
9	9p24.3	9p24.3	330083	462145	16	-0.0391			Loss		0.0612245
9	9p24.3	9p24.3	640801	710149	8	-0.0343			Loss		0.0612245
9	9p24.3	9p21.3	1409154	24197890	1813	-0.0628	104	BX640951,C9orf138,C9orf94,RRAGA,ADAMTSL1,AB210041,AF161360,CER1,PSIP1,SNAPC3,ZDHHC21,AK131233,NFIB,BC047085,C9orf123,C9orf38,GLDC,IL33,JMJD2C,TPD52L3,UHRF2,ADFP,AF370405,AK094196,AK127963,ASAH3L,C9orf52,DENND4C,FAM29A,FREM1,RPS6,C9orf39,C9orf93,LOC286299,SH3GL2,AK123856,MLLT3,SLC24A2,AK123194,MPDZ,PTPRD,BNC2,MGC24103,AK021739,AK075059,AK092343,AK126819,AK128171,AK3,AL832239,BC036853,BC041456,BC04…	Loss		0.0868219
9	9p21.3	9p21.2	24986233	25796726	33	-0.0379	3	AK093337,BC043546,TUSC1	Loss		0.0612245
9	9p21.1	9p21.1	30347226	30490263	10	-0.0362	2	BC022036,LOC401497	Loss		0.0612245
9	9p21.1	9p21.1	31181538	31860153	37	-0.1233	1	AK124280	Loss		0.0408163
9	9p13.3	9p13.3	33368273	33407887	5	-0.1038	1	AQP7	Loss		0.0612245
9	9p13.3	9p13.2	35690698	38471347	306	-0.0269	40	ALDH1B1,IGFBPL1,C9orf127,C9orf19,CCIN,CLTA,CR599555,GNE,LOC92973,OR2S2,RECK,RNF38,UNQ338,BC014254,C9orf128,CREB3,GBA2,HINT2,NPR2,RGP1,SPAG8,TLN1,AK057054,BC094765,MCART1,SHB,BX641092,CR608042,EXOSC3,FBXO10,FRMPD1,GRHPR,LOC401504,MELK,PAX5,POLR1E,RG9MTD3,ZBTB5,ZCCHC7,WDR32	Loss		0.0418167
9	9q21.13	9q21.13	72988858	76261823	207	-0.0464	14	AK122718,BC043649,C9orf40,C9orf41,C9orf95,OSTF1,PCSK5,RFK,TRPM6,AK125162,ANXA1,BC041938,BC043560,RORB	Loss		0.0204082
9	9q34.11	9q34.11	129778364	129889591	14	-0.0254			Loss		0.0408163
9	9q34.2	9q34.2	134547308	134558379	5	-0.3191			Loss		0.142857
9	9q34.3	9q34.3	135619631	135648839	8	-0.0599	2	LCN1,MRPS2	Loss		0.0408163
9	9q34.3	9q34.3	136510745	138397951	277	-0.0711	69	AB058779,AK092558,ARRDC1,CACNA1B,EHMT1,LOC643224,MRPL41,WDR85,ZMYND19,C9orf111,ABCA2,ANAPC2,C8G,C9orf140,C9orf142,C9orf167,C9orf75,CR607386,DPP7,EDF1,ENTPD2,ENTPD8,FBXW5,FLJ20433,FLJ36268,FLJ45224,FUT7,GRIN1,LCN12,LOC401565,LOC653325,MAN1B1,NDOR1,NELF,NOXA1,NPDC1,NRARP,PNPLA7,PTGDS,RP13-122B23.3,SLC34A3,SSNA1,TMEM203,TRAF2,UAP1L1,AB002308,INPP5E,PMPCA,SDCCAG3,SEC16A,SNAPC4,C9orf86,KIAA1984,MAMDC4…	Loss		0.0766964
10	10q23.31	10q23.31	89272042	91488680	226	-0.0646	22	AK091558,AK096406,ANKRD22,AY692464,C10orf59,CH25H,FAS,FLJ37201,IFIT1,IFIT5,LIPA,LIPF,LIPJ,MPHOSPH1,PANK1,SLC16A12,STAMBPL1,ATAD1,BC031631,MINPP1,PAPSS2,PTEN	Loss		0.0421709
10	10q23.31	10q23.31	92200218	92441216	12	-0.0316	1	BC030278	Loss		0.0408163
10	10q23.32	10q23.32	94005613	94057039	6	-0.0587			Loss		0.0408163
10	10q23.33	10q23.33	95893337	96894004	99	-0.0251	9	CYP2C18,CYP2C19,CYP2C8,CYP2C9,G36540,HELLS,NOC3L,TBC1D12,U61098	Loss		0.0408163
10	10q24.1	10q24.1	98597838	98657476	10	-0.0275			Loss		0.0408163
10	10q26.3	10q26.3	133863214	134790009	104	-0.0327	14	AK095503,AK098366,AK125849,BC039552,C10orf91,C10orf92,C10orf93,DPYSL4,GPR123,INPP5A,LRRC27,PWWP2,PWWP2B,STK32C	Loss		0.0612245
11	11p15.5	11p15.4	182372	3601945	406	-0.0672	85	AK123648,LOC650465,ZNF195,C11orf36,CARS,NAP1L4,OSBPL5,BET1L,ODF3,PSMD13,RIC8A,SIRT3,BC019904,C11orf21,CD81,CDKN1C,KCNQ1DN,LOC338653,PHLDA2,SLC22A18,SLC22A18AS,TRPM5,TSPAN32,TSSC4,AF015521,AK123483,AP2A2,BC007626,CD151,CEND1,CHID1,DEAF1,DRD4,EFCAB4A,EPS8L2,HRAS,IRF7,KIAA1542,LOC692247,LRDD,LRRC56,M22406,MUC2,MUC5AC,MUC5B,MUPCDH,NS3BP,PDDC1,PNPLA2,POLR2L,RASSF7,RPLP2,SLC25A22,TALDO1,TMEM80,TOLLIP,T…	Loss		0.105861
11	11p15.4	11p15.4	3641137	6400536	381	-0.0349	64	AK024180,AL096753,APBB1,ART1,AY034471,BC015537,BC020770,BC022401,C11orf40,C11orf42,C11orf56,CCKBR,CHRNA10,CNGA4,CR591899,FRAG1,HBB,HBBP1,HBE1,HBG1,MGC20470,MMP26,NUP98,OR51B2,OR51B4,OR51B5,OR51B6,OR51E1,OR51E2,OR51F2,OR51G2,OR51I1,OR51I2,OR51L1,OR51M1,OR51Q1,OR51S1,OR51V1,OR52A1,OR52A5,OR52B6,OR52D1,OR52E4,OR52E5,OR52I2,OR52J3,OR52K3P,OR52N2,OR52N4,OR52N5,OR56B1,PRKCDBP,RHOG,RRM1,SMPD1,STIM1,TRIM…	Loss		0.0612245
11	11p15.4	11p15.4	6652036	6984179	51	-0.04	9	BX538318,GVIN1,MRPL17,OR6A2,BC014538,OR10A4,OR10A5,ZNF214,ZNF215	Loss		0.0612245
11	11p15.4	11p15.4	7705868	7943170	28	-0.0381	6	AK091855,BC041711,NLRP10,OR10A3,OR5P2,OR5P3	Loss		0.0677843
11	11p15.4	11p15.4	9127512	10423393	135	-0.0352	12	ADM,AMPD3,CR598129,IPO7,LOC440028,LOC644656,RAB6IP1,SBF2,SWAP70,TMEM41B,WEE1,ZNF143	Loss		0.0612245
11	11p15.1	11p14.2	21298138	26557664	285	-0.0362	9	LUZP2,TMEM16C,FANCF,GAS2,NELL1,SLC17A6,SVIP,TMEM16E,CR608644	Loss		0.0486932
11	11p12	11p11.2	42927196	44811705	155	-0.0286	11	AK097541,DKFZP564C152,EXT2,HSD17B12,LOC390110,PHACS,API5,TTC17,ALX4,CD82,TP53I11	Loss		0.0408163
11	11p11.2	11p11.2	46693095	48312556	199	-0.0295	30	FNBP4,ACP2,BC041172,BC046346,BX647491,CKAP5,F2,LRP4,MADD,MYBPC3,NR1H3,SPI1,OR4C3,OR4X1,AGBL2,C1QTNF4,CUGBP1,KBTBD4,MTCH2,NDUFS3,PTPMT1,NUP160,PTPRJ,C11orf49,DDB2,PACSIN3,ZNF289,PSMC3,RAPSN,SLC39A13	Loss		0.0408163
11	11p11.12	11p11.12	49655667	49688892	5	-0.0292			Loss		0.0408163
11	11q11	11q11	54836429	55112388	29	-0.0273	1	OR4A16	Loss		0.0408163
11	11q11	11q11	55124730	55195049	11	0.3416	2	CR593785,OR4P4	Gain	0.384045
11	11q11	11q11	55124730	55772649	98	-0.0394	11	OR5I1,OR5L2,OR5W2,SPRYD5,AK055955,OR5J2,OR5T2,OR8K5,OR5D13,CR593785,OR4P4	Loss		0.0641399
11	11q12.1	11q13.2	56991050	66147459	1214	-0.0418	241	ACTN3,AK127603,BBS1,CCDC87,CCS,CTSF,DPP3,MRPL11,PELI3,RBM14,ZDHHC24,AK090761,B3GNT1,BRMS1,CATSPER1,CD248,CNIH2,GAL3ST3,KLC2,NPAS4,RAB1B,RIN1,SF3B2,SLC29A2,TMEM151A,YIF1A,BANF1,C11orf68,CCDC85B,CST6,DRAP1,EIF1AD,FOSL1,SART1,TSGA10IP,PACS1,LOC399898,OR10W1,OR5B17,OR9Q1,AK096335,CLP1,MED19,TXNDC14,YPEL4,ZDHHC5,CD5,SERPING1,SMTNL1,TIMM10,UBE2L6,FIBP,GLYAT,GLYATL2,LPXN,OR5B12,ZFP91,CTNND1,AB231761,MS4…	Loss		0.0626366
11	11q13.2	11q13.2	67520412	67541719	5	-0.0311	2	ALDH3B1,UNC93B1	Loss		0.0408163
11	11q13.3	11q13.4	68620325	70472290	168	0.4452	16	BC039105,CCND1,ORAOV1,PPFIA1,FGF4,FADD,FGF3,FGF19,TMEM16A,CTTN,AK000473,MYEOV,SHANK2,DQ152234,TPCN2,C11orf76	Gain	0.151361
11	11q13.4	11q13.4	70513116	70552761	7	-0.0416			Loss		0.058309
11	11q13.4	11q13.4	70896315	71387085	30	-0.0296	9	KRTAP5-8,AK124560,FAM86C,KRTAP5-10,KRTAP5-9,AK131288,olfactory receptor, family 7, subfamily E, member,IL18BP,RNF121	Loss		0.0408163
11	11q13.4	11q13.4	71645960	74664655	329	-0.0383	40	AB209473,CENTD2,STARD10,CLPB,ARRB1,ATG16L2,LOC441617,SLCO2B1,ARHGEF17,BX641058,FCHSD2,P2RY2,P2RY6,KIAA0280,PLEKHB1,RELT,TNFRSF19L,PDE2A,AB082522,AK056364,BC065746,C2CD3,CHCHD8,CHRDL2,DKFZP586P0123,DNAJB13,KCNE3,MRPL48,NEU3,PAAF1,POLD3,RAB6A,RNF169,SPCS2,XRRA1,P4HA3,PGM2L1,PPME1,UCP2,UCP3	Loss		0.0612245
11	11q13.4	11q13.4	72872627	73036100	19	0.2211	2	KIAA0280,PLEKHB1	Gain	0.0546492
11	11q13.4	11q13.4	73148662	73446065	41	0.2076	9	C2CD3,DKFZP586P0123,UCP2,UCP3,CHCHD8,DNAJB13,MRPL48,PAAF1,RAB6A	Gain	0.0655209
11	11q13.5	11q14.1	75466905	80392531	373	0.4857	37	HBXAP,RSF1,GAB2,CLNS1A,C11orf67,INTS4,BC039514,NARS2,AQP11,PAK1,GDPD4,MYO7A,AF009227,AB037723,CAPN5,USP35,KCTD14,AK056231,AK124949,ALG8,KCTD21,LOC283219,NDUFC2,THRSP,PHCA,BX640737,ODZ4,LRRC54,TSKU,B3GNT6,C11orf30,LRRC32,UVRAG,LOC387790,PRKRIR,WNT11,AY726583	Gain	0.163265
11	11q13.5	11q13.5	76429988	76485348	9	-0.0294	2	B3GNT6,CAPN5	Loss		0.0371505
11	11q14.1	11q14.3	78151076	88174427	708	-0.0378	40	AB037723,AF009227,AY726583,BC041900,AK091677,C11orf73,CCDC81,ME3,ANKRD42,BC070093,CCDC90B,DKFZp547G183,CCDC83,CCDC89,CR749820,CREBZF,EED,PICALM,SYTL2,TMEM126A,TMEM126B,ZF,PRSS23,CTSC,GRM5,RAB38,AF438406,AK058145,BC032890,C11orf82,FLJ25416,MGC33846,PCF11,PRCP,RAB30,DLG2,BC041984,BC063022,FZD4,TMEM135	Loss		0.0628099
11	11q14.3	11q25	88778779	134432324	3777	-0.0497	375	AASDHPPT,AK022090,AK095313,BC034795,GRIA4,KBTBD3,KIAA1826,AK057189,NOX4,PSMAL,TRIM49,AB231723,AB231766,ACAT1,AK055250,AK074084,AK091132,AK097805,AK125524,AK128062,AK128199,ALKBH8,AMOTL1,ANGPTL5,ANKRD49,BC031306,BC032472,BC033698,BC039334,BIRC2,BIRC3,C11orf70,CASP1,CASP12,CASP4,CASP5,CCDC82,CEP57,COP1,CR749642,CUL5,CWC15,CWF19L2,DCUN1D5,DYNC2H1,ELMOD1,ENDOD1,FAM76B,FLJ32810,FUT4,GPR83,GUCY1A2,ICEB…	Loss		0.0785528
12	12p13.31	12p13.31	5651251	5770034	16	-0.0381			Loss		0.0612245
12	12p13.31	12p13.31	6102329	7205923	164	-0.0269	51	VWF,ACRBP,AK055183,ATN1,BX647288,C12orf53,C12orf57,C1R,C1RL,C1S,CD4,CD9,CDCA3,CHD4,CLSTN3,CNAP1,COPS7A,CR590063,EMG1,ENO2,GAPDH,GNB3,GPR162,GPR92,HOM-TES-103,ING4,LAG3,LEPREL2,LRRC23,LTBR,MBOAT5,MLF2,MRPL51,NOL1,OACT5,PHB2,PLEKHG6,PTMS,PTPN6,RBP5,SCNN1A,SPSB2,TAPBPL,TNFRSF1A,TNFRSF7,TPI1,U80738,UNQ2963,USP5,VAMP1,ZNF384	Loss		0.0408163
12	12p13.31	12p13.31	8036400	8062485	5	-0.0276			Loss		0.0408163
12	12p13.31	12p13.31	9446682	9626795	7	-0.0282	1	BX647938	Loss		0.0408163
12	12p12.2	12p12.1	20885647	21451272	60	-0.0278	5	IAPP,LST-3TM12,SLCO1A2,SLCO1B1,SLCO1B3	Loss		0.0408163
12	12p11.21	12p11.21	32051488	32100111	5	-0.0532			Loss		0.0204082
12	12q13.2	12q13.2	53741801	53901086	16	-0.0415			Loss		0.0204082
12	12q24.33	12q24.33	130258234	130340276	6	-0.0584			Loss		0.0408163
12	12q24.33	12q24.33	131438121	131808636	39	-0.0277	8	AB046765,AK055773,KIAA1545,LOC642031,P2RX2,AB040672,AY945262,MUC8	Loss		0.0408163
13	13q11	13q22.1	18065953	72132153	4416	-0.0762	292	AF091526,AK054845,AK091626,AK093279,AK125458,AK127263,AK130366,AL137411,ATP12A,ATP8A2,AY927572,BC007357,BC022569,BC024195,BC034944,BC038727,BC039674,BC042735,BX648445,C1QTNF9,CDK8,CENPJ,CR598049,CRYL1,EFHA1,FAM123A,FGF9,FLJ46358,FLT3,GJA3,GJB2,GJB6,GPR12,GSX1,GTF3A,HMGB1,IFT88,IL17D,KATNAL1,KIAA0774,LATS2,LNX2,LOC283535,LOC283537,LOC374491,LOC387911,LOC440131,LOC646482,LOC650794,LOC728099,LOC7296…	Loss		0.0612245
13	13q13.1	13q13.1	31659615	31712005	8	0.2077			Gain	0.00767617
13	13q22.3	13q31.1	77236234	85441281	397	-0.0283	15	AK002196,BC036310,BC042526,C13orf7,LOC780529,NDFIP2,POU4F1,RBM26,SPRY2,BC031243,BX647243,EDNRB,SLAIN1,SLITRK6,SLITRK1	Loss		0.0408163
13	13q31.1	13q31.1	85890716	86073799	7	-0.0271			Loss		0.0408163
13	13q32.1	13q32.1	94150824	94840180	72	-0.0263	5	AK055459,BC063871,SOX21,BC045767,ABCC4	Loss		0.0436508
13	13q32.1	13q32.1	95632473	96375684	95	-0.0257	2	AY956767,HS6ST3	Loss		0.0408163
13	13q32.1	13q32.2	96673053	98021136	139	-0.0267	5	RAP2A,FARP1,RANBP5,STK24,MBNL2	Loss		0.0408163
13	13q33.3	13q33.3	107088143	107140754	5	-0.0659			Loss		0.0408163
13	13q33.3	13q34	108454448	114123908	550	-0.0533	51	IRS2,MYO16,ANKRD10,BC040271,FLJ10769,ING1,RAB20,AK091058,BC034786,BC038751,BX649107,C13orf28,CR627049,FLJ26443,LOC440149,SOX1,COL4A2,LOC283485,AK057970,LOC283487,FLJ12118,TUBGCP3,ADPRHL1,ATP4B,BC080640,CUL4A,DCUN1D2,DKFZp451A211,F10,F7,GRTP1,LAMP1,PCID2,PROZ,TFDP1,TMCO3,AK092053,FAM70B,FLJ44054,GRK1,ARHGEF7,C13orf16,COL4A1,C13orf8,UPF3A,ATP11A,MCF2L,MGC2780,GAS6,CDC16,RASA3	Loss		0.0830427
14	14q11.2	14q11.2	19268776	19490689	30	0.2008	4	BC020999,OR4K2,OR4K1,OR4K5	Gain	0.244898
14	14q11.2	14q11.2	19268776	19497082	31	-0.0711	4	BC020999,OR4K2,OR4K5,OR4K1	Loss		0.115207
14	14q11.2	14q11.2	21766804	22012322	31	-0.0376			Loss		0.0526662
14	14q11.2	14q11.2	23799012	23973108	35	-0.0268	13	ADCY4,AK054752,C14orf21,CIDEB,KIAA0323,KIAA1305,LTB4R,NFATC4,RIPK3,TGM1,RABGGTA,CR625243,DHRS1	Loss		0.0501458
14	14q21.1	14q21.1	39505875	39661561	10	-0.0263			Loss		0.0408163
14	14q23.1	14q23.1	60263795	60505082	31	-0.0374			Loss		0.0612245
14	14q23.3	14q23.3	66139280	66538159	46	-0.0384			Loss		0.0612245
14	14q23.3	14q24.3	66843238	77620631	1277	-0.0324	133	ABCD4,ACOT2,ACOT4,ACOT6,ACYP1,ADCK1,AHSA1,AK055797,AK092322,ALDH6A1,ALKBH1,ANGEL1,BATF,BC009202,BC013914,BC038792,BC044808,C14orf1,C14orf115,C14orf118,C14orf133,C14orf140,C14orf148,C14orf156,C14orf166B,C14orf174,C14orf178,C14orf179,C14orf4,C14orf43,C14orf44,C14orf45,CHX10,COQ6,DLST,DNAL1,EIF2B2,ENTPD5,ESRRB,FCF1,FLVCR2,FOS,GSTZ1,ISCA2,JDP2,KIAA0317,KIAA1737,LIN52,LOC646701,LOC729988,LTBP2,MLH3,NE…	Loss		0.0628865
14	14q32.11	14q32.13	89799676	95055633	617	-0.0337	68	C14orf102,PSMC1,AK095250,C14orf159,C14orf161,CATSPERB,CCDC88C,FBLN5,GPR68,PP8961,SMEK1,TC2N,TRIP11,BC039305,CALM1,LOC283588,LOC400238,RPS6KA5,TTC7B,AK058134,ATXN3,BTBD7,C14orf109,C14orf113,C14orf130,C14orf139,C14orf142,C14orf49,CHGA,CLMN,COX8C,CPSF2,DICER1,FLJ45244,GOLGA5,KIAA0500,KIAA1409,LGMN,MOAP1,NDUFB1,RIN3,SLC24A4,AK057078,AK093049,ASB2,BX248259,C14orf152,C14orf48,C14orf86,DDX24,FAM14A,FAM1…	Loss		0.0615553
14	14q32.2	14q32.33	99053553	105467576	827	-0.0273	87	BC039687,CYP46A1,EML1,KIAA1822,AK123840,AF422192,AK057240,AK093342,AK094562,ANKRD9,BAG5,BC032902,BX248279,C14orf131,C14orf153,C14orf172,C14orf2,C14orf73,CINP,CKB,CR620068,DIO3,DIO3OS,DLK1,DYNC1H1,EIF5,FLJ41170,KIAA0329,KLC1,KNS2,LOC646590,MARK3,MEG3,MEG8,PPP2R5C,RAGE,RCOR1,SNORD114-3,TDRD9,TNFAIP2,U56244,WDR20,XRCC3,ZFYVE21,C14orf68,DEGS2,EVL,SLC25A29,WARS,WDR25,YY1,AK057986,PPP1R13B,AMN,TRAF3,AH…	Loss		0.0517731
14	14q32.33	14q32.33	105643293	106002238	31	-0.1018			Loss		0.0941409
14	14q32.33	14q32.33	106260876	106349815	13	-0.0251	4	AF184765,AY393068,AK129787,LOC90925	Loss		0.0408163
15	15q11.2	15q11.2	18683110	20249945	71	-0.2257	8	CR622584,AY941978,POTE15,LOC651964,LOC283755,AB066967,BCL8,LOC727924	Loss		0.208393
15	15q11.2	15q11.2	22976410	23050272	9	-0.0875	5	AF400495,AF400497,AF400499,AF400501,AF400491	Loss		0.0748299
15	15q12	15q12	23233721	23314208	8	-0.065	2	BC041438,UBE3A	Loss		0.0408163
15	15q14	15q14	32443495	32654620	23	-0.2562	4	AGPAT7,GOLGA8A,GOLGA8B,BX648160	Loss		0.0922804
15	15q14	15q14	33527412	33603348	11	-0.0596			Loss		0.0408163
15	15q15.3	15q15.3	41676219	41729144	9	-0.0336			Loss		0.0408163
15	15q23	15q23	68956009	69213133	27	-0.0346	4	AK131551,LOC196993,LRRC49,THAP10	Loss		0.0612245
15	15q24.3	15q24.3	74518400	74946676	51	-0.0391			Loss		0.0612245
15	15q24.3	15q24.3	75213738	75544754	34	-0.1199	3	AB082533,C15orf5,HMG20A	Loss		0.0540216
15	15q24.3	15q24.3	75965427	76070006	10	-0.0304	3	BC047538,LOC647995,LOC91450	Loss		0.0408163
15	15q25.1	15q25.1	76841291	76879980	5	-0.1309			Loss		0.0816327
16	16p13.3	16p13.3	511780	792452	51	-0.1505	18	CHTF18,MPFL,MSLN,RPUSD1,C16orf14,C16orf24,FBXL16,HAGHL,KIAA1924,METRN,NARFL,RHBDL1,RHOT2,STUB1,WDR24,WDR90,WFIKKN1,RAB40C	Loss		0.0796319
16	16p13.3	16p13.3	1189933	1211711	5	-0.0542			Loss		0.0816327
16	16p13.3	16p13.3	2605126	2680930	9	-0.0372			Loss		0.0612245
16	16p13.2	16p13.2	6854904	6904017	7	-0.0426			Loss		0.0204082
16	16p11.2	16p11.2	29050535	29258332	16	-0.138	2	AK027150,LOC730092	Loss		0.0548469
16	16p11.2	16p11.2	33507497	34160224	16	-0.0344	1	MGC34800,BC012355	Loss		0.0497449
16	16q12.1	16q12.1	46732734	46835540	12	-0.0266	3	ABCC11,ABCC12,BC036378	Loss		0.0408163
16	16q12.1	16q12.1	47610756	50468032	213	-0.0255	20	BC039549,SALL1,ADCY7,AF289584,AL161979,BRD7,CYLD,NKD1,NOD2,PAPD5,SLIC1,C16orf69,HEATR3,TMEM188,AK126710,AK128747,C16orf78,CBLN1,MGC33367,ZNF423	Loss		0.0408163
16	16q12.1	16q22.1	50843158	69397161	1518	-0.0441	198	BC029912,CHD9,LOC283854,TOX3,AKTIP,BX537874,KIAA1005,RBL2,RPGRIP1L,AK096554,CR622027,FTO,AL832088,hCG_1815491,IRX3,IRX5,IRX6,AMFR,NUDT21,OGFOD1,AJ001982,LPCAT2,MMP2,SLC6A2,BC039073,GNAO1,LOC283856,BBS2,HYDIN,FLJ32951,GOT2,BC043241,CDH8,CR936694,AL110259,BC037902,CDH11,LOC283867,AK056142,AK056683,AK130753,BEAN,CDH5,AK097030,CETP,HERPUD1,NLRC5,NOD27,NUP93,SLC12A3,AY459291,MT2A,MT3,MT4,C16orf50,CCDC…	Loss		0.0745879
16	16q22.2	16q23.2	69753919	79028830	771	-0.0466	66	CHST5,LOC348174,LOC388237,AK125450,BC043527,PSMD7,AK124526,BCAR1,FA2H,GLG1,LDHD,LOC146346,MLKL,RFWD3,WDR59,ZFP1,ZNRF1,CFDP1,CHST6,LOC124491,TMEM170,ADAT1,BX648197,FLJ22167,GABARAPL2,KARS,TERF2IP,AK021563,AK095618,AP1G1,AY164485,C16orf47,CALB2,CHST4,DHODH,DHX38,FLJ11171,G49380,HP,HPR,KIAA0174,L32833,LOC283902,LOC645478,LOC729556,MARVELD3,PHLPPL,PMFBP1,TAT,TXNL4B,ZFHX3,ZNF19,ZNF23,ZNF821,AK057218,C…	Loss		0.0817385
16	16q23.2	16q24.3	79953708	88690615	923	-0.047	112	HSD17B2,HSPC105,MPHOSPH6,AK095707,GAN,CDH13,HSBP1,ATP2C2,BX648333,KCNG4,KIAA1609,WFDC1,AK131102,HSDL1,LOC654780,LRRC50,MBTPS1,MLYCD,NECAB2,OKL38,OSGIN1,TAF1C,PLCG2,COTL1,AK125749,AK128193,FBXO31,MAP1LC3B,ZCCHC14,CA5A,AF147365,AK126852,LOC651721,BC100027,FLJ30679,FOXC2,FOXL1,AK091834,BC043250,C16orf74,COX4I1,COX4NB,CR627169,DKFZp434O0320,FOXF1,GINS2,IRF8,LOC146513,LOC283904,LOC729464,AK057887,AK09…	Loss		0.0831141
17	17p13.3	17p11.2	29169	19742136	1991	-0.0761	322	ALDH3A1,ALDH3A2,BX648861,FLJ31196,MFAP4,SLC47A1,SLC47A2,ULK2,ZNF179,B9D1,EPN2,COPS3,FLCN,LOC201164,NT5M,AK127974,FAM106A,FBXW10,FLJ40244,GRAP,LOC220594,PRPSAP2,SLC5A10,TRIM16L,MED9,BC039345,CR597597,LOC96597,M-RIP,TNFRSF13B,AK123100,AK123263,BC017752,C1orf136,CDRT15,COX10,ELAC2,HS3ST3A1,ATPAF2,C17orf39,LRRC48,RAI1,SMCR5,SREBF1,TOM1L2,PEMT,RASD1,C17orf45,C17orf76,CCDC144A,TRPV2,UBB,ZNF287,ZNF624,A…	Loss		0.120009
17	17p11.2	17p11.2	20920637	21119958	23	-0.0376	2	DHRS7B,TMEM11	Loss		0.0514641
17	17p11.2	17p11.2	21627596	22078701	25	-0.0662	3	AK127995,BC039120,CR616400	Loss		0.0595918
17	17q11.1	17q11.2	22593086	24899538	274	0.2671	49	LOC201229,FLJ40504,NLK,PPY2,PYY2,TMEM97,TNFAIP1,KSR1,BC034720,NOS2A,LGALS9,BC045622,SLC13A2,SARM1,SLC46A1,TMEM199,VTN,POLDIP2,BC037740,TAOK1,NEK8,AK130695,C17orf63,ERAL1,RAB34,RPL23A,TLCD1,DHRS13,FLOT2,MYO18A,PHF12,PIPOX,SEZ6,TIAF1,CRYBA1,NUFIP2,PROCA1,TRAF4,FLJ25006,KIAA0100,SDF2,SPAG5,SUPT6H,U43586,WSB1,ALDOC,FOXN1,PIGS,UNC119	Gain	0.204082
17	17q11.2	17q11.2	24055267	24104544	15	-0.03			Loss		0.00312826
17	17q11.2	17q11.2	24924250	24942877	6	-0.0749			Loss		0.0578231
17	17q11.2	17q11.2	24974517	25898839	109	0.2434	8	SSH2,CPD,BLMH,TMIGD,EFCAB5,CCDC55,SLC6A4,GOSR1	Gain	0.117955
17	17q11.2	17q11.2	26023960	26148476	9	0.2736	2	SUZ12,CRLF3	Gain	0.102041
17	17q11.2	17q11.2	26272399	26691653	50	0.3085	4	CENTA2,RNF135,LOC400590,NF1	Gain	0.0530612
17	17q11.2	17q12	27855009	29722692	204	-0.0586	13	BC062794,CCL1,CCL11,CCL13,CCL2,CCL7,CCL8,AY358653,CR617078,MYO1D,SPACA3,TMEM98,ACCN1	Loss		0.0458183
17	17q12	17q12	30706719	30791170	11	-0.0307	4	LOC729839,SLFN11,SLFN12,SLFN13	Loss		0.0408163
17	17q12	17q12	31915303	32176737	25	-0.0294	7	MYO19,PIGW,ZNHIT3,DKFZp564H213,GGNBP2,MGC4172,MRM1	Loss		0.0408163
17	17q12	17q12	32221174	32361049	8	0.2089			Gain	0.0408163
17	17q12	17q12	32761352	33103089	38	0.2317	6	DDX52,AP1GBP1,DUSP14,TADA2L,ACACA,C17orf78	Gain	0.0698174
17	17q12	17q21.2	33262754	35703758	258	0.6619	42	NEUROD2,ERBB2,PERLD1,PNMT,PPP1R1B,STARD3,TCAP,C17orf37,GRB7,CASC3,CRKRS,MED1,FBXL20,AK093715,CACNB1,RPL19,STAC2,PLXDC1,LOC90110,AK125814,LOC642808,LASP1,RPL23,CCDC49,LOC388381,SNIP,PIP4K2B,FBXO47,CISD3,MLLT6,PCGF2,PSMB3,ARHGAP23,GPR179,MRPL45,SOCS7,WIPF2,WIRE,THRA,CDC6,RAPGEFL1,LOC284100	Gain	0.157931
17	17q12	17q12	34031351	34680579	88	-0.0345	19	CISD3,PCGF2,PSMB3,PIP4K2B,MLLT6,AK093715,AK125814,CCDC49,FBXL20,FBXO47,LASP1,LOC388381,LOC642808,LOC90110,PLXDC1,RPL23,CACNB1,RPL19,STAC2	Loss		0.0446132
17	17q21.2	17q21.2	35814521	35992000	25	-0.0344	5	CCR7,CR597260,IGFBP4,TNS4,TOP2A	Loss		0.0612245
17	17q21.2	17q21.31	36045662	39308311	442	-0.0522	119	AK056318,AK094723,AK125965,BC065372,EIF1,GAST,KA21,KRT13,KRT14,KRT15,KRT16,KRT17,KRT19,KRT222P,KRT223P,KRT24,KRT25,KRT25A,KRT25B,KRT25C,KRT27,KRT31,KRT32,KRT33A,KRT33B,KRT34,KRT35,KRT36,KRT37,KRT38,KRT9,KRTAP17-1,KRTAP4-1,KRTAP4-2,KRTAP4-3,KRTAP4-4,KRTAP4-5,KRTAP4-6,KRTAP9-2,KRTAP9-9,SMARCE1,ARL4D,DHX8,KRT10,KRT12,KRT20,KRT23,KRT25D,KRT40,TMEM99,ACLY,AK096415,CNP,DHX58,DNAJC7,GCN5L2,HAP1,HSPB9,KL…	Loss		0.0815865
17	17q21.31	17q21.31	39806330	39848754	8	-0.1227			Loss		0.0408163
17	17q21.31	17q21.31	41278854	41395831	16	-0.0343			Loss		0.0612245
17	17q21.31	17q21.31	41508943	42166911	26	-0.0931	4	NSF,ARL17P1,ARL17,KIAA1267	Loss		0.173469
17	17q21.32	17q22	43689601	48211551	457	0.3211	77	SPAG9,AK025239,HOXB8,AK057253,HOXB1,SKAP1,HOXB2,HOXB3,HOXB4,HOXB7,LOC404266,HOXB9,BC041368,CALCOCO2,TTLL6,TAC4,CA10,XYLT2,BC038560,HOXB13,LOC649482,PRAC,FAM117A,MYST2,ABI3,ATP5G1,B4GALNT2,GIP,GNGT2,IGF2BP1,PHOSPHO1,SNF8,UBE2Z,CR606231,BC034364,MBTD1,NME1,NME2,CROP,BC033456,COL1A1,PPP1R9B,SAMD14,SGCA,TOB1,WFIKKN2,PHB,FLJ40194,DLX3,DLX4,ITGA3,LOC284080,PDK2,C17orf73,ABCC3,AK000454,ANKRD40,CACNA1G,Z…	Gain	0.179208
17	17q22	17q22	48500989	49257577	29	0.2366	1	KIF2B	Gain	0.23012
17	17q23.2	17q23.2	54440892	54738526	40	0.2159	5	C17orf71,GDPD1,PRR11,TRIM37,FAM33A	Gain	0.22449
17	17q23.2	17q23.2	55053550	55354063	43	0.2693	6	TMEM49,RPS6KB1,TUBD1,CLTC,PTRH2,MIRN21	Gain	0.183673
17	17q23.2	17q23.2	55687335	56121906	46	0.2767	7	APPBP2,C17orf64,LOC731851,AK131012,USP32,PPM1D,BCAS3	Gain	0.217835
17	17q23.2	17q23.3	56878925	58354088	125	0.2893	12	TLK2,MARCH10,MRC2,RNF190,BC040294,BC060511,MED13,BRIP1,INTS2,NACA2,TBX4,EFCAB3	Gain	0.216816
17	17q23.3	17q23.3	59088886	59634542	76	0.315	21	SMARCD2,CD79B,CR620501,CSH1,CSH2,CSHL1,GH1,GH2,TCAM1,SCN4A,LIMD2,LYK5,MAP3K3,ERN1,TEX2,AB209878,C17orf72,DDX42,FTSJ3,PSMC5,CCDC47	Gain	0.175081
17	17q23.3	17q24.1	59845229	60196119	35	0.2491	7	CCDC45,DDX5,POLG2,SMURF2,BC053534,C17orf60,LOC646014	Gain	0.149854
17	17q24.1	17q24.2	60615855	61948406	109	0.3926	5	CCDC46,APOH,PRKCA,RGS9,AXIN2	Gain	0.181614
17	17q25.3	17q25.3	74199543	74269935	8	0.2098			Gain	0.0816327
17	17q25.3	17q25.3	75615433	75673174	8	-0.12			Loss		0.0408163
17	17q25.3	17q25.3	77290841	77646444	37	-0.0463	14	SLC25A10,DUS1L,FASN,LRRC45,RAC3,RFNG,STRA13,ARHGDIA,DYSFIP1,P4HB,ASPSCR1,LOC92659,NOTUM,THOC4	Loss		0.115279
17	17q25.3	17q25.3	78389508	78653589	30	-0.0409	3	B3GNTL1,METRNL,TBCD	Loss		0.0612245
18	18p11.32	18p11.32	1009976	1783292	61	-0.0265	3	AK057505,BC040589,C18orf2	Loss		0.0408163
18	18p11.32	18p11.32	1909685	1970846	5	-0.0321			Loss		0.0408163
18	18p11.32	18p11.21	2303398	13045945	957	-0.0255	67	AFG3L2,BX648696,BX649021,C18orf43,CIDEA,TUBB6,AK096548,Cep192,CEP76,PSMG2,PTPN2,SEH1L,SLMO1,SPIRE1,GNAL,IMPA2,LOC729589,MPPE1,AB018345,AK093284,BC050338,C18orf30,C18orf58,FAM38B,KIAA0802,LOC284219,PTPRM,RAB12,ANKRD12,APCDD1,NAPG,NDUFV2,PPP4R1,RAB31,RALBP1,TWSG1,TXNDC2,VAPA,AB037735,AK093324,AK097613,AK098180,ARHGAP28,BC008377,CR627458,DLGAP1,EMILIN2,EPB41L3,FLJ38028,LAMA1,LOC201477,LOC284214,LOC3…	Loss		0.042629
18	18p11.21	18p11.21	13404497	13816094	47	0.2253	4	C18orf1,C18orf19,MC5R,RNMT	Gain	0.0612245
18	18p11.21	18p11.21	13912516	13985855	6	-0.0316			Loss		0.0408163
18	18q11.2	18q11.2	18873543	19143647	27	-0.0285	3	AK093243,C18orf45,CABLES1	Loss		0.0408163
18	18q11.2	18q11.2	20717879	21495726	52	-0.0261	1	ZNF521	Loss		0.0408163
18	18q12.2	18q12.3	31712532	36613779	319	-0.0461	15	AB037749,AK090603,AK128175,BC009735,BC034625,C18orf10,C18orf21,ELP2,KIAA1328,LOC647946,MOCOS,P15RS,SLC39A6,FHOD3,BRUNOL4	Loss		0.044271
18	18q12.3	18q21.1	37278216	46141198	748	-0.0363	45	AY762618,LOC284260,PIK3C3,RIT2,SYT4,AK122698,ATP5A1,BC031271,BC051727,BC062338,C18orf12,CCDC5,HDHD2,KIAA1632,LOC284263,PSTPIP2,SETBP1,SIGLEC15,SLC14A1,SLC14A2,SMAD2,ZBTB7C,BX647229,C18orf25,KATNAL2,LOC147343,LOXHD1,PIAS2,RNF165,ST8SIA5,CD33L3,BC040860,IER3IP1,AB032945,ACAA2,C18orf32,CCDC11,CXXC1,DYM,LIPG,MBD1,MYO5B,CR621005,SMAD7,KIAA0427	Loss		0.0524119
18	18q21.1	18q21.2	47019710	49183131	163	-0.026	2	DCC,AK094936	Loss		0.0408163
18	18q21.2	18q21.2	50015146	50092031	12	-0.027	2	POLI,STARD6	Loss		0.0408163
18	18q21.33	18q23	59630935	76111023	1144	-0.0804	68	C18orf20,CDH7,LOC284294,SERPINB10,SERPINB2,SERPINB8,AK091108,AL831865,AY262164,BC038762,BC053410,BC071801,BX648957,C18orf55,CBLN2,CCDC102B,CD226,CDH19,CR749520,DOK6,DSEL,FBXO15,LOC400655,NETO1,TXNDC10,ADNP2,AK056288,BC016792,BC032908,BC037384,C18orf33,C18orf51,C18orf57,C18orf62,CNDP1,CNDP2,CR749350,CYB5A,FLJ37638,FLJ44313,FLJ44881,GALR1,LOC147299,LOC284276,LOC339298,LOC400657,LOC645321,PARD6G,SAL…	Loss		0.071821
19	19p13.3	19p13.3	64418	4490334	566	-0.0625	138	HDGF2,LSDP5,SEMA6B,UBXD1,ANKRD24,APBA3,ATCAY,BC014884,CCDC94,CHAF1A,CREB3L3,DAPK3,EBI3,EEF2,FSD1,ITGB1BP3,KIAA1086,LOC388494,MAP2K2,MATK,MGC23244,MPND,MRPL54,PIAS4,RAX2,SH3GL1,SHD,SIRT6,STAP2,ZBTB7A,BRUNOL5,EDG6,GNA15,NCLN,TJP3,AES,C19orf35,DIRAS1,GADD45B,GNA11,GNG7,LMNB2,LSM7,OAZ1,SGTA,SLC39A3,SPPL2B,THOP1,TIMM13,TLE2,TLE6,TMPRSS9,ZNF554,ZNF555,ZNF556,ZNF57,ZNF77,AP3D1,ATP8B3,BTBD2,DOT1L,FAM108A…	Loss		0.0943607
19	19p13.2	19p13.2	12361400	12403699	5	-0.0594	2	BC057831,ZNF443	Loss		0.0408163
19	19p13.12	19p13.12	14154925	14468856	27	-0.0287	7	BC011648,CD97,DDX39,GIPC1,LPHN1,PKN1,PTGER1	Loss		0.0408163
19	19p12	19p12	20422576	20493460	5	-0.069			Loss		0.0612245
19	19p12	19p12	23416568	23834895	34	-0.0317	5	AK124278,BC032394,LOC388524,ZNF675,ZNF681	Loss		0.0408163
19	19q12	19q12	34743425	35188111	44	0.4321	6	CCNE1,BC026184,C19orf2,C19orf12,PLEKHF1,POP4	Gain	0.0746753
19	19q13.2	19q13.2	46476230	46553274	12	-0.0276			Loss		0.0408163
19	19q13.31	19q13.31	48381811	48673229	24	-0.0254	6	CD177,PLAC7,PSG4,TEX101,LYPD3,PHLDB3	Loss		0.0408163
19	19q13.31	19q13.32	49980503	50610137	90	-0.0346	26	BCAM,BLOC1S3,CBLC,CKM,EXOC3L2,GEMIN7,LOC284352,MARK4,NKPD1,RELB,SFRS16,TRAPPC6A,XTP7,ZNF342,CD3EAP,ERCC1,ERCC2,KLC3,PPP1R13L,APOC1,APOC2,APOC4,APOE,CLPTM1,PVRL2,TOMM40	Loss		0.0612245
19	19q13.42	19q13.42	60251694	60302989	11	-0.0293			Loss		0.0408163
19	19q13.43	19q13.43	63505742	63784382	52	-0.0445	22	AK096040,BC029960,BX649129,CHMP2A,FLJ39005,LOC116412,MGC2752,RPS5,SLC27A5,TRIM28,UBE2M,ZNF132,ZNF324,ZNF324B,ZNF446,ZNF497,ZNF499,ZNF584,A1BG,AL832049,HKR2,ZSCAN22	Loss		0.0816327
20	20p12.1	20p12.1	14747098	14807636	7	-0.1314			Loss		0.0204082
20	20q13.2	20q13.2	50274935	50824671	23	0.2184	1	BC045652	Gain	0.134871
20	20q13.2	20q13.2	51108301	51648672	61	0.2302	5	TSHZ2,RP4-724E16.2,ZNF217,LOC728805,AK056432	Gain	0.142857
20	20q13.2	20q13.2	51941866	52938182	74	0.2228	4	BCAS1,CYP24A1,PFDN4,DOK5	Gain	0.123552
20	20q13.32	20q13.32	56199045	56327738	16	0.2449	4	PPP4R1L,RAB22A,AK024545,C20orf86	Gain	0.0931122
20	20q13.32	20q13.32	56654705	56818963	19	0.2474	3	AB209296,NPEPL1,STX16	Gain	0.0816327
20	20q13.33	20q13.33	57757258	58296748	57	0.2224	8	C20orf197,CDH26,LOC284757,PHACTR3,SYCP2,AL137442,C20orf177,PPP1R3D	Gain	0.0855711
20	20q13.33	20q13.33	58883662	58971442	7	0.2325			Gain	0.102041
20	20q13.33	20q13.33	62250909	62379118	16	0.2161	4	BC062313,MYT1,BC032332,PCMTD2	Gain	0.102041
21	21p11.2	21p11.1	9896630	10154824	22	-0.0551	3	BAGE2,BC090878,TPTE	Loss		0.0946197
21	21q21.1	21q21.1	15346772	16060225	35	-0.026	2	NRIP1,USP25	Loss		0.0437318
21	21q22.13	21q22.13	37313723	37511690	29	-0.0274	4	DSCR6,DSCR9,PIGP,TTC3	Loss		0.0408163
21	21q22.2	21q22.2	40520958	41158945	92	-0.0454	1	DSCAM	Loss		0.0204082
21	21q22.3	21q22.3	43548960	43632354	15	-0.0522	2	CR609588,FLJ41733	Loss		0.0244898
22	22q11.1	22q13.33	15433500	49509153	4102	-0.066	536	AK127991,GSTT1,GSTTP1,DDT,KIAA0376,SPECC1L,CABIN1,AK123996,GSTT2,RTN4R,X91348,CTA-126B4.3,PI4KA,PIK4CA,SMARCB1,FLJ32575,LOC284865,AB210002,CRKL,SERPIND1,SNAP29,BC035867,MED15,PCQAP,TMEM191A,GP1BB,TBX1,YPEL1,MAPK1,AJ583822,KLHL22,SCARF2,ZNF74,DGCR5,PRODH,BC042456,C22orf28,FBXO7,SYN3,RBM9,AB002313,APOL3,MAPK11,MAPK12,PLXNB2,AIFL,AIFM3,CR597525,FLJ42953,GGT1,LOC400891,LZTR1,MGC16703,P2RXL1,THAP7,BX6…	Loss		0.108145
* In each region, genes are ordered by decreasing absolute value of the Gistic score
