# Supplementary material for: High-Resolution Comparative Genomic Hybridization of Inflammatory Breast Cancer and Identification of Candidate Genes
Source: PLoS One. 2011 Feb 9;6(2):e16950. doi: 10.1371/journal.pone.0016950 (PMC3037286; doi:10.1371/journal.pone.0016950)
Supplement: Table S4 — Genes with high level CNAs in IBCs and/or nIBCs. (XLS) [file pone.0016950.s008.xls]

## Sheet: Table S4
Table S4: Genes with high level CNAs in IBCs and/or nIBCs
							Amplification frequencies		Deletion frequencies
ProbeName	Chr Name	Cytoband	Start	Stop	Symbol	Name	IBC	nIBC	IBC	nIBC
A_16_P15000916	1	chr1p36.33	604287	604346	AK026901	CDNA clone IMAGE:5268125	0	0	0.0408163	0.0241935
A_16_P15001074	1	chr1p36.33	689581	689640	LOC400723	hypothetical LOC400723	0	0	0.0408163	0.016129
A_16_P00000017	1	chr1_p36.33	796956	797005	FLJ22639	hypothetical protein FLJ22639	0	0	0.0612245	0.0241935
A_16_P00000027	1	chr1_p36.33	834458	834517	LOC643837	hypothetical protein LOC643837	0	0	0.0612245	0.0241935
A_16_P35001586	1	chr1_p36.33	850905	850949	BC047940		0	0	0.0612245	0.0241935
A_16_P00000060	1	chr1_p36.33	886543	886598	LOC284600	hypothetical protein LOC284600	0	0	0.0612245	0.0483871
A_16_P15001594	1	chr1_p36.33	892726	892785	FLJ39609	Hypothetical protein FLJ39609	0	0	0.0612245	0.0483871
A_16_P00000099	1	chr1_p36.33	907406	907465	SAMD11	sterile alpha motif domain containing 11	0	0	0.0612245	0.0483871
A_16_P00000140	1	chr1_p36.33	934659	934703	NOC2L	nucleolar complex associated 2 homolog (S. cerevisiae)	0	0	0.0612245	0.0241935
A_16_P15001756	1	chr1_p36.33	939315	939363	KLHL17	kelch-like 17 (Drosophila)	0	0	0.0612245	0.0241935
A_16_P00000173	1	chr1_p36.33	950081	950128	PLEKHN1	pleckstrin homology domain containing, family N member 1	0	0	0.0612245	0.0241935
A_16_P15001830	1	chr1_p36.33	964730	964780	BX648399		0	0	0.0612245	0.0241935
A_16_P00000195	1	chr1_p36.33	971551	971610	HES4	hairy and enhancer of split 4 (Drosophila)	0	0	0.0612245	0.0241935
A_16_P15001886	1	chr1_p36.33	988528	988586	ISG15	ISG15 ubiquitin-like modifier	0	0	0.0612245	0.0241935
A_16_P15002009	1	chr1_p36.33	1026414	1026458	AGRN	agrin	0	0	0.0612245	0.0241935
A_14_P139527	1	chr1_p36.33	1089934	1089993	C1orf159	chromosome 1 open reading frame 159	0	0	0.0612245	0.0241935
A_16_P15002253	1	chr1_p36.33	1116011	1116057	LOC254099	hypothetical protein LOC254099	0	0	0.0612245	0.0241935
A_16_P15002406	1	chr1_p36.33	1171798	1171842	TTLL10	tubulin tyrosine ligase-like family, member 10	0	0	0.0612245	0.0241935
A_16_P15002418	1	chr1_p36.33	1175190	1175242	TNFRSF18	tumor necrosis factor receptor superfamily, member 18	0	0	0.0612245	0.0241935
A_16_P00000486	1	chr1_p36.33	1185832	1185883	TNFRSF4	tumor necrosis factor receptor superfamily, member 4	0	0	0.0612245	0.0241935
A_14_P107170	1	chr1_p36.33	1206074	1206119	SDF4	stromal cell derived factor 4	0	0	0.0612245	0.0241935
A_16_P15002534	1	chr1_p36.33	1210241	1210300	B3GALT6	UDP-Gal:betaGal beta 1,3-galactosyltransferase polypeptide 6	0	0	0.0612245	0.0241935
A_16_P00000587	1	chr1_p36.33	1246807	1246861	UBE2J2	ubiquitin-conjugating enzyme E2, J2 (UBC6 homolog, yeast)	0	0	0.0612245	0.0241935
A_16_P15002665	1	chr1_p36.33	1250923	1250967	MIB2	Mindbomb homolog 2 (Drosophila)	0	0	0.0612245	0.0241935
A_16_P00000610	1	chr1_p36.33	1266212	1266256	SCNN1D	sodium channel, nonvoltage-gated 1, delta	0	0	0.0612245	0.0241935
A_16_P00000669	1	chr1_p36.33	1330569	1330613	MMP23B	matrix metallopeptidase 23B	0	0	0.0612245	0.0241935
A_16_P35003440	1	chr1_p36.33	1441599	1441643	hCG_20426	hCG20426	0	0	0.0612245	0.0241935
A_16_P35003742	1	chr1_p36.33	1549737	1549781	ATAD3A	ATPase family, AAA domain containing 3A	0	0	0.0612245	0.0241935
A_14_P136289	1	chr1_p36.33	1590570	1590629	SSU72	SSU72 RNA polymerase II CTD phosphatase homolog (S. cerevisiae)	0	0	0.0612245	0.0241935
A_16_P35003882	1	chr1_p36.33	1595891	1595942	AF161351	HSPC088	0	0	0.0612245	0.0241935
A_16_P00000754	1	chr1_p36.33	1686141	1686200	CDC2L2	cell division cycle 2-like 2 (PITSLRE proteins)	0	0	0.0612245	0.0241935
A_16_P15003630	1	chr1_p36.33	1738295	1738354	NADK	NAD kinase	0	0	0.0408163	0.016129
A_14_P127224	1	chr1_p36.33	1852687	1852746	GNB1	guanine nucleotide binding protein (G protein), beta polypeptide 1	0	0	0	0.00806452
A_16_P00000933	1	chr1_p36.33	1875511	1875570	CALML6	calmodulin-like 6	0	0	0	0.00806452
A_16_P00000942	1	chr1_p36.33	1881181	1881239	TMEM52	transmembrane protein 52	0	0	0	0.00806452
A_16_P00000956	1	chr1_p36.33	1889506	1889555	LOC339457	hypothetical protein LOC339457	0	0	0	0.00806452
A_16_P15004152	1	chr1_p36.33	1948751	1948810	KIAA1751	KIAA1751	0	0	0	0.00806452
A_16_P00001037	1	chr1_p36.33	1963029	1963088	AK127388		0	0	0	0.00806452
A_16_P35004752	1	chr1_p36.33	1978281	1978340	AK054708	CDNA FLJ30146 fis, clone BRACE2000256	0	0	0	0.00806452
A_16_P15004237	1	chr1_p36.33	1990927	1990984	GABRD	gamma-aminobutyric acid (GABA) A receptor, delta	0	0	0	0.00806452
A_14_P111876	1	chr1_p36.33	2145395	2145454	PRKCZ	protein kinase C, zeta	0	0	0	0.00806452
A_16_P00001341	1	chr1_p36.33	2165653	2165703	C1orf86	Chromosome 1 open reading frame 86	0	0	0	0.00806452
A_14_P136313	1	chr1_p36.33	2176275	2176320	FLJ14100	hypothetical protein FLJ14100	0	0	0	0.00806452
A_14_P104756	1	chr1_p36.33	2270694	2270753	SKI	v-ski sarcoma viral oncogene homolog (avian)	0	0	0	0.00806452
A_16_P00001630	1	chr1_p36.33	2353557	2353616	MORN1	MORN repeat containing 1	0	0	0	0.00806452
A_16_P00001649	1	chr1_p36.32	2364229	2364288	RER1	RER1 retention in endoplasmic reticulum 1 homolog (S. cerevisiae)	0	0	0	0.00806452
A_14_P132953	1	chr1_p36.32	2371840	2371899	PEX10	peroxisome biogenesis factor 10	0	0	0	0.00806452
A_16_P15005566	1	chr1_p36.32	2436528	2436580	AK122591		0	0	0	0.00806452
A_14_P116207	1	chr1_p36.32	2469093	2469152	PLCH2		0	0	0	0.00806452
A_14_P132328	1	chr1_p36.32	2488099	2488158	PANK4	pantothenate kinase 4	0	0	0	0.00806452
A_16_P00001928	1	chr1_p36.32	2517795	2517839	LOC115110	hypothetical protein LOC115110	0	0	0	0.00806452
A_14_P130946	1	chr1_p36.32	2521526	2521583	TNFRSF14	tumor necrosis factor receptor superfamily, member 14 (herpesvirus entry mediator)	0	0	0	0.00806452
A_16_P00001953	1	chr1_p36.32	2539127	2539183	AK128532		0	0	0	0.00806452
A_14_P105255	1	chr1_p36.32	2553567	2553612	C1orf93	chromosome 1 open reading frame 93	0	0	0	0.00806452
A_16_P00002011	1	chr1_p36.32	2591016	2591075	MMEL1	membrane metallo-endopeptidase-like 1	0	0	0	0.00806452
A_16_P00002022	1	chr1_p36.32	2599935	2599994	LOC284630	hypothetical protein LOC284630	0	0	0	0.00806452
A_16_P15006922	1	chr1_p36.32	2926305	2926364	TLR5	toll-like receptor 5	0	0	0	0.00806452
A_14_P122615	1	chr1_p36.32	2961144	2961190	ACTRT2	actin-related protein T2	0	0	0	0.00806452
A_14_P107123	1	chr1_p36.32	2999576	2999635	FLJ42875	FLJ42875 protein	0	0	0	0.00806452
A_16_P15007634	1	chr1_p36.32	3149648	3149707	PRDM16	PR domain containing 16	0	0	0.0204082	0.0241935
A_16_P00003269	1	chr1_p36.32	3399732	3399791	CR609468		0	0	0	0.00806452
A_16_P35009289	1	chr1_p36.32	3420807	3420866	ARHGEF16	Rho guanine exchange factor (GEF) 16	0	0	0	0.00806452
A_16_P00003531	1	chr1_p36.32	3541765	3541821	MEGF6	multiple EGF-like-domains 6	0	0	0	0.00806452
A_14_P124818	1	chr1_p36.32	3569810	3569868	FAM79A	family with sequence similarity 79, member A	0	0	0	0.00806452
A_14_P110285	1	chr1_p36.32	3585455	3585514	WDR8	WD repeat domain 8	0	0	0	0.00806452
A_16_P00003755	1	chr1_p36.32	3671169	3671223	TP73	tumor protein p73	0	0	0	0.00806452
A_16_P00003777	1	chr1_p36.32	3683208	3683267	KIAA0495	KIAA0495	0	0	0	0.00806452
A_16_P00003817	1	chr1_p36.32	3711097	3711155	CCDC27	coiled-coil domain containing 27	0	0	0	0.00806452
A_14_P107069	1	chr1_p36.32	3732467	3732526	LRRC47	leucine rich repeat containing 47	0	0	0	0.00806452
A_14_P104791	1	chr1_p36.32	3752850	3752909	KIAA0562	KIAA0562	0	0	0	0.00806452
A_14_P111191	1	chr1_p36.13	16088917	16088964	HSPB7	heat shock 27kDa protein family, member 7 (cardiovascular)	0	0	0.0408163	0.016129
A_14_P110994	1	chr1_p36.13	16099944	16099989	CLCNKA	chloride channel Ka	0	0	0.0408163	0.016129
A_16_P15038968	1	chr1_p36.13	16115508	16115557	CLCNKB	chloride channel Kb	0	0	0.0204082	0.00806452
A_14_P139164	1	chr1_p36.13	16531740	16531799	NECAP2	NECAP endocytosis associated 2	0	0	0.0204082	0
A_14_P201857	1	chr1_p36.13	16551324	16551383	CROCCL2	ciliary rootlet coiled-coil, rootletin-like 2	0	0	0.0204082	0
A_16_P00020708	1	chr1_p36.13	16577444	16577490	AK130020	CDNA clone IMAGE:4994693	0	0	0.0204082	0
A_16_P15040292	1	chr1_p36.13	16672053	16672112	NBPF1	neuroblastoma breakpoint family, member 1	0	0	0.0204082	0
A_16_P35042778	1	chr1_p36.13	16680432	16680476	PDZK1P1	PDZ domain containing 1 pseudogene 1	0	0	0.0204082	0
A_14_P114287	1	chr1_p36.13	16693433	16693483	CROCCL1	ciliary rootlet coiled-coil, rootletin-like 1	0	0	0.0204082	0
A_16_P15040576	1	chr1_p36.13	16773245	16773289	ESPNP	espin pseudogene	0	0	0.0408163	0.00806452
A_16_P00020797	1	chr1_p36.13	16961423	16961467	LOC729604	hypothetical protein LOC729604	0	0	0.0204082	0
A_16_P15041092	1	chr1_p36.13	17021311	17021370	CROCC	ciliary rootlet coiled-coil, rootletin	0	0	0.0204082	0.00806452
A_14_P101297	1	chr1_p36.13	17048692	17048751	MFAP2	microfibrillar-associated protein 2	0	0	0.0204082	0
A_16_P15041204	1	chr1_p36.13	17062626	17062672	ATP13A2	ATPase type 13A2	0	0	0.0204082	0
A_16_P35045555	1	chr1_p36.13	17769648	17769707	ARHGEF10L		0	0	0	0.00806452
A_14_P131007	1	chr1_p36.13	18802856	18802915	PAX7	paired box 7	0	0	0	0.00806452
A_16_P00023415	1	chr1_p36.13	18819125	18819184	LOC284530	hypothetical protein LOC284530	0	0	0	0.00806452
A_14_P120178	1	chr1_p36.11	25318800	25318845	C1orf63	chromosome 1 open reading frame 63	0	0	0	0.00806452
A_16_P35064816	1	chr1_p36.11	25393574	25393633	RHD	Rh blood group, D antigen	0	0	0.0204082	0.0403226
A_16_P00032101	1	chr1_p36.11	25402278	25402337	BC041843	CDNA FLJ13712 fis, clone PLACE2000394	0	0	0.0204082	0.0403226
A_16_P00032102	1	chr1_p36.11	25408815	25408867	TMEM50A	transmembrane protein 50A	0	0	0	0.016129
A_14_P100078	1	chr1_p34.2	42773691	42773750	AL832217		0	0.00806452	0	0
A_16_P00053974	1	chr1_p34.2	42814707	42814766	PPIH	peptidylprolyl isomerase H (cyclophilin H)	0	0.00806452	0	0
A_14_P117144	1	chr1_p34.2	42832675	42832734	YBX1	Y box binding protein 1	0	0.00806452	0	0
A_14_P108121	1	chr1_p33	47613762	47613806	FOXE3	forkhead box E3	0	0	0	0.00806452
A_16_P15110377	1	chr1_p33	47935691	47935750	LOC284542	hypothetical protein LOC284542	0	0	0	0.00806452
A_14_P104462	1	chr1_p33	47975468	47975527	LOC388630	similar to C05G5.5	0	0	0	0.00806452
A_14_P139636	1	chr1_p33	50196378	50196437	AGBL4	ATP/GTP binding protein-like 4	0	0.00806452	0	0
A_14_P109578	1	chr1_p33	50281661	50281709	CR595508		0	0.00806452	0	0
A_14_P120888	1	chr1_p33	50378959	50379018	ELAVL4	ELAV (embryonic lethal, abnormal vision, Drosophila)-like 4 (Hu antigen D)	0	0.00806452	0	0
A_16_P35122844	1	chr1_p32.3	50590081	50590135	DMRTA2	DMRT-like family A2	0	0.00806452	0	0
A_14_P102048	1	chr1_p32.3	51133981	51134040	FAF1	Fas (TNFRSF6) associated factor 1	0	0.00806452	0	0
A_14_P200978	1	chr1_p32.3	51149651	51149710	CDKN2C	cyclin-dependent kinase inhibitor 2C (p18, inhibits CDK4)	0	0.00806452	0	0
A_16_P35124314	1	chr1_p32.3	51308987	51309046	AK130995		0	0.00806452	0	0
A_16_P15117546	1	chr1_p32.3	51401581	51401640	AK127900		0	0.00806452	0	0
A_16_P15117636	1	chr1_p32.3	51443324	51443383	RNF11	ring finger protein 11	0	0.00806452	0	0
A_16_P00064445	1	chr1_p32.3	51506853	51506906	C1orf34	chromosome 1 open reading frame 34	0	0.00806452	0	0
A_16_P00064457	1	chr1_p32.3	51519414	51519473	AF007170		0	0.00806452	0	0
A_16_P15118016	1	chr1_p32.3	51599432	51599491	EPS15	epidermal growth factor receptor pathway substrate 15	0	0.00806452	0	0
A_14_P106618	1	chr1_p32.3	53642491	53642541	DMRTB1	DMRT-like family B with proline-rich C-terminal, 1	0	0	0	0.00806452
A_16_P00067227	1	chr1_p32.3	53723458	53723517	GLIS1	GLIS family zinc finger 1	0	0	0	0.00806452
A_14_P122924	1	chr1_p32.3	54066595	54066644	YIPF1	Yip1 domain family, member 1	0	0.00806452	0	0
A_14_P124846	1	chr1_p32.3	54088698	54088757	DIO1	deiodinase, iodothyronine, type I	0	0.00806452	0	0
A_14_P116683	1	chr1_p32.3	54121685	54121744	C1orf41	chromosome 1 open reading frame 41	0	0.00806452	0	0
A_16_P35130963	1	chr1_p32.3	54145544	54145603	LRRC42	leucine rich repeat containing 42	0	0.00806452	0	0
A_16_P00067869	1	chr1_p32.3	54194689	54194748	LDLRAD1		0	0.00806452	0	0
A_14_P123201	1	chr1_p32.3	54224935	54224994	TMEM59	transmembrane protein 59	0	0.00806452	0	0
A_14_P114757	1	chr1_p32.3	54289685	54289744	C1orf83	chromosome 1 open reading frame 83	0	0.00806452	0	0
A_16_P00068069	1	chr1_p32.3	54331267	54331326	CDCP2		0	0.00806452	0	0
A_16_P35131425	1	chr1_p32.3	54347293	54347352	AK122760		0	0.00806452	0	0
A_16_P00068131	1	chr1_p32.3	54372568	54372627	LOC606495	hypothetical protein LOC606495	0	0.00806452	0	0
A_16_P15124241	1	chr1_p32.3	54395774	54395833	MRPL37	mitochondrial ribosomal protein L37	0	0.00806452	0	0
A_14_P101577	1	chr1_p32.3	54581244	54581303	SSBP3	single stranded DNA binding protein 3	0	0.00806452	0	0
A_16_P35132688	1	chr1_p32.3	54815600	54815659	ACOT11	acyl-CoA thioesterase 11	0	0.00806452	0	0
A_16_P00068892	1	chr1_p32.3	54881760	54881819	C1orf175		0	0.00806452	0	0
A_16_P15125536	1	chr1_p32.3	54918949	54919008	TTC4	tetratricopeptide repeat domain 4	0	0.00806452	0	0
A_14_P123468	1	chr1_p32.3	54934593	54934652	PARS2	prolyl-tRNA synthetase 2, mitochondrial (putative)	0	0.00806452	0	0
A_16_P00069025	1	chr1_p32.3	54972122	54972181	TTC22	tetratricopeptide repeat domain 22	0	0.00806452	0	0
A_16_P15125764	1	chr1_p32.3	55012049	55012108	C1orf177	chromosome 1 open reading frame 177	0	0.00806452	0	0
A_16_P00069128	1	chr1_p32.3	55062154	55062211	DHCR24	24-dehydrocholesterol reductase	0	0.00806452	0	0
A_16_P00069221	1	chr1_p32.3	55169151	55169205	TMEM61		0	0.00806452	0	0
A_16_P00069244	1	chr1_p32.3	55184389	55184446	BSND	Bartter syndrome, infantile, with sensorineural deafness (Barttin)	0	0.00806452	0	0
A_16_P15126201	1	chr1_p32.3	55242413	55242472	PCSK9		0	0.00806452	0	0
A_16_P15126442	1	chr1_p32.3	55323795	55323854	USP24	ubiquitin specific peptidase 24	0	0.00806452	0	0
A_16_P15126605	1	chr1_p32.3	55388491	55388550	LOC148987	hypothetical protein LOC148987	0	0.00806452	0	0
A_16_P00069758	1	chr1_p32.3	55523339	55523398	LOC645538	similar to Aspartate aminotransferase, mitochondrial precursor (Transaminase A) (Glutamate oxaloacetate transaminase 2)	0	0.00806452	0	0
A_16_P00070273	1	chr1_p32.3	55905281	55905340	FLJ45337		0	0.00806452	0	0
A_16_P35136335	1	chr1_p32.2	56382530	56382589	LOC127406	similar to laminin receptor 1 (ribosomal protein SA)	0	0.00806452	0	0
A_16_P15129757	1	chr1_p32.2	56753755	56753814	PPAP2B	phosphatidic acid phosphatase type 2B	0	0.00806452	0	0
A_16_P35137589	1	chr1_p32.2	56891252	56891311	PRKAA2	protein kinase, AMP-activated, alpha 2 catalytic subunit	0	0.00806452	0	0
A_16_P15130292	1	chr1_p32.2	56981783	56981842	C1orf168	chromosome 1 open reading frame 168	0	0.00806452	0	0
A_14_P137374	1	chr1_p32.2	57095535	57095594	C8A	complement component 8, alpha polypeptide	0	0.00806452	0	0
A_16_P15130718	1	chr1_p32.2	57137861	57137920	C8B	complement component 8, beta polypeptide	0	0.00806452	0	0
A_16_P00073008	1	chr1_p32.2	57749305	57749361	DAB1	CDNA FLJ13320 fis, clone OVARC1001611	0	0.00806452	0	0
A_16_P15137736	1	chr1_p32.1	59938549	59938608	FLJ10986	hypothetical protein FLJ10986	0	0.00806452	0	0
A_16_P35145423	1	chr1_p32.1	59962323	59962382	BC042048	Homo sapiens, clone IMAGE:5547568, mRNA	0	0.00806452	0	0
A_16_P00076331	1	chr1_p32.1	60048731	60048790	HOOK1	hook homolog 1 (Drosophila)	0	0.00806452	0	0
A_14_P102838	1	chr1_p32.1	60103734	60103793	CYP2J2	cytochrome P450, family 2, subfamily J, polypeptide 2	0	0.00806452	0	0
A_14_P201343	1	chr1_p31.3	60250330	60250389	C1orf87	chromosome 1 open reading frame 87	0	0.00806452	0	0
A_16_P35147372	1	chr1_p31.3	60814693	60814752	AF279783		0	0.00806452	0	0
A_16_P15140105	1	chr1_p31.3	60994834	60994893	AK097193		0	0.00806452	0	0
A_14_P128557	1	chr1_p31.3	61129209	61129268	BC030753	CDNA clone IMAGE:4796864	0	0.00806452	0	0
A_14_P121154	1	chr1_p31.3	61633481	61633540	NFIA	Nuclear factor I/A	0	0.00806452	0	0
A_16_P00079019	1	chr1_p31.3	61831724	61831783	MGC34796	SPR pseudogene	0	0.00806452	0	0
A_16_P15142570	1	chr1_p31.3	61861175	61861234	TM2D1	TM2 domain containing 1	0	0.00806452	0	0
A_16_P15143592	1	chr1_p31.3	62284261	62284320	INADL	InaD-like (Drosophila)	0	0.00806452	0.0204082	0
A_14_P116003	1	chr1_p31.3	62388203	62388261	L1TD1	LINE-1 type transposase domain containing 1	0	0.00806452	0	0.00806452
A_16_P15144049	1	chr1_p31.3	62484017	62484076	ANKRD38		0	0.00806452	0	0.00806452
A_14_P201788	1	chr1_p31.3	62628562	62628621	USP1	ubiquitin specific peptidase 1	0	0.00806452	0	0
A_16_P15144520	1	chr1_p31.3	62691059	62691118	DOCK7	dedicator of cytokinesis 7	0	0.00806452	0	0
A_14_P114777	1	chr1_p31.1	77384327	77384386	PIGK	phosphatidylinositol glycan anchor biosynthesis, class K	0	0	0	0.00806452
A_16_P15210133	1	chr1_p22.2	90205801	90205860	ZNF326	zinc finger protein 326	0	0	0	0.00806452
A_16_P15211717	1	chr1_p22.2	90893620	90893679	BARHL2		0	0	0	0.00806452
A_16_P15212073	1	chr1_p22.2	91023617	91023676	LOC149351	hypothetical protein LOC149351	0	0	0	0.00806452
A_14_P125544	1	chr1_p22.2	91195685	91195744	ZNF644	zinc finger protein 644	0	0	0	0.00806452
A_16_P15212851	1	chr1_p22.2	91438354	91438413	HFM1	HFM1, ATP-dependent DNA helicase homolog (S. cerevisiae)	0	0	0	0.00806452
A_16_P00120872	1	chr1_p22.2	91500538	91500597	SEC63D1		0	0	0	0.00806452
A_16_P15245300	1	chr1_p21.1	105862024	105862083	BC043293		0	0	0	0.00806452
A_14_P109623	1	chr1_p13.3	109994285	109994337	GSTM3	glutathione S-transferase M3 (brain)	0	0	0	0.00806452
A_14_P201862	1	chr1_p13.3	110017752	110017811	EPS8L3	EPS8-like 3	0	0	0	0.016129
A_16_P15271995	1	chr1_p13.1	117349924	117349983	TTF2	transcription termination factor, RNA polymerase II	0	0.00806452	0	0
A_14_P107870	1	chr1_p13.1	117371233	117371292	TRIM45	tripartite motif-containing 45	0	0.00806452	0	0
A_16_P15272295	1	chr1_p13.1	117463462	117463521	VTCN1	V-set domain containing T cell activation inhibitor 1	0.0204082	0.00806452	0	0
A_14_P129313	1	chr1_p12	117777733	117777792	MAN1A2	mannosidase, alpha, class 1A, member 2	0.0204082	0.00806452	0	0
A_14_P131839	1	chr1_p12	117880787	117880846	FAM46C	family with sequence similarity 46, member C	0.0204082	0.00806452	0	0
A_14_P118175	1	chr1_p12	118181954	118182013	GDAP2	ganglioside induced differentiation associated protein 2	0.0204082	0.00806452	0	0
A_14_P201561	1	chr1_p12	118214372	118214431	WDR3	WD repeat domain 3	0.0204082	0.00806452	0	0
A_16_P15274558	1	chr1_p12	118438563	118438622	SPAG17	sperm associated antigen 17	0.0204082	0.00806452	0	0
A_16_P00157519	1	chr1_p12	119240603	119240662	TBX15	T-box 15	0	0.00806452	0	0
A_16_P00158752	1	chr1_p12	120138402	120138461	AL833369		0	0.00806452	0	0
A_14_P116252	1	chr1_p12	120148459	120148518	ADAM30	ADAM metallopeptidase domain 30	0	0.00806452	0	0
A_16_P00158945	1	chr1_p12	120313797	120313856	NOTCH2	Notch homolog 2 (Drosophila)	0	0.00806452	0	0
A_16_P15279122	1	chr1_p11.2	120405944	120406003	AK022804	---	0	0.00806452	0	0
A_16_P00158971	1	chr1_p11.2	120718978	120719037	AK127439		0	0.00806452	0	0
A_14_P137169	1	chr1_q21.1	142929291	142929350	TXNIP	thioredoxin interacting protein	0	0.016129	0	0
A_16_P00159675	1	chr1_q21.1	142955707	142955766	POLR3GL	polymerase (RNA) III (DNA directed) polypeptide G (32kD)-like	0	0.016129	0	0
A_16_P35294813	1	chr1_q21.1	142962986	142963032	ANKRD34A	ankyrin repeat domain 34A	0	0.016129	0	0
A_16_P35294963	1	chr1_q21.1	143014215	143014274	LIX1L	Lix1 homolog (mouse)-like	0	0.016129	0	0
A_16_P15283310	1	chr1_q21.1	143032896	143032955	ITGA10	integrin, alpha 10	0	0.016129	0	0
A_14_P100205	1	chr1_q21.1	143057538	143057597	ANKRD35		0	0.016129	0	0
A_14_P129358	1	chr1_q21.1	143072927	143072982	PIAS3	protein inhibitor of activated STAT, 3	0	0.016129	0	0
A_16_P00159877	1	chr1_q21.1	143076162	143076219	NUDT17	nudix (nucleoside diphosphate linked moiety X)-type motif 17	0	0.016129	0	0
A_14_P122217	1	chr1_q21.1	143098216	143098271	POLR3C	polymerase (RNA) III (DNA directed) polypeptide C (62kD)	0	0.00806452	0	0
A_16_P00159977	1	chr1_q21.1	143176008	143176067	ZNF364	zinc finger protein 364	0.0204082	0.00806452	0	0
A_16_P00160006	1	chr1_q21.1	143193151	143193208	CD160	CD160 molecule	0.0204082	0.00806452	0	0
A_14_P200637	1	chr1_q21.1	143236258	143236313	PDZK1	PDZ domain containing 1	0.0204082	0.00806452	0	0
A_16_P00160110	1	chr1_q21.1	143551076	143551133	NBPF11	neuroblastoma breakpoint family, member 11	0	0.00806452	0	0
A_16_P35296804	1	chr1_q21.1	143834763	143834822	AF419616		0	0.016129	0	0
A_14_P134571	1	chr1_q21.1	143866417	143866476	PRKAB2	protein kinase, AMP-activated, beta 2 non-catalytic subunit	0	0.016129	0	0
A_14_P123325	1	chr1_q21.1	143897646	143897702	CHD1L	Chromodomain helicase DNA binding protein 1-like	0	0.016129	0	0
A_14_P115847	1	chr1_q21.1	143921481	143921538	FMO5	flavin containing monooxygenase 5	0	0.016129	0	0
A_16_P00160936	1	chr1_q21.1	144322086	144322145	BCL9	B-cell CLL/lymphoma 9	0	0.00806452	0	0
A_14_P131065	1	chr1_q21.1	144367287	144367338	ACP6	acid phosphatase 6, lysophosphatidic	0	0.00806452	0	0
A_14_P200776	1	chr1_q21.1	144467604	144467663	GJA5	gap junction protein, alpha 5, 40kDa	0	0.016129	0	0
A_16_P15286625	1	chr1_q21.1	144603439	144603498	GJA8	gap junction protein, alpha 8, 50kDa	0	0.00806452	0	0
A_16_P35298661	1	chr1_q21.1	144636350	144636409	GPR89B	G protein-coupled receptor 89B	0	0.00806452	0	0
A_16_P15287128	1	chr1_q21.1	144874654	144874710	LOC284561	Hypothetical protein LOC284561	0	0.00806452	0	0
A_16_P15289248	1	chr1_q21.1	146012014	146012073	BC062745	CDNA FLJ30424 fis, clone BRACE2008881, weakly similar to ZINC FINGER PROTEIN 195	0	0.00806452	0	0.00806452
A_16_P15290229	1	chr1_q21.1	146534262	146534313	X14355	CDNA FLJ13580 fis, clone PLACE1008851	0	0.00806452	0	0
A_16_P00161710	1	chr1_q21.2	146549143	146549202	FCGR1A	Fc fragment of IgG, high affinity Ia, receptor (CD64)	0.0204082	0.00806452	0	0
A_16_P00161715	1	chr1_q21.2	146581869	146581928	HIST2H3D	Histone cluster 2, H3d	0.0204082	0.00806452	0	0
A_14_P100406	1	chr1_q21.2	146628218	146628264	BC068044		0.0204082	0	0	0
A_16_P00161734	1	chr1_q21.2	146634883	146634942	HIST2H2AA3	histone cluster 2, H2aa3	0.0204082	0.00806452	0	0
A_14_P112321	1	chr1_q21.2	146670238	146670297	HIST2H2BE	histone cluster 2, H2be	0.0204082	0.00806452	0	0
A_14_P101364	1	chr1_q21.2	146671976	146672032	HIST2H2AC		0.0204082	0.00806452	0	0
A_14_P130835	1	chr1_q21.2	146672118	146672170	HIST2H2AB		0.0204082	0.00806452	0	0
A_14_P129235	1	chr1_q21.2	146684362	146684408	BOLA1	bolA homolog 1 (E. coli)	0.0204082	0.00806452	0	0
A_16_P00161794	1	chr1_q21.2	146700170	146700227	SV2A	synaptic vesicle glycoprotein 2A	0.0204082	0.00806452	0	0
A_14_P108957	1	chr1_q21.2	146709632	146709691	SF3B4	splicing factor 3b, subunit 4, 49kDa	0.0204082	0.00806452	0	0
A_14_P133628	1	chr1_q21.2	146713854	146713913	MTMR11	myotubularin related protein 11	0.0204082	0.00806452	0	0
A_14_P130162	1	chr1_q21.2	146786984	146787043	OTUD7B	OTU domain containing 7B	0.0612245	0.00806452	0	0
A_16_P00162127	1	chr1_q21.2	146930257	146930316	VPS45	vacuolar protein sorting 45 homolog (S. cerevisiae)	0.0612245	0.00806452	0	0
A_14_P103528	1	chr1_q21.2	146938814	146938873	PLEKHO1	pleckstrin homology domain containing, family O member 1	0.0612245	0.00806452	0	0
A_16_P15291419	1	chr1_q21.2	147018750	147018809	ANP32E	acidic (leucine-rich) nuclear phosphoprotein 32 family, member E	0.0612245	0.00806452	0	0
A_14_P114014	1	chr1_q21.2	147047273	147047332	CA14	carbonic anhydrase XIV	0.0612245	0.00806452	0	0
A_14_P123368	1	chr1_q21.2	147051327	147051385	APH1A	anterior pharynx defective 1 homolog A (C. elegans)	0.0612245	0.00806452	0	0
A_16_P15291511	1	chr1_q21.2	147054959	147055018	BC068606		0.0612245	0.00806452	0	0
A_14_P120673	1	chr1_q21.2	147066339	147066398	C1orf54	chromosome 1 open reading frame 54	0.0612245	0.00806452	0	0
A_14_P120954	1	chr1_q21.2	147070449	147070503	C1orf51	chromosome 1 open reading frame 51	0.0612245	0.00806452	0	0
A_14_P114006	1	chr1_q21.2	147092292	147092348	MRPS21	mitochondrial ribosomal protein S21	0.0612245	0.00806452	0	0
A_14_P109827	1	chr1_q21.2	147137839	147137898	PRPF3	PRP3 pre-mRNA processing factor 3 homolog (S. cerevisiae)	0.0612245	0.00806452	0	0
A_16_P00162516	1	chr1_q21.2	147256955	147257014	KIAA0460		0.0612245	0.00806452	0	0
A_16_P35304281	1	chr1_q21.2	147288275	147288334	TARS2	threonyl-tRNA synthetase 2, mitochondrial (putative)	0.0612245	0.00806452	0	0
A_16_P00162587	1	chr1_q21.2	147299071	147299130	ECM1	extracellular matrix protein 1	0.0612245	0.00806452	0	0
A_16_P00162643	1	chr1_q21.2	147345996	147346053	ADAMTSL4	CDNA clone IMAGE:5223358	0.0612245	0.00806452	0	0
A_16_P00162675	1	chr1_q21.2	147363965	147364020	MCL1	myeloid cell leukemia sequence 1 (BCL2-related)	0.0612245	0.00806452	0	0
A_16_P00162704	1	chr1_q21.2	147402207	147402266	AK057901	CDNA FLJ25172 fis, clone CBR08787	0.0612245	0.00806452	0	0
A_16_P15292266	1	chr1_q21.2	147412654	147412713	ENSA	endosulfine alpha	0.0612245	0.00806452	0	0
A_16_P15292391	1	chr1_q21.2	147480230	147480289	GOLPH3L	golgi phosphoprotein 3-like	0.0612245	0.00806452	0	0
A_14_P119560	1	chr1_q21.2	147506206	147506265	HORMAD1	HORMA domain containing 1	0.0612245	0.00806452	0	0
A_14_P103986	1	chr1_q21.2	147551272	147551330	CTSS	cathepsin S	0.0612245	0.00806452	0	0
A_16_P00162917	1	chr1_q21.2	147591718	147591777	CTSK	cathepsin K	0.0612245	0.00806452	0	0
A_14_P134059	1	chr1_q21.2	147659658	147659717	ARNT	aryl hydrocarbon receptor nuclear translocator	0.0612245	0.00806452	0	0
A_16_P35305389	1	chr1_q21.2	147750204	147750263	SETDB1	SET domain, bifurcated 1	0.0612245	0.00806452	0	0
A_14_P112869	1	chr1_q21.2	147757238	147757297	LASS2	LAG1 homolog, ceramide synthase 2	0.0612245	0.00806452	0	0
A_14_P128620	1	chr1_q21.2	147779483	147779542	ANXA9	annexin A9	0.0612245	0.00806452	0	0
A_14_P130500	1	chr1_q21.2	147791827	147791886	FAM63A	family with sequence similarity 63, member A	0.0612245	0.00806452	0	0
A_16_P00163222	1	chr1_q21.2	147819305	147819364	PRUNE	prune homolog (Drosophila)	0.0612245	0.00806452	0	0
A_16_P00163240	1	chr1_q21.2	147831588	147831647	BNIPL	BCL2/adenovirus E1B 19kD interacting protein like	0.0612245	0.00806452	0	0
A_14_P200031	1	chr1_q21.2	147836751	147836810	C1orf56	chromosome 1 open reading frame 56	0.0612245	0.00806452	0	0
A_14_P136601	1	chr1_q21.2	147840673	147840718	CDC42SE1	CDC42 small effector 1	0.0612245	0.00806452	0	0
A_14_P108384	1	chr1_q21.2	147853680	147853739	MLLT11	myeloid/lymphoid or mixed-lineage leukemia (trithorax homolog, Drosophila); translocated to, 11	0.0612245	0.00806452	0	0
A_16_P15293333	1	chr1_q21.2	147903945	147904004	MGC29891		0.0612245	0.00806452	0	0
A_14_P106988	1	chr1_q21.2	147930006	147930065	SEMA6C	sema domain, transmembrane domain (TM), and cytoplasmic domain, (semaphorin) 6C	0.0612245	0.00806452	0	0
A_14_P110629	1	chr1_q21.2	147942498	147942555	TNFAIP8L2	tumor necrosis factor, alpha-induced protein 8-like 2	0.0612245	0.00806452	0	0
A_16_P35305969	1	chr1_q21.2	147946165	147946224	LYSMD1	LysM, putative peptidoglycan-binding, domain containing 1	0.0612245	0.00806452	0	0
A_14_P116662	1	chr1_q21.2	147953020	147953079	SCNM1	sodium channel modifier 1	0.0612245	0.00806452	0	0
A_14_P137815	1	chr1_q21.2	147958917	147958967	TMOD4	tropomodulin 4 (muscle)	0.0612245	0.00806452	0	0
A_16_P15293513	1	chr1_q21.2	147972464	147972523	VPS72	vacuolar protein sorting 72 homolog (S. cerevisiae)	0.0612245	0.00806452	0	0
A_16_P00163501	1	chr1_q21.2	148033355	148033414	PIP5K1A	phosphatidylinositol-4-phosphate 5-kinase, type I, alpha	0.0612245	0.00806452	0	0
A_14_P137809	1	chr1_q21.2	148052253	148052312	PSMD4	proteasome (prosome, macropain) 26S subunit, non-ATPase, 4	0.0612245	0.00806452	0	0
A_16_P00163531	1	chr1_q21.2	148066774	148066829	BC021024	Homo sapiens, clone IMAGE:3616855, mRNA	0.0612245	0.00806452	0	0
A_16_P35306308	1	chr1_q21.2	148076830	148076889	ZNF687	zinc finger protein 687	0.0612245	0.00806452	0	0
A_14_P113673	1	chr1_q21.2	148111268	148111327	PI4KB	phosphatidylinositol 4-kinase, catalytic, beta	0.0612245	0.00806452	0	0
A_14_P123584	1	chr1_q21.3	148130607	148130666	RFX5	regulatory factor X, 5 (influences HLA class II expression)	0.0612245	0.00806452	0	0
A_14_P108679	1	chr1_q21.3	148157189	148157248	SELENBP1	Selenium binding protein 1	0.0612245	0.00806452	0	0.016129
A_16_P35306583	1	chr1_q21.3	148181680	148181739	PSMB4	proteasome (prosome, macropain) subunit, beta type, 4	0.0612245	0.00806452	0	0.016129
A_16_P15294110	1	chr1_q21.3	148240982	148241041	POGZ	pogo transposable element with ZNF domain	0.0612245	0.016129	0	0
A_16_P00163900	1	chr1_q21.3	148324127	148324186	CGN	cingulin	0.0612245	0.016129	0	0
A_14_P117207	1	chr1_q21.3	148368050	148368109	TUFT1	tuftelin 1	0.0612245	0.016129	0	0
A_14_P124099	1	chr1_q21.3	148482652	148482711	SNX27	sorting nexin family member 27	0.0612245	0.016129	0	0
A_16_P00164125	1	chr1_q21.3	148497871	148497930	TNRC4	trinucleotide repeat containing 4	0.0612245	0.016129	0	0
A_16_P00164159	1	chr1_q21.3	148513095	148513154	FLJ36032	hypothetical protein FLJ36032	0.0612245	0.016129	0	0
A_14_P116957	1	chr1_q21.3	148545402	148545448	MRPL9	mitochondrial ribosomal protein L9	0.0612245	0.016129	0	0
A_14_P120948	1	chr1_q21.3	148556830	148556885	OAZ3	ornithine decarboxylase antizyme 3	0.0612245	0.016129	0	0
A_16_P00164232	1	chr1_q21.3	148574005	148574064	TDRKH	tudor and KH domain containing	0.0612245	0.016129	0	0
A_16_P00164241	1	chr1_q21.3	148577324	148577383	BC038201	Homo sapiens, Similar to hypothetical protein FLJ20378, clone IMAGE:4179392, mRNA	0.0612245	0.016129	0	0
A_16_P15294985	1	chr1_q21.3	148609931	148609980	RORC	RAR-related orphan receptor C	0.0612245	0.016129	0	0
A_14_P110983	1	chr1_q21.3	148634829	148634888	THEM5	thioesterase superfamily member 5	0.0612245	0.016129	0	0
A_16_P00164415	1	chr1_q21.3	148688559	148688615	THEM4	thioesterase superfamily member 4	0.0612245	0.016129	0	0
A_16_P35308098	1	chr1_q21.3	148776941	148777000	S100A10	S100 calcium binding protein A10	0.0612245	0.016129	0	0
A_16_P00164557	1	chr1_q21.3	148802951	148803005	AK125884		0.0612245	0.016129	0	0
A_14_P129524	1	chr1_q21.3	148820622	148820681	S100A11	S100 calcium binding protein A11	0.0612245	0.016129	0	0
A_16_P35308382	1	chr1_q21.3	148872969	148873028	TCHHL1		0.0612245	0.016129	0	0
A_14_P101186	1	chr1_q21.3	148900575	148900634	TCHH	trichohyalin	0.0612245	0.016129	0	0
A_16_P00164752	1	chr1_q21.3	148927292	148927351	RPTN	repetin	0.0612245	0.016129	0	0
A_16_P15295920	1	chr1_q21.3	148993070	148993129	CR933683		0.0612245	0.00806452	0	0
A_16_P15295958	1	chr1_q21.3	149006682	149006740	HRNR		0.0612245	0.00806452	0	0
A_16_P15296030	1	chr1_q21.3	149040203	149040260	BC014333	---	0.0612245	0.00806452	0	0
A_16_P00164904	1	chr1_q21.3	149093824	149093877	FLG		0.0408163	0.00806452	0	0
A_16_P15296135	1	chr1_q21.3	149124516	149124575	AK056431		0.0204082	0.00806452	0	0
A_16_P00164952	1	chr1_q21.3	149135090	149135149	FLG2	filaggrin family member 2	0.0204082	0.00806452	0	0
A_16_P15296229	1	chr1_q21.3	149150889	149150948	LOC339400	hypothetical protein LOC339400	0.0204082	0.00806452	0	0
A_14_P115963	1	chr1_q21.3	149197748	149197806	CRNN	cornulin	0.0204082	0.00806452	0	0
A_14_P137720	1	chr1_q21.3	149300646	149300705	CRCT1	cysteine-rich C-terminal 1	0.0204082	0.00806452	0	0
A_14_P138487	1	chr1_q21.3	149352010	149352067	LCE3E		0.0204082	0.00806452	0	0
A_14_P121322	1	chr1_q21.3	149365900	149365944	LCE3D	late cornified envelope 3D	0.0204082	0.00806452	0.0408163	0
A_16_P35309581	1	chr1_q21.3	149437459	149437518	C1orf46	chromosome 1 open reading frame 46	0.0204082	0.00806452	0	0
A_14_P200034	1	chr1_q21.3	149450117	149450161	LCE2D		0.0204082	0.00806452	0	0
A_14_P200035	1	chr1_q21.3	149461953	149462002	LCE2C		0.0204082	0.00806452	0	0
A_14_P133620	1	chr1_q21.3	149472740	149472793	LCE2B	late cornified envelope 2B	0.0204082	0.00806452	0	0
A_14_P200036	1	chr1_q21.3	149484785	149484829	LCE2A		0.0204082	0.00806452	0	0
A_16_P00165427	1	chr1_q21.3	149502562	149502618	C1orf68	chromosome 1 open reading frame 68	0.0204082	0.00806452	0	0
A_16_P00165508	1	chr1_q21.3	149545523	149545582	C1orf45		0.0204082	0.00806452	0	0
A_14_P200037	1	chr1_q21.3	149573806	149573854	LCE1E	late cornified envelope 1E	0.0204082	0.00806452	0	0
A_14_P134645	1	chr1_q21.3	149598429	149598476	LCE1B	late cornified envelope 1B	0.0408163	0.00806452	0	0
A_16_P00165690	1	chr1_q21.3	149670525	149670584	SMCP	sperm mitochondria-associated cysteine-rich protein	0.0408163	0.00806452	0	0
A_14_P120925	1	chr1_q21.3	149695407	149695454	IVL	involucrin	0.0408163	0.00806452	0	0
A_16_P15297558	1	chr1_q21.3	149730587	149730646	BC042056	Homo sapiens, clone IMAGE:5587935, mRNA	0.0408163	0.00806452	0	0
A_14_P122655	1	chr1_q21.3	149757296	149757355	SPRR4	small proline-rich protein 4	0.0408163	0.00806452	0	0
A_14_P124410	1	chr1_q21.3	149770646	149770705	SPRR1A	small proline-rich protein 1A	0.0408163	0.00806452	0	0
A_14_P116391	1	chr1_q21.3	149788459	149788518	SPRR3	small proline-rich protein 3	0.0408163	0.00806452	0	0
A_14_P120073	1	chr1_q21.3	149817483	149817537	SPRR1B	small proline-rich protein 1B (cornifin)	0.0408163	0.00806452	0	0
A_16_P15297784	1	chr1_q21.3	149827259	149827318	SPRR2D		0.0408163	0.00806452	0	0
A_14_P119955	1	chr1_q21.3	149841534	149841593	SPRR2B	small proline-rich protein 2B	0.0408163	0.00806452	0	0
A_16_P35310653	1	chr1_q21.3	149884863	149884922	BC058018		0.0408163	0.00806452	0	0
A_14_P106802	1	chr1_q21.3	149926487	149926546	SPRR2C	small proline-rich protein 2C	0.0408163	0.00806452	0	0
A_16_P35310720	1	chr1_q21.3	149935051	149935110	SPRR2G	small proline-rich protein 2G	0.0408163	0.00806452	0	0
A_16_P35310800	1	chr1_q21.3	149976168	149976227	BC038426	CDNA clone IMAGE:4824668	0.0408163	0.00806452	0	0
A_16_P00166054	1	chr1_q21.3	149990231	149990290	LELP1	late cornified envelope-like proline-rich 1	0.0408163	0.00806452	0	0
A_14_P110433	1	chr1_q21.3	150046473	150046521	LOR	loricrin	0.0408163	0.00806452	0	0
A_14_P125444	1	chr1_q21.3	150094542	150094601	PGLYRP3	peptidoglycan recognition protein 3	0.0408163	0.00806452	0	0
A_14_P103610	1	chr1_q21.3	150127788	150127847	PGLYRP4	peptidoglycan recognition protein 4	0.0408163	0.00806452	0	0
A_14_P100749	1	chr1_q21.3	150145628	150145687	S100A9	S100 calcium binding protein A9	0.0204082	0.00806452	0	0
A_14_P124338	1	chr1_q21.3	150159434	150159491	S100A12	S100 calcium binding protein A12	0.0204082	0.00806452	0	0
A_14_P105363	1	chr1_q21.3	150175715	150175768	S100A8	S100 calcium binding protein A8	0.0204082	0.00806452	0	0
A_14_P106240	1	chr1_q21.3	150203466	150203525	S100A7A	S100 calcium binding protein A7A	0.0204082	0.00806452	0	0
A_14_P125828	1	chr1_q21.3	150244667	150244726	S100A7	S100 calcium binding protein A7	0.0204082	0.00806452	0	0
A_16_P00166481	1	chr1_q21.3	150316093	150316152	S100A6	S100 calcium binding protein A6	0.0204082	0.00806452	0	0
A_16_P00166502	1	chr1_q21.3	150327194	150327253	S100A5	S100 calcium binding protein A5	0.0204082	0.00806452	0	0
A_16_P15298879	1	chr1_q21.3	150332314	150332366	S100A3	S100 calcium binding protein A3	0.0204082	0.00806452	0	0
A_16_P15298906	1	chr1_q21.3	150346701	150346760	S100A2	S100 calcium binding protein A2	0.0204082	0.00806452	0	0
A_16_P00166572	1	chr1_q21.3	150389160	150389208	S100A16	S100 calcium binding protein A16	0.0204082	0.00806452	0	0
A_14_P107098	1	chr1_q21.3	150400873	150400920	S100A14	S100 calcium binding protein A14	0.0204082	0.00806452	0	0
A_14_P138311	1	chr1_q21.3	150426666	150426725	S100A13	S100 calcium binding protein A13	0.0204082	0.016129	0	0
A_14_P134907	1	chr1_q21.3	150431078	150431129	C1orf77	chromosome 1 open reading frame 77	0.0204082	0.016129	0	0
A_14_P123709	1	chr1_q21.3	150447303	150447362	SNAPIN	SNAP-associated protein	0.0204082	0.016129	0	0
A_16_P15299141	1	chr1_q21.3	150454103	150454162	ILF2	interleukin enhancer binding factor 2, 45kDa	0.0204082	0.016129	0	0
A_16_P15299184	1	chr1_q21.3	150472058	150472115	NPR1	natriuretic peptide receptor A/guanylate cyclase A (atrionatriuretic peptide receptor A)	0.0204082	0.00806452	0	0
A_16_P00166809	1	chr1_q21.3	150559568	150559627	INTS3		0.0204082	0.00806452	0	0
A_14_P120830	1	chr1_q21.3	150564538	150564589	SLC27A3	solute carrier family 27 (fatty acid transporter), member 3	0.0204082	0.00806452	0	0
A_16_P00166902	1	chr1_q21.3	150610827	150610886	GATAD2B	GATA zinc finger domain containing 2B	0.0204082	0.00806452	0	0
A_16_P00166984	1	chr1_q21.3	150706383	150706442	AK094665		0.0204082	0.00806452	0	0
A_16_P00167007	1	chr1_q21.3	150720169	150720226	CR613795		0.0204082	0.00806452	0	0
A_14_P101801	1	chr1_q21.3	150724437	150724488	AB007945		0.0204082	0.00806452	0	0
A_14_P129483	1	chr1_q21.3	150738116	150738167	CRTC2	CREB regulated transcription coactivator 2	0.0204082	0.00806452	0	0
A_16_P00167061	1	chr1_q21.3	150747194	150747251	SLC39A1	solute carrier family 39 (zinc transporter), member 1	0.0204082	0.00806452	0	0
A_14_P116859	1	chr1_q21.3	150759837	150759896	CREB3L4	cAMP responsive element binding protein 3-like 4	0.0204082	0.00806452	0	0
A_14_P127661	1	chr1_q21.3	150762434	150762486	JTB	jumping translocation breakpoint	0.0204082	0.00806452	0	0
A_14_P134188	1	chr1_q21.3	150769927	150769986	RAB13	RAB13, member RAS oncogene family	0.0204082	0.00806452	0	0
A_14_P116884	1	chr1_q21.3	150776992	150777051	RPS27	ribosomal protein S27 (metallopanstimulin 1)	0.0204082	0.00806452	0	0
A_16_P00167211	1	chr1_q21.3	150921341	150921400	NUP210L	nucleoporin 210kDa-like	0.0204082	0.00806452	0	0
A_16_P35313145	1	chr1_q21.3	150927091	150927150	AK128000		0.0204082	0.00806452	0	0
A_14_P132594	1	chr1_q21.3	150976096	150976155	TPM3	tropomyosin 3	0.0204082	0.00806452	0	0
A_14_P118648	1	chr1_q21.3	151005293	151005352	C1orf43	chromosome 1 open reading frame 43	0.0204082	0.00806452	0	0
A_16_P15300447	1	chr1_q21.3	151050438	151050497	UBAP2L	ubiquitin associated protein 2-like	0.0204082	0.00806452	0	0
A_14_P109760	1	chr1_q21.3	151058042	151058094	BC005240		0.0204082	0.00806452	0	0
A_14_P110047	1	chr1_q21.3	151061118	151061177	HAX1	HCLS1 associated protein X-1	0.0204082	0.00806452	0	0
A_14_P118053	1	chr1_q21.3	151109453	151109502	AQP10	aquaporin 10	0.0204082	0.00806452	0	0
A_16_P00167515	1	chr1_q21.3	151135918	151135977	ATP8B2	ATPase, class I, type 8B, member 2	0.0204082	0.00806452	0	0
A_14_P131110	1	chr1_q21.3	151251940	151251999	IL6R	interleukin 6 receptor	0.0204082	0.00806452	0	0
A_16_P35314078	1	chr1_q21.3	151284627	151284686	SHE	Src homology 2 domain containing E	0.0204082	0.00806452	0	0
A_16_P15301019	1	chr1_q21.3	151333464	151333520	TDRD10		0.0204082	0.00806452	0	0
A_14_P111131	1	chr1_q21.3	151342676	151342735	UBE2Q1	ubiquitin-conjugating enzyme E2Q (putative) 1	0.0204082	0.00806452	0	0
A_16_P00167764	1	chr1_q21.3	151350712	151350770	X52229	Homo sapiens, clone IMAGE:3944699, mRNA	0.0204082	0.00806452	0	0
A_16_P15301112	1	chr1_q21.3	151363822	151363881	CHRNB2	cholinergic receptor, nicotinic, beta 2 (neuronal)	0.0204082	0.00806452	0	0
A_16_P15301250	1	chr1_q21.3	151412066	151412125	ADAR	adenosine deaminase, RNA-specific	0.0204082	0.00806452	0	0
A_14_P127061	1	chr1_q22	151654608	151654664	KCNN3	potassium intermediate/small conductance calcium-activated channel, subfamily N, member 3	0.0408163	0.00806452	0	0
A_16_P35315754	1	chr1_q22	151878132	151878191	MUC1	mucin 1, cell surface associated	0.0408163	0.016129	0	0.00806452
A_16_P35316054	1	chr1_q22	151987501	151987560	THBS3	thrombospondin 3	0.0408163	0.016129	0	0
A_14_P121890	1	chr1_q22	151992836	151992895	MTX1	metaxin 1	0.0408163	0.016129	0	0
A_16_P35316109	1	chr1_q22	151998685	151998734	GBA	glucosidase, beta; acid (includes glucosylceramidase)	0.0408163	0.016129	0	0
A_16_P15302786	1	chr1_q22	152010139	152010198	BC000349		0.0408163	0.016129	0	0
A_16_P00168730	1	chr1_q22	152014680	152014736	AK056250	CDNA FLJ31688 fis, clone NT2RI2005520	0.0408163	0.016129	0	0
A_14_P115285	1	chr1_q22	152036987	152037031	C1orf2	chromosome 1 open reading frame 2	0.0408163	0.016129	0	0
A_14_P133588	1	chr1_q22	152040188	152040246	SCAMP3	secretory carrier membrane protein 3	0.0408163	0.016129	0	0
A_16_P35316316	1	chr1_q22	152055627	152055686	CLK2	CDC-like kinase 2	0.0408163	0.016129	0	0
A_16_P15302941	1	chr1_q22	152069377	152069427	HCN3	hyperpolarization activated cyclic nucleotide-gated potassium channel 3	0.0408163	0.016129	0	0
A_14_P114022	1	chr1_q22	152077981	152078026	PKLR	pyruvate kinase, liver and RBC	0.0408163	0.016129	0	0
A_14_P118865	1	chr1_q22	152102091	152102146	FDPS	farnesyl diphosphate synthase (farnesyl pyrophosphate synthetase, dimethylallyltranstransferase, geranyltranstransferase)	0.0408163	0.016129	0	0
A_14_P110134	1	chr1_q22	152110037	152110088	RUSC1	RUN and SH3 domain containing 1	0.0408163	0.016129	0	0
A_14_P110595	1	chr1_q22	152114155	152114214	ASH1L	ash1 (absent, small, or homeotic)-like (Drosophila)	0.0408163	0.016129	0	0
A_14_P104104	1	chr1_q22	152346796	152346855	LOC645676	hypothetical LOC645676	0.0408163	0.00806452	0	0
A_16_P15303503	1	chr1_q22	152354514	152354573	AY339211		0.0408163	0.00806452	0	0
A_14_P112204	1	chr1_q22	152396245	152396301	MSTO1	misato homolog 1 (Drosophila)	0.0408163	0.00806452	0	0
A_16_P15303591	1	chr1_q22	152429240	152429299	BC092439		0.0408163	0.00806452	0	0
A_14_P131921	1	chr1_q22	152472370	152472429	YY1AP1	YY1 associated protein 1	0.0408163	0.00806452	0	0
A_14_P118949	1	chr1_q22	152521242	152521297	DAP3	death associated protein 3	0.0408163	0.00806452	0	0
A_14_P104089	1	chr1_q22	152636626	152636685	GON4L	gon-4-like (C. elegans)	0.0408163	0.00806452	0	0
A_14_P100980	1	chr1_q22	152667934	152667993	SYT11	synaptotagmin XI	0.0408163	0.00806452	0	0
A_14_P200041	1	chr1_q22	152691897	152691956	RIT1	Ras-like without CAAX 1	0.0408163	0.00806452	0	0
A_16_P15304183	1	chr1_q22	152714659	152714718	KIAA0907	KIAA0907	0.0408163	0.00806452	0	0
A_14_P105474	1	chr1_q22	152762755	152762814	ARHGEF2	rho/rac guanine nucleotide exchange factor (GEF) 2	0.0408163	0.00806452	0	0
A_16_P00169508	1	chr1_q22	152770201	152770260	AB014551		0.0408163	0.00806452	0	0
A_16_P00169541	1	chr1_q22	152796807	152796866	SSR2	signal sequence receptor, beta (translocon-associated protein beta)	0.0408163	0.00806452	0	0
A_16_P00169585	1	chr1_q22	152835073	152835132	UBQLN4	ubiquilin 4	0.0408163	0.00806452	0	0
A_14_P127074	1	chr1_q22	152840490	152840549	MAPBPIP	mitogen-activated protein-binding protein-interacting protein	0.0408163	0.00806452	0	0
A_14_P127546	1	chr1_q22	152848350	152848409	RAB25	RAB25, member RAS oncogene family	0.0408163	0.00806452	0	0
A_16_P15304555	1	chr1_q22	152859169	152859228	MEX3A	mex-3 homolog A (C. elegans)	0.0408163	0.00806452	0	0
A_14_P136879	1	chr1_q22	152878225	152878284	AK056143		0.0408163	0.00806452	0	0
A_16_P00169727	1	chr1_q22	152920942	152920999	LMNA	lamin A/C	0.0408163	0.00806452	0	0
A_16_P15304805	1	chr1_q22	152950566	152950617	SEMA4A	sema domain, immunoglobulin domain (Ig), transmembrane domain (TM) and short cytoplasmic domain, (semaphorin) 4A	0.0408163	0.00806452	0	0
A_16_P00169811	1	chr1_q22	152995543	152995602	SLC25A44	solute carrier family 25, member 44	0.0408163	0.00806452	0	0
A_14_P100083	1	chr1_q22	153019706	153019765	PMF1	polyamine-modulated factor 1	0.0408163	0.00806452	0	0
A_14_P131501	1	chr1_q22	153026574	153026623	PAQR6	progestin and adipoQ receptor family member VI	0.0408163	0.00806452	0	0
A_16_P00169909	1	chr1_q22	153061801	153061860	SMG5	Smg-5 homolog, nonsense mediated mRNA decay factor (C. elegans)	0.0408163	0.00806452	0	0
A_16_P00169926	1	chr1_q22	153071659	153071718	TMEM79	transmembrane protein 79	0.0408163	0.00806452	0	0
A_14_P113243	1	chr1_q22	153077328	153077376	C1orf85	chromosome 1 open reading frame 85	0.0408163	0.00806452	0	0
A_14_P200042	1	chr1_q22	153120420	153120478	CCT3	chaperonin containing TCP1, subunit 3 (gamma)	0.0408163	0.00806452	0	0
A_14_P113791	1	chr1_q22	153129794	153129852	C1orf182	chromosome 1 open reading frame 182	0.0408163	0.00806452	0	0
A_16_P00170041	1	chr1_q22	153166163	153166219	RHBG	Rh family, B glycoprotein	0.0408163	0.00806452	0	0
A_16_P35319056	1	chr1_q22	153175336	153175390	AB007971		0.0408163	0.00806452	0	0
A_14_P119703	1	chr1_q22	153212346	153212398	C1orf61	chromosome 1 open reading frame 61	0.0408163	0.00806452	0	0
A_16_P00170263	1	chr1_q22	153280994	153281052	MEF2D	myocyte enhancer factor 2D	0.0408163	0.00806452	0	0
A_14_P104634	1	chr1_q22	153354414	153354473	IQGAP3	IQ motif containing GTPase activating protein 3	0.0408163	0.00806452	0	0
A_14_P124908	1	chr1_q22	153376126	153376171	APOA1BP	apolipoprotein A-I binding protein	0.0408163	0.00806452	0	0
A_14_P113561	1	chr1_q22	153381918	153381977	GPATCH4	G patch domain containing 4	0.0408163	0.00806452	0	0
A_14_P100389	1	chr1_q22	153403383	153403442	HAPLN2	hyaluronan and proteoglycan link protein 2	0.0408163	0.00806452	0	0
A_16_P00170496	1	chr1_q23.1	153440271	153440329	BCAN	brevican	0.0408163	0.00806452	0	0
A_14_P133525	1	chr1_q23.1	153456508	153456556	NES	nestin	0.0408163	0.00806452	0	0
A_16_P15306172	1	chr1_q23.1	153487031	153487090	CRABP2	cellular retinoic acid binding protein 2	0.0408163	0.00806452	0	0
A_14_P120697	1	chr1_q23.1	153508659	153508714	ISG20L2	interferon stimulated exonuclease gene 20kDa-like 2	0.0408163	0.00806452	0	0
A_14_P135490	1	chr1_q23.1	153518461	153518520	C1orf66	chromosome 1 open reading frame 66	0.0408163	0.00806452	0	0
A_14_P105949	1	chr1_q23.1	153522163	153522222	MRPL24	mitochondrial ribosomal protein L24	0.0408163	0.00806452	0	0
A_14_P111109	1	chr1_q23.1	153531129	153531187	HDGF	hepatoma-derived growth factor (high-mobility group protein 1-like)	0.0408163	0.00806452	0	0
A_16_P00170678	1	chr1_q23.1	153542865	153542924	AL833592		0.0408163	0.00806452	0	0
A_16_P00170729	1	chr1_q23.1	153583631	153583690	PRCC	papillary renal cell carcinoma (translocation-associated)	0.0408163	0.00806452	0	0
A_14_P200043	1	chr1_q23.1	153599612	153599658	SH2D2A	SH2 domain protein 2A	0.0408163	0.00806452	0	0
A_16_P15306474	1	chr1_q23.1	153609809	153609868	NTRK1		0.0408163	0.00806452	0	0
A_16_P15306540	1	chr1_q23.1	153629940	153629997	INSRR	insulin receptor-related receptor	0.0408163	0.00806452	0	0
A_16_P00170936	1	chr1_q23.1	153698993	153699052	PEAR1	platelet endothelial aggregation receptor 1	0.0408163	0.00806452	0	0
A_16_P15306803	1	chr1_q23.1	153715927	153715986	C1orf92		0.0408163	0.00806452	0	0
A_14_P122851	1	chr1_q23.1	153827498	153827557	ARHGEF11	Rho guanine nucleotide exchange factor (GEF) 11	0.0408163	0.00806452	0	0
A_16_P15307232	1	chr1_q23.1	153880438	153880482	FLJ16478		0.0408163	0.00806452	0	0
A_14_P110400	1	chr1_q23.1	153919453	153919512	ETV3	ets variant gene 3	0.0408163	0.00806452	0	0
A_14_P120324	1	chr1_q23.1	154335245	154335299	FCRL5	Fc receptor-like 5	0.0816327	0.00806452	0	0
A_14_P117753	1	chr1_q23.1	154376768	154376827	FCRL4	Fc receptor-like 4	0.0612245	0.00806452	0	0
A_14_P118917	1	chr1_q23.1	154478128	154478187	FCRL3	Fc receptor-like 3	0.0612245	0.00806452	0	0
A_16_P35322681	1	chr1_q23.1	154553348	154553407	FCRL2	Fc receptor-like 2	0.0612245	0.00806452	0	0
A_16_P15308723	1	chr1_q23.1	154593941	154594000	FCRL1	Fc receptor-like 1	0.0612245	0.00806452	0	0
A_16_P35322852	1	chr1_q23.1	154624361	154624420	CD5L	CD5 molecule-like	0.0612245	0.00806452	0	0
A_14_P108814	1	chr1_q23.1	154699522	154699581	hCG_1994895	hCG1994895	0.0612245	0.00806452	0	0
A_16_P00172203	1	chr1_q23.1	154727610	154727669	AK057438		0.0612245	0.00806452	0	0
A_16_P00172377	1	chr1_q23.1	154831698	154831757	KIRREL		0.0612245	0.00806452	0	0
A_16_P15309507	1	chr1_q23.1	154913961	154914020	hCG_1654703	hCG1654703	0.0408163	0.00806452	0	0
A_14_P103137	1	chr1_q23.1	154966651	154966710	CD1D	CD1d molecule	0.0408163	0.00806452	0	0
A_16_P15309664	1	chr1_q23.1	154982890	154982946	AK097921		0.0408163	0.00806452	0	0
A_16_P15309681	1	chr1_q23.1	155027576	155027635	CR603267		0.0408163	0.00806452	0	0
A_14_P127974	1	chr1_q23.1	155037466	155037525	CD1A	CD1a molecule	0.0408163	0.00806452	0	0
A_14_P103654	1	chr1_q23.1	155073202	155073253	CD1C	CD1c molecule	0.0408163	0.00806452	0	0
A_14_P137670	1	chr1_q23.1	155113723	155113780	CD1B	CD1b molecule	0.0408163	0.00806452	0	0
A_14_P201239	1	chr1_q23.1	155139562	155139620	CD1E	CD1e molecule	0.0408163	0.00806452	0	0
A_16_P00172730	1	chr1_q23.1	155145482	155145541	AK128347		0.0408163	0.00806452	0	0
A_16_P35324269	1	chr1_q23.1	155271904	155271963	AK057554	CDNA FLJ32992 fis, clone THYMU1000098	0.0408163	0.00806452	0	0
A_16_P00172955	1	chr1_q23.1	155330914	155330973	OR6Y1		0.0408163	0.00806452	0	0
A_14_P133002	1	chr1_q23.1	155466261	155466319	SPTA1	spectrin, alpha, erythrocytic 1 (elliptocytosis 2)	0.0612245	0.00806452	0	0
A_16_P00173300	1	chr1_q23.1	155537856	155537915	OR6K6		0.0612245	0.00806452	0	0
A_16_P00173337	1	chr1_q23.1	155559839	155559898	OR6N2		0.0612245	0.00806452	0	0
A_16_P35325204	1	chr1_q23.1	155630512	155630571	MNDA	myeloid cell nuclear differentiation antigen	0.0612245	0.00806452	0	0
A_16_P35325442	1	chr1_q23.1	155759582	155759641	PYHIN1	pyrin and HIN domain family, member 1	0.0612245	0.00806452	0	0
A_14_P137822	1	chr1_q23.1	155782978	155783028	AK094968		0.0612245	0.00806452	0	0
A_14_P133897	1	chr1_q23.1	155835853	155835912	IFI16	interferon, gamma-inducible protein 16	0.0612245	0.00806452	0	0
A_16_P00173706	1	chr1_q23.1	155856129	155856188	AIM2	absent in melanoma 2	0.0612245	0.00806452	0	0
A_14_P132596	1	chr1_q23.2	155988363	155988417	DARC	Duffy blood group, chemokine receptor	0.0612245	0.00806452	0	0
A_16_P15312027	1	chr1_q23.2	156089087	156089146	FCER1A		0.0612245	0.00806452	0	0
A_16_P15312227	1	chr1_q23.2	156218970	156219029	BC038194	Homo sapiens, clone IMAGE:3917623, mRNA	0.0612245	0.00806452	0	0
A_14_P130266	1	chr1_q23.2	156223043	156223094	OR10J1	Homo sapiens, clone IMAGE:3917623, mRNA	0.0612245	0.00806452	0	0
A_16_P15312419	1	chr1_q23.2	156334478	156334537	LOC646430	similar to serum amyloid P component precursor	0.0612245	0.00806452	0	0
A_14_P200044	1	chr1_q23.2	156371167	156371226	APCS	amyloid P component, serum	0.0612245	0.00806452	0	0
A_14_P134745	1	chr1_q23.2	156497370	156497422	CRP	C-reactive protein, pentraxin-related	0.0612245	0.00806452	0	0
A_14_P120630	1	chr1_q23.2	156565153	156565202	DUSP23	dual specificity phosphatase 23	0.0612245	0.00806452	0	0
A_16_P15312979	1	chr1_q23.2	156583660	156583719	AK131201		0.0612245	0.00806452	0	0
A_16_P35327278	1	chr1_q23.2	156597191	156597250	FCRL6		0.0612245	0.00806452	0	0
A_16_P00174673	1	chr1_q23.2	156620085	156620144	SLAMF8	SLAM family member 8	0.0612245	0.00806452	0	0
A_16_P35327400	1	chr1_q23.2	156636183	156636242	C1orf204	chromosome 1 open reading frame 204	0.0612245	0.00806452	0	0
A_16_P00174707	1	chr1_q23.2	156641347	156641406	LOC391123		0.0612245	0.00806452	0	0
A_16_P15313275	1	chr1_q23.2	156680502	156680561	CCDC19	coiled-coil domain containing 19	0.0612245	0.00806452	0	0
A_16_P00174803	1	chr1_q23.2	156691735	156691794	CR604695	HSPC081	0.0612245	0.00806452	0	0
A_14_P137054	1	chr1_q23.2	156706427	156706472	TAGLN2	transgelin 2	0.0612245	0.00806452	0	0
A_16_P15313409	1	chr1_q23.2	156727647	156727705	IGSF9	immunoglobulin superfamily, member 9	0.0612245	0.00806452	0	0
A_14_P116050	1	chr1_q23.2	156737077	156737124	SLAMF9	SLAM family member 9	0.0612245	0.00806452	0	0
A_16_P00174908	1	chr1_q23.2	156747801	156747860	AF088076	Full length insert cDNA clone ZE01A04	0.0612245	0.00806452	0	0
A_14_P119545	1	chr1_q23.2	156812968	156813027	PIGM	phosphatidylinositol glycan anchor biosynthesis, class M	0.0612245	0.00806452	0	0
A_16_P00175082	1	chr1_q23.2	156850306	156850365	KCNJ10	potassium inwardly-rectifying channel, subfamily J, member 10	0.0612245	0.00806452	0	0
A_16_P15313814	1	chr1_q23.2	156868465	156868516	KCNJ9	potassium inwardly-rectifying channel, subfamily J, member 9	0.0612245	0.00806452	0	0
A_14_P137800	1	chr1_q23.2	156874678	156874724	IGSF8	immunoglobulin superfamily, member 8	0.0612245	0.00806452	0	0
A_14_P117927	1	chr1_q23.2	156921294	156921353	ATP1A2	ATPase, Na+/K+ transporting, alpha 2 (+) polypeptide	0.0612245	0.00806452	0	0
A_16_P00175290	1	chr1_q23.2	156969618	156969677	ATP1A4	ATPase, Na+/K+ transporting, alpha 4 polypeptide	0.0612245	0.00806452	0	0
A_16_P00175318	1	chr1_q23.2	156984468	156984527	CASQ1	calsequestrin 1 (fast-twitch, skeletal muscle)	0.0612245	0.00806452	0	0
A_14_P136774	1	chr1_q23.2	156990900	156990959	PEA15	phosphoprotein enriched in astrocytes 15	0.0612245	0.00806452	0	0
A_14_P106757	1	chr1_q23.2	157044186	157044245	WDR42A	WD repeat domain 42A	0.0612245	0.00806452	0	0
A_16_P00175462	1	chr1_q23.2	157067614	157067673	PEX19	peroxisomal biogenesis factor 19	0.0612245	0.00806452	0	0
A_16_P35328957	1	chr1_q23.2	157122958	157123017	COPA	coatomer protein complex, subunit alpha	0.0612245	0.00806452	0	0
A_16_P15314573	1	chr1_q23.2	157137306	157137365	NCSTN	nicastrin	0.0612245	0.00806452	0	0
A_14_P123209	1	chr1_q23.2	157153399	157153443	NHLH1	nescient helix loop helix 1	0.0816327	0.00806452	0	0
A_16_P35329224	1	chr1_q23.2	157210261	157210320	VANGL2		0.0816327	0.00806452	0	0
A_14_P138911	1	chr1_q23.2	157300891	157300950	SLAMF6	SLAM family member 6	0.0816327	0.00806452	0	0
A_14_P138687	1	chr1_q23.3	157361836	157361895	CD84	CD84 molecule	0.0816327	0.00806452	0	0
A_14_P137324	1	chr1_q23.3	157429972	157430027	SLAMF1	signaling lymphocytic activation molecule family member 1	0.0816327	0.00806452	0	0
A_14_P130805	1	chr1_q23.3	157489641	157489700	CD48	CD48 molecule	0.0816327	0.016129	0	0
A_16_P15315391	1	chr1_q23.3	157536330	157536389	SLAMF7	SLAM family member 7	0.0816327	0.016129	0	0
A_16_P15315425	1	chr1_q23.3	157557058	157557117	AK097200		0.0816327	0.016129	0	0
A_14_P101269	1	chr1_q23.3	157610623	157610682	LY9	lymphocyte antigen 9	0.0816327	0.016129	0	0
A_14_P137877	1	chr1_q23.3	157639041	157639100	CD244	CD244 molecule, natural killer cell receptor 2B4	0.0816327	0.016129	0	0
A_16_P35330185	1	chr1_q23.3	157666359	157666418	ITLN1	intelectin 1 (galactofuranose binding)	0.0612245	0.016129	0	0
A_16_P35330249	1	chr1_q23.3	157725041	157725100	AK123144		0.0612245	0.016129	0	0
A_14_P138580	1	chr1_q23.3	157730768	157730821	ITLN2		0.0612245	0.016129	0	0
A_16_P15315897	1	chr1_q23.3	157819203	157819262	F11R	F11 receptor	0.0612245	0.016129	0	0
A_14_P110659	1	chr1_q23.3	157827760	157827813	USF1	upstream transcription factor 1	0.0612245	0.016129	0	0
A_16_P15315977	1	chr1_q23.3	157850625	157850684	ARHGAP30		0.0612245	0.016129	0	0
A_16_P15316040	1	chr1_q23.3	157871153	157871212	PVRL4	poliovirus receptor-related 4	0.0612245	0.016129	0	0
A_14_P127353	1	chr1_q23.3	157882386	157882435	KLHDC9	kelch domain containing 9	0.0612245	0.016129	0	0
A_16_P15316115	1	chr1_q23.3	157897752	157897811	PFDN2	prefoldin subunit 2	0.0612245	0.016129	0	0
A_16_P15316125	1	chr1_q23.3	157901934	157901992	DEDD	death effector domain containing	0.0612245	0.016129	0	0
A_14_P114523	1	chr1_q23.3	157936701	157936760	UFC1	ubiquitin-fold modifier conjugating enzyme 1	0.0612245	0.00806452	0	0
A_14_P118597	1	chr1_q23.3	157946403	157946453	USP21	ubiquitin specific peptidase 21	0.0612245	0.00806452	0	0
A_14_P121393	1	chr1_q23.3	157953690	157953747	PPOX	protoporphyrinogen oxidase	0.0612245	0.00806452	0	0
A_16_P15316289	1	chr1_q23.3	157959208	157959267	B4GALT3	UDP-Gal:betaGlcNAc beta 1,4- galactosyltransferase, polypeptide 3	0.0612245	0.00806452	0	0
A_14_P122881	1	chr1_q23.3	157981603	157981649	ADAMTS4		0.0612245	0.00806452	0	0
A_14_P118933	1	chr1_q23.3	157992317	157992370	NDUFS2	NADH dehydrogenase (ubiquinone) Fe-S protein 2, 49kDa (NADH-coenzyme Q reductase)	0.0612245	0.00806452	0	0
A_16_P00176637	1	chr1_q23.3	158001533	158001592	FCER1G	Fc fragment of IgE, high affinity I, receptor for; gamma polypeptide	0.0612245	0.00806452	0	0
A_14_P103272	1	chr1_q23.3	158005361	158005417	APOA2	apolipoprotein A-II	0.0612245	0.00806452	0	0
A_14_P200045	1	chr1_q23.3	158012873	158012928	TOMM40L	translocase of outer mitochondrial membrane 40 homolog (yeast)-like	0.0612245	0.00806452	0	0
A_16_P15316458	1	chr1_q23.3	158017303	158017362	NR1I3	nuclear receptor subfamily 1, group I, member 3	0.0612245	0.00806452	0	0
A_16_P15316466	1	chr1_q23.3	158024044	158024102	BX537951		0.0612245	0.00806452	0	0
A_16_P15316485	1	chr1_q23.3	158032840	158032899	AK127099		0.0612245	0.00806452	0	0
A_16_P00176704	1	chr1_q23.3	158051249	158051308	BC028905		0.0612245	0.00806452	0	0
A_14_P124808	1	chr1_q23.3	158066898	158066957	PCP4L1	Purkinje cell protein 4 like 1	0.0612245	0.00806452	0	0
A_14_P134814	1	chr1_q23.3	158088248	158088293	MPZ	myelin protein zero (Charcot-Marie-Tooth neuropathy 1B)	0.0612245	0.00806452	0	0.016129
A_14_P121105	1	chr1_q23.3	158144970	158145029	SDHC	succinate dehydrogenase complex, subunit C, integral membrane protein, 15kDa	0.0612245	0.016129	0	0.016129
A_16_P35331419	1	chr1_q23.3	158150653	158150712	C1orf192	CDNA FLJ13332 fis, clone OVARC1001813	0.0612245	0.016129	0	0.016129
A_14_P123651	1	chr1_q23.3	158296770	158296814	FCGR2A	Fc fragment of IgG, low affinity IIa, receptor (CD32)	0.0612245	0.016129	0	0
A_14_P107820	1	chr1_q23.3	158309145	158309195	HSPA6	heat shock 70kDa protein 6 (HSP70B')	0.0612245	0.016129	0	0
A_16_P00176967	1	chr1_q23.3	158325153	158325212	FCGR3B	Fc fragment of IgG, low affinity IIIb, receptor (CD16b)	0.0612245	0.016129	0	0
A_14_P122986	1	chr1_q23.3	158332696	158332749	FCGR3A		0.0612245	0.016129	0	0
A_14_P109934	1	chr1_q23.3	158372551	158372610	FCGR2B	Fc fragment of IgG, low affinity IIb, receptor (CD32)	0.0816327	0.0241935	0	0
A_14_P127243	1	chr1_q23.3	158408551	158408609	FCRLM1		0.0816327	0.016129	0	0
A_16_P15317606	1	chr1_q23.3	158536985	158537044	FCRLA	Fc receptor-like A	0.0816327	0.0241935	0	0
A_14_P127720	1	chr1_q23.3	159069522	159069576	NOS1AP	nitric oxide synthase 1 (neuronal) adaptor protein	0.0816327	0.00806452	0	0
A_14_P138496	1	chr1_q23.3	159077369	159077428	C1orf111	chromosome 1 open reading frame 111	0.0816327	0.00806452	0	0
A_16_P15319155	1	chr1_q23.3	159083076	159083135	FLJ13137	hypothetical gene supported by AK125122	0.0816327	0.00806452	0	0
A_14_P137647	1	chr1_q23.3	159110162	159110221	SH2D1B	SH2 domain containing 1B	0.0816327	0.00806452	0	0
A_14_P109472	1	chr1_q23.3	159224611	159224670	UHMK1	U2AF homology motif (UHM) kinase 1	0.0816327	0.00806452	0	0
A_16_P15319422	1	chr1_q23.3	159229544	159229603	AL137257	Homo sapiens, Similar to likely ortholog of yeast ARV1, clone IMAGE:3460560, mRNA	0.0816327	0.00806452	0	0
A_16_P15319588	1	chr1_q23.3	159289757	159289816	UAP1	UDP-N-acteylglucosamine pyrophosphorylase 1	0.0816327	0.00806452	0	0
A_16_P15320118	1	chr1_q23.3	159485725	159485784	DDR2	discoidin domain receptor family, member 2	0.0816327	0.00806452	0	0
A_16_P00178776	1	chr1_q23.3	159498830	159498889	HSD17B7	hydroxysteroid (17-beta) dehydrogenase 7	0.0816327	0.00806452	0	0
A_16_P35335166	1	chr1_q23.3	159569825	159569884	C1orf110	chromosome 1 open reading frame 110	0.0816327	0.00806452	0	0
A_16_P15320836	1	chr1_q23.3	159777875	159777934	RGS4	regulator of G-protein signaling 4	0.0816327	0.016129	0	0
A_16_P35335977	1	chr1_q23.3	159904175	159904234	RGS5	regulator of G-protein signaling 5	0.0816327	0.016129	0	0
A_14_P106162	1	chr1_q23.3	160056784	160056843	NUF2	NUF2, NDC80 kinetochore complex component, homolog (S. cerevisiae)	0.0816327	0.016129	0	0
A_14_P119839	1	chr1_q23.3	161547713	161547771	PBX1	pre-B-cell leukemia homeobox 1	0.0816327	0.00806452	0	0
A_14_P123583	1	chr1_q23.3	162051217	162051276	LMX1A	LIM homeobox transcription factor 1, alpha	0.0816327	0.00806452	0	0
A_16_P00182599	1	chr1_q23.3	162145753	162145812	RXRG	retinoid X receptor, gamma	0.0816327	0.00806452	0	0
A_16_P15326921	1	chr1_q23.3	162279423	162279482	LOC400794	hypothetical gene supported by BC030596	0.0816327	0.00806452	0	0
A_14_P122838	1	chr1_q24.1	162355211	162355270	MGST3	microsomal glutathione S-transferase 3	0.0816327	0.00806452	0	0
A_14_P115810	1	chr1_q24.1	162396192	162396251	ALDH9A1	aldehyde dehydrogenase 9 family, member A1	0.0816327	0.00806452	0	0
A_16_P15327349	1	chr1_q24.1	162459706	162459765	TMCO1	transmembrane and coiled-coil domains 1	0.0816327	0.00806452	0	0
A_16_P15327440	1	chr1_q24.1	162515983	162516042	AK093302		0.0816327	0.00806452	0	0
A_16_P15327673	1	chr1_q24.1	162604037	162604095	UCK2	uridine-cytidine kinase 2	0.0816327	0.00806452	0	0
A_16_P00183277	1	chr1_q24.1	162610595	162610654	BX640859	CDNA FLJ31233 fis, clone KIDNE2004579	0.0816327	0.00806452	0	0
A_16_P15328009	1	chr1_q24.1	162752984	162753043	AK055795		0.0816327	0.00806452	0	0
A_16_P00183659	1	chr1_q24.1	162865519	162865578	FAM78B	family with sequence similarity 78, member B	0.0816327	0.00806452	0	0
A_14_P114497	1	chr1_q24.1	163322798	163322856	FMO9P	flavin containing monooxygenase 9 pseudogene	0.0612245	0.00806452	0	0
A_16_P00184304	1	chr1_q24.1	163492243	163492302	LOC646693	similar to Calponin-2 (Calponin H2, smooth muscle) (Neutral calponin)	0.0612245	0.00806452	0	0
A_16_P15329576	1	chr1_q24.1	163549777	163549836	POGK	---	0.0612245	0.00806452	0	0
A_14_P114293	1	chr1_q24.1	163555737	163555796	AB040946	---	0.0612245	0.00806452	0	0
A_16_P00184428	1	chr1_q24.1	163576490	163576549	TADA1L	transcriptional adaptor 1 (HFI1 homolog, yeast)-like	0.0612245	0.00806452	0	0
A_16_P35344640	1	chr1_q24.1	163589271	163589330	AY726559		0.0612245	0.00806452	0	0
A_16_P00184600	1	chr1_q24.1	163673756	163673813	C1orf32		0.0612245	0.00806452	0	0
A_14_P121669	1	chr1_q24.1	163722788	163722847	MAEL	maelstrom homolog (Drosophila)	0.0612245	0.00806452	0	0
A_14_P201952	1	chr1_q24.1	163790648	163790707	GPA33	Transcribed locus	0.0612245	0.00806452	0	0
A_16_P00184807	1	chr1_q24.1	163819843	163819902	DUSP27	dual specificity phosphatase 27 (putative)	0.0612245	0.00806452	0	0
A_14_P101718	1	chr1_q24.2	164116897	164116956	POU2F1	POU class 2 homeobox 1	0.0612245	0.00806452	0	0
A_16_P15331048	1	chr1_q24.2	164123299	164123358	BC037864	---	0.0612245	0.00806452	0	0
A_16_P00185444	1	chr1_q24.2	164216118	164216177	CD247	CD247 molecule	0.0612245	0.00806452	0	0
A_16_P00185505	1	chr1_q24.2	164253171	164253230	CREG1	cellular repressor of E1A-stimulated genes 1	0.0612245	0.00806452	0	0
A_14_P107584	1	chr1_q24.2	164406139	164406198	RCSD1	RCSD domain containing 1	0.0612245	0.00806452	0	0
A_14_P100965	1	chr1_q24.2	164490984	164491043	MPZL1	myelin protein zero-like 1	0.0612245	0.00806452	0	0
A_16_P00186025	1	chr1_q24.2	164611447	164611506	SAC	testicular soluble adenylyl cyclase	0.0612245	0.00806452	0	0
A_14_P100123	1	chr1_q24.2	164632887	164632946	BRP44	brain protein 44	0.0612245	0.00806452	0	0
A_16_P00186236	1	chr1_q24.2	164767299	164767358	IQWD1	IQ motif and WD repeats 1	0.0612245	0.00806452	0	0
A_16_P00186340	1	chr1_q24.2	164834786	164834844	GPR161	G protein-coupled receptor 161	0.0612245	0.00806452	0	0
A_14_P130224	1	chr1_q24.2	164902883	164902942	TIPRL	TIP41, TOR signaling pathway regulator-like (S. cerevisiae)	0.0612245	0.00806452	0	0
A_16_P15333037	1	chr1_q24.2	164937438	164937497	SFT2D2	SFT2 domain containing 2	0.0612245	0.00806452	0	0
A_14_P123765	1	chr1_q24.2	164972509	164972568	AK091404	Transcribed locus	0.0612245	0.00806452	0	0
A_16_P15333184	1	chr1_q24.2	165009575	165009634	TBX19	T-box 19	0.0612245	0.00806452	0	0
A_16_P00186692	1	chr1_q24.2	165120827	165120886	AK097492	CDNA FLJ40173 fis, clone TESTI2016922	0.0612245	0.00806452	0	0
A_16_P15333616	1	chr1_q24.2	165184691	165184750	AF085892		0.0612245	0.00806452	0	0
A_16_P15333750	1	chr1_q24.2	165237097	165237156	XCL2	chemokine (C motif) ligand 2	0.0612245	0.00806452	0	0
A_14_P102758	1	chr1_q24.2	165279288	165279347	XCL1	chemokine (C motif) ligand 1	0.0612245	0.00806452	0	0
A_14_P138483	1	chr1_q24.2	165429075	165429134	DPT	dermatopontin	0.0612245	0.00806452	0	0
A_14_P202365	1	chr1_q24.2	165493318	165493377	MGC4473	hypothetical protein MGC4473	0.0612245	0.00806452	0	0
A_14_P115199	1	chr1_q24.2	165778527	165778586	BC041008	CDNA clone IMAGE:5284522	0.0612245	0.00806452	0	0
A_16_P00187761	1	chr1_q24.2	165825195	165825254	ATP1B1	ATPase, Na+/K+ transporting, beta 1 polypeptide	0.0612245	0.00806452	0	0
A_14_P116551	1	chr1_q24.2	166064793	166064852	NME7	non-metastatic cells 7, protein expressed in (nucleoside-diphosphate kinase)	0.0612245	0.00806452	0	0
A_14_P200046	1	chr1_q24.2	166097020	166097079	BLZF1	basic leucine zipper nuclear factor 1 (JEM-1)	0.0612245	0.00806452	0	0
A_16_P15335891	1	chr1_q24.2	166121595	166121654	C1orf114	chromosome 1 open reading frame 114	0.0612245	0.00806452	0	0
A_16_P15335949	1	chr1_q24.2	166155150	166155209	BC041451	Homo sapiens, clone IMAGE:5172314, mRNA	0.0612245	0.00806452	0	0
A_16_P15336038	1	chr1_q24.2	166183924	166183983	SLC19A2	solute carrier family 19 (thiamine transporter), member 2	0.0612245	0.00806452	0	0
A_16_P15336283	1	chr1_q24.2	166279488	166279547	F5	coagulation factor V (proaccelerin, labile factor)	0.0612245	0.00806452	0	0
A_14_P111462	1	chr1_q24.2	166324880	166324939	SELP	selectin P (granule membrane protein 140kDa, antigen CD62)	0.0612245	0.00806452	0	0
A_16_P35351732	1	chr1_q24.2	166372743	166372802	AK127098		0.0612245	0.00806452	0	0
A_14_P101289	1	chr1_q24.2	166404041	166404100	SELL	selectin L (lymphocyte adhesion molecule 1)	0.0612245	0.00806452	0	0
A_14_P132506	1	chr1_q24.2	166428512	166428563	SELE	selectin E (endothelial adhesion molecule 1)	0.0612245	0.00806452	0	0
A_14_P116543	1	chr1_q24.2	166495325	166495384	C1orf156	chromosome 1 open reading frame 156	0.0612245	0.00806452	0	0
A_14_P117149	1	chr1_q24.2	166553877	166553936	C1orf112	chromosome 1 open reading frame 112	0.0612245	0.00806452	0	0
A_16_P15337030	1	chr1_q24.2	166591491	166591550	SCYL3	SCY1-like 3 (S. cerevisiae)	0.0612245	0.00806452	0	0
A_14_P102376	1	chr1_q24.2	166773414	166773473	KIFAP3	kinesin-associated protein 3	0.0612245	0.00806452	0	0
A_16_P15337884	1	chr1_q24.2	166963233	166963292	RP11-297H3.4	hypothetical protein LOC284688	0.0612245	0.00806452	0	0
A_16_P35353682	1	chr1_q24.2	167215443	167215502	AK096329		0.0612245	0.00806452	0	0
A_16_P15338470	1	chr1_q24.2	167253784	167253843	SCYL1BP1	SCY1-like 1 binding protein 1	0.0612245	0.00806452	0	0
A_16_P15338640	1	chr1_q24.2	167338596	167338655	AK056067		0.0612245	0.00806452	0	0
A_16_P15338957	1	chr1_q24.2	167438250	167438309	PRRX1	paired related homeobox 1	0.0612245	0.00806452	0	0
A_16_P00190329	1	chr1_q24.3	167698927	167698986	C1orf129	chromosome 1 open reading frame 129	0.0612245	0.00806452	0	0
A_14_P130322	1	chr1_q24.3	167816847	167816906	FMO3	flavin containing monooxygenase 3	0.0612245	0.00806452	0	0
A_16_P15339824	1	chr1_q24.3	167862431	167862490	FMO6P	flavin containing monooxygenase 6 pseudogene	0.0612245	0.00806452	0	0
A_14_P122882	1	chr1_q24.3	167906465	167906524	FMO2	flavin containing monooxygenase 2 (non-functional)	0.0408163	0.00806452	0	0
A_14_P101997	1	chr1_q24.3	167986514	167986573	FMO1	flavin containing monooxygenase 1	0.0408163	0.00806452	0	0
A_14_P120987	1	chr1_q24.3	168042551	168042610	FMO4	flavin containing monooxygenase 4	0.0408163	0.00806452	0	0
A_14_P133961	1	chr1_q24.3	168284871	168284930	BAT2D1	BAT2 domain containing 1	0.0408163	0.00806452	0	0
A_16_P15340792	1	chr1_q24.3	168347624	168347683	MYOC	myocilin, trabecular meshwork inducible glucocorticoid response	0.0408163	0.00806452	0	0
A_16_P00191171	1	chr1_q24.3	168439198	168439257	VAMP4	vesicle-associated membrane protein 4	0.0408163	0.00806452	0	0
A_16_P15341131	1	chr1_q24.3	168497862	168497921	KIAA0859	KIAA0859	0.0408163	0.00806452	0	0
A_16_P15342607	1	chr1_q24.3	169109616	169109675	DNM3	dynamin 3	0.0408163	0.00806452	0	0
A_14_P125792	1	chr1_q24.3	169144031	169144090	PIGC	phosphatidylinositol glycan anchor biosynthesis, class C	0.0408163	0.00806452	0	0
A_16_P15342767	1	chr1_q24.3	169169470	169169529	C1orf105	chromosome 1 open reading frame 105	0.0408163	0.00806452	0	0
A_14_P137383	1	chr1_q24.3	169311583	169311642	C1orf9	chromosome 1 open reading frame 9	0.0408163	0.00806452	0	0
A_14_P105867	1	chr1_q24.3	169366838	169366897	FASLG	Fas ligand (TNF superfamily, member 6)	0.0408163	0.00806452	0	0
A_14_P202112	1	chr1_q25.1	169749119	169749178	TNFSF18	tumor necrosis factor (ligand) superfamily, member 18	0.0408163	0.00806452	0	0
A_14_P138781	1	chr1_q25.1	169906082	169906133	TNFSF4	tumor necrosis factor (ligand) superfamily, member 4 (tax-transcriptionally activated glycoprotein 1, 34kDa)	0.0408163	0.00806452	0	0
A_16_P15344747	1	chr1_q25.1	170104291	170104350	AK127238		0.0408163	0.00806452	0	0
A_16_P15344865	1	chr1_q25.1	170153129	170153188	LOC646870	hypothetical protein LOC646870	0.0408163	0.00806452	0	0
A_14_P114905	1	chr1_q25.1	170188979	170189038	PRDX6	peroxiredoxin 6	0.0408163	0.00806452	0	0
A_14_P134179	1	chr1_q25.1	170302599	170302658	SLC9A11	solute carrier family 9, member 11	0.0408163	0.00806452	0	0
A_16_P35360758	1	chr1_q25.1	170359844	170359903	ANKRD45		0.0408163	0.00806452	0	0
A_14_P128697	1	chr1_q25.1	170486013	170486072	KLHL20	kelch-like 20 (Drosophila)	0.0408163	0.00806452	0	0
A_16_P15345460	1	chr1_q25.1	170519011	170519070	CENPL	centromere protein L	0.0408163	0.00806452	0	0
A_14_P133617	1	chr1_q25.1	170558282	170558341	DARS2	aspartyl-tRNA synthetase 2, mitochondrial	0.0408163	0.00806452	0	0
A_16_P00193930	1	chr1_q25.1	170564301	170564360	GAS5	growth arrest-specific 5	0.0408163	0.00806452	0	0
A_14_P200047	1	chr1_q25.1	170572463	170572522	ZBTB37	zinc finger and BTB domain containing 37	0.0408163	0.00806452	0	0
A_16_P15345621	1	chr1_q25.1	170578091	170578150	AK057310		0.0408163	0.00806452	0	0
A_14_P128174	1	chr1_q25.1	170615914	170615973	SERPINC1	serpin peptidase inhibitor, clade C (antithrombin), member 1	0.0408163	0.00806452	0	0
A_16_P35361485	1	chr1_q25.1	170681571	170681630	RC3H1	ring finger and CCCH-type zinc finger domains 1	0.0408163	0.00806452	0	0
A_16_P15345937	1	chr1_q25.1	170700377	170700436	AF130100		0.0408163	0.00806452	0	0
A_16_P00194184	1	chr1_q25.1	170718676	170718735	KIAA0492	KIAA0492 protein	0.0408163	0.00806452	0	0
A_14_P125407	1	chr1_q25.1	171693506	171693565	RABGAP1L	RAB GTPase activating protein 1-like	0.0408163	0.00806452	0	0
A_16_P35363590	1	chr1_q25.1	171711612	171711671	CACYBP	calcyclin binding protein	0.0408163	0.00806452	0	0
A_16_P15347997	1	chr1_q25.1	171724200	171724254	MRPS14	mitochondrial ribosomal protein S14	0.0408163	0.00806452	0	0
A_16_P00195539	1	chr1_q25.1	171845188	171845247	TNN	tenascin N	0.0408163	0.00806452	0	0
A_14_P106401	1	chr1_q25.1	171890938	171890997	KIAA0040	KIAA0040	0.0408163	0.00806452	0	0
A_16_P15348660	1	chr1_q25.1	172019216	172019275	AB007979	Homo sapiens, clone IMAGE:4915189, mRNA	0.0408163	0.00806452	0	0
A_16_P15349927	1	chr1_q25.1	172436400	172436459	TNR	tenascin R (restrictin, janusin)	0.0408163	0.016129	0	0
A_16_P35366668	1	chr1_q25.1	172902267	172902326	RFWD2	ring finger and WD repeat domain 2	0.0408163	0.00806452	0	0
A_14_P114420	1	chr1_q25.2	173543324	173543383	PAPPA2	pappalysin 2	0.0408163	0.00806452	0	0
A_16_P00198642	1	chr1_q25.2	173860085	173860144	ASTN1	astrotactin 1	0.0408163	0.00806452	0	0
A_14_P121334	1	chr1_q25.2	173983060	173983119	FAM5B	family with sequence similarity 5, member B	0.0408163	0.00806452	0	0
A_14_P102940	1	chr1_q25.2	174060399	174060458	LOC400796	hypothetical LOC400796	0.0408163	0.00806452	0	0
A_16_P15354664	1	chr1_q25.2	174409340	174409399	BC031234	CDNA clone IMAGE:4838218	0.0408163	0.00806452	0	0
A_16_P00199837	1	chr1_q25.2	174668464	174668522	SEC16B	SEC16 homolog B (S. cerevisiae)	0.0204082	0.00806452	0	0
A_16_P35371204	1	chr1_q25.2	174695366	174695425	AB067515		0.0204082	0.00806452	0	0
A_14_P108182	1	chr1_q25.2	174706517	174706576	LOC730102	hypothetical protein LOC730102	0.0204082	0.00806452	0	0
A_14_P128242	1	chr1_q25.2	175174711	175174770	RASAL2		0.0204082	0.00806452	0	0
A_16_P00200581	1	chr1_q25.2	175194706	175194765	FLJ44005		0.0204082	0.00806452	0	0
A_14_P122374	1	chr1_q25.2	175222626	175222685	C1orf49	chromosome 1 open reading frame 49	0.0204082	0.00806452	0	0
A_16_P00200648	1	chr1_q25.2	175233625	175233681	AK097518		0.0204082	0.00806452	0	0
A_14_P200048	1	chr1_q25.2	175249343	175249402	C1orf220	chromosome 1 open reading frame 220	0.0204082	0.00806452	0	0
A_14_P101158	1	chr1_q25.2	175617403	175617462	RALGPS2	Ral GEF with PH domain and SH3 binding motif 2	0.0204082	0.00806452	0	0
A_16_P35373779	1	chr1_q25.2	175773677	175773736	FAM20B	family with sequence similarity 20, member B	0.0204082	0.00806452	0	0
A_14_P116182	1	chr1_q25.2	175794871	175794926	TOR3A	torsin family 3, member A	0.0204082	0.00806452	0	0
A_16_P00201564	1	chr1_q25.2	175927859	175927918	ABL2	v-abl Abelson murine leukemia viral oncogene homolog 2 (arg, Abelson-related gene)	0.0204082	0.00806452	0	0
A_16_P35374484	1	chr1_q25.2	176055029	176055088	SOAT1		0.0204082	0.00806452	0	0
A_14_P111645	1	chr1_q25.2	176255407	176255466	C1orf125	chromosome 1 open reading frame 125	0.0204082	0.00806452	0	0
A_14_P108691	1	chr1_q25.2	176275366	176275425	NPHS2	nephrosis 2, idiopathic, steroid-resistant (podocin)	0.0204082	0.00806452	0	0
A_14_P126409	1	chr1_q25.2	176391797	176391856	TDRD5		0.0204082	0.00806452	0	0
A_14_P130487	1	chr1_q25.2	176516945	176517004	C1orf76	Chromosome 1 open reading frame 76	0.0204082	0.00806452	0	0
A_16_P35375529	1	chr1_q25.2	176561901	176561960	TOR1AIP2	torsin A interacting protein 2	0.0204082	0.00806452	0	0
A_16_P00202303	1	chr1_q25.2	176577965	176578024	IFRG15	interferon responsive gene 15	0.0204082	0.00806452	0	0
A_16_P15359653	1	chr1_q25.2	176619044	176619103	TOR1AIP1	torsin A interacting protein 1	0.0204082	0.00806452	0	0
A_16_P00202652	1	chr1_q25.2	176812354	176812413	CEP350		0.0204082	0.00806452	0	0
A_16_P35376390	1	chr1_q25.2	176884208	176884267	QSOX1	quiescin Q6 sulfhydryl oxidase 1	0.0204082	0.00806452	0	0
A_14_P138336	1	chr1_q25.2	176899251	176899297	FLJ23867	hypothetical protein FLJ23867	0.0204082	0.00806452	0	0
A_14_P116523	1	chr1_q25.2	176972225	176972269	LHX4	LIM homeobox 4	0.0204082	0.00806452	0	0
A_14_P120887	1	chr1_q25.2	177196283	177196342	ACBD6	acyl-Coenzyme A binding domain containing 6	0.0204082	0.00806452	0	0
A_14_P132482	1	chr1_q25.3	177586263	177586322	XPR1	xenotropic and polytropic retrovirus receptor	0.0204082	0.00806452	0	0
A_14_P131176	1	chr1_q25.3	177645629	177645676	KIAA1614	KIAA1614	0.0204082	0.00806452	0	0
A_14_P103599	1	chr1_q25.3	177722499	177722558	STX6	syntaxin 6	0.0204082	0.00806452	0	0
A_14_P109497	1	chr1_q25.3	177756772	177756831	MR1	major histocompatibility complex, class I-related	0.0204082	0.00806452	0	0
A_14_P113088	1	chr1_q25.3	177791410	177791468	IER5	immediate early response 5	0.0204082	0.00806452	0	0
A_16_P35378937	1	chr1_q25.3	177937349	177937408	AF387616		0.0204082	0.00806452	0	0
A_16_P00205110	1	chr1_q25.3	178498121	178498180	CACNA1E	calcium channel, voltage-dependent, R type, alpha 1E subunit	0.0204082	0.00806452	0	0
A_16_P15364669	1	chr1_q25.3	178761588	178761647	ZNF648		0.0204082	0.00806452	0	0
A_16_P00205343	1	chr1_q25.3	178766849	178766908	AK055155		0.0204082	0.00806452	0	0
A_16_P35381315	1	chr1_q25.3	178934461	178934520	AK128015		0.0204082	0.00806452	0	0
A_16_P35382252	1	chr1_q25.3	179325186	179325245	GLUL	glutamate-ammonia ligase (glutamine synthetase)	0.0204082	0	0	0
A_16_P15366122	1	chr1_q25.3	179373551	179373610	RGS8	regulator of G-protein signaling 8	0.0204082	0.00806452	0	0
A_16_P00206456	1	chr1_q25.3	179526566	179526625	NPL	N-acetylneuraminate pyruvate lyase (dihydrodipicolinate synthase)	0.0204082	0.00806452	0	0
A_16_P15366558	1	chr1_q25.3	179532895	179532953	LOC647070	hypothetical LOC647070	0.0204082	0.00806452	0	0
A_16_P15366693	1	chr1_q25.3	179581225	179581284	DHX9	DEAH (Asp-Glu-Ala-His) box polypeptide 9	0.0204082	0.00806452	0	0
A_14_P139468	1	chr1_q25.3	179652142	179652201	C1orf14	chromosome 1 open reading frame 14	0.0204082	0.00806452	0	0
A_14_P118994	1	chr1_q25.3	179845814	179845873	LAMC1	laminin, gamma 1 (formerly LAMB2)	0.0204082	0.016129	0	0
A_14_P135136	1	chr1_q25.3	179879654	179879713	LAMC2	laminin, gamma 2	0.0204082	0.016129	0	0
A_16_P15368055	1	chr1_q25.3	180116181	180116240	NMNAT2	nicotinamide nucleotide adenylyltransferase 2	0.0204082	0.00806452	0	0
A_14_P110947	1	chr1_q25.3	180163365	180163424	DKFZP564C196	DKFZP564C196 protein	0.0204082	0.00806452	0	0
A_16_P35384831	1	chr1_q25.3	180250517	180250576	SMG7	---	0.0204082	0.00806452	0	0
A_14_P102742	1	chr1_q25.3	180285845	180285904	NCF2	neutrophil cytosolic factor 2 (65kDa, chronic granulomatous disease, autosomal 2)	0.0204082	0.00806452	0	0
A_16_P15368659	1	chr1_q25.3	180335230	180335289	ARPC5	actin related protein 2/3 complex, subunit 5, 16kDa	0.0204082	0.00806452	0	0
A_16_P15368681	1	chr1_q25.3	180342815	180342874	RGL1		0.0204082	0.00806452	0	0
A_16_P35385139	1	chr1_q25.3	180349225	180349284	APOBEC4	apolipoprotein B mRNA editing enzyme, catalytic polypeptide-like 4 (putative)	0.0204082	0.00806452	0	0
A_16_P35386151	1	chr1_q25.3	180731239	180731298	GLT25D2	glycosyltransferase 25 domain containing 2	0.0204082	0.00806452	0	0
A_16_P00208391	1	chr1_q25.3	180774200	180774259	C1orf19	chromosome 1 open reading frame 19	0.0204082	0.00806452	0	0
A_14_P139662	1	chr1_q25.3	181324853	181324912	C1orf21	chromosome 1 open reading frame 21	0.0408163	0.00806452	0	0
A_14_P101734	1	chr1_q25.3	181454768	181454827	EDEM3	ER degradation enhancer, mannosidase alpha-like 3	0.0204082	0.00806452	0	0
A_16_P00209756	1	chr1_q25.3	181673420	181673479	FAM129A	family with sequence similarity 129, member A	0.0204082	0.00806452	0	0
A_16_P35388912	1	chr1_q25.3	181798793	181798852	RNF2	ring finger protein 2	0.0204082	0.00806452	0	0
A_14_P139076	1	chr1_q25.3	181857631	181857687	C1orf25	chromosome 1 open reading frame 25	0.0204082	0.00806452	0	0
A_16_P15372764	1	chr1_q25.3	181977406	181977465	C1orf26	chromosome 1 open reading frame 26	0.0204082	0.00806452	0	0
A_14_P201575	1	chr1_q25.3	182014657	182014716	IVNS1ABP	influenza virus NS1A binding protein	0.0204082	0.00806452	0	0
A_16_P15372897	1	chr1_q25.3	182024454	182024513	AF508904	Clone IMAGp998D064417Q2 mRNA sequence	0.0204082	0.00806452	0	0
A_16_P35389532	1	chr1_q25.3	182035656	182035715	AF508905	Clone IMAGp998D064417Q2 mRNA sequence	0.0204082	0.00806452	0	0
A_16_P00210655	1	chr1_q25.3	182323563	182323622	AF508906		0.0204082	0.00806452	0	0
A_14_P112274	1	chr1_q31.1	182845174	182845233	HMCN1		0.0204082	0.00806452	0	0
A_14_P137921	1	chr1_q31.1	183009892	183009951	PRG4	proteoglycan 4	0.0204082	0	0	0
A_16_P00211870	1	chr1_q31.1	183074215	183074274	TPR	translocated promoter region (to activated MET oncogene)	0.0204082	0	0	0
A_16_P15375701	1	chr1_q31.1	183116291	183116350	C1orf27	chromosome 1 open reading frame 27	0.0204082	0	0	0
A_16_P15375808	1	chr1_q31.1	183158605	183158664	PDC	phosducin	0.0204082	0	0	0
A_14_P202164	1	chr1_q31.1	183379931	183379990	PTGS2	prostaglandin-endoperoxide synthase 2 (prostaglandin G/H synthase and cyclooxygenase)	0.0204082	0	0	0
A_14_P118647	1	chr1_q31.1	183689150	183689209	PLA2G4A	phospholipase A2, group IVA (cytosolic, calcium-dependent)	0.0204082	0	0	0
A_16_P35395346	1	chr1_q31.1	184344524	184344583	C1orf99	chromosome 1 open reading frame 99	0.0204082	0.00806452	0	0
A_16_P00217520	1	chr1_q31.1	187178260	187178319	FAM5C	family with sequence similarity 5, member C	0.0204082	0	0	0
A_16_P35402565	1	chr1_q31.1	187466198	187466257	BC042042		0.0204082	0	0	0
A_14_P102910	1	chr1_q31.1	187502078	187502137	LOC440704	hypothetical gene supported by BC042042	0.0204082	0	0	0
A_16_P15388232	1	chr1_q31.2	188707871	188707930	BC042094		0.0204082	0	0	0
A_14_P202283	1	chr1_q31.2	188885210	188885269	RGS18	regulator of G-protein signaling 18	0.0204082	0	0	0
A_16_P15389131	1	chr1_q31.2	189067678	189067737	RGS21		0.0204082	0	0	0
A_14_P123371	1	chr1_q31.2	189279992	189280051	RGS1	regulator of G-protein signaling 1	0.0204082	0	0	0
A_16_P35406713	1	chr1_q31.2	189360977	189361036	RGS13	regulator of G-protein signaling 13	0.0204082	0	0	0
A_14_P131833	1	chr1_q31.2	189511954	189512013	RGS2	regulator of G-protein signaling 2, 24kDa	0.0204082	0	0	0
A_16_P00220951	1	chr1_q31.2	189759138	189759197	UCHL5	ubiquitin carboxyl-terminal hydrolase L5	0.0204082	0	0	0
A_14_P129953	1	chr1_q31.2	189792428	189792487	TROVE2	TROVE domain family, member 2	0.0204082	0	0	0
A_16_P35407808	1	chr1_q31.2	189806574	189806633	GLRX2	glutaredoxin 2	0.0204082	0	0	0
A_14_P106218	1	chr1_q31.2	189951899	189951958	CDC73	cell division cycle 73, Paf1/RNA polymerase II complex component, homolog (S. cerevisiae)	0.0204082	0	0	0
A_16_P15398810	1	chr1_q31.3	193308702	193308761	KCNT2	potassium channel, subfamily T, member 2	0.0204082	0	0	0
A_16_P35415994	1	chr1_q31.3	193443252	193443311	CFH	complement factor H	0.0204082	0	0	0
A_16_P00225921	1	chr1_q31.3	193470554	193470613	CFHR1	Complement factor H-related 1	0.0204082	0	0.0408163	0.0645161
A_16_P00225941	1	chr1_q31.3	193491737	193491796	CFHR3	complement factor H-related 3	0.0204082	0	0.0408163	0.0645161
A_14_P113247	1	chr1_q31.3	193614996	193615055	CFHR4	complement factor H-related 4	0.0204082	0	0	0
A_14_P108283	1	chr1_q31.3	193659769	193659828	CFHR2	complement factor H-related 2	0.0204082	0	0	0
A_16_P15399673	1	chr1_q31.3	193710137	193710196	CFHR5	complement factor H-related 5	0.0204082	0	0	0
A_16_P35416734	1	chr1_q31.3	193767950	193768009	F13B	coagulation factor XIII, B polypeptide	0.0204082	0	0	0
A_14_P116236	1	chr1_q31.3	193843232	193843291	ASPM	asp (abnormal spindle) homolog, microcephaly associated (Drosophila)	0.0204082	0	0	0
A_14_P105959	1	chr1_q31.3	193901152	193901210	ZBTB41		0.0204082	0	0	0
A_14_P112401	1	chr1_q31.3	194178811	194178870	CRB1	crumbs homolog 1 (Drosophila)	0.0204082	0	0	0
A_14_P114088	1	chr1_q31.3	194278504	194278563	C1orf218	chromosome 1 open reading frame 218	0.0204082	0	0	0
A_14_P133694	1	chr1_q31.3	194475449	194475508	DENND1B	DENN/MADD domain containing 1B	0.0204082	0	0	0
A_16_P15401792	1	chr1_q31.3	194607927	194607986	C1orf53	chromosome 1 open reading frame 53	0.0204082	0	0	0
A_16_P15401877	1	chr1_q31.3	194630289	194630348	LHX9	LIM homeobox 9	0.0408163	0	0	0
A_16_P35419605	1	chr1_q31.3	194921340	194921399	CR614163		0.0408163	0	0	0
A_14_P117789	1	chr1_q31.3	194997907	194997966	NEK7		0.0408163	0.00806452	0	0
A_16_P00228262	1	chr1_q31.3	195125201	195125260	PTPRC	protein tyrosine phosphatase, receptor type, C	0.0408163	0.00806452	0	0
A_16_P35421827	1	chr1_q31.3	195716545	195716604	BC040869	Homo sapiens, clone IMAGE:5583320, mRNA	0.0408163	0.00806452	0	0
A_16_P35422676	1	chr1_q31.3	196080735	196080794	AK125573		0.0408163	0.00806452	0	0
A_14_P202308	1	chr1_q32.1	196876553	196876612	NR5A2	nuclear receptor subfamily 5, group A, member 2	0.0408163	0	0	0
A_16_P15407924	1	chr1_q32.1	197074345	197074404	BC040731		0.0408163	0	0	0
A_14_P119977	1	chr1_q32.1	197107842	197107901	ZNF281	Zinc finger protein 281	0.0408163	0	0	0
A_14_P130355	1	chr1_q32.1	197318869	197318928	KIF14	kinesin family member 14	0.0408163	0	0	0
A_14_P134447	1	chr1_q32.1	197367112	197367171	DDX59	DEAD (Asp-Glu-Ala-Asp) box polypeptide 59	0.0408163	0	0	0
A_16_P35425840	1	chr1_q32.1	197379844	197379903	BC042016	CDNA clone IMAGE:5311608	0.0408163	0	0	0
A_16_P15409152	1	chr1_q32.1	197558801	197558860	CAMSAP1L1		0.0408163	0	0	0
A_16_P15409191	1	chr1_q32.1	197572542	197572601	GPR25	G protein-coupled receptor 25	0.0204082	0	0	0
A_14_P125493	1	chr1_q32.1	197613189	197613248	C1orf106	chromosome 1 open reading frame 106	0.0204082	0	0	0
A_16_P00231960	1	chr1_q32.1	197715665	197715724	KIF21B	kinesin family member 21B	0.0204082	0	0	0
A_16_P00231987	1	chr1_q32.1	197727360	197727419	AK022893	Homo sapiens, clone IMAGE:4214313, mRNA	0.0204082	0	0	0
A_16_P00232222	1	chr1_q32.1	197852558	197852616	TMEM9	transmembrane protein 9	0.0204082	0	0	0
A_16_P15410017	1	chr1_q32.1	197870944	197871003	AY359012		0.0204082	0	0	0
A_16_P00232285	1	chr1_q32.1	197892030	197892089	BC033185		0.0204082	0	0	0
A_16_P00232360	1	chr1_q32.1	197929690	197929749	DKFZp434B1231	EEF1A2 binding protein	0.0204082	0	0	0
A_14_P111437	1	chr1_q32.1	198024769	198024828	PKP1	plakophilin 1 (ectodermal dysplasia/skin fragility syndrome)	0.0204082	0	0	0
A_14_P135734	1	chr1_q32.1	198074022	198074068	TNNT2	troponin T type 2 (cardiac)	0.0204082	0	0	0
A_14_P110906	1	chr1_q32.1	198098460	198098518	LAD1	ladinin 1	0.0204082	0	0	0
A_14_P111016	1	chr1_q32.1	198119669	198119728	TNNI1	troponin I type 1 (skeletal, slow)	0.0204082	0	0	0
A_16_P35428031	1	chr1_q32.1	198124311	198124370	AK123965		0.0204082	0	0	0
A_14_P123682	1	chr1_q32.1	198168603	198168662	PHLDA3	pleckstrin homology-like domain, family A, member 3	0.0204082	0	0	0
A_16_P00232755	1	chr1_q32.1	198176102	198176161	AK130802		0.0204082	0	0	0
A_16_P00232808	1	chr1_q32.1	198205191	198205250	CSRP1	cysteine and glycine-rich protein 1	0.0204082	0	0	0
A_16_P15411001	1	chr1_q32.1	198214585	198214644	AK097932		0.0204082	0	0	0
A_16_P15411012	1	chr1_q32.1	198222534	198222593	AK055590		0.0204082	0	0	0
A_16_P00233347	1	chr1_q32.1	198522687	198522746	NAV1		0.0204082	0.00806452	0	0
A_16_P00233463	1	chr1_q32.1	198583971	198584030	IPO9		0.0204082	0.00806452	0	0
A_16_P00233479	1	chr1_q32.1	198591501	198591560	TMEM58	transmembrane protein 58	0.0204082	0.00806452	0	0
A_16_P00233561	1	chr1_q32.1	198645843	198645902	LMOD1	leiomodin 1 (smooth muscle)	0.0204082	0.00806452	0	0
A_16_P00233672	1	chr1_q32.1	198717830	198717889	ELF3	E74-like factor 3 (ets domain transcription factor, epithelial-specific )	0.0204082	0.00806452	0	0
A_16_P00233761	1	chr1_q32.1	198809705	198809764	AK129946		0.0204082	0.016129	0	0
A_16_P00233772	1	chr1_q32.1	198816324	198816383	GPR37L1	G protein-coupled receptor 37 like 1	0.0204082	0.016129	0	0
A_14_P127784	1	chr1_q32.1	198830249	198830300	LOC284570	hypothetical protein LOC284570	0.0204082	0.00806452	0	0
A_14_P130083	1	chr1_q32.1	198839858	198839917	ARL8A	ADP-ribosylation factor-like 8A	0.0204082	0.00806452	0	0
A_14_P201961	1	chr1_q32.1	198860435	198860490	PTPN7	protein tyrosine phosphatase, non-receptor type 7	0.0204082	0.00806452	0	0
A_16_P15412718	1	chr1_q32.1	198880213	198880272	AJ629456		0.0204082	0.00806452	0	0
A_16_P00234090	1	chr1_q32.1	199016372	199016431	LGR6	leucine-rich repeat-containing G protein-coupled receptor 6	0.0204082	0.00806452	0	0
A_16_P15413171	1	chr1_q32.1	199041703	199041762	UBE2T	ubiquitin-conjugating enzyme E2T (putative)	0.0204082	0.00806452	0	0
A_16_P15413205	1	chr1_q32.1	199054142	199054201	PPP1R12B	protein phosphatase 1, regulatory (inhibitor) subunit 12B	0.0204082	0.00806452	0	0
A_16_P00234365	1	chr1_q32.1	199294243	199294302	AF093822		0	0.00806452	0	0
A_14_P108227	1	chr1_q32.1	199407549	199407608	SYT2		0.0204082	0.00806452	0	0
A_14_P113742	1	chr1_q32.1	199509421	199509480	JARID1B	jumonji, AT rich interactive domain 1B	0.0204082	0.00806452	0	0
A_16_P15414598	1	chr1_q32.1	199573722	199573781	LOC148709	actin pseudogene	0.0204082	0.00806452	0	0
A_14_P120503	1	chr1_q32.1	199589065	199589124	RABIF	RAB interacting factor	0.0204082	0.00806452	0	0
A_16_P35432249	1	chr1_q32.1	199625983	199626042	KLHL12	kelch-like 12 (Drosophila)	0.0204082	0.00806452	0	0
A_16_P35432322	1	chr1_q32.1	199654390	199654449	ADIPOR1	adiponectin receptor 1	0.0204082	0.00806452	0	0
A_14_P109192	1	chr1_q32.1	199666576	199666635	CYB5R1	cytochrome b5 reductase 1	0.0204082	0.00806452	0	0
A_16_P35432495	1	chr1_q32.1	199721512	199721571	TMEM183A	transmembrane protein 183A	0.0204082	0.016129	0	0
A_16_P00235105	1	chr1_q32.1	199778179	199778238	PPFIA4	protein tyrosine phosphatase, receptor type, f polypeptide (PTPRF), interacting protein (liprin), alpha 4	0.0204082	0.016129	0	0
A_14_P113133	1	chr1_q32.1	199783993	199784049	MYOG	myogenin (myogenic factor 4)	0.0204082	0.016129	0	0
A_16_P00235238	1	chr1_q32.1	199863393	199863452	ADORA1	adenosine A1 receptor	0.0204082	0.016129	0	0
A_14_P113229	1	chr1_q32.1	199874862	199874917	MYBPH	myosin binding protein H	0.0204082	0.016129	0	0
A_16_P00235292	1	chr1_q32.1	199886365	199886424	CHI3L1	chitinase 3-like 1 (cartilage glycoprotein-39)	0.0204082	0.016129	0	0
A_16_P00235323	1	chr1_q32.1	199904886	199904945	X75546		0.0204082	0.016129	0	0
A_14_P107125	1	chr1_q32.1	199929623	199929682	CHIT1	chitinase 1 (chitotriosidase)	0.0204082	0.016129	0	0
A_16_P35433302	1	chr1_q32.1	199999436	199999495	LOC730227	hypothetical protein LOC730227	0.0408163	0.016129	0	0
A_14_P138354	1	chr1_q32.1	200009843	200009902	BTG2	BTG family, member 2	0.0408163	0.016129	0	0
A_16_P00235540	1	chr1_q32.1	200051782	200051840	FMOD	fibromodulin	0.0408163	0.016129	0	0
A_16_P00235732	1	chr1_q32.1	200190816	200190875	PRELP	proline/arginine-rich end leucine-rich repeat protein	0.0408163	0.016129	0	0
A_16_P35433841	1	chr1_q32.1	200206810	200206866	OPTC	opticin	0.0408163	0.016129	0	0
A_16_P35434506	1	chr1_q32.1	200442490	200442549	ATP2B4		0.0408163	0.00806452	0	0
A_14_P108847	1	chr1_q32.1	200475751	200475810	LAX1	lymphocyte transmembrane adaptor 1	0.0408163	0.00806452	0	0
A_14_P112115	1	chr1_q32.1	200552021	200552080	ZC3H11A	zinc finger CCCH-type containing 11A	0.0408163	0.00806452	0	0
A_14_P124920	1	chr1_q32.1	200569199	200569258	SNRPE	small nuclear ribonucleoprotein polypeptide E	0.0408163	0.00806452	0	0
A_14_P103801	1	chr1_q32.1	200737992	200738051	C1orf157		0.0408163	0.016129	0	0
A_16_P00236486	1	chr1_q32.1	200782021	200782080	SOX13	SRY (sex determining region Y)-box 13	0.0408163	0.016129	0	0
A_14_P120854	1	chr1_q32.1	200851511	200851564	ETNK2	ethanolamine kinase 2	0.0408163	0.00806452	0	0
A_14_P101388	1	chr1_q32.1	200864080	200864139	REN	renin	0.0408163	0.00806452	0	0
A_14_P117623	1	chr1_q32.1	200896856	200896912	KISS1	KiSS-1 metastasis-suppressor	0.0408163	0.00806452	0	0
A_16_P00236706	1	chr1_q32.1	200912360	200912419	GOLT1A	golgi transport 1 homolog A (S. cerevisiae)	0.0408163	0.00806452	0	0
A_16_P00236972	1	chr1_q32.1	201050760	201050819	PLEKHA6	pleckstrin homology domain containing, family A member 6	0.0408163	0.00806452	0	0
A_16_P15418304	1	chr1_q32.1	201061757	201061816	LOC127841	hypothetical protein LOC127841	0.0408163	0.00806452	0	0
A_16_P00237058	1	chr1_q32.1	201110709	201110768	PPP1R15B	protein phosphatase 1, regulatory (inhibitor) subunit 15B	0.0408163	0.00806452	0	0
A_16_P15418493	1	chr1_q32.1	201136093	201136152	PIK3C2B	phosphoinositide-3-kinase, class 2, beta polypeptide	0.0408163	0.00806452	0	0
A_16_P15419219	1	chr1_q32.1	201402236	201402295	MDM4	Mdm4, transformed 3T3 cell double minute 4, p53 binding protein (mouse)	0.0204082	0.00806452	0	0
A_16_P00237988	1	chr1_q32.1	201691114	201691173	NFASC		0.0612245	0	0	0
A_16_P15420232	1	chr1_q32.1	201777681	201777740	CNTN2	contactin 2 (axonal)	0.0612245	0	0	0
A_14_P110699	1	chr1_q32.1	201820856	201820915	RBBP5	retinoblastoma binding protein 5	0.0612245	0	0	0
A_16_P00238298	1	chr1_q32.1	201869969	201870028	RIPK5		0.0612245	0	0	0
A_16_P15420745	1	chr1_q32.1	201974094	201974153	TMCC2	transmembrane and coiled-coil domain family 2	0.0408163	0	0	0
A_16_P00238542	1	chr1_q32.1	202019539	202019598	NUAK2	chromosome 11 open reading frame 17	0.0408163	0	0	0
A_16_P00238609	1	chr1_q32.1	202056237	202056296	KLHDC8A	kelch domain containing 8A	0.0612245	0	0	0
A_16_P00238644	1	chr1_q32.1	202082435	202082494	LOC284576	hypothetical protein LOC284576	0.0612245	0	0	0
A_16_P15421088	1	chr1_q32.1	202114983	202115042	LEMD1	LEM domain containing 1	0.0612245	0	0	0
A_16_P15421191	1	chr1_q32.1	202146719	202146778	AK026628		0.0612245	0	0	0
A_16_P15421237	1	chr1_q32.1	202160431	202160489	AK095633		0.0612245	0	0	0
A_16_P15421415	1	chr1_q32.1	202229082	202229141	PCTK3	PCTAIRE protein kinase 3	0.0612245	0	0	0
A_16_P15421485	1	chr1_q32.1	202254008	202254067	LOC284578	hypothetical protein LOC284578	0.0612245	0	0	0
A_16_P15421636	1	chr1_q32.1	202310306	202310365	MFSD4		0.0612245	0	0	0
A_14_P118252	1	chr1_q32.1	202373737	202373796	SLC45A3	solute carrier family 45, member 3	0.0408163	0	0	0
A_14_P133811	1	chr1_q32.1	202447092	202447151	NUCKS1	nuclear casein kinase and cyclin-dependent kinase substrate 1	0.0612245	0	0	0
A_14_P118188	1	chr1_q32.1	202470788	202470847	RAB7L1	RAB7, member RAS oncogene family-like 1	0.0612245	0	0	0
A_16_P00239317	1	chr1_q32.1	202513009	202513068	SLC41A1	solute carrier family 41, member 1	0.0612245	0	0	0
A_14_P137731	1	chr1_q32.1	202528806	202528865	PM20D1	peptidase M20 domain containing 1	0.0612245	0	0	0
A_14_P127966	1	chr1_q32.1	202549082	202549141	FLJ32569		0.0612245	0	0	0
A_16_P00239441	1	chr1_q32.1	202640563	202640620	SLC26A9	solute carrier family 26, member 9	0.0612245	0.00806452	0	0
A_16_P00239519	1	chr1_q32.1	202765185	202765244	AVPR1B	arginine vasopressin receptor 1B	0.0612245	0.00806452	0	0
A_16_P15422774	1	chr1_q32.1	202823062	202823121	C1orf186	chromosome 1 open reading frame 186	0.0612245	0.00806452	0	0
A_16_P00239675	1	chr1_q32.1	202874290	202874349	CTSE	cathepsin E	0.0612245	0.00806452	0	0
A_16_P00239784	1	chr1_q32.1	203025149	203025208	SRGAP2	SLIT-ROBO Rho GTPase activating protein 2	0.0816327	0.016129	0	0
A_16_P15423268	1	chr1_q32.1	203051603	203051662	IKBKE	inhibitor of kappa light polypeptide gene enhancer in B-cells, kinase epsilon	0.0816327	0.016129	0	0
A_16_P35441575	1	chr1_q32.1	203149521	203149580	RASSF5	Ras association (RalGDS/AF-6) domain family 5	0.0816327	0.016129	0	0
A_16_P15423620	1	chr1_q32.1	203171033	203171092	LGTN	ligatin	0.0816327	0.016129	0	0
A_16_P35441842	1	chr1_q32.1	203240156	203240215	DYRK3	dual-specificity tyrosine-(Y)-phosphorylation regulated kinase 3	0.0816327	0.016129	0	0
A_14_P129763	1	chr1_q32.1	203294484	203294543	MAPKAPK2	mitogen-activated protein kinase-activated protein kinase 2	0.0816327	0.016129	0	0
A_14_P128324	1	chr1_q32.1	203333990	203334041	IL10	interleukin 10	0.0816327	0.016129	0	0
A_16_P00240410	1	chr1_q32.1	203388424	203388483	IL19	interleukin 19	0.0816327	0.016129	0	0
A_14_P109657	1	chr1_q32.1	203428036	203428091	IL20	interleukin 20	0.0612245	0.016129	0	0
A_14_P200050	1	chr1_q32.1	203461732	203461791	IL24	interleukin 24	0.0816327	0.016129	0	0
A_16_P35442523	1	chr1_q32.1	203482758	203482817	FAIM3	Fas apoptotic inhibitory molecule 3	0.0816327	0.016129	0	0
A_16_P15424519	1	chr1_q32.1	203506505	203506564	PIGR	polymeric immunoglobulin receptor	0.0816327	0.016129	0	0
A_14_P103597	1	chr1_q32.1	203527991	203528050	FCAMR	Fc receptor, IgA, IgM, high affinity	0.0816327	0.016129	0	0
A_16_P00240746	1	chr1_q32.1	203592928	203592987	C1orf116	chromosome 1 open reading frame 116	0.0816327	0.016129	0	0
A_16_P15424789	1	chr1_q32.2	203605560	203605619	YOD1	YOD1 OTU deubiquinating enzyme 1 homolog (S. cerevisiae)	0.0612245	0.016129	0	0
A_14_P127529	1	chr1_q32.2	203642082	203642141	PFKFB2	6-phosphofructo-2-kinase/fructose-2,6-biphosphatase 2	0.0612245	0.016129	0	0
A_16_P00240879	1	chr1_q32.2	203658310	203658369	C4BPB	complement component 4 binding protein, beta	0.0612245	0.016129	0	0
A_14_P134479	1	chr1_q32.2	203706623	203706682	C4BPA	complement component 4 binding protein, alpha	0.0612245	0.016129	0	0
A_16_P35443696	1	chr1_q32.2	203921571	203921630	CD55	CD55 molecule, decay accelerating factor for complement (Cromer blood group)	0.0612245	0.016129	0	0
A_14_P118290	1	chr1_q32.2	203979657	203979716	FLJ13310	hypothetical protein FLJ13310	0.0612245	0.016129	0	0
A_14_P133087	1	chr1_q32.2	204050784	204050843	CR2	complement component (3d/Epstein Barr virus) receptor 2	0.0612245	0.016129	0	0
A_16_P15425881	1	chr1_q32.2	204085282	204085341	CR1	complement component (3b/4b) receptor 1 (Knops blood group)	0.0612245	0.016129	0	0
A_14_P106089	1	chr1_q32.2	204245435	204245494	CR1L	complement component (3b/4b) receptor 1-like	0.0612245	0.00806452	0	0
A_16_P35444603	1	chr1_q32.2	204274990	204275049	BC109190		0.0612245	0.00806452	0	0
A_16_P15426376	1	chr1_q32.2	204281795	204281854	AY114160		0.0612245	0.00806452	0	0
A_16_P15426531	1	chr1_q32.2	204356257	204356316	CD46	CD46 molecule, complement regulatory protein	0.0612245	0.00806452	0	0
A_16_P15426561	1	chr1_q32.2	204364919	204364978	AK123264		0.0612245	0.00806452	0	0
A_16_P00241811	1	chr1_q32.2	204418397	204418456	LOC148696	hypothetical LOC148696	0.0612245	0.00806452	0	0
A_14_P125046	1	chr1_q32.2	204472923	204472972	CD34	CD34 molecule	0.0612245	0.00806452	0	0
A_16_P15427899	1	chr1_q32.2	204805487	204805538	PLXNA2	plexin A2	0.0612245	0.016129	0	0
A_16_P00244324	1	chr1_q32.2	205990580	205990639	LOC642587	NPC-A-5	0.0408163	0.016129	0	0
A_14_P109728	1	chr1_q32.2	206173989	206174039	CAMK1G		0.0408163	0.016129	0	0
A_14_P125424	1	chr1_q32.2	206212778	206212837	LAMB3	laminin, beta 3	0.0408163	0.016129	0	0
A_14_P127588	1	chr1_q32.2	206237980	206238038	G0S2	Transcribed locus	0.0408163	0.016129	0	0
A_14_P121171	1	chr1_q32.2	206296446	206296504	HSD11B1	Transcribed locus	0.0408163	0.016129	0	0
A_16_P15431767	1	chr1_q32.2	206341015	206341074	TRAF3IP3	TRAF3 interacting protein 3	0.0408163	0.016129	0	0
A_14_P130537	1	chr1_q32.2	206344270	206344329	C1orf74	chromosome 1 open reading frame 74	0.0408163	0.016129	0	0
A_16_P35450228	1	chr1_q32.2	206366195	206366254	IRF6	interferon regulatory factor 6	0.0408163	0.016129	0	0
A_14_P139450	1	chr1_q32.2	206416791	206416850	C1orf107	chromosome 1 open reading frame 107	0.0408163	0.016129	0	0
A_16_P15432429	1	chr1_q32.2	206634430	206634489	SYT14	synaptotagmin XIV	0.0408163	0.0241935	0	0
A_16_P15432776	1	chr1_q32.2	206791876	206791935	C1orf133	chromosome 1 open reading frame 133	0.0408163	0.016129	0	0
A_14_P128677	1	chr1_q32.2	206803380	206803439	SERTAD4	SERTA domain containing 4	0.0408163	0.016129	0	0
A_14_P131922	1	chr1_q32.2	207237768	207237827	HHAT	hedgehog acyltransferase	0.0408163	0.016129	0	0
A_16_P00246196	1	chr1_q32.2	207248465	207248524	KCNH1	potassium voltage-gated channel, subfamily H (eag-related), member 1	0.0408163	0.016129	0	0
A_16_P15435224	1	chr1_q32.3	207876940	207876999	RCOR3	REST corepressor 3	0.0408163	0	0	0
A_16_P35453866	1	chr1_q32.3	207936661	207936720	TRAF5	TNF receptor-associated factor 5	0.0408163	0	0	0
A_14_P135951	1	chr1_q32.3	207994183	207994242	C1orf97	chromosome 1 open reading frame 97	0.0408163	0	0	0
A_16_P35453997	1	chr1_q32.3	208035509	208035568	RD3	retinal degeneration 3	0.0408163	0	0	0
A_16_P35454043	1	chr1_q32.3	208050307	208050363	C1orf36		0.0408163	0	0	0.00806452
A_14_P124186	1	chr1_q32.3	208137749	208137808	SLC30A1	Solute carrier family 30 (zinc transporter), member 1	0.0408163	0	0	0
A_16_P00247405	1	chr1_q32.3	208212248	208212307	CR605189		0.0612245	0	0	0
A_16_P15436007	1	chr1_q32.3	208233008	208233067	NEK2	NIMA (never in mitosis gene a)-related kinase 2	0.0612245	0	0	0
A_16_P15436037	1	chr1_q32.3	208243279	208243338	LOC91548	hypothetical protein LOC91548	0.0612245	0	0	0
A_14_P110503	1	chr1_q32.3	208390826	208390885	LPGAT1	lysophosphatidylglycerol acyltransferase 1	0.0612245	0	0	0
A_16_P00247914	1	chr1_q32.3	208595874	208595933	INTS7	integrator complex subunit 7	0.0408163	0	0	0
A_14_P108506	1	chr1_q32.3	208666099	208666158	DTL	denticleless homolog (Drosophila)	0.0408163	0	0	0
A_16_P15437521	1	chr1_q32.3	208918759	208918818	PPP2R5A	protein phosphatase 2, regulatory subunit B', alpha isoform	0.0408163	0	0	0
A_14_P137557	1	chr1_q32.3	208960116	208960175	C1orf75	chromosome 1 open reading frame 75	0.0408163	0	0	0
A_16_P00248423	1	chr1_q32.3	209007420	209007479	NENF	neuron derived neurotrophic factor	0.0408163	0	0	0
A_16_P00248524	1	chr1_q32.3	209072811	209072870	BC028700	CDNA clone IMAGE:4827786	0.0408163	0	0	0
A_14_P108482	1	chr1_q32.3	209180794	209180840	ATF3		0.0408163	0	0	0
A_14_P128969	1	chr1_q32.3	209188468	209188524	FAM71A	Family with sequence similarity 71, member A	0.0408163	0	0	0
A_14_P101656	1	chr1_q32.3	209256216	209256275	BATF3	basic leucine zipper transcription factor, ATF-like 3	0.0408163	0	0	0
A_16_P35457045	1	chr1_q32.3	209289206	209289265	NSL1	NSL1, MIND kinetochore complex component, homolog (S. cerevisiae)	0.0408163	0	0	0
A_14_P137130	1	chr1_q32.3	209352154	209352213	C1orf48	---	0.0408163	0	0	0
A_16_P15438607	1	chr1_q32.3	209377782	209377841	TATDN3	TatD DNase domain containing 3	0.0408163	0	0	0
A_16_P35457276	1	chr1_q32.3	209409386	209409445	LOC149643	hypothetical LOC149643	0.0408163	0	0	0
A_16_P15438672	1	chr1_q32.3	209415513	209415572	LQK1	LQK1 hypothetical protein short isoform	0.0408163	0	0	0
A_14_P130306	1	chr1_q32.3	209458019	209458078	FLVCR1	feline leukemia virus subgroup C cellular receptor 1	0.0408163	0	0	0
A_16_P15438968	1	chr1_q32.3	209549414	209549473	VASH2	vasohibin 2	0.0408163	0	0	0
A_14_P136174	1	chr1_q32.3	209574698	209574757	ANGEL2	angel homolog 2 (Drosophila)	0.0408163	0	0	0
A_16_P00249501	1	chr1_q32.3	209824475	209824532	RPS6KC1		0.0408163	0	0	0
A_14_P128404	1	chr1_q32.3	210526599	210526658	AK092251	CDNA FLJ34932 fis, clone NT2RP7005631	0.0408163	0	0	0
A_16_P35460088	1	chr1_q41	210538318	210538377	LOC284669	hypothetical protein LOC284669	0.0408163	0	0	0
A_14_P104533	1	chr1_q41	210597588	210597647	PROX1	prospero homeobox 1	0.0408163	0	0	0
A_14_P108715	1	chr1_q41	210898554	210898613	SMYD2	CDNA FLJ12119 fis, clone MAMMA1000092	0.0408163	0	0	0
A_16_P15443071	1	chr1_q41	211110542	211110601	PTPN14	protein tyrosine phosphatase, non-receptor type 14	0.0612245	0	0	0
A_14_P201983	1	chr1_q41	211226166	211226225	CENPF	centromere protein F, 350/400ka (mitosin)	0.0612245	0.00806452	0	0
A_14_P109121	1	chr1_q41	211795590	211795649	KCNK2		0.0612245	0.00806452	0	0
A_14_P127442	1	chr1_q41	212183435	212183494	KCTD3	potassium channel tetramerisation domain containing 3	0.0612245	0.00806452	0	0
A_16_P15447483	1	chr1_q41	212900396	212900455	USH2A	Usher syndrome 2A (autosomal recessive, mild)	0.0612245	0.00806452	0	0
A_16_P15449669	1	chr1_q41	213648592	213648651	ESRRG	estrogen-related receptor gamma	0.0408163	0.00806452	0	0
A_16_P15449795	1	chr1_q41	213690121	213690179	BX647076		0.0408163	0.00806452	0	0
A_16_P15451052	1	chr1_q41	214187067	214187126	GPATCH2	G patch domain containing 2	0.0408163	0.00806452	0	0
A_16_P35470589	1	chr1_q41	214428777	214428836	SPATA17	spermatogenesis associated 17	0.0408163	0.00806452	0	0
A_16_P15451754	1	chr1_q41	214460705	214460764	BC040896	Homo sapiens, clone IMAGE:5742758, mRNA	0.0408163	0.00806452	0	0
A_14_P109765	1	chr1_q41	214611903	214611962	BC039113	CDNA clone IMAGE:4831124	0.0408163	0.00806452	0	0
A_16_P00257655	1	chr1_q41	214892830	214892889	RRP15	ribosomal RNA processing 15 homolog (S. cerevisiae)	0.0408163	0.00806452	0	0
A_14_P120374	1	chr1_q41	215003297	215003356	TGFB2	transforming growth factor, beta 2	0.0408163	0.00806452	0	0
A_16_P35473739	1	chr1_q41	215726528	215726587	BC086863		0.0408163	0.00806452	0	0
A_14_P127881	1	chr1_q41	215772273	215772332	LYPLAL1	lysophospholipase-like 1	0.0408163	0.00806452	0	0
A_16_P00259984	1	chr1_q41	216473796	216473855	AK097467		0.0612245	0.00806452	0	0
A_16_P00260014	1	chr1_q41	216488831	216488890	SLC30A10	solute carrier family 30, member 10	0.0612245	0.00806452	0	0
A_14_P129713	1	chr1_q41	216607379	216607438	EPRS	glutamyl-prolyl-tRNA synthetase	0.0612245	0	0	0.00806452
A_14_P108159	1	chr1_q41	216651182	216651241	BPNT1	3'(2'), 5'-bisphosphate nucleotidase 1	0.0612245	0	0	0.00806452
A_16_P35476158	1	chr1_q41	216665165	216665224	IARS2	isoleucyl-tRNA synthetase 2, mitochondrial	0.0612245	0	0	0.00806452
A_14_P126537	1	chr1_q41	216710157	216710216	AK021928	Full-length cDNA clone CS0DC007YG11 of Neuroblastoma Cot 25-normalized of Homo sapiens (human)	0.0612245	0	0	0
A_14_P129325	1	chr1_q41	216826308	216826367	RAB3GAP2	Full-length cDNA clone CS0DC007YG11 of Neuroblastoma Cot 25-normalized of Homo sapiens (human)	0.0612245	0	0	0
A_14_P100335	1	chr1_q41	217223823	217223882	MARK1	MAP/microtubule affinity-regulating kinase 1	0.0612245	0	0	0
A_14_P135863	1	chr1_q41	217258565	217258624	C1orf115	chromosome 1 open reading frame 115	0.0408163	0	0	0
A_14_P131287	1	chr1_q41	217346415	217346474	MOSC2	MOCO sulphurase C-terminal domain containing 2	0.0408163	0	0	0
A_14_P118184	1	chr1_q41	217375895	217375954	MOSC1	MOCO sulphurase C-terminal domain containing 1	0.0408163	0	0	0
A_14_P108178	1	chr1_q41	217446670	217446716	HLX	H2.0-like homeobox	0.0408163	0	0	0
A_16_P00262598	1	chr1_q41	218299112	218299171	DUSP10	dual specificity phosphatase 10	0.0408163	0	0	0
A_16_P35481127	1	chr1_q41	218693108	218693167	BC023608	CDNA clone IMAGE:4639754	0.0408163	0	0	0
A_16_P35482235	1	chr1_q41	219178531	219178575	MIA3	melanoma inhibitory activity family, member 3	0.0204082	0	0	0
A_14_P115492	1	chr1_q41	219238579	219238638	C1orf80	chromosome 1 open reading frame 80	0.0204082	0	0	0
A_16_P15463513	1	chr1_q41	219300768	219300827	FLJ43505	Transcribed locus	0.0204082	0	0	0
A_14_P127398	1	chr1_q41	219503635	219503694	DISP1	Dispatched homolog 1 (Drosophila)	0.0204082	0	0	0
A_14_P132961	1	chr1_q41	219679851	219679898	SUSD4	sushi domain containing 4	0.0204082	0	0	0
A_14_P129511	1	chr1_q42.12	220656393	220656452	FBXO28	F-box protein 28	0.0204082	0.00806452	0	0
A_14_P118522	1	chr1_q42.12	220683574	220683633	DEGS1	degenerative spermatocyte homolog 1, lipid desaturase (Drosophila)	0.0204082	0.00806452	0	0
A_16_P00264021	1	chr1_q42.12	220690551	220690610	CR623303		0.0204082	0.00806452	0	0
A_16_P15466637	1	chr1_q42.12	220705622	220705681	BC008027	Homo sapiens, clone IMAGE:3608699, mRNA	0.0204082	0.00806452	0	0
A_14_P130313	1	chr1_q42.12	220820832	220820891	NVL	Homo sapiens, clone IMAGE:5580856, mRNA	0.0204082	0.00806452	0	0
A_16_P35486205	1	chr1_q42.12	220870175	220870234	CNIH4	cornichon homolog 4 (Drosophila)	0.0204082	0.00806452	0	0
A_16_P15467118	1	chr1_q42.12	220925894	220925953	WDR26	WD repeat domain 26	0.0204082	0.00806452	0	0
A_14_P100311	1	chr1_q42.12	221234929	221234988	CNIH3	Cornichon homolog 3 (Drosophila)	0.0204082	0.00806452	0	0
A_16_P35487662	1	chr1_q42.12	221518162	221518221	C1orf67	chromosome 1 open reading frame 67	0	0.00806452	0	0
A_16_P35487790	1	chr1_q42.12	221633825	221633884	DNAH14	dynein, axonemal, heavy chain 14	0	0.00806452	0	0
A_16_P15468889	1	chr1_q42.12	221877658	221877717	CR936804		0	0.00806452	0	0
A_14_P125613	1	chr1_q42.12	221923211	221923260	LBR	lamin B receptor	0	0.00806452	0	0
A_16_P15469588	1	chr1_q42.12	222144531	222144590	ENAH	enabled homolog (Drosophila)	0	0.00806452	0	0
A_16_P15469808	1	chr1_q42.12	222245915	222245974	AK124056		0	0.00806452	0	0
A_14_P101132	1	chr1_q42.12	222284702	222284761	SRP9	signal recognition particle 9kDa	0	0.00806452	0	0
A_16_P15469940	1	chr1_q42.12	222310055	222310114	CR593306		0	0.00806452	0	0
A_14_P138423	1	chr1_q42.12	222339964	222340018	EPHX1	epoxide hydrolase 1, microsomal (xenobiotic)	0	0.00806452	0	0
A_16_P00266111	1	chr1_q42.12	222374303	222374361	TMEM63A	transmembrane protein 63A	0	0.00806452	0	0
A_14_P133987	1	chr1_q42.12	222382826	222382879	LEFTY1	left-right determination factor 1	0	0.00806452	0	0
A_14_P104424	1	chr1_q42.12	222416967	222417020	PYCR2	pyrroline-5-carboxylate reductase family, member 2	0	0.00806452	0	0
A_14_P114781	1	chr1_q42.12	222433606	222433657	LEFTY2	left-right determination factor 2	0	0.00806452	0	0
A_16_P00266270	1	chr1_q42.12	222489779	222489838	C1orf55	chromosome 1 open reading frame 55	0	0.00806452	0	0
A_14_P138929	1	chr1_q42.12	222558577	222558636	H3F3A	H3 histone, family 3A	0	0.00806452	0	0
A_16_P15470846	1	chr1_q42.12	222679560	222679619	ACBD3	acyl-Coenzyme A binding domain containing 3	0	0.00806452	0	0
A_14_P118904	1	chr1_q42.12	222685975	222686034	BC033346	CDNA clone IMAGE:4828909	0	0.00806452	0	0
A_14_P103862	1	chr1_q42.12	222718789	222718848	MIXL1	Mix1 homeobox-like 1 (Xenopus laevis)	0	0.00806452	0	0
A_14_P126247	1	chr1_q42.12	222795606	222795665	LIN9	lin-9 homolog (C. elegans)	0	0.00806452	0	0
A_16_P00266702	1	chr1_q42.12	222855713	222855772	PARP1	poly (ADP-ribose) polymerase family, member 1	0	0.00806452	0	0
A_14_P201415	1	chr1_q42.13	225186793	225186852	RHOU	ras homolog gene family, member U	0.0204082	0	0	0
A_16_P15477048	1	chr1_q42.13	225389006	225389065	AL832503		0.0204082	0.00806452	0	0
A_16_P35497631	1	chr1_q42.13	225746758	225746817	RAB4A	RAB4A, member RAS oncogene family	0.0204082	0.00806452	0	0
A_14_P119935	1	chr1_q42.13	225784048	225784107	C1orf96	chromosome 1 open reading frame 96	0.0204082	0.00806452	0	0
A_14_P121813	1	chr1_q42.13	225873837	225873894	ACTA1		0.0204082	0.00806452	0	0
A_16_P15478145	1	chr1_q42.13	225878122	225878181	LOC731139	hypothetical protein LOC731139	0.0204082	0.00806452	0	0
A_16_P00270633	1	chr1_q42.13	225948546	225948605	NUP133	nucleoporin 133kDa	0.0408163	0.00806452	0	0
A_14_P106164	1	chr1_q42.13	225996840	225996899	ABCB10	ATP-binding cassette, sub-family B (MDR/TAP), member 10	0.0408163	0.00806452	0	0
A_14_P103952	1	chr1_q42.13	226067235	226067294	TAF5L	TAF5-like RNA polymerase II, p300/CBP-associated factor (PCAF)-associated factor, 65kDa	0.0408163	0.00806452	0	0
A_14_P202348	1	chr1_q42.13	226102025	226102084	KIAA0133	KIAA0133	0.0408163	0.00806452	0	0
A_16_P15479757	1	chr1_q42.13	226563444	226563503	GALNT2	UDP-N-acetyl-alpha-D-galactosamine:polypeptide N-acetylgalactosaminyltransferase 2 (GalNAc-T2)	0.0408163	0.00806452	0	0
A_14_P101473	1	chr1_q42.13	226756960	226757019	U79289	Clone 23695 mRNA sequence	0.0204082	0.00806452	0	0
A_16_P00271858	1	chr1_q42.13	226811427	226811486	PGBD5	piggyBac transposable element derived 5	0.0204082	0.00806452	0	0
A_16_P15481141	1	chr1_q42.2	227136240	227136297	COG2	component of oligomeric golgi complex 2	0.0204082	0.00806452	0	0
A_16_P00272282	1	chr1_q42.2	227149782	227149841	AGT		0.0204082	0.00806452	0	0
A_14_P115093	1	chr1_q42.2	227244241	227244292	CAPN9	calpain 9	0.0204082	0.00806452	0	0
A_16_P35501481	1	chr1_q42.2	227305927	227305986	C1orf198	chromosome 1 open reading frame 198	0.0204082	0.00806452	0	0
A_16_P15481619	1	chr1_q42.2	227320276	227320335	BC032911	CDNA clone IMAGE:5265308	0.0204082	0.00806452	0	0
A_16_P00272696	1	chr1_q42.2	227396801	227396860	TTC13	tetratricopeptide repeat domain 13	0.0204082	0.00806452	0	0
A_14_P120257	1	chr1_q42.2	227442893	227442952	ARV1	ARV1 homolog (S. cerevisiae)	0.0204082	0.00806452	0	0
A_14_P137784	1	chr1_q42.2	227477546	227477605	FAM89A	family with sequence similarity 89, member A	0.0204082	0.00806452	0	0
A_16_P15482329	1	chr1_q42.2	227615419	227615478	TRIM67		0.0204082	0.00806452	0	0
A_14_P137604	1	chr1_q42.2	227627127	227627186	FLJ30430	hypothetical protein FLJ30430	0.0204082	0.00806452	0	0
A_14_P103290	1	chr1_q42.2	227682985	227683044	C1orf131	chromosome 1 open reading frame 131	0.0204082	0.00806452	0	0
A_16_P00273156	1	chr1_q42.2	227720035	227720094	GNPAT	glyceronephosphate O-acyltransferase	0.0204082	0.00806452	0	0
A_14_P111529	1	chr1_q42.2	227776373	227776432	EXOC8	exocyst complex component 8	0.0204082	0.00806452	0	0
A_16_P15482789	1	chr1_q42.2	227795569	227795628	C1orf124	chromosome 1 open reading frame 124	0.0204082	0.00806452	0	0
A_14_P113236	1	chr1_q42.2	227866642	227866701	EGLN1	egl nine homolog 1 (C. elegans)	0.0204082	0.00806452	0	0
A_16_P15483137	1	chr1_q42.2	227968560	227968619	LOC440731	Hypothetical LOC440731	0.0204082	0.00806452	0	0
A_16_P35503224	1	chr1_q42.2	227999211	227999270	TSNAX	translin-associated factor X	0.0204082	0.00806452	0	0
A_16_P15484415	1	chr1_q42.2	228481844	228481903	DISC1	disrupted in schizophrenia 1	0.0204082	0.00806452	0	0
A_16_P00274994	1	chr1_q42.2	228956782	228956841	SIPA1L2	signal-induced proliferation-associated 1 like 2	0.0204082	0.00806452	0	0
A_16_P15486297	1	chr1_q42.2	229177950	229178009	AK093200		0.0204082	0.00806452	0	0
A_14_P122894	1	chr1_q42.2	229251385	229251444	KIAA1383	KIAA1383	0.0204082	0.00806452	0	0
A_16_P00275743	1	chr1_q42.2	229417067	229417126	C1orf57	chromosome 1 open reading frame 57	0.0204082	0.00806452	0	0
A_14_P132905	1	chr1_q42.2	229424054	229424113	AK094245	CDNA FLJ36926 fis, clone BRACE2005196	0.0204082	0.00806452	0	0
A_14_P108586	1	chr1_q42.2	229700662	229700721	PCNXL2	pecanex-like 2 (Drosophila)	0.0204082	0.00806452	0	0
A_16_P35507828	1	chr1_q42.2	229737029	229737088	AK092353		0.0204082	0.00806452	0	0
A_16_P15487969	1	chr1_q42.2	229825151	229825210	KIAA1804		0.0204082	0.00806452	0	0
A_16_P15488534	1	chr1_q42.2	230102988	230103047	KCNK1	potassium channel, subfamily K, member 1	0.0204082	0.00806452	0	0
A_14_P115075	1	chr1_q42.2	230114723	230114782	BC018051		0.0204082	0.00806452	0	0
A_14_P109167	1	chr1_q42.2	230766961	230767020	SLC35F3		0.0204082	0.00806452	0	0
A_16_P00277670	1	chr1_q42.2	230822763	230822822	C1orf31	chromosome 1 open reading frame 31	0.0204082	0.00806452	0	0
A_16_P35510322	1	chr1_q42.2	230826703	230826762	CR602593		0.0204082	0.00806452	0	0
A_16_P35510558	1	chr1_q42.2	230915158	230915217	TARBP1		0.0204082	0.00806452	0	0
A_14_P127165	1	chr1_q42.2	230972236	230972295	BC040195		0.0204082	0.00806452	0	0
A_14_P129127	1	chr1_q42.3	231049586	231049642	IRF2BP2	interferon regulatory factor 2 binding protein 2	0.0204082	0.00806452	0	0
A_16_P35511059	1	chr1_q42.3	231092522	231092581	BC032040	CDNA clone IMAGE:4825891	0.0204082	0.00806452	0	0
A_16_P00278117	1	chr1_q42.3	231103526	231103585	AK058184		0.0204082	0.00806452	0	0
A_16_P35511147	1	chr1_q42.3	231127236	231127295	AK127758		0.0204082	0.00806452	0	0
A_16_P35511354	1	chr1_q42.3	231200213	231200272	AF193050	PP2672	0.0204082	0.00806452	0	0
A_16_P15492102	1	chr1_q42.3	231606150	231606209	TOMM20	translocase of outer mitochondrial membrane 20 homolog (yeast)	0.0204082	0.016129	0	0
A_16_P15492280	1	chr1_q42.3	231683384	231683443	RBM34	RNA binding motif protein 34	0.0204082	0.00806452	0	0
A_16_P15492629	1	chr1_q42.3	231815596	231815655	ARID4B	AT rich interactive domain 4B (RBP1-like)	0.0204082	0.00806452	0	0
A_16_P15492678	1	chr1_q42.3	231831713	231831772	GGPS1	geranylgeranyl diphosphate synthase 1	0.0204082	0.00806452	0	0
A_16_P35512958	1	chr1_q42.3	231846458	231846517	BC041948	CDNA clone IMAGE:5301451	0.0204082	0.00806452	0	0
A_14_P112430	1	chr1_q42.3	231938227	231938286	TBCE	tubulin folding cofactor E	0.0204082	0.00806452	0	0.00806452
A_14_P115107	1	chr1_q42.3	231985197	231985256	B3GALNT2	beta-1,3-N-acetylgalactosaminyltransferase 2	0.0204082	0.00806452	0	0.00806452
A_16_P15493358	1	chr1_q42.3	232136603	232136662	GNG4	guanine nucleotide binding protein (G protein), gamma 4	0.0204082	0.00806452	0	0
A_16_P15493939	1	chr1_q42.3	232363045	232363104	LYST	lysosomal trafficking regulator	0.0204082	0.00806452	0	0
A_16_P00280030	1	chr1_q42.3	232550121	232550180	NID1	nidogen 1	0.0204082	0.00806452	0	0
A_14_P124080	1	chr1_q42.3	232698211	232698270	GPR137B	G protein-coupled receptor 137B	0.0204082	0.00806452	0	0
A_14_P119239	1	chr1_q42.3	232768304	232768363	ERO1LB	ERO1-like beta (S. cerevisiae)	0.0204082	0.00806452	0	0
A_16_P15495288	1	chr1_q42.3	232965604	232965663	EDARADD	EDAR-associated death domain	0.0204082	0.00806452	0	0
A_14_P126950	1	chr1_q43	233040135	233040194	LGALS8	CDNA clone IMAGE:4903661	0.0204082	0.00806452	0	0
A_16_P00280760	1	chr1_q43	233087220	233087279	HEATR1	HEAT repeat containing 1	0.0204082	0.00806452	0	0
A_16_P15496071	1	chr1_q43	233252596	233252655	ACTN2	actinin, alpha 2	0.0204082	0.00806452	0	0
A_14_P132244	1	chr1_q43	233386990	233387049	MTR	5-methyltetrahydrofolate-homocysteine methyltransferase	0.0204082	0.00806452	0	0
A_16_P00281357	1	chr1_q43	233487264	233487323	MT1P2	metallothionein 1 pseudogene 2	0.0204082	0.00806452	0	0
A_14_P129287	1	chr1_q43	234322138	234322197	RYR2	ryanodine receptor 2 (cardiac)	0.0204082	0.00806452	0	0
A_16_P00282791	1	chr1_q43	234354532	234354591	AL122093	MRNA; cDNA DKFZp434B2115 (from clone DKFZp434B2115)	0.0204082	0.00806452	0	0
A_16_P15499041	1	chr1_q43	234376206	234376265	ZP4	MRNA; cDNA DKFZp434B2115 (from clone DKFZp434B2115)	0.0204082	0	0	0
A_16_P15500388	1	chr1_q43	234958478	234958537	LOC339535	hypothetical protein LOC339535	0.0204082	0	0	0
A_16_P15500549	1	chr1_q43	235024713	235024772	AK091229		0.0204082	0	0	0
A_16_P15502132	1	chr1_q43	235738402	235738461	AL162037	MRNA; cDNA DKFZp434I039 (from clone DKFZp434I039)	0.0204082	0	0	0
A_14_P125847	1	chr1_q43	236397499	236397558	CHRM3	cholinergic receptor, muscarinic 3	0.0204082	0	0	0
A_14_P201069	1	chr1_q43	236402753	236402812	AK095715	CDNA FLJ38396 fis, clone FEBRA2007957	0.0204082	0	0	0
A_14_P200826	1	chr1_q43	236964184	236964243	FMN2	Formin 2	0.0204082	0	0	0
A_14_P139701	1	chr1_q43	237099373	237099432	GREM2	gremlin 2, cysteine knot superfamily, homolog (Xenopus laevis)	0.0204082	0	0	0
A_16_P15506764	1	chr1_q43	237472418	237472477	RGS7	regulator of G-protein signaling 7	0.0408163	0	0	0
A_14_P127149	1	chr1_q43	238006592	238006651	FH	fumarate hydratase	0.0204082	0	0	0
A_14_P110695	1	chr1_q43	238083225	238083284	KMO	kynurenine 3-monooxygenase (kynurenine 3-hydroxylase)	0.0408163	0	0	0
A_14_P100448	1	chr1_q43	238125127	238125186	OPN3	opsin 3 (encephalopsin, panopsin)	0.0408163	0	0	0
A_16_P15508496	1	chr1_q43	238163327	238163386	AK122927		0.0204082	0	0	0
A_16_P15508806	1	chr1_q43	238285549	238285608	WDR64		0.0204082	0	0	0
A_16_P35529688	1	chr1_q43	238379001	238379060	EXO1	exonuclease 1	0.0204082	0	0	0
A_16_P15509285	1	chr1_q43	238488166	238488225	MAP1LC3C	microtubule-associated protein 1 light chain 3 gamma	0.0204082	0	0	0
A_16_P00289498	1	chr1_q43	239007513	239007572	PLD5	phospholipase D family, member 5	0.0204082	0.00806452	0	0
A_16_P00289979	1	chr1_q44	239544570	239544614	LOC284701	hypothetical protein LOC284701	0.0204082	0.00806452	0	0
A_16_P15512080	1	chr1_q44	239708851	239708910	CEP170	centrosomal protein 170kDa	0.0204082	0.016129	0	0
A_16_P00290081	1	chr1_q44	239731436	239731495	BC050722		0.0204082	0.016129	0	0
A_14_P108488	1	chr1_q44	239989104	239989154	SDCCAG8	serologically defined colon cancer antigen 8	0.0204082	0.016129	0	0
A_14_P108181	1	chr1_q44	240332470	240332520	AKT3	v-akt murine thymoma viral oncogene homolog 3 (protein kinase B, gamma)	0.0204082	0.016129	0	0
A_16_P35534928	1	chr1_q44	240532956	240533015	BC046644		0.0204082	0.016129	0	0
A_14_P127771	1	chr1_q44	240546328	240546387	ZNF238	zinc finger protein 238	0.0204082	0.016129	0	0
A_16_P15514267	1	chr1_q44	240555154	240555213	LOC440742		0.0204082	0.016129	0	0
A_16_P35535882	1	chr1_q44	240878139	240878198	C1orf100	chromosome 1 open reading frame 100	0.0204082	0.00806452	0	0
A_14_P107574	1	chr1_q44	240935701	240935760	ADSS	adenylosuccinate synthase	0.0204082	0.00806452	0	0
A_14_P128538	1	chr1_q44	241129384	241129443	C1orf101	chromosome 1 open reading frame 101	0.0204082	0.00806452	0	0
A_14_P114520	1	chr1_q44	241195262	241195321	C1orf121	---	0.0204082	0.00806452	0	0
A_16_P35536709	1	chr1_q44	241331609	241331668	FAM36A	family with sequence similarity 36, member A	0.0204082	0.00806452	0	0
A_16_P00292317	1	chr1_q44	241335900	241335959	AK095297	Transcribed locus	0.0204082	0.00806452	0	0
A_14_P127963	1	chr1_q44	241349660	241349719	HNRNPU	heterogeneous nuclear ribonucleoprotein U (scaffold attachment factor A)	0.0204082	0.00806452	0	0
A_16_P00292678	1	chr1_q44	241616114	241616173	AK027158	---	0.0204082	0.016129	0	0
A_16_P15517112	1	chr1_q44	241832902	241832961	AK125187		0.0204082	0.016129	0	0
A_14_P113203	1	chr1_q44	241854082	241854141	KIF26B	kinesin family member 26B	0.0204082	0.016129	0	0
A_14_P109963	1	chr1_q44	242196701	242196760	AK095500	CDNA FLJ38181 fis, clone FCBBF1000125	0.0204082	0.016129	0	0
A_16_P15519625	1	chr1_q44	242790473	242790532	SMYD3	SET and MYND domain containing 3	0.0408163	0.016129	0	0
A_16_P15520103	1	chr1_q44	242991896	242991955	AB057595		0.0408163	0.00806452	0	0
A_16_P00294870	1	chr1_q44	243004283	243004342	LOC255654	hypothetical protein LOC255654	0.0408163	0.00806452	0	0
A_14_P114977	1	chr1_q44	243046700	243046758	TFB2M	transcription factor B2, mitochondrial	0.0408163	0.00806452	0	0
A_16_P35541435	1	chr1_q44	243151259	243151318	C1orf71	chromosome 1 open reading frame 71	0.0408163	0.00806452	0	0
A_14_P128563	1	chr1_q44	243157053	243157112	AL834246	---	0.0408163	0.00806452	0	0
A_14_P103238	1	chr1_q44	243257092	243257151	SCCPDH	saccharopine dehydrogenase (putative)	0.0408163	0.00806452	0	0
A_16_P00295221	1	chr1_q44	243280107	243280166	LOC149134	hypothetical LOC149134	0.0408163	0.00806452	0	0
A_16_P35542067	1	chr1_q44	243400442	243400501	AHCTF1	AT hook containing transcription factor 1	0.0408163	0.00806452	0	0
A_16_P35542125	1	chr1_q44	243420173	243420232	AY157619		0.0408163	0.00806452	0	0
A_14_P117067	1	chr1_q44	243495592	243495651	ZNF695		0.0408163	0.00806452	0	0
A_16_P15521317	1	chr1_q44	243519593	243519652	CR597038		0.0408163	0.00806452	0	0
A_16_P15521373	1	chr1_q44	243560984	243561043	ZNF670	zinc finger protein 670	0.0408163	0.00806452	0	0
A_16_P35542436	1	chr1_q44	243592299	243592358	ZNF669	zinc finger protein 669	0.0408163	0.00806452	0	0
A_16_P00295614	1	chr1_q44	243637678	243637737	BC032514		0.0408163	0.00806452	0	0
A_16_P15521541	1	chr1_q44	243656701	243656760	ZNF124	zinc finger protein 124	0.0408163	0.00806452	0	0
A_14_P127091	1	chr1_q44	243745726	243745785	VN1R5	vomeronasal 1 receptor 5	0.0408163	0.00806452	0	0
A_14_P110030	1	chr1_q44	243799752	243799806	ZNF496	zinc finger protein 496	0.0408163	0.00806452	0	0
A_16_P00295787	1	chr1_q44	243815666	243815725	LOC729810	hypothetical protein LOC729810	0.0408163	0.00806452	0	0
A_14_P127104	1	chr1_q44	243931046	243931105	NLRP3	NLR family, pyrin domain containing 3	0.0408163	0.00806452	0	0
A_16_P15522222	1	chr1_q44	244009968	244010027	LOC644852	hypothetical LOC644852	0.0408163	0.00806452	0	0
A_14_P118208	1	chr1_q44	244021734	244021792	OR2C3	olfactory receptor, family 2, subfamily C, member 3	0.0408163	0.00806452	0	0
A_16_P00296028	1	chr1_q44	244030126	244030185	AK124520		0.0408163	0.00806452	0	0
A_14_P112778	1	chr1_q44	244063856	244063915	C1orf150	chromosome 1 open reading frame 150	0.0408163	0.00806452	0	0
A_16_P35543387	1	chr1_q44	244077743	244077802	OR2G2		0.0408163	0.00806452	0	0
A_16_P35543717	1	chr1_q44	244236273	244236332	BC036260	CDNA clone IMAGE:5271034	0.0408163	0.00806452	0	0
A_16_P00296272	1	chr1_q44	244246745	244246804	OR1C1	olfactory receptor, family 1, subfamily C, member 1	0.0408163	0.00806452	0	0
A_16_P15522750	1	chr1_q44	244269339	244269398	AY358215		0.0408163	0.00806452	0	0
A_14_P105489	1	chr1_q44	244366498	244366557	TRIM58	tripartite motif-containing 58	0.0408163	0.00806452	0	0
A_14_P121873	1	chr1_q44	244386401	244386460	BX537432		0.0408163	0.00806452	0	0
A_14_P116408	1	chr1_q44	244588695	244588754	OR2L13	olfactory receptor, family 2, subfamily L, member 13	0.0408163	0.00806452	0	0
A_16_P00296802	1	chr1_q44	244728879	244728938	OR2M4	olfactory receptor, family 2, subfamily M, member 4	0.0408163	0.00806452	0	0
A_16_P00296894	1	chr1_q44	244838154	244838213	OR5BF1		0.0408163	0.00806452	0	0
A_16_P15523964	1	chr1_q44	244895428	244895487	OR2T1		0.0408163	0.00806452	0	0
A_16_P35545117	1	chr1_q44	244942436	244942481	OR2T2		0.0408163	0.00806452	0	0
A_16_P15524319	1	chr1_q44	245082256	245082315	OR2T10		0.0408163	0.0241935	0.0612245	0.016129
A_16_P35545672	1	chr1_q44	245210791	245210850	LOC646627	phospholipase inhibitor	0.0408163	0	0	0
A_14_P134962	1	chr1_q44	245328092	245328151	SH3BP5L	SH3-binding domain protein 5-like	0.0408163	0	0	0
A_14_P103141	1	chr1_q44	245348547	245348602	ZNF672	zinc finger protein 672	0.0408163	0	0	0
A_14_P120601	1	chr1_q44	245361556	245361610	ZNF692	zinc finger protein 692	0.0408163	0	0	0
A_14_P105372	1	chr1_q44	245422360	245422419	PGBD2	piggyBac transposable element derived 2	0.0408163	0	0	0
A_16_P00297725	2	chr2_p25.3	253125	253184	SH3YL1	SH3 domain containing, Ysc84-like 1 (S. cerevisiae)	0.0204082	0	0	0
A_14_P201191	2	chr2_p25.3	264458	264517	ACP1	acid phosphatase 1, soluble	0.0204082	0	0	0
A_16_P35546783	2	chr2_p25.3	276329	276388	FAM150B	family with sequence similarity 150, member B	0.0204082	0	0	0
A_14_P133506	2	chr2_p25.3	479448	479507	LOC727944	hypothetical protein LOC727944	0.0204082	0	0	0
A_14_P106482	2	chr2_p25.3	665905	665964	TMEM18	transmembrane protein 18	0.0204082	0	0	0
A_16_P15527194	2	chr2_p25.3	851526	851585	LOC339822	hypothetical protein LOC339822	0.0204082	0	0	0
A_16_P15527426	2	chr2_p25.3	928715	928774	LOC728176	hypothetical protein LOC728176	0.0204082	0	0	0
A_16_P15528482	2	chr2_p25.3	1350340	1350399	SNTG2	syntrophin, gamma 2	0.0204082	0	0	0
A_14_P129628	2	chr2_p25.3	1525454	1525513	TPO	thyroid peroxidase	0.0204082	0	0	0.00806452
A_16_P00299896	2	chr2_p25.3	1711503	1711562	PXDN	peroxidasin homolog (Drosophila)	0.0204082	0	0	0
A_16_P15530332	2	chr2_p25.3	1992134	1992193	MYT1L	myelin transcription factor 1-like	0.0204082	0	0	0
A_14_P111971	2	chr2_p25.3	3499283	3499342	BC043283	CDNA clone IMAGE:30378154	0.0204082	0	0	0
A_16_P15535662	2	chr2_p25.2	4195239	4195298	BC047589		0.0204082	0	0	0
A_14_P105490	2	chr2_p25.2	5791383	5791442	SOX11	SRY (sex determining region Y)-box 11	0.0204082	0	0	0
A_16_P00306305	2	chr2_p25.2	6069648	6069707	FLJ30594	hypothetical locus FLJ30594	0.0204082	0	0	0
A_16_P15540270	2	chr2_p25.2	6074299	6074358	FLJ41046		0.0204082	0	0	0
A_16_P35562574	2	chr2_p25.2	6457775	6457834	BC044918		0.0204082	0	0	0
A_16_P00307549	2	chr2_p25.2	6858676	6858735	FLJ42418		0.0204082	0	0	0
A_16_P15542539	2	chr2_p25.2	6952303	6952362	LOC129607	hypothetical protein LOC129607	0.0204082	0	0	0
A_16_P15542623	2	chr2_p25.2	6987181	6987240	RSAD2	radical S-adenosyl methionine domain containing 2	0.0204082	0	0	0
A_16_P15542663	2	chr2_p25.2	7006694	7006753	LOC386597	hypothetical protein LOC386597	0.0204082	0	0	0
A_14_P201091	2	chr2_p25.1	7130997	7131056	RNF144A	ring finger protein 144A	0.0204082	0	0	0
A_16_P00308658	2	chr2_p25.1	7535662	7535721	AK093290	CDNA FLJ35971 fis, clone TESTI2013257	0.0204082	0	0	0
A_16_P15545592	2	chr2_p25.1	8063943	8064002	LOC339788	hypothetical protein LOC339788	0.0204082	0	0	0
A_16_P35567934	2	chr2_p25.1	8414886	8414945	C2orf46	chromosome 2 open reading frame 46	0.0204082	0	0	0
A_16_P35568688	2	chr2_p25.1	8670244	8670303	BX641130		0.0204082	0	0	0
A_14_P127399	2	chr2_p25.1	8773385	8773444	ID2	inhibitor of DNA binding 2, dominant negative helix-loop-helix protein	0.0204082	0	0	0
A_16_P15547674	2	chr2_p25.1	8801818	8801877	LOC285147	hypothetical protein LOC285147	0.0204082	0	0	0
A_16_P00311008	2	chr2_p25.1	8926516	8926575	KIDINS220	kinase D-interacting substrate of 220 kDa	0.0204082	0	0	0
A_14_P139375	2	chr2_p25.1	8951063	8951122	MBOAT2	membrane bound O-acyltransferase domain containing 2	0.0204082	0	0	0
A_16_P00311243	2	chr2_p25.1	9087901	9087960	OACT2		0.0204082	0	0	0
A_16_P00313403	2	chr2_p25.1	10512947	10513005	HPCAL1	hippocalcin-like 1	0	0	0	0.00806452
A_16_P00315178	2	chr2_p25.1	11707567	11707626	GREB1	GREB1 protein	0	0	0	0.00806452
A_16_P00319415	2	chr2_p24.3	14717648	14717707	AY928977		0.0204082	0	0	0
A_14_P138623	2	chr2_p24.3	14723677	14723725	FAM84A	family with sequence similarity 84, member A	0.0204082	0	0	0
A_16_P15562346	2	chr2_p24.3	14733313	14733372	AK092711		0.0204082	0	0	0
A_14_P112420	2	chr2_p24.3	14740020	14740077	LOC653602	hypothetical LOC653602	0.0204082	0	0	0
A_16_P15563733	2	chr2_p24.3	15321269	15321328	NAG	neuroblastoma-amplified protein	0.0204082	0	0	0
A_14_P130454	2	chr2_p24.1	20346474	20346520	SDC1	syndecan 1	0	0	0.0204082	0.00806452
A_14_P133101	2	chr2_p24.1	20380386	20380443	PUM2	pumilio homolog 2 (Drosophila)	0	0	0	0.00806452
A_16_P00334982	2	chr2_p23.3	25276230	25276289	EFR3B	EFR3 homolog B (S. cerevisiae)	0	0	0	0.00806452
A_16_P35610582	2	chr2_p23.3	25285010	25285069	AK095190		0	0	0	0.00806452
A_14_P115096	2	chr2_p23.3	25301280	25301339	POMC	proopiomelanocortin (adrenocorticotropin/ beta-lipotropin/ alpha-melanocyte stimulating hormone/ beta-melanocyte stimulating hormone/ beta-endorphin)	0	0	0	0.00806452
A_16_P00335261	2	chr2_p23.3	25457407	25457463	DNMT3A	DNA (cytosine-5-)-methyltransferase 3 alpha	0	0	0	0.00806452
A_14_P120104	2	chr2_p21	45082071	45082118	SIX3	SIX homeobox 3	0	0	0	0.00806452
A_16_P15637749	2	chr2_p21	45744038	45744097	SRBD1	S1 RNA binding domain 1	0	0.00806452	0	0
A_14_P202202	2	chr2_p21	46325161	46325220	PRKCE	protein kinase C, epsilon	0	0.00806452	0	0
A_16_P15639991	2	chr2_p21	46525346	46525405	EPAS1	Endothelial PAS domain protein 1	0	0.00806452	0	0
A_16_P00365909	2	chr2_p21	46545401	46545459	LOC388946	Hypothetical LOC388946	0	0.00806452	0	0
A_16_P15640313	2	chr2_p21	46677923	46677982	ATP6V1E2	ATPase, H+ transporting, lysosomal 31kDa, V1 subunit E2	0	0.00806452	0	0
A_14_P125107	2	chr2_p21	46712479	46712538	RHOQ	ras homolog gene family, member Q	0	0.00806452	0	0
A_16_P35664648	2	chr2_p21	46751709	46751768	PIGF	phosphatidylinositol glycan anchor biosynthesis, class F	0	0.00806452	0	0
A_14_P121220	2	chr2_p21	46763780	46763839	CRIPT	cysteine-rich PDZ-binding protein	0	0.00806452	0	0
A_14_P105713	2	chr2_p21	46901461	46901520	SOCS5	suppressor of cytokine signaling 5	0	0.00806452	0	0
A_16_P15640992	2	chr2_p21	46945008	46945067	LOC388948	hypothetical gene supported by BC062774	0	0.00806452	0	0
A_16_P15641055	2	chr2_p21	46974013	46974072	BC017573		0	0.00806452	0	0
A_16_P15641119	2	chr2_p21	46996832	46996891	LOC150837	hypothetical protein LOC150837	0	0.00806452	0	0
A_16_P15641271	2	chr2_p21	47053517	47053576	MCFD2	multiple coagulation factor deficiency 2	0	0.00806452	0	0
A_16_P15641317	2	chr2_p21	47075585	47075644	AK056464		0	0.00806452	0	0
A_16_P00366951	2	chr2_p21	47213377	47213433	TTC7A		0	0.00806452	0	0.00806452
A_16_P15641851	2	chr2_p21	47268713	47268772	C2orf61	chromosome 2 open reading frame 61	0	0.00806452	0	0.00806452
A_14_P114921	2	chr2_p21	47312518	47312577	CALM2	calmodulin 2 (phosphorylase kinase, delta)	0	0.00806452	0	0
A_16_P15642355	2	chr2_p21	47472379	47472438	AK094343	CDNA FLJ37024 fis, clone BRACE2010837	0	0.00806452	0	0
A_16_P00367332	2	chr2_p21	47484315	47484374	CR593061		0	0.00806452	0	0
A_14_P113932	2	chr2_p21	47525390	47525449	TACSTD1	tumor-associated calcium signal transducer 1	0	0.00806452	0	0
A_16_P35666889	2	chr2_p21	47621538	47621597	MSH2	mutS homolog 2, colon cancer, nonpolyposis type 1 (E. coli)	0	0.00806452	0	0
A_16_P15642723	2	chr2_p21	47638315	47638374	AK222860		0	0.00806452	0	0
A_16_P00367601	2	chr2_p21	47700073	47700132	KCNK12	potassium channel, subfamily K, member 12	0	0.00806452	0	0
A_14_P102713	2	chr2_p16.3	47712503	47712562	LOC440863	hypothetical gene supported by AK026773	0	0.00806452	0	0
A_16_P00367735	2	chr2_p16.3	47814722	47814781	AK223284		0	0.00806452	0	0
A_16_P00367752	2	chr2_p16.3	47841081	47841140	LOC440864	hypothetical gene supported by BC040724	0	0.00806452	0	0
A_16_P35675913	2	chr2_p16.3	51163149	51163208	NRXN1	neurexin 1	0	0.00806452	0	0
A_16_P00373095	2	chr2_p16.3	51294464	51294523	AK127244		0	0.00806452	0	0.00806452
A_16_P35692289	2	chr2_p16.1	58170702	58170761	BC036434		0	0.00806452	0	0
A_14_P200060	2	chr2_p16.1	58298123	58298182	VRK2	vaccinia related kinase 2	0	0.00806452	0	0
A_16_P00382730	2	chr2_p16.1	58370823	58370882	FANCL	Fanconi anemia, complementation group L	0	0.00806452	0	0
A_16_P35695123	2	chr2_p16.1	59196271	59196330	FLJ30838	hypothetical gene supported by AL832565	0	0.00806452	0	0
A_14_P127324	2	chr2_p16.1	59409102	59409161	AK056269		0	0.00806452	0	0
A_14_P106886	2	chr2_p16.1	60684905	60684963	BCL11A	B-cell CLL/lymphoma 11A (zinc finger protein)	0	0.00806452	0	0
A_14_P108301	2	chr2_p16.1	60936794	60936853	PAPOLG	poly(A) polymerase gamma	0	0.00806452	0	0
A_16_P15675134	2	chr2_p16.1	61005290	61005349	AK122786		0	0.00806452	0	0
A_14_P115770	2	chr2_p16.1	61061211	61061270	REL	v-rel reticuloendotheliosis viral oncogene homolog (avian)	0	0.00806452	0	0
A_14_P101305	2	chr2_p16.1	61147723	61147782	CCDC139	coiled-coil domain containing 139	0	0.00806452	0	0
A_14_P202328	2	chr2_p16.1	61187317	61187376	PEX13	peroxisome biogenesis factor 13	0	0.00806452	0	0
A_16_P00387471	2	chr2_p15	61276267	61276326	KIAA1841		0	0.00806452	0	0
A_16_P00387495	2	chr2_p15	61302509	61302568	LOC339804	hypothetical gene supported by AK075484; BC014578	0	0.00806452	0	0
A_14_P201231	2	chr2_p15	61320089	61320146	AHSA2	AHA1, activator of heat shock 90kDa protein ATPase homolog 2 (yeast)	0	0.00806452	0	0
A_16_P35701374	2	chr2_p15	61604224	61604283	USP34	ubiquitin specific peptidase 34	0	0.00806452	0	0
A_16_P15676643	2	chr2_p15	61674524	61674583	XPO1	exportin 1 (CRM1 homolog, yeast)	0	0.00806452	0	0
A_14_P125102	2	chr2_p15	61941877	61941936	AK091575		0	0.00806452	0	0
A_16_P15677226	2	chr2_p15	61987121	61987180	FLJ13305	Hypothetical protein FLJ13305	0	0.00806452	0	0
A_14_P108299	2	chr2_p15	62027361	62027406	CCT4	chaperonin containing TCP1, subunit 4 (delta)	0	0.00806452	0	0
A_14_P117864	2	chr2_p15	62274603	62274662	COMMD1	copper metabolism (Murr1) domain containing 1	0	0.00806452	0	0
A_16_P00388630	2	chr2_p15	62280175	62280234	BC071802		0	0.00806452	0	0
A_16_P35702972	2	chr2_p15	62362686	62362745	B3GNT2	UDP-GlcNAc:betaGal beta-1,3-N-acetylglucosaminyltransferase 2	0	0.00806452	0	0
A_14_P202134	2	chr2_p15	62644258	62644317	TMEM17	transmembrane protein 17	0	0.00806452	0	0
A_16_P15678574	2	chr2_p15	62664797	62664856	AK124081		0	0.00806452	0	0
A_16_P00389236	2	chr2_p15	62797271	62797330	BC038779	CDNA clone IMAGE:5271366	0	0.00806452	0	0
A_16_P15679731	2	chr2_p15	63184966	63185025	EHBP1		0	0.00806452	0	0
A_14_P200061	2	chr2_p15	63193506	63193563	OTX1	orthodenticle homeobox 1	0	0.00806452	0	0
A_16_P35704886	2	chr2_p15	63258296	63258355	AF229803	Endozepine-like protein type 1 mutant	0	0.00806452	0	0
A_16_P15680524	2	chr2_p15	63703861	63703920	LOC51057	hypothetical protein LOC51057	0	0.00806452	0	0
A_16_P00390325	2	chr2_p15	63744766	63744825	MDH1	malate dehydrogenase 1, NAD (soluble)	0	0.00806452	0	0
A_14_P138847	2	chr2_p15	64014333	64014392	FLJ36848	hypothetical LOC647115	0	0.00806452	0	0
A_16_P00390697	2	chr2_p14	64022758	64022817	UGP2	UDP-glucose pyrophosphorylase 2	0	0.00806452	0	0
A_14_P103953	2	chr2_p14	64157311	64157367	VPS54	vacuolar protein sorting 54 homolog (S. cerevisiae)	0	0.00806452	0	0
A_16_P35706886	2	chr2_p14	64280952	64281011	PELI1	pellino homolog 1 (Drosophila)	0	0.00806452	0	0
A_16_P15681990	2	chr2_p14	64341470	64341529	DKFZp434G179	hypothetical protein DKFZp434G179	0	0.00806452	0	0
A_16_P15682106	2	chr2_p14	64385172	64385231	CR605149		0	0.00806452	0	0
A_16_P00391530	2	chr2_p14	64599701	64599760	HSPC159	galectin-related protein	0	0.00806452	0	0
A_16_P00391755	2	chr2_p14	64730603	64730662	AFTPH	aftiphilin	0	0.00806452	0	0
A_16_P15683080	2	chr2_p14	64752072	64752131	LOC339807	hypothetical protein LOC339807	0	0.00806452	0	0
A_14_P200961	2	chr2_p14	64788441	64788500	SERTAD2	SERTA domain containing 2	0	0.00806452	0	0
A_16_P00392192	2	chr2_p14	64996314	64996373	AK097952	CDNA FLJ40633 fis, clone THYMU2015439	0	0.00806452	0	0
A_16_P15683876	2	chr2_p14	65067941	65068000	LOC400958	hypothetical gene supported by BC037562	0	0.00806452	0	0
A_16_P15684100	2	chr2_p14	65161263	65161321	SLC1A4	solute carrier family 1 (glutamate/neutral amino acid transporter), member 4	0	0.00806452	0	0
A_16_P00392488	2	chr2_p14	65216651	65216710	CEP68	centrosomal protein 68kDa	0	0.00806452	0	0
A_14_P113309	2	chr2_p14	65260462	65260521	RAB1A	RAB1A, member RAS oncogene family	0	0.00806452	0	0
A_16_P15684640	2	chr2_p14	65403769	65403828	ACTR2	ARP2 actin-related protein 2 homolog (yeast)	0	0.00806452	0	0
A_14_P114382	2	chr2_p14	65565234	65565293	SPRED2	sprouty-related, EVH1 domain containing 2	0	0.00806452	0	0
A_16_P35711965	2	chr2_p14	66217234	66217293	FLJ16124	FLJ16124 protein	0	0.00806452	0	0
A_16_P00394389	2	chr2_p14	66466894	66466953	AK091143		0	0.00806452	0	0
A_16_P35713363	2	chr2_p14	66710849	66710908	MEIS1	Meis homeobox 1	0	0.00806452	0	0
A_16_P15688425	2	chr2_p14	66832748	66832807	LOC730200	Hypothetical protein LOC730200	0	0.00806452	0	0
A_16_P15690058	2	chr2_p14	67415012	67415071	BC040863		0	0.00806452	0	0
A_14_P102000	2	chr2_p14	67548695	67548754	ETAA16	---	0	0.00806452	0	0
A_16_P15691422	2	chr2_p14	67947410	67947469	BC028245	Homo sapiens, Similar to hypothetical gene LOC130797, clone IMAGE:5395354, mRNA	0	0.00806452	0	0
A_14_P121427	2	chr2_p14	68197412	68197471	C1D	nuclear DNA-binding protein	0	0.00806452	0	0
A_16_P15692283	2	chr2_p14	68288987	68289046	WDR92	WD repeat domain 92	0	0.00806452	0	0
A_16_P15692331	2	chr2_p14	68312237	68312296	PNO1	partner of NOB1 homolog (S. cerevisiae)	0	0.00806452	0	0
A_16_P15692512	2	chr2_p14	68388522	68388581	PPP3R1	protein phosphatase 3 (formerly 2B), regulatory subunit B, alpha isoform	0	0.00806452	0	0
A_14_P107899	2	chr2_p14	68399969	68400028	AY183476		0	0.00806452	0	0
A_16_P15692700	2	chr2_p14	68456077	68456135	CNRIP1	cannabinoid receptor interacting protein 1	0	0.00806452	0	0
A_16_P00397754	2	chr2_p13.3	68527191	68527250	PLEK	pleckstrin	0	0.00806452	0	0
A_16_P15705386	2	chr2_p13.1	73955709	73955768	AK125975		0	0	0	0.00806452
A_16_P35768740	2	chr2_p11.2	89808291	89808350	Z68978		0	0	0	0.00806452
A_16_P00424380	2	chr2_p11.2	89814078	89814137	IGKV1D-13	immunoglobulin kappa variable 1D-13	0	0	0	0.00806452
A_16_P35769010	2	chr2_p11.2	89937411	89937470	AY942022		0	0	0	0.00806452
A_16_P00424417	2	chr2_p11.2	89953713	89953772	AY942117		0	0	0	0.00806452
A_16_P00426512	2	chr2_q11.2	96917323	96917382	CNNM3	cyclin M3	0	0.00806452	0	0
A_14_P102228	2	chr2_q11.2	96930804	96930863	ANKRD23	ankyrin repeat domain 23	0	0.00806452	0	0
A_16_P00426554	2	chr2_q11.2	96944927	96944979	ANKRD39	ankyrin repeat domain 39	0	0.00806452	0	0
A_16_P00426573	2	chr2_q11.2	96955852	96955903	SEMA4C	sema domain, immunoglobulin domain (Ig), transmembrane domain (TM) and short cytoplasmic domain, (semaphorin) 4C	0	0.00806452	0	0
A_16_P15749377	2	chr2_q11.2	97034701	97034760	AK122705		0	0.00806452	0	0
A_14_P125453	2	chr2_q11.2	97050130	97050189	BC039488		0	0.00806452	0	0
A_16_P00426798	2	chr2_q11.2	97169654	97169705	BC104424		0	0.00806452	0	0
A_16_P00426799	2	chr2_q11.2	97179852	97179911	DKFZp434N062	CDNA clone IMAGE:5312078	0	0.00806452	0	0
A_14_P107717	2	chr2_q14.2	121449161	121449220	GLI2	GLI-Kruppel family member GLI2	0	0	0	0.016129
A_16_P35858264	2	chr2_q21.1	132100455	132100499	BC093080		0	0	0.0204082	0.00806452
A_16_P15828690	2	chr2_q21.1	132111372	132111416	CCDC74B	coiled-coil domain containing 74B	0	0	0.0204082	0.00806452
A_16_P35858341	2	chr2_q21.1	132124672	132124716	CCDC74A		0	0	0.0204082	0.00806452
A_16_P35925087	2	chr2_q24.1	158917635	158917694	LOC554201	hypothetical LOC554201	0	0	0.0204082	0
A_16_P00508378	2	chr2_q24.1	159003585	159003644	LOC130940		0	0	0.0204082	0
A_16_P15894838	2	chr2_q24.1	159136742	159136801	CCDC148	coiled-coil domain containing 148	0	0	0.0204082	0
A_14_P123816	2	chr2_q24.1	159362317	159362376	PKP4	plakophilin 4	0	0	0.0204082	0
A_16_P15974742	2	chr2_q32.2	191655055	191655114	GLS	glutaminase	0	0	0.0204082	0
A_16_P00556823	2	chr2_q32.2	191703887	191703943	STAT1	signal transducer and activator of transcription 1, 91kDa	0	0	0.0204082	0
A_16_P36008229	2	chr2_q32.2	191838268	191838327	STAT4	signal transducer and activator of transcription 4	0	0	0.0204082	0
A_16_P15976026	2	chr2_q32.3	192114652	192114711	MYO1B		0	0	0.0204082	0
A_14_P201747	2	chr2_q32.3	192376477	192376536	OBFC2A	oligonucleotide/oligosaccharide-binding fold containing 2A	0	0	0.0204082	0
A_16_P36009752	2	chr2_q32.3	192384425	192384484	AK130181		0	0	0.0204082	0
A_14_P133901	2	chr2_q32.3	192533796	192533855	SDPR	serum deprivation response (phosphatidylserine binding protein)	0	0	0.0204082	0
A_14_P114994	2	chr2_q32.3	192882174	192882229	TMEFF2	transmembrane protein with EGF-like and two follistatin-like domains 2	0	0	0.0204082	0
A_16_P00559708	2	chr2_q32.3	193465223	193465282	PCGEM1	prostate-specific non-coding gene	0	0	0.0204082	0
A_16_P36060593	2	chr2_q34	212654753	212654812	ERBB4	v-erb-a erythroblastic leukemia viral oncogene homolog 4 (avian)	0	0.00806452	0	0
A_16_P00596826	2	chr2_q35	218560277	218560336	TNS1	tensin 1	0	0	0	0.00806452
A_14_P104637	2	chr2_q35	219096100	219096151	CTDSP1	CTD (carboxy-terminal domain, RNA polymerase II, polypeptide A) small phosphatase 1	0	0	0	0.00806452
A_16_P16042502	2	chr2_q35	219106259	219106318	AK125889		0	0	0	0.00806452
A_16_P16042545	2	chr2_q35	219123287	219123342	VIL1	villin 1	0	0	0	0.00806452
A_14_P133988	2	chr2_q35	219868001	219868059	C2orf24	chromosome 2 open reading frame 24	0	0	0	0.00806452
A_14_P104407	2	chr2_q35	219873244	219873303	FAM134A	family with sequence similarity 134, member A	0	0	0	0.00806452
A_14_P107883	2	chr2_q35	219899141	219899200	ZFAND2B	zinc finger, AN1-type domain 2B	0	0	0	0.00806452
A_14_P115442	2	chr2_q35	219908015	219908074	ABCB6	ATP-binding cassette, sub-family B (MDR/TAP), member 6	0	0	0	0.00806452
A_14_P121610	2	chr2_q35	219912657	219912704	ATG9A	ATG9 autophagy related 9 homolog A (S. cerevisiae)	0	0	0	0.00806452
A_16_P16044495	2	chr2_q35	219925852	219925911	ANKZF1	ankyrin repeat and zinc finger domain containing 1	0	0	0	0.00806452
A_14_P109896	2	chr2_q35	219930593	219930649	GLB1L	galactosidase, beta 1-like	0	0	0	0.00806452
A_14_P110394	2	chr2_q35	219938400	219938451	STK16	serine/threonine kinase 16	0	0	0	0.00806452
A_14_P102962	2	chr2_q35	219941687	219941746	TUBA4A	tubulin, alpha 4a	0	0	0	0.00806452
A_14_P131790	2	chr2_q35	219959534	219959592	TUBA4B	tubulin, alpha 4b (pseudogene)	0	0	0	0.00806452
A_14_P134293	2	chr2_q35	219974733	219974785	DNAJB2	DnaJ (Hsp40) homolog, subfamily B, member 2	0	0	0	0.00806452
A_16_P00598877	2	chr2_q35	219999193	219999237	PTPRN	protein tyrosine phosphatase, receptor type, N	0	0	0	0.00806452
A_16_P00598887	2	chr2_q35	220017624	220017683	RESP18		0	0	0	0.00806452
A_16_P36080004	2	chr2_q35	220059401	220059458	CR620362	Full length insert cDNA clone ZA89G05	0	0	0	0.00806452
A_14_P127105	2	chr2_q35	220075403	220075454	DNPEP	aspartyl aminopeptidase	0	0	0	0.00806452
A_16_P16044846	2	chr2_q35	220089277	220089336	CR611155		0	0	0	0.00806452
A_14_P114018	2	chr2_q35	220113983	220114031	DES	desmin	0	0	0	0.00806452
A_16_P16044966	2	chr2_q35	220133722	220133776	AK126500		0	0	0	0.00806452
A_16_P00599117	2	chr2_q35	220178030	220178089	SPEG	SPEG complex locus	0	0	0	0.00806452
A_16_P36080452	2	chr2_q35	220194307	220194361	GMPPA	GDP-mannose pyrophosphorylase A	0	0	0	0.00806452
A_14_P107114	2	chr2_q35	220228967	220229023	ACCN4	amiloride-sensitive cation channel 4, pituitary	0	0	0	0.00806452
A_16_P16045319	2	chr2_q35	220240534	220240583	TMEM198	transmembrane protein 198	0	0	0	0.00806452
A_16_P16045379	2	chr2_q35	220259551	220259610	OBSL1	obscurin-like 1	0	0	0	0.00806452
A_14_P119467	2	chr2_q35	220263287	220263346	INHA	inhibin, alpha	0	0	0	0.00806452
A_16_P00599328	2	chr2_q35	220306617	220306676	STK11IP	serine/threonine kinase 11 interacting protein	0	0	0	0.00806452
A_14_P201352	2	chr2_q35	220329475	220329534	SLC4A3	solute carrier family 4, anion exchanger, member 3	0	0	0	0.00806452
A_16_P16074976	2	chr2_q37.1	232032575	232032634	ARMC9	armadillo repeat containing 9	0	0	0	0.00806452
A_14_P133029	2	chr2_q37.1	232059169	232059228	AB058771		0	0	0	0.00806452
A_16_P16077297	2	chr2_q37.1	233071655	233071699	ALPP	alkaline phosphatase, placental (Regan isozyme)	0	0	0.0612245	0.016129
A_16_P00618391	2	chr2_q37.1	233077112	233077156	BC067110		0	0	0.0612245	0.016129
A_14_P110069	2	chr2_q37.1	233099731	233099777	ALPPL2	alkaline phosphatase, placental-like 2	0	0	0.0612245	0.016129
A_14_P127336	2	chr2_q37.3	238823889	238823939	ESPNL	espin-like	0	0	0	0.00806452
A_16_P16092220	2	chr2_q37.3	238834616	238834675	FLJ43374		0	0	0	0.00806452
A_16_P00627186	2	chr2_q37.3	238845582	238845641	C2orf19	chromosome 2 open reading frame 19	0	0	0	0.00806452
A_16_P16092285	2	chr2_q37.3	238853965	238854024	FAM132B	family with sequence similarity 132, member B	0	0	0	0.00806452
A_14_P119588	2	chr2_q37.3	238880579	238880635	ILKAP	integrin-linked kinase-associated serine/threonine phosphatase 2C	0	0	0	0.00806452
A_16_P16092410	2	chr2_q37.3	238910062	238910121	LOC151174	hypothetical protein LOC151174	0	0	0	0.00806452
A_16_P16092437	2	chr2_q37.3	238921316	238921368	AK057399		0	0	0	0.00806452
A_16_P16092450	2	chr2_q37.3	238924980	238925039	BC059397	CDNA clone IMAGE:4838775	0	0	0	0.00806452
A_14_P108705	2	chr2_q37.3	238928880	238928939	HES6	hairy and enhancer of split 6 (Drosophila)	0	0	0	0.00806452
A_16_P16094487	2	chr2_q37.3	239747755	239747811	HDAC4	histone deacetylase 4	0	0	0	0.00806452
A_16_P00630610	2	chr2_q37.3	241125726	241125781	GPC1	glypican 1	0	0.00806452	0	0.00806452
A_14_P139695	2	chr2_q37.3	241289181	241289225	GPR35	G protein-coupled receptor 35	0	0	0	0.00806452
A_16_P16098565	2	chr2_q37.3	241330638	241330697	AQP12A	aquaporin 12A	0	0	0	0.00806452
A_16_P00630850	2	chr2_q37.3	241348104	241348148	LOC285191	hypothetical protein LOC285191	0	0	0	0.00806452
A_16_P00631044	2	chr2_q37.3	241475463	241475519	KIF1A	kinesin family member 1A	0	0	0	0.00806452
A_16_P00631131	2	chr2_q37.3	241537498	241537542	AGXT	alanine-glyoxylate aminotransferase	0	0	0	0.00806452
A_14_P201230	2	chr2_q37.3	241550154	241550205	C2orf54	chromosome 2 open reading frame 54	0	0	0	0.00806452
A_16_P00631245	2	chr2_q37.3	241613136	241613195	LOC200772	hypothetical protein LOC200772	0	0	0	0.00806452
A_16_P16099391	2	chr2_q37.3	241621560	241621619	BC040629		0	0	0	0.00806452
A_16_P16101492	2	chr2_q37.3	242464530	242464574	NEU4	sialidase 4	0	0	0.0408163	0.016129
A_16_P00632214	2	chr2_q37.3	242633011	242633056	AK097934	CDNA FLJ40615 fis, clone THYMU2012882	0	0	0.0408163	0.016129
A_16_P00632242	2	chr2_q37.3	242653934	242653993	AK125674		0	0	0.0612245	0.0241935
A_16_P16101677	2	chr2_q37.3	242658387	242658446	FLJ38379	hypothetical protein FLJ38379	0	0	0.0612245	0.0241935
A_16_P00632349	2	chr2_q37.3	242784096	242784149	BC071667		0	0	0.0204082	0.0241935
A_16_P00638752	3	chr3_p26.1	4278981	4279040	AY358092		0	0	0	0.00806452
A_16_P00646014	3	chr3_p25.3	9411558	9411617	LOC440944	hypothetical gene supported by AK128398	0	0	0	0.00806452
A_14_P104499	3	chr3_p25.3	9450925	9450984	SETD5	SET domain containing 5	0	0	0	0.00806452
A_16_P00657446	3	chr3_p24.3	17674240	17674299	TBC1D5	TBC1 domain family, member 5	0	0	0.0204082	0
A_14_P125468	3	chr3_p23	33108881	33108940	GLB1	galactosidase, beta 1	0	0.00806452	0	0
A_16_P00679407	3	chr3_p23	33163030	33163089	CRTAP	cartilage associated protein	0	0.00806452	0	0
A_16_P00679492	3	chr3_p23	33230865	33230924	SUSD5	sushi domain containing 5	0	0.00806452	0	0
A_16_P16181880	3	chr3_p23	33389632	33389691	FBXL2	F-box and leucine-rich repeat protein 2	0	0.00806452	0	0
A_14_P201086	3	chr3_p23	33442227	33442286	UBP1	upstream binding protein 1 (LBP-1a)	0	0.00806452	0	0
A_16_P36221483	3	chr3_p23	33733023	33733082	CLASP2	cytoplasmic linker associated protein 2	0	0.00806452	0	0
A_14_P201549	3	chr3_p23	33884779	33884838	PDCD6IP	programmed cell death 6 interacting protein	0	0.00806452	0	0
A_16_P16185689	3	chr3_p23	35129092	35129151	BC035904	Homo sapiens, clone IMAGE:5245882, mRNA	0	0.00806452	0	0
A_14_P119861	3	chr3_p22.3	35810531	35810590	ARPP-21	cyclic AMP-regulated phosphoprotein, 21 kD	0	0.00806452	0	0
A_14_P115545	3	chr3_p22.3	38000446	38000505	CTDSPL	CTD (carboxy-terminal domain, RNA polymerase II, polypeptide A) small phosphatase-like	0	0	0	0.00806452
A_14_P112369	3	chr3_p22.3	38022037	38022095	VILL	villin-like	0	0	0	0.00806452
A_14_P127630	3	chr3_p22.3	38045070	38045128	PLCD1	phospholipase C, delta 1	0	0	0	0.00806452
A_16_P00686080	3	chr3_p22.3	38134940	38134999	DLEC1	deleted in lung and esophageal cancer 1	0	0	0	0.00806452
A_16_P16203034	3	chr3_p22.1	42781459	42781518	HIGD1A	HIG1 domain family, member 1A	0	0	0	0.0403226
A_16_P00699628	3	chr3_p21.31	48511151	48511210	SCOTIN		0	0	0	0.00806452
A_16_P16216234	3	chr3_p21.31	48567914	48567972	PFKFB4	6-phosphofructo-2-kinase/fructose-2,6-biphosphatase 4	0	0	0	0.00806452
A_16_P00699719	3	chr3_p21.31	48572849	48572900	UCN2	urocortin 2	0	0	0	0.00806452
A_16_P16216353	3	chr3_p21.31	48600544	48600596	COL7A1	collagen, type VII, alpha 1 (epidermolysis bullosa, dystrophic, dominant and recessive)	0	0.00806452	0.0204082	0.00806452
A_16_P00699811	3	chr3_p21.31	48608799	48608850	UQCRC1	ubiquinol-cytochrome c reductase core protein I	0	0	0.0204082	0
A_14_P139255	3	chr3_p21.31	49695898	49695951	APEH	N-acylaminoacyl-peptide hydrolase	0	0	0.0204082	0.00806452
A_16_P36259568	3	chr3_p21.31	49696409	49696458	MST1	macrophage stimulating 1 (hepatocyte growth factor-like)	0	0	0.0408163	0.00806452
A_14_P131061	3	chr3_p21.31	49733917	49733971	RNF123	ring finger protein 123	0	0	0.0408163	0.00806452
A_14_P200092	3	chr3_p21.31	49735068	49735113	GMPPB	GDP-mannose pyrophosphorylase B	0	0	0.0408163	0.00806452
A_16_P00701226	3	chr3_p21.31	49739433	49739492	IHPK1	inositol hexaphosphate kinase 1	0	0	0.0408163	0.00806452
A_16_P16219303	3	chr3_p21.31	49913972	49914027	MST1R	macrophage stimulating 1 receptor (c-met-related tyrosine kinase)	0	0	0	0.00806452
A_14_P135216	3	chr3_p21.31	49922094	49922145	MON1A	MON1 homolog A (yeast)	0	0	0	0.00806452
A_16_P00701782	3	chr3_p21.31	50156213	50156268	AK125500		0	0	0.0204082	0
A_16_P00701851	3	chr3_p21.31	50197049	50197099	SEMA3F	sema domain, immunoglobulin domain (Ig), short basic domain, secreted, (semaphorin) 3F	0	0	0.0204082	0
A_14_P114750	3	chr3_p21.31	50205730	50205774	GNAT1	guanine nucleotide binding protein (G protein), alpha transducing activity polypeptide 1	0	0	0.0204082	0
A_16_P36261079	3	chr3_p21.31	50227181	50227235	SLC38A3	solute carrier family 38, member 3	0	0	0.0204082	0
A_16_P00701931	3	chr3_p21.31	50240630	50240689	AK096595		0	0	0.0204082	0
A_16_P16220201	3	chr3_p21.31	50270684	50270737	GNAI2	guanine nucleotide binding protein (G protein), alpha inhibiting activity polypeptide 2	0	0	0.0204082	0
A_16_P00701993	3	chr3_p21.31	50274167	50274218	BC033528	CDNA clone IMAGE:4822684	0	0	0.0204082	0
A_14_P104255	3	chr3_p21.31	50286916	50286964	SEMA3B	sema domain, immunoglobulin domain (Ig), short basic domain, secreted, (semaphorin) 3B	0	0	0.0204082	0
A_14_P132478	3	chr3_p21.31	50298588	50298642	C3orf45		0	0	0.0204082	0
A_14_P123479	3	chr3_p21.31	50301542	50301593	IFRD2	interferon-related developmental regulator 2	0	0	0.0204082	0
A_14_P125653	3	chr3_p21.31	50308999	50309043	HYAL3	hyaluronoglucosaminidase 3	0	0	0.0204082	0
A_16_P16220336	3	chr3_p21.31	50317219	50317266	HYAL1	hyaluronoglucosaminidase 1	0	0	0.0204082	0
A_16_P00702339	3	chr3_p21.31	50454102	50454161	CACNA2D2	calcium channel, voltage-dependent, alpha 2/delta subunit 2	0	0	0.0204082	0
A_16_P00704595	3	chr3_p21.2	52319749	52319808	DNAH1	dynein, axonemal, heavy chain 1	0	0	0	0.016129
A_14_P128339	3	chr3_p21.1	52418249	52418308	BAP1	BRCA1 associated protein-1 (ubiquitin carboxy-terminal hydrolase)	0	0	0	0.00806452
A_14_P100132	3	chr3_p21.1	52432656	52432715	PHF7	PHD finger protein 7	0	0	0	0.00806452
A_16_P16224988	3	chr3_p21.1	52452061	52452107	SEMA3G	sema domain, immunoglobulin domain (Ig), short basic domain, secreted, (semaphorin) 3G	0	0	0	0.00806452
A_14_P135835	3	chr3_p21.1	52462711	52462763	TNNC1	troponin C type 1 (slow)	0	0	0	0.00806452
A_16_P00704874	3	chr3_p21.1	52479382	52479440	NISCH	nischarin	0	0	0	0.00806452
A_14_P120947	3	chr3_p14.3	58131639	58131698	FLNB	filamin B, beta (actin binding protein 278)	0	0	0	0.00806452
A_16_P00713611	3	chr3_p14.3	58165251	58165306	DNASE1L3	deoxyribonuclease I-like 3	0	0	0	0.00806452
A_16_P16243964	3	chr3_p14.2	60019721	60019780	FHIT	fragile histidine triad gene	0	0	0.0204082	0.00806452
A_16_P00725838	3	chr3_p14.1	65964716	65964775	MAGI1	membrane associated guanylate kinase, WW and PDZ domain containing 1	0	0	0.0204082	0
A_16_P16266503	3	chr3_p14.1	69059797	69059856	FAM19A4		0	0.00806452	0	0
A_16_P16266723	3	chr3_p14.1	69140363	69140422	C3orf64	chromosome 3 open reading frame 64	0	0.00806452	0	0
A_16_P00730037	3	chr3_p14.1	69325860	69325919	TMF1	TATA element modulatory factor 1	0	0.00806452	0	0
A_16_P16267702	3	chr3_p14.1	69508643	69508702	FRMD4B	FERM domain containing 4B	0	0.00806452	0	0
A_16_P00730542	3	chr3_p14.1	69670943	69671002	AK091076		0	0.00806452	0	0
A_14_P112356	3	chr3_p14.1	70098546	70098605	MITF		0	0.00806452	0	0
A_16_P16269346	3	chr3_p13	70136669	70136728	BC015590	CDNA clone IMAGE:4643842	0	0.00806452	0	0
A_14_P139726	3	chr3_p13	71815940	71815999	EIF4E3	eukaryotic translation initiation factor 4E family member 3	0	0	0	0.00806452
A_14_P112577	3	chr3_p12.3	79721705	79721762	ROBO1	roundabout, axon guidance receptor, homolog 1 (Drosophila)	0	0.00806452	0	0
A_16_P36342453	3	chr3_p12.2	81881858	81881917	GBE1	glucan (1,4-alpha-), branching enzyme 1 (glycogen branching enzyme, Andersen disease, glycogen storage disease type IV)	0	0.00806452	0	0
A_16_P16301249	3	chr3_p12.2	82585958	82586017	BC031255		0	0.00806452	0	0
A_16_P36349188	3	chr3_p12.1	84985751	84985810	BC068246		0	0.00806452	0	0
A_14_P201611	3	chr3_p12.1	86200499	86200558	CADM2	cell adhesion molecule 2	0	0.00806452	0	0
A_16_P16310667	3	chr3_p12.1	86617153	86617212	BC035252	CDNA clone IMAGE:5258895	0	0.00806452	0	0
A_16_P16311839	3	chr3_p12.1	87118435	87118494	VGLL3	vestigial like 3 (Drosophila)	0	0.00806452	0	0
A_14_P116487	3	chr3_p11.2	87386916	87386974	CHMP2B	chromatin modifying protein 2B	0	0.00806452	0	0
A_14_P132146	3	chr3_p11.2	87406026	87406085	POU1F1	POU class 1 homeobox 1	0	0.00806452	0	0
A_16_P36422176	3	chr3_q13.32	120300137	120300196	IGSF11		0	0.00806452	0	0
A_16_P00801054	3	chr3_q21.1	124333178	124333237	PDIA5	protein disulfide isomerase family A, member 5	0	0	0	0.00806452
A_16_P16388185	3	chr3_q21.1	124942802	124942861	MYLK	myosin, light chain kinase	0	0	0	0.00806452
A_14_P125652	3	chr3_q21.2	128161891	128161948	CHCHD6	coiled-coil-helix-coiled-coil-helix domain containing 6	0	0	0	0.016129
A_16_P00806375	3	chr3_q21.2	128177926	128177983	AK126748		0	0	0	0.016129
A_16_P00806437	3	chr3_q21.2	128208494	128208546	PLXNA1	plexin A1	0	0	0	0.016129
A_14_P102146	3	chr3_q22.3	137531767	137531826	PCCB	propionyl Coenzyme A carboxylase, beta polypeptide	0	0	0.0204082	0
A_16_P00819179	3	chr3_q22.3	137653546	137653605	STAG1	stromal antigen 1	0	0	0.0204082	0
A_16_P16428871	3	chr3_q23	142571043	142571102	BC015444	Homo sapiens, clone IMAGE:4453504, mRNA	0	0.00806452	0	0
A_16_P00825695	3	chr3_q23	142645140	142645198	ZBTB38	zinc finger and BTB domain containing 38	0	0.00806452	0	0
A_16_P36500633	3	chr3_q25.1	153028971	153029030	AADAC	arylacetamide deacetylase (esterase)	0	0	0	0.016129
A_14_P108100	3	chr3_q25.2	154038216	154038275	P2RY1	purinergic receptor P2Y, G-protein coupled, 1	0	0.00806452	0	0
A_14_P103936	3	chr3_q25.2	154364353	154364412	RAP2B	RAP2B, member of RAS oncogene family	0	0.00806452	0	0
A_16_P16457789	3	chr3_q25.2	154585701	154585760	AK092619		0	0.00806452	0	0
A_16_P16458001	3	chr3_q25.2	154698130	154698189	LOC152118	hypothetical protein LOC152118	0	0.00806452	0	0
A_16_P00843793	3	chr3_q25.2	155318029	155318088	BC038431		0	0.00806452	0	0
A_16_P36506501	3	chr3_q25.2	155449788	155449847	SGEF		0	0.00806452	0	0
A_16_P00844117	3	chr3_q25.2	155516547	155516606	DHX36	DEAH (Asp-Glu-Ala-His) box polypeptide 36	0	0.00806452	0	0
A_16_P16459919	3	chr3_q25.2	155541574	155541633	GPR149		0	0.00806452	0	0
A_16_P16465230	3	chr3_q25.31	157904116	157904175	TIPARP	TCDD-inducible poly(ADP-ribose) polymerase	0	0.00806452	0	0
A_16_P16465321	3	chr3_q25.31	157933556	157933615	LOC730091	hypothetical protein LOC730091	0	0.00806452	0	0
A_16_P00847382	3	chr3_q25.31	157952542	157952601	AK056401	Transcribed locus	0	0.00806452	0	0
A_16_P36526865	3	chr3_q26.1	164086913	164086972	BC019327		0.0408163	0.00806452	0.0612245	0.169355
A_16_P36537991	3	chr3_q26.1	169288550	169288609	GOLPH4	---	0	0.00806452	0	0
A_16_P36539813	3	chr3_q26.2	170018667	170018726	C3orf50	chromosome 3 open reading frame 50	0	0.00806452	0	0
A_14_P137360	3	chr3_q26.2	172998713	172998772	PLD1	phospholipase D1, phosphatidylcholine-specific	0	0.00806452	0	0
A_16_P16500323	3	chr3_q26.31	173052348	173052407	AK026825		0	0.00806452	0	0
A_16_P16501503	3	chr3_q26.31	173485427	173485486	FNDC3B	CDNA: FLJ21351 fis, clone COL02762	0	0.00806452	0	0
A_14_P117223	3	chr3_q26.31	175716430	175716489	AJ607399	Transcribed locus	0	0	0	0.00806452
A_14_P128550	3	chr3_q26.32	178392092	178392151	TBL1XR1	transducin (beta)-like 1X-linked receptor 1	0	0.00806452	0	0
A_14_P127652	3	chr3_q26.32	178523091	178523150	AK055528		0	0.00806452	0	0
A_16_P00877435	3	chr3_q26.32	179084794	179084853	AK056252		0	0.00806452	0	0
A_16_P16516315	3	chr3_q26.32	179581316	179581375	AK091755		0	0.00806452	0	0
A_14_P127542	3	chr3_q26.32	179726973	179727032	AF279780	NTera2D1 cell line mRNA containing L1 retroposon, clone P7	0	0.00806452	0	0
A_14_P107249	3	chr3_q26.32	180043461	180043520	KCNMB2		0	0.00806452	0	0
A_16_P16517778	3	chr3_q26.32	180217900	180217959	BC036485	CDNA clone IMAGE:5261213	0	0.00806452	0	0
A_14_P123484	3	chr3_q26.32	180268270	180268326	ZMAT3	zinc finger, matrin type 3	0	0.00806452	0	0
A_16_P16517984	3	chr3_q26.32	180346065	180346124	BC032034	CDNA clone IMAGE:4821793	0	0.00806452	0	0
A_14_P127878	3	chr3_q26.32	180430745	180430804	PIK3CA		0	0.00806452	0	0
A_16_P00879299	3	chr3_q26.32	180465868	180465927	KCNMB3	potassium large conductance calcium-activated channel, subfamily M beta member 3	0	0.00806452	0	0
A_14_P129206	3	chr3_q26.32	180535303	180535362	ZNF639	zinc finger protein 639	0	0.00806452	0	0
A_16_P16518590	3	chr3_q26.32	180593235	180593294	MFN1	mitofusin 1	0	0.00806452	0	0
A_16_P00879483	3	chr3_q26.32	180600648	180600707	GNB4	guanine nucleotide binding protein (G protein), beta polypeptide 4	0	0.00806452	0	0
A_14_P103842	3	chr3_q26.33	181808368	181808427	TTC14	tetratricopeptide repeat domain 14	0	0.00806452	0	0
A_16_P16521458	3	chr3_q26.33	181833027	181833086	CCDC39	coiled-coil domain containing 39	0	0.00806452	0	0
A_16_P16530482	3	chr3_q27.1	185557247	185557306	CLCN2	chloride channel 2	0	0	0	0.00806452
A_14_P116745	3	chr3_q27.1	185567250	185567304	POLR2H	polymerase (RNA) II (DNA directed) polypeptide H	0	0	0.0612245	0.00806452
A_14_P118539	3	chr3_q27.1	185573293	185573340	THPO	thrombopoietin (myeloproliferative leukemia virus oncogene ligand, megakaryocyte growth and development factor)	0	0	0.0612245	0.00806452
A_14_P102350	3	chr3_q27.1	185587937	185587982	CHRD	chordin	0	0	0.0612245	0.00806452
A_14_P118212	3	chr3_q27.3	187877436	187877495	HRG	histidine-rich glycoprotein	0	0	0	0.00806452
A_14_P201277	3	chr3_q27.3	188571913	188571972	RTP4	receptor (chemosensory) transporter protein 4	0	0.00806452	0	0
A_16_P00890760	3	chr3_q27.3	188583753	188583812	AK127405		0	0.00806452	0	0
A_14_P130547	3	chr3_q27.3	188870077	188870136	SST	somatostatin	0	0.00806452	0	0
A_16_P00891168	3	chr3_q27.3	188901066	188901125	RTP2		0	0.00806452	0	0
A_16_P16538383	3	chr3_q27.3	188943658	188943717	BCL6	B-cell CLL/lymphoma 6 (zinc finger protein 51)	0	0.00806452	0	0
A_16_P16539468	3	chr3_q27.3	189345968	189346027	LOC339929	hypothetical protein LOC339929	0	0.00806452	0	0
A_14_P131019	3	chr3_q27.3	190075123	190075182	LPP	LIM domain containing preferred translocation partner in lipoma	0	0.00806452	0	0
A_16_P00893659	3	chr3_q28	190340933	190340992	BX641108	CDNA FLJ30652 fis, clone DFNES2000011	0	0.00806452	0	0
A_16_P16542300	3	chr3_q28	190349796	190349855	FAM79B	Family with sequence similarity 79, member B	0	0.00806452	0	0
A_14_P130661	3	chr3_q28	191080593	191080642	TP63	tumor protein p63	0	0.00806452	0	0
A_16_P16545303	3	chr3_q28	191521916	191521975	CLDN1	Claudin 1	0	0	0.0204082	0
A_16_P16558124	3	chr3_q29	196933718	196933777	TFRC	transferrin receptor (p90, CD71)	0	0	0.0816327	0
A_16_P36614329	4	chr4_p16.3	563982	564041	AK123125	MRNA; cDNA DKFZp564M236 (from clone DKFZp564M236)	0	0	0	0.00806452
A_16_P36614516	4	chr4_p16.3	652014	652073	PDE6B	MRNA; cDNA DKFZp564M236 (from clone DKFZp564M236)	0	0	0	0.00806452
A_14_P128801	4	chr4_p16.3	657099	657148	ATP5I	MRNA; cDNA DKFZp564M236 (from clone DKFZp564M236)	0	0	0	0.00806452
A_16_P36614564	4	chr4_p16.3	663677	663721	MYL5	MRNA; cDNA DKFZp564M236 (from clone DKFZp564M236)	0	0	0	0.00806452
A_14_P128206	4	chr4_p16.3	671739	671791	MFSD7	MRNA; cDNA DKFZp564M236 (from clone DKFZp564M236)	0	0	0	0.00806452
A_16_P00906521	4	chr4_p16.3	751304	751363	PCGF3	MRNA; cDNA DKFZp564M236 (from clone DKFZp564M236)	0	0	0	0.00806452
A_16_P00906586	4	chr4_p16.3	806855	806910	CPLX1	MRNA; cDNA DKFZp564M236 (from clone DKFZp564M236)	0	0	0	0.00806452
A_16_P36615279	4	chr4_p16.3	909062	909121	GAK	cyclin G associated kinase	0	0	0	0.00806452
A_16_P00906765	4	chr4_p16.3	942236	942295	TMEM175	transmembrane protein 175	0	0	0	0.00806452
A_16_P00906787	4	chr4_p16.3	954346	954401	DGKQ	diacylglycerol kinase, theta 110kDa	0	0	0	0.00806452
A_16_P16565853	4	chr4_p16.3	984969	985013	SLC26A1	solute carrier family 26 (sulfate transporter), member 1	0	0	0	0.016129
A_16_P00906852	4	chr4_p16.3	1010247	1010306	FGFRL1	fibroblast growth factor receptor-like 1	0	0	0	0.016129
A_16_P36615849	4	chr4_p16.3	1091605	1091664	RNF212	ring finger protein 212	0	0	0	0.00806452
A_16_P00907008	4	chr4_p16.3	1136597	1136656	FLJ35816	FLJ35816 protein	0	0	0	0.00806452
A_14_P130673	4	chr4_p16.3	1153155	1153202	SPON2	spondin 2, extracellular matrix protein	0	0	0	0.00806452
A_14_P117618	4	chr4_p16.3	1195128	1195177	LOC285463	hypothetical protein LOC285463	0	0	0	0.00806452
A_16_P00907134	4	chr4_p16.3	1230468	1230527	CTBP1	C-terminal binding protein 1	0	0	0	0.00806452
A_14_P102349	4	chr4_p16.3	1235568	1235623	C4orf42	chromosome 4 open reading frame 42	0	0	0	0.00806452
A_16_P00907151	4	chr4_p16.3	1249496	1249555	MGC21675	Hypothetical protein MGC21675	0	0	0	0.00806452
A_16_P16566514	4	chr4_p16.3	1261339	1261398	AK125775		0	0	0	0.00806452
A_14_P136594	4	chr4_p16.3	1322963	1323022	MAEA	macrophage erythroblast attacher	0	0	0	0.00806452
A_16_P00907312	4	chr4_p16.3	1365841	1365898	KIAA1530	KIAA1530	0	0	0	0.00806452
A_14_P104978	4	chr4_p16.3	1379480	1379538	CRIPAK	cysteine-rich PAK1 inhibitor	0	0	0	0.00806452
A_16_P16566848	4	chr4_p16.3	1384216	1384260	NKX1-1	NK1 homeobox 1	0	0	0	0.00806452
A_16_P00907638	4	chr4_p16.3	1650815	1650872	FAM53A	family with sequence similarity 53, member A	0	0	0	0.016129
A_16_P00907646	4	chr4_p16.3	1655328	1655387	SLBP	stem-loop (histone) binding protein	0	0	0	0.016129
A_14_P127636	4	chr4_p16.3	1687747	1687805	TMEM129	transmembrane protein 129	0	0	0	0.00806452
A_16_P00907724	4	chr4_p16.3	1714059	1714118	TACC3	transforming, acidic coiled-coil containing protein 3	0	0	0	0.00806452
A_14_P132738	4	chr4_p16.3	1777262	1777321	FGFR3	fibroblast growth factor receptor 3 (achondroplasia, thanatophoric dwarfism)	0	0	0	0.00806452
A_16_P00907890	4	chr4_p16.3	1816323	1816382	LETM1	leucine zipper-EF-hand containing transmembrane protein 1	0	0	0	0.00806452
A_14_P134608	4	chr4_p16.3	1846231	1846290	BC052254		0	0	0	0.00806452
A_16_P36617897	4	chr4_p16.3	1873119	1873178	WHSC1	Wolf-Hirschhorn syndrome candidate 1	0	0	0	0.00806452
A_14_P108732	4	chr4_p16.1	7550081	7550140	PSAPL1	prosaposin-like 1	0	0	0	0.00806452
A_16_P00916214	4	chr4_p16.1	8273081	8273140	ABLIM2		0	0	0	0.00806452
A_16_P00916359	4	chr4_p16.1	8360849	8360908	SH3TC1		0	0	0	0.00806452
A_16_P00916453	4	chr4_p16.1	8416234	8416293	HTRA3	HtrA serine peptidase 3	0	0	0	0.00806452
A_14_P120589	4	chr4_p16.1	8706077	8706129	GPR78	G protein-coupled receptor 78	0	0	0	0.00806452
A_16_P16584326	4	chr4_p16.1	8739523	8739582	CPZ	carboxypeptidase Z	0	0	0	0.00806452
A_14_P111830	4	chr4_p15.1	30820718	30820777	PCDH7	protocadherin 7	0	0.00806452	0	0
A_16_P36712066	4	chr4_p14	41045537	41045596	APBB2	amyloid beta (A4) precursor protein-binding, family B, member 2 (Fe65-like)	0	0	0.0204082	0
A_16_P16661277	4	chr4_p13	41318282	41318341	KIAA1102		0	0	0.0204082	0
A_16_P36737379	4	chr4_q12	55313934	55313993	BC043566		0	0.00806452	0	0
A_14_P122291	4	chr4_q12	55447361	55447420	KIT	v-kit Hardy-Zuckerman 4 feline sarcoma viral oncogene homolog	0	0.00806452	0	0
A_16_P16686543	4	chr4_q12	55828163	55828222	KDR	kinase insert domain receptor (a type III receptor tyrosine kinase)	0	0.00806452	0	0
A_16_P00977222	4	chr4_q12	56074658	56074717	SRD5A3	steroid 5 alpha-reductase 3	0	0.00806452	0	0
A_16_P16687048	4	chr4_q12	56090069	56090128	BC047403	CDNA clone IMAGE:5295612	0	0.00806452	0	0
A_16_P00977288	4	chr4_q12	56124189	56124248	TMEM165	transmembrane protein 165	0	0.00806452	0	0
A_14_P126107	4	chr4_q12	56135508	56135567	BC040570	CDNA clone IMAGE:5267398	0	0.00806452	0	0
A_14_P116348	4	chr4_q12	56238291	56238350	CLOCK	clock homolog (mouse)	0	0.00806452	0	0
A_16_P16687510	4	chr4_q12	56287576	56287635	PDCL2	phosducin-like 2	0	0.00806452	0	0
A_14_P139156	4	chr4_q12	56341489	56341548	NMU	neuromedin U	0	0.00806452	0	0
A_14_P110427	4	chr4_q12	56606875	56606934	EXOC1		0	0.00806452	0	0
A_14_P200865	4	chr4_q12	56738942	56739001	CEP135	centrosomal protein 135kDa	0	0.00806452	0	0
A_16_P16689142	4	chr4_q12	57008295	57008354	AK126014		0	0.00806452	0	0
A_14_P114791	4	chr4_q12	57034991	57035050	KIAA1211	KIAA1211 protein	0	0.00806452	0	0
A_14_P115914	4	chr4_q12	57088951	57089010	AASDH	aminoadipate-semialdehyde dehydrogenase	0	0.00806452	0	0
A_16_P16689449	4	chr4_q12	57126796	57126853	PPAT	phosphoribosyl pyrophosphate amidotransferase	0	0.00806452	0	0
A_16_P36766227	4	chr4_q13.2	68132193	68132252	AK093203	CDNA FLJ35884 fis, clone TESTI2008960	0	0.00806452	0	0
A_14_P113788	4	chr4_q13.2	69260239	69260298	UGT2B17	UDP glucuronosyltransferase 2 family, polypeptide B17	0.0204082	0.00806452	0.163265	0.217742
A_16_P16716224	4	chr4_q13.2	69299846	69299905	U06641		0.0204082	0.00806452	0.163265	0.217742
A_16_P00994384	4	chr4_q13.2	69311985	69312043	TMPRSS11E	transmembrane protease, serine 11E	0.0204082	0.00806452	0.163265	0.217742
A_16_P16716992	4	chr4_q13.2	69870766	69870813	UGT2B10		0	0	0	0.00806452
A_16_P36770563	4	chr4_q13.2	70334625	70334684	UGT2B28	UDP glucuronosyltransferase 2 family, polypeptide B28	0	0	0.0204082	0.016129
A_16_P00995394	4	chr4_q13.3	70904027	70904086	SULT1E1	sulfotransferase family 1E, estrogen-preferring, member 1	0.0204082	0	0	0
A_16_P36771920	4	chr4_q13.3	70991273	70991332	CSN1S1	casein alpha s1	0.0204082	0.00806452	0	0
A_16_P16719261	4	chr4_q13.3	71006309	71006368	CSN2	casein beta	0.0204082	0.00806452	0	0
A_16_P16719362	4	chr4_q13.3	71048673	71048732	STATH	statherin	0.0204082	0.00806452	0	0
A_14_P200122	4	chr4_q13.3	71079559	71079618	HTN3	histatin 3	0.0204082	0.00806452	0	0
A_16_P16719471	4	chr4_q13.3	71101252	71101311	HTN1	histatin 1	0.0204082	0.00806452	0	0
A_16_P36772240	4	chr4_q13.3	71121688	71121747	CSN1S2A	casein alpha s2-like A	0.0204082	0.00806452	0	0
A_16_P16719712	4	chr4_q13.3	71198902	71198961	BX648896		0.0204082	0.00806452	0	0
A_16_P36772475	4	chr4_q13.3	71210943	71211002	LOC401137		0.0204082	0.00806452	0	0
A_14_P104420	4	chr4_q13.3	71244884	71244943	ODAM	odontogenic, ameloblast asssociated	0.0204082	0.00806452	0	0
A_14_P105882	4	chr4_q13.3	71250968	71251027	APIN		0.0204082	0.00806452	0	0
A_14_P102159	4	chr4_q13.3	71277701	71277750	C4orf7	chromosome 4 open reading frame 7	0.0204082	0.00806452	0	0
A_16_P00995984	4	chr4_q13.3	71297714	71297773	CSN3	casein kappa	0.0204082	0.00806452	0	0
A_14_P123245	4	chr4_q13.3	71382662	71382721	C4orf35	chromosome 4 open reading frame 35	0.0204082	0.00806452	0	0
A_14_P114201	4	chr4_q13.3	71410961	71411020	SMR3A	submaxillary gland androgen regulated protein 3 homolog A (mouse)	0.0204082	0.00806452	0	0
A_14_P105645	4	chr4_q13.3	71435285	71435344	SMR3B	submaxillary gland androgen regulated protein 3 homolog B (mouse)	0.0204082	0.00806452	0	0
A_14_P112051	4	chr4_q13.3	71456025	71456084	PROL1	proline rich, lacrimal 1	0.0204082	0.00806452	0	0
A_14_P201876	4	chr4_q13.3	71528909	71528968	MUC7	mucin 7, secreted	0.0204082	0.00806452	0	0
A_16_P36773429	4	chr4_q13.3	71579179	71579238	UNQ689		0.0204082	0.00806452	0	0
A_14_P137035	4	chr4_q13.3	71653344	71653403	AMBN	ameloblastin (enamel matrix protein)	0.0204082	0.00806452	0	0
A_14_P131995	4	chr4_q13.3	71875477	71875536	ENAM	enamelin	0.0204082	0.00806452	0	0
A_14_P114615	4	chr4_q13.3	71897222	71897281	IGJ	Immunoglobulin J polypeptide, linker protein for immunoglobulin alpha and mu polypeptides	0.0204082	0.00806452	0	0
A_16_P16721046	4	chr4_q13.3	71911043	71911102	UTP3	UTP3, small subunit (SSU) processome component, homolog (S. cerevisiae)	0.0204082	0.00806452	0	0
A_14_P129584	4	chr4_q13.3	71921003	71921062	SAS10		0.0204082	0.00806452	0	0
A_16_P00996765	4	chr4_q13.3	72037681	72037740	RUFY3	RUN and FYVE domain containing 3	0.0204082	0.00806452	0	0
A_14_P130688	4	chr4_q13.3	72066974	72067022	GRSF1	G-rich RNA sequence binding factor 1	0.0204082	0.00806452	0	0
A_16_P36774549	4	chr4_q13.3	72217590	72217649	MOBKL1A		0.0204082	0.00806452	0	0
A_16_P16721825	4	chr4_q13.3	72260721	72260780	DCK	deoxycytidine kinase	0.0204082	0.016129	0	0
A_14_P100967	4	chr4_q13.3	72794560	72794619	SLC4A4	solute carrier family 4, sodium bicarbonate cotransporter, member 4	0.0204082	0.016129	0	0
A_16_P16723589	4	chr4_q13.3	73014678	73014737	GC	group-specific component (vitamin D binding protein)	0.0204082	0.00806452	0	0
A_16_P16723619	4	chr4_q13.3	73034394	73034453	AK223458		0.0204082	0.00806452	0	0
A_14_P134741	4	chr4_q13.3	73378496	73378555	NPFFR2		0.0204082	0.016129	0	0
A_16_P36777597	4	chr4_q13.3	73576395	73576454	ADAMTS3	ADAM metallopeptidase with thrombospondin type 1 motif, 3	0	0.016129	0	0
A_16_P36779132	4	chr4_q13.3	74299886	74299945	COX18	COX18 cytochrome c oxidase assembly homolog (S. cerevisiae)	0.0204082	0.00806452	0	0
A_16_P00999953	4	chr4_q13.3	74485146	74485205	ANKRD17	ankyrin repeat domain 17	0.0204082	0.00806452	0	0
A_16_P01000132	4	chr4_q13.3	74648965	74649024	ALB	albumin	0.0204082	0.00806452	0	0
A_14_P200123	4	chr4_q13.3	74683145	74683204	AFP	alpha-fetoprotein	0.0204082	0.00806452	0	0
A_16_P01000254	4	chr4_q13.3	74730754	74730813	AFM	afamin	0.0204082	0.016129	0	0
A_14_P111961	4	chr4_q13.3	74756162	74756221	hCG_1813624	hCG1813624	0.0204082	0.016129	0	0
A_14_P107048	4	chr4_q13.3	74849878	74849937	RASSF6	Ras association (RalGDS/AF-6) domain family 6	0.0204082	0.016129	0	0
A_14_P105298	4	chr4_q13.3	74974180	74974239	IL8	interleukin 8	0.0204082	0.016129	0	0
A_14_P129158	4	chr4_q13.3	75068765	75068824	CXCL6	chemokine (C-X-C motif) ligand 6 (granulocyte chemotactic protein 2)	0.0204082	0.016129	0	0
A_16_P01000730	4	chr4_q13.3	75083413	75083472	PF4V1	platelet factor 4 variant 1	0.0204082	0.016129	0	0
A_16_P16728048	4	chr4_q13.3	75097823	75097882	CXCL1	chemokine (C-X-C motif) ligand 1 (melanoma growth stimulating activity, alpha)	0.0204082	0.016129	0	0
A_14_P122389	4	chr4_q13.3	75211884	75211943	PF4	platelet factor 4 (chemokine (C-X-C motif) ligand 4)	0.0204082	0.016129	0	0
A_14_P108762	4	chr4_q13.3	75217929	75217988	PPBP	pro-platelet basic protein (chemokine (C-X-C motif) ligand 7)	0.0204082	0.016129	0	0
A_14_P109443	4	chr4_q13.3	75227856	75227915	CXCL5	chemokine (C-X-C motif) ligand 5	0.0204082	0.016129	0	0
A_14_P117173	4	chr4_q13.3	75268409	75268459	CXCL3	chemokine (C-X-C motif) ligand 3	0.0204082	0.016129	0	0
A_14_P139439	4	chr4_q13.3	75285673	75285731	PPBPL2	pro-platelet basic protein-like 2	0.0204082	0.016129	0	0
A_14_P132400	4	chr4_q13.3	75328235	75328294	CXCL2	chemokine (C-X-C motif) ligand 2	0.0204082	0.016129	0	0
A_16_P36781957	4	chr4_q13.3	75533093	75533152	MTHFD2L	methylenetetrahydrofolate dehydrogenase (NADP+ dependent) 2-like	0.0204082	0.016129	0	0
A_16_P16728994	4	chr4_q13.3	75544079	75544138	EPGN		0.0204082	0.016129	0	0
A_16_P16729041	4	chr4_q13.3	75558909	75558968	BC016361		0.0204082	0.016129	0	0
A_16_P16729200	4	chr4_q13.3	75618934	75618993	EREG	epiregulin	0.0204082	0.016129	0	0
A_14_P115708	4	chr4_q13.3	75685534	75685589	AREG	amphiregulin (schwannoma-derived growth factor)	0.0204082	0.016129	0	0
A_14_P122897	4	chr4_q13.3	76075539	76075598	BTC	betacellulin	0.0204082	0.016129	0	0
A_14_P201076	4	chr4_q13.3	76328623	76328682	DKFZP564O0823	DKFZP564O0823 protein	0.0408163	0.00806452	0	0
A_14_P103656	4	chr4_q21.1	76791267	76791326	RCHY1	ring finger and CHY zinc finger domain containing 1	0.0408163	0.00806452	0	0
A_14_P101443	4	chr4_q21.1	76810732	76810791	THAP6	THAP domain containing 6	0.0408163	0.00806452	0	0
A_16_P01002870	4	chr4_q21.1	76822540	76822599	AK056959		0.0408163	0.00806452	0	0
A_14_P126427	4	chr4_q21.1	76843716	76843775	C4orf26	chromosome 4 open reading frame 26	0.0408163	0.00806452	0	0
A_14_P114191	4	chr4_q21.1	76908242	76908301	CDKL2	cyclin-dependent kinase-like 2 (CDC2-related kinase)	0.0408163	0.00806452	0	0
A_16_P36784971	4	chr4_q21.1	76951148	76951207	G3BP2	GTPase activating protein (SH3 domain) binding protein 2	0.0408163	0.00806452	0	0
A_16_P36785330	4	chr4_q21.1	77087270	77087329	USO1	USO1 homolog, vesicle docking protein (yeast)	0.0408163	0.00806452	0	0
A_16_P01003307	4	chr4_q21.1	77142815	77142874	PPEF2	protein phosphatase, EF-hand calcium binding domain 2	0.0408163	0.016129	0	0
A_16_P01003367	4	chr4_q21.1	77194131	77194190	M92449	---	0.0204082	0.016129	0	0
A_16_P16732488	4	chr4_q21.1	77209615	77209674	ASAHL	N-acylsphingosine amidohydrolase (acid ceramidase)-like	0.0204082	0.016129	0	0
A_16_P16732607	4	chr4_q21.1	77258449	77258508	SDAD1	SDA1 domain containing 1	0.0204082	0.00806452	0	0
A_14_P113044	4	chr4_q21.1	77268671	77268730	CR749574	Homo sapiens, clone IMAGE:5221301, mRNA	0.0204082	0.00806452	0	0
A_16_P16732629	4	chr4_q21.1	77273784	77273843	BC043569	Homo sapiens, clone IMAGE:5221301, mRNA	0.0204082	0.00806452	0	0
A_16_P36785829	4	chr4_q21.1	77285796	77285855	CXCL9	Homo sapiens, clone IMAGE:5221301, mRNA	0.0204082	0.00806452	0	0
A_14_P111209	4	chr4_q21.1	77388228	77388287	ART3	ADP-ribosyltransferase 3	0.0204082	0.00806452	0	0
A_16_P01003636	4	chr4_q21.1	77402996	77403055	NUP54	nucleoporin 54kDa	0.0204082	0.00806452	0	0
A_14_P122376	4	chr4_q21.1	77482317	77482376	SCARB2	scavenger receptor class B, member 2	0.0204082	0	0	0
A_16_P16733214	4	chr4_q21.1	77535085	77535144	AK124936		0.0204082	0.00806452	0	0
A_16_P16733219	4	chr4_q21.1	77542188	77542247	STBD1	Starch binding domain 1	0.0204082	0.00806452	0	0
A_16_P01003842	4	chr4_q21.1	77577931	77577990	AK092277		0.0204082	0.00806452	0	0
A_14_P115511	4	chr4_q21.1	77681557	77681616	FLJ25770		0.0204082	0.00806452	0	0
A_14_P116811	4	chr4_q21.1	77997038	77997097	SHRM		0.0204082	0.00806452	0	0
A_14_P104381	4	chr4_q21.1	78057498	78057557	SHROOM3	shroom family member 3	0.0204082	0.00806452	0	0
A_16_P01004665	4	chr4_q21.1	78151864	78151923	AK097800		0.0204082	0.00806452	0	0
A_16_P16734714	4	chr4_q21.1	78159650	78159709	LOC728186	similar to MAP/microtubule affinity-regulating kinase 3	0.0204082	0.00806452	0	0
A_16_P01004932	4	chr4_q21.1	78313559	78313618	40787	septin 11	0.0204082	0.00806452	0	0
A_16_P16735256	4	chr4_q21.1	78352541	78352600	CCNI	Cyclin I	0.0204082	0.00806452	0	0
A_16_P16735411	4	chr4_q21.1	78425731	78425790	BC006366		0.0204082	0.00806452	0	0
A_16_P16735506	4	chr4_q21.1	78461457	78461516	CCNG2	cyclin G2	0.0204082	0.00806452	0	0
A_16_P01005691	4	chr4_q21.1	78889324	78889383	CXCL13	chemokine (C-X-C motif) ligand 13 (B-cell chemoattractant)	0.0204082	0	0	0
A_16_P01005871	4	chr4_q21.1	79023177	79023236	CNOT6L	CCR4-NOT transcription complex, subunit 6-like	0.0204082	0	0	0
A_16_P01010053	4	chr4_q21.21	81937010	81937069	MGC35043		0.0204082	0	0	0
A_14_P122108	4	chr4_q21.22	84353989	84354048	COPS4	COP9 constitutive photomorphogenic homolog subunit 4 (Arabidopsis)	0.0204082	0	0	0
A_14_P102082	4	chr4_q21.22	84385168	84385227	PLAC8	placenta-specific 8	0.0204082	0	0	0
A_16_P16756365	4	chr4_q21.23	87280420	87280479	ARHGAP24	Rho GTPase activating protein 24	0.0204082	0	0	0
A_16_P01017767	4	chr4_q21.23	87336995	87337054	MAPK10	mitogen-activated protein kinase 10	0.0204082	0	0	0
A_14_P111847	4	chr4_q21.3	88414924	88414983	AFF1	AF4/FMR2 family, member 1	0.0204082	0	0	0
A_16_P16759294	4	chr4_q22.1	88489320	88489379	KLHL8	kelch-like 8 (Drosophila)	0.0204082	0	0	0
A_16_P16759368	4	chr4_q22.1	88517139	88517198	AK123781		0.0204082	0	0	0
A_16_P01019576	4	chr4_q22.1	88600945	88601004	HSD17B13		0.0204082	0	0	0
A_16_P16761376	4	chr4_q22.1	89436548	89436607	ABCG2	ATP-binding cassette, sub-family G (WHITE), member 2	0.0204082	0	0	0
A_16_P16761442	4	chr4_q22.1	89487113	89487172	AB209400		0.0204082	0	0	0
A_14_P133921	4	chr4_q22.1	91231506	91231565	MMRN1	multimerin 1	0	0	0	0.00806452
A_16_P36820358	4	chr4_q22.1	91504669	91504728	AK097436	---	0	0	0	0.00806452
A_16_P16767591	4	chr4_q22.1	92060031	92060090	MGC48628	---	0	0	0	0.00806452
A_14_P105203	4	chr4_q22.1	92870124	92870183	AB051467	---	0.0204082	0	0	0.00806452
A_16_P01027157	4	chr4_q22.3	94130914	94130973	GRID2	glutamate receptor, ionotropic, delta 2	0.0408163	0	0	0.00806452
A_14_P115392	4	chr4_q22.3	95108274	95108319	ATOH1	atonal homolog 1 (Drosophila)	0	0	0	0.00806452
A_16_P16775466	4	chr4_q22.3	95478842	95478901	BC014345	Homo sapiens, clone IMAGE:3935474, mRNA	0	0	0	0.00806452
A_14_P127072	4	chr4_q22.3	95567835	95567894	SMARCAD1	SWI/SNF-related, matrix-associated actin-dependent regulator of chromatin, subfamily a, containing DEAD/H box 1	0	0	0	0.00806452
A_16_P01029332	4	chr4_q22.3	95612865	95612924	PGDS	prostaglandin D2 synthase, hematopoietic	0	0	0	0.00806452
A_14_P125063	4	chr4_q22.3	95942529	95942588	PDLIM5	PDZ and LIM domain 5	0.0204082	0	0	0.00806452
A_14_P202299	4	chr4_q22.3	97119668	97119727	PDHA2	pyruvate dehydrogenase (lipoamide) alpha 2	0.0204082	0	0	0
A_16_P36878938	4	chr4_q26	116392235	116392294	NDST4	N-deacetylase/N-sulfotransferase (heparan glucosaminyl) 4	0	0.00806452	0	0
A_16_P01060624	4	chr4_q26	118266470	118266529	BC050298		0	0.00806452	0	0
A_14_P200631	4	chr4_q26	118363008	118363067	TRAM1L1	translocation associated membrane protein 1-like 1	0	0.00806452	0	0
A_14_P101397	4	chr4_q26	119534566	119534625	NDST3	N-deacetylase/N-sulfotransferase (heparan glucosaminyl) 3	0	0.00806452	0	0
A_16_P16830682	4	chr4_q26	119555946	119556005	SNHG8	small nucleolar RNA host gene (non-protein coding) 8	0	0.00806452	0	0
A_16_P01062364	4	chr4_q26	119630567	119630626	PRSS12	protease, serine, 12 (neurotrypsin, motopsin)	0	0.00806452	0	0
A_16_P01062539	4	chr4_q26	119958548	119958607	BC035733	CDNA clone IMAGE:5729277	0	0.00806452	0	0
A_14_P109706	4	chr4_q26	119989573	119989632	KIAA1627	KIAA1627 protein	0	0.00806452	0	0
A_14_P108176	4	chr4_q26	120112485	120112544	SEC24D	SEC24 related gene family, member D (S. cerevisiae)	0	0.00806452	0	0
A_16_P16832310	4	chr4_q26	120175323	120175382	SYNPO2		0	0.00806452	0	0
A_14_P104949	4	chr4_q26	120904537	120904596	PDE5A	phosphodiesterase 5A, cGMP-specific	0	0.00806452	0	0
A_14_P129229	4	chr4_q27	121342819	121342878	MAD2L1	MAD2 mitotic arrest deficient-like 1 (yeast)	0	0.00806452	0	0
A_14_P113849	4	chr4_q27	122186286	122186338	PRDM5	PR domain containing 5	0	0.00806452	0	0
A_16_P01065793	4	chr4_q27	122315018	122315077	C4orf31	chromosome 4 open reading frame 31	0	0.00806452	0	0
A_16_P16837521	4	chr4_q27	122347855	122347914	FLJ23191		0	0.00806452	0	0
A_16_P36893193	4	chr4_q27	122442778	122442837	TNIP3	TNFAIP3 interacting protein 3	0	0.00806452	0	0
A_14_P201123	4	chr4_q27	122658828	122658879	GPR103	G protein-coupled receptor 103	0.0204082	0.00806452	0	0
A_16_P16838928	4	chr4_q27	122968101	122968160	ANXA5	annexin A5	0.0204082	0.00806452	0	0
A_14_P113083	4	chr4_q27	123037815	123037874	TMEM155	transmembrane protein 155	0	0.00806452	0	0
A_14_P103714	4	chr4_q27	123095124	123095183	EXOSC9	exosome component 9	0	0.00806452	0	0
A_14_P112948	4	chr4_q27	123099462	123099521	CCNA2	cyclin A2	0	0.00806452	0	0
A_14_P100224	4	chr4_q27	123149033	123149088	BBS7	Bardet-Biedl syndrome 7	0	0.00806452	0	0
A_14_P129979	4	chr4_q27	123211804	123211863	TRPC3	transient receptor potential cation channel, subfamily C, member 3	0	0.00806452	0	0
A_16_P36895716	4	chr4_q27	123473550	123473609	DQ335469		0	0.00806452	0	0
A_16_P01067538	4	chr4_q27	123499201	123499260	KIAA1109	KIAA1109	0	0.00806452	0	0
A_16_P01067816	4	chr4_q27	123658802	123658861	ADAD1	Adenosine deaminase domain containing 1 (testis-specific)	0	0.00806452	0	0
A_16_P01067833	4	chr4_q27	123675031	123675090	Tenr		0	0.00806452	0	0
A_16_P16840871	4	chr4_q27	123735364	123735423	IL2	interleukin 2	0	0.00806452	0	0
A_14_P202449	4	chr4_q27	123896837	123896896	IL21	interleukin 21	0	0.00806452	0	0
A_16_P01068157	4	chr4_q27	123958192	123958251	BC045668		0	0.00806452	0	0
A_14_P112682	4	chr4_q27	124022188	124022247	BBS12	Bardet-Biedl syndrome 12	0	0.00806452	0	0
A_14_P108631	4	chr4_q27	124176403	124176459	FGF2	fibroblast growth factor 2 (basic)	0	0.00806452	0	0
A_14_P200657	4	chr4_q27	124196222	124196281	NUDT6	nudix (nucleoside diphosphate linked moiety X)-type motif 6	0	0.00806452	0	0
A_14_P113974	4	chr4_q27	124592990	124593049	SPATA5	spermatogenesis associated 5	0	0.00806452	0	0
A_16_P36898567	4	chr4_q28.1	124674096	124674155	LOC729345	hypothetical protein LOC729345	0.0204082	0.00806452	0	0
A_16_P16842947	4	chr4_q28.1	124681788	124681847	SPRY1	sprouty homolog 1, antagonist of FGF signaling (Drosophila)	0.0204082	0.00806452	0	0
A_14_P113066	4	chr4_q28.1	124934208	124934267	AL833449	---	0	0.00806452	0	0
A_16_P16844046	4	chr4_q28.1	125137928	125137987	LOC285419	hypothetical protein LOC285419	0	0.00806452	0	0
A_16_P16845662	4	chr4_q28.1	125836824	125836883	AK057455		0	0.00806452	0	0
A_16_P16846024	4	chr4_q28.1	125989261	125989320	ANKRD50	ankyrin repeat domain 50	0	0.00806452	0	0
A_14_P201644	4	chr4_q28.1	126771504	126771563	FAT4		0	0.00806452	0	0
A_16_P16853032	4	chr4_q28.1	128995088	128995147	INTU	inturned planar cell polarity effector homolog (Drosophila)	0	0.00806452	0	0
A_14_P106358	4	chr4_q28.1	129052143	129052202	SLC25A31	solute carrier family 25 (mitochondrial carrier; adenine nucleotide translocator), member 31	0	0.00806452	0	0
A_16_P01075426	4	chr4_q28.1	129102255	129102314	HSPA4L	heat shock 70kDa protein 4-like	0	0.00806452	0	0
A_14_P134473	4	chr4_q28.1	129175634	129175693	PLK4	polo-like kinase 4 (Drosophila)	0	0.00806452	0	0
A_16_P36909190	4	chr4_q28.1	129196699	129196758	MFSD8	Major facilitator superfamily domain containing 8	0	0.00806452	0	0
A_16_P01075559	4	chr4_q28.2	129229114	129229173	MGC33302		0	0.00806452	0	0
A_14_P118871	4	chr4_q28.2	129307210	129307269	C4orf29	chromosome 4 open reading frame 29	0	0.00806452	0	0
A_16_P16854030	4	chr4_q28.2	129500996	129501052	LARP2	La ribonucleoprotein domain family, member 2	0	0.00806452	0	0
A_14_P125372	4	chr4_q28.2	129562901	129562960	PGRMC2	progesterone receptor membrane component 2	0	0.00806452	0	0
A_16_P16854282	4	chr4_q28.2	129616564	129616623	AK127906		0	0.00806452	0	0
A_16_P16854635	4	chr4_q28.2	129795598	129795657	AK093416		0	0.00806452	0	0
A_14_P112876	4	chr4_q28.2	130151331	130151390	PHF17		0	0.00806452	0	0
A_14_P123576	4	chr4_q28.2	130163095	130163154	SCLT1	sodium channel and clathrin linker 1	0	0.00806452	0	0
A_16_P36911673	4	chr4_q28.2	130297082	130297141	FLJ30655		0	0.00806452	0	0
A_16_P36911830	4	chr4_q28.2	130390376	130390435	C4orf33	chromosome 4 open reading frame 33	0	0.00806452	0	0
A_16_P16857537	4	chr4_q28.2	131048323	131048382	BC035172	CDNA clone IMAGE:5265890	0	0.00806452	0	0
A_16_P36913901	4	chr4_q28.2	131233612	131233671	BC041448	CDNA clone IMAGE:5170949	0	0.00806452	0	0
A_16_P16862134	4	chr4_q28.3	133175254	133175313	BC041865		0	0.00806452	0	0
A_14_P114872	4	chr4_q28.3	134426568	134426627	BC040219	CDNA clone IMAGE:4818734	0	0.00806452	0	0
A_14_P139817	4	chr4_q28.3	134468978	134469037	PCDH10	protocadherin 10	0	0.00806452	0	0
A_16_P16867019	4	chr4_q28.3	135475848	135475907	LOC132430	similar to poly(A) binding protein, cytoplasmic 4 (inducible form)	0	0.00806452	0	0
A_14_P137932	4	chr4_q28.3	135594475	135594534	BC032916	CDNA clone IMAGE:5266053	0	0.00806452	0	0
A_16_P36924019	4	chr4_q28.3	135942140	135942199	U92816		0	0.00806452	0	0
A_16_P01087858	4	chr4_q28.3	138809283	138809342	PCDH18	protocadherin 18	0	0.00806452	0	0
A_16_P01088720	4	chr4_q28.3	139402449	139402508	LOC641365	hypothetical protein LOC641365	0	0.00806452	0	0
A_16_P36932144	4	chr4_q28.3	139449923	139449982	LOC641364	hypothetical protein LOC641364	0	0.00806452	0	0
A_14_P200959	4	chr4_q28.3	139520863	139520921	SLC7A11	solute carrier family 7, (cationic amino acid transporter, y+ system) member 11	0	0.00806452	0	0
A_14_P112555	4	chr4_q31.1	140322124	140322168	CCRN4L	CCR4 carbon catabolite repression 4-like (S. cerevisiae)	0	0.00806452	0	0
A_14_P115296	4	chr4_q31.1	140403933	140403991	ELF2	E74-like factor 2 (ets domain transcription factor)	0	0.00806452	0	0
A_16_P16878571	4	chr4_q31.1	140454440	140454499	CR620999	CDNA FLJ36355 fis, clone THYMU2007384	0	0.00806452	0	0
A_16_P01090386	4	chr4_q31.1	140557565	140557624	OSAP	ovary-specific acidic protein	0	0.00806452	0	0
A_16_P01090422	4	chr4_q31.1	140579578	140579637	NDUFC1	NADH dehydrogenase (ubiquinone) 1, subcomplex unknown, 1, 6kDa	0	0.00806452	0	0
A_16_P36935212	4	chr4_q31.1	140696948	140697007	NARG1	NMDA receptor regulated 1	0	0.00806452	0	0
A_16_P36935281	4	chr4_q31.1	140752071	140752130	RAB33B	RAB33B, member RAS oncogene family	0	0.00806452	0	0
A_16_P16879400	4	chr4_q31.1	140832170	140832229	SETD7	SET domain containing (lysine methyltransferase) 7	0	0.00806452	0	0
A_14_P108069	4	chr4_q31.1	140982969	140983028	MGST2	microsomal glutathione S-transferase 2	0	0.00806452	0	0
A_14_P103495	4	chr4_q31.1	141432414	141432473	MAML3	mastermind-like 3 (Drosophila)	0	0.00806452	0	0
A_16_P36937736	4	chr4_q31.1	141660478	141660537	SCOC		0	0.00806452	0	0
A_16_P36937863	4	chr4_q31.1	141699448	141699507	CLGN	calmegin	0	0.00806452	0	0
A_16_P01092243	4	chr4_q31.1	141776026	141776085	LOC152586	similar to RIKEN cDNA 4933434I20	0	0.00806452	0	0
A_14_P101428	4	chr4_q31.21	141828992	141829051	ELMOD2	ELMO/CED-12 domain containing 2	0	0.00806452	0	0
A_16_P01092350	4	chr4_q31.21	141845999	141846057	UCP1	uncoupling protein 1 (mitochondrial, proton carrier)	0	0.00806452	0	0
A_16_P16882516	4	chr4_q31.21	142032360	142032419	TBC1D9	TBC1 domain family, member 9 (with GRAM domain)	0	0.00806452	0	0
A_16_P36939145	4	chr4_q31.21	142217915	142217974	RNF150	ring finger protein 150	0	0.00806452	0	0
A_14_P112437	4	chr4_q31.22	148221382	148221438	TTC29	tetratricopeptide repeat domain 29	0.0204082	0	0	0
A_16_P36954466	4	chr4_q31.22	148821939	148821998	EDNRA	endothelin receptor type A	0.0204082	0	0	0
A_14_P121855	4	chr4_q31.23	148870229	148870288	CR624983		0.0204082	0	0	0
A_14_P107869	4	chr4_q31.23	148913174	148913233	TMEM34	transmembrane protein 34	0.0204082	0	0	0
A_14_P127868	4	chr4_q31.23	148959055	148959114	LOC90826	hypothetical protein BC004337	0.0204082	0	0	0
A_16_P01102350	4	chr4_q31.23	149351075	149351134	ARHGAP10		0.0204082	0.00806452	0	0
A_16_P36956161	4	chr4_q31.23	149473271	149473330	NR3C2	nuclear receptor subfamily 3, group C, member 2	0.0204082	0.00806452	0	0
A_16_P16902224	4	chr4_q31.23	150530861	150530920	BC040325	CDNA clone IMAGE:4837517	0	0.00806452	0	0
A_16_P36960012	4	chr4_q31.23	151092695	151092754	LOC285423	hypothetical gene supported by BC031092	0	0.00806452	0	0
A_16_P01105368	4	chr4_q31.23	151476735	151476794	DCAMKL2		0	0.00806452	0	0
A_16_P01105386	4	chr4_q31.23	151484775	151484834	DCLK2	Doublecortin-like kinase 2	0	0.00806452	0	0
A_16_P36962943	4	chr4_q31.23	152293179	152293238	LRBA	LPS-responsive vesicle trafficking, beach and anchor containing	0	0.00806452	0	0
A_14_P201526	4	chr4_q31.3	152382886	152382945	RPS3A	ribosomal protein S3A	0	0.00806452	0	0
A_16_P36963415	4	chr4_q31.3	152504928	152504987	SH3D19	SH3 domain protein D19	0	0.00806452	0	0
A_16_P01106914	4	chr4_q31.3	152569997	152570056	ESSPL		0	0.00806452	0	0
A_16_P16907433	4	chr4_q31.3	152824013	152824072	AK125363		0	0.00806452	0	0
A_16_P16907741	4	chr4_q31.3	152934398	152934457	LOC729830	similar to CG3558-PA, isoform A	0	0.00806452	0	0
A_16_P36964749	4	chr4_q31.3	153037665	153037724	PET112L	PET112-like (yeast)	0	0.00806452	0	0
A_16_P36965263	4	chr4_q31.3	153235413	153235472	BC035179	CDNA clone IMAGE:5266192	0	0.00806452	0	0
A_16_P36966773	4	chr4_q31.3	153803686	153803745	FBXW7	F-box and WD repeat domain containing 7	0	0.00806452	0	0
A_14_P138148	4	chr4_q31.3	153816592	153816651	DKFZP434I0714	hypothetical protein DKFZP434I0714	0	0.00806452	0	0
A_16_P16910287	4	chr4_q31.3	153898083	153898142	TMEM154	transmembrane protein 154	0	0.00806452	0	0
A_14_P107192	4	chr4_q31.3	153956579	153956638	FLJ32028		0	0.00806452	0	0
A_16_P16910630	4	chr4_q31.3	154040122	154040181	TIGD4	tigger transposable element derived 4	0	0.00806452	0	0
A_16_P36968421	4	chr4_q31.3	154465188	154465247	BC011052		0	0.00806452	0	0
A_14_P136642	4	chr4_q31.3	154617666	154617725	TRIM2	tripartite motif-containing 2	0	0.00806452	0	0
A_14_P123165	4	chr4_q31.3	154692905	154692964	MND1	meiotic nuclear divisions 1 homolog (S. cerevisiae)	0	0.00806452	0	0
A_14_P105410	4	chr4_q31.3	154915291	154915350	KIAA0922		0	0.00806452	0	0
A_16_P16912906	4	chr4_q31.3	154957907	154957966	BC032464		0	0.00806452	0	0
A_14_P200129	4	chr4_q31.3	154984004	154984062	TLR2		0	0.00806452	0	0
A_16_P36969913	4	chr4_q31.3	155030598	155030657	RNF175	ring finger protein 175	0	0.00806452	0	0
A_16_P01110707	4	chr4_q31.3	155064602	155064661	SFRP2	secreted frizzled-related protein 2	0	0.00806452	0	0
A_16_P36971726	4	chr4_q31.3	155767287	155767346	DCHS2	dachsous 2 (Drosophila)	0	0.00806452	0	0
A_16_P16915026	4	chr4_q31.3	155824551	155824610	PLRG1	pleiotropic regulator 1 (PRL1 homolog, Arabidopsis)	0	0.00806452	0	0
A_14_P100691	4	chr4_q31.3	155848395	155848448	FGB	fibrinogen beta chain	0	0.00806452	0	0
A_16_P01111932	4	chr4_q31.3	155867567	155867626	FGA	fibrinogen alpha chain	0	0.00806452	0	0
A_16_P36972144	4	chr4_q31.3	155890523	155890582	FGG	fibrinogen gamma chain	0	0.00806452	0	0
A_16_P16915468	4	chr4_q32.1	155977432	155977491	AK056234		0	0.00806452	0	0
A_16_P16915537	4	chr4_q32.1	156004209	156004268	DQ266889		0	0.00806452	0	0
A_14_P100245	4	chr4_q32.1	156028557	156028616	LRAT	lecithin retinol acyltransferase (phosphatidylcholine--retinol O-acyltransferase)	0	0.00806452	0	0
A_14_P130943	4	chr4_q32.1	156084846	156084905	MGC27016		0	0.00806452	0	0
A_14_P120565	4	chr4_q32.1	156106704	156106763	RBM46	RNA binding motif protein 46	0	0.00806452	0	0
A_14_P113340	4	chr4_q32.1	156488624	156488683	NPY2R	neuropeptide Y receptor Y2	0	0.00806452	0	0
A_14_P129045	4	chr4_q32.1	156651963	156652022	MAP9	microtubule-associated protein 9	0	0.00806452	0	0
A_16_P01113583	4	chr4_q32.1	157008965	157009024	GUCY1A3		0	0.00806452	0	0
A_16_P01113596	4	chr4_q32.1	157014360	157014419	AK124244	CDNA clone IMAGE:5302158	0	0.00806452	0	0
A_16_P01113716	4	chr4_q32.1	157083843	157083902	GUCY1B3	guanylate cyclase 1, soluble, beta 3	0	0.00806452	0	0
A_16_P01113817	4	chr4_q32.1	157144955	157145014	ACCN5	amiloride-sensitive cation channel 5, intestinal	0	0.00806452	0	0
A_14_P117363	4	chr4_q32.1	157198602	157198661	TDO2	tryptophan 2,3-dioxygenase	0	0.00806452	0	0
A_14_P108318	4	chr4_q32.1	157228097	157228156	CTSO	cathepsin O	0	0.00806452	0	0
A_16_P01115500	4	chr4_q32.1	158246876	158246935	PDGFC	platelet derived growth factor C	0	0.00806452	0	0.00806452
A_16_P16921570	4	chr4_q32.1	158449402	158449461	GLRB	glycine receptor, beta	0	0.00806452	0	0.00806452
A_16_P16922100	4	chr4_q32.1	158638576	158638635	GRIA2	glutamate receptor, ionotropic, AMPA 2	0	0.00806452	0	0.00806452
A_16_P36979605	4	chr4_q32.1	158840182	158840241	LOC340017	hypothetical protein LOC340017	0	0.00806452	0	0.00806452
A_14_P133021	4	chr4_q32.1	159448985	159449039	C4orf18	chromosome 4 open reading frame 18	0	0	0	0.00806452
A_16_P01117289	4	chr4_q32.1	159476313	159476372	AK096792		0	0	0	0.00806452
A_14_P105479	4	chr4_q32.1	159533411	159533470	TMEM144	transmembrane protein 144	0	0	0	0.00806452
A_16_P16924694	4	chr4_q32.1	159788079	159788138	AK122647		0	0	0	0.00806452
A_16_P36982189	4	chr4_q32.1	159923872	159923931	RXFP1	relaxin/insulin-like family peptide receptor 1	0	0	0	0.00806452
A_16_P36982231	4	chr4_q32.1	159947569	159947628	LOC201725	hypothetical protein LOC201725	0	0	0	0.00806452
A_16_P36982332	4	chr4_q32.1	159984914	159984973	ETFDH	electron-transferring-flavoprotein dehydrogenase	0	0	0	0.00806452
A_14_P201604	4	chr4_q32.1	160000204	160000263	PPID	peptidylprolyl isomerase D (cyclophilin D)	0	0	0	0.00806452
A_16_P16925697	4	chr4_q32.1	160184368	160184427	KIAA1450	KIAA1450 protein	0	0	0	0.00806452
A_14_P127497	4	chr4_q32.1	160313798	160313855	FLJ25371	hypothetical protein FLJ25371	0	0	0	0.00806452
A_14_P125552	4	chr4_q32.1	160637238	160637297	RAPGEF2	Rap guanine nucleotide exchange factor (GEF) 2	0	0	0	0.00806452
A_16_P16937882	4	chr4_q32.3	165465610	165465669	AL713759		0.0204082	0	0	0.00806452
A_16_P16937900	4	chr4_q32.3	165471151	165471210	ANP32C	acidic (leucine-rich) nuclear phosphoprotein 32 family, member C	0.0204082	0	0	0.00806452
A_16_P16956857	4	chr4_q34.1	173804227	173804286	GALNT17	polypeptide N-acetylgalactosaminyltransferase 17	0.0204082	0	0	0.00806452
A_14_P113363	4	chr4_q34.1	174628472	174628531	HMGB2	high-mobility group box 2	0	0	0.0204082	0
A_16_P16958965	4	chr4_q34.1	174665269	174665328	AK091103	CDNA FLJ33784 fis, clone BRSSN2007819	0	0	0.0204082	0
A_16_P16958981	4	chr4_q34.1	174669904	174669963	SAP30	Sin3A-associated protein, 30kDa	0	0	0.0204082	0
A_16_P01138108	4	chr4_q34.1	174695271	174695330	SCRG1	scrapie responsive protein 1	0	0	0.0204082	0
A_16_P16959063	4	chr4_q34.1	174699730	174699789	BC067829		0	0	0.0204082	0
A_16_P37052830	4	chr4_q35.2	188795152	188795211	LOC339975	hypothetical protein LOC339975	0	0	0	0.00806452
A_16_P16994971	4	chr4_q35.2	188961083	188961142	LOC731477	hypothetical protein LOC731477	0	0	0	0.00806452
A_14_P123211	4	chr4_q35.2	189300260	189300319	ZFP42	zinc finger protein 42 homolog (mouse)	0	0	0	0.00806452
A_16_P01160358	4	chr4_q35.2	189401195	189401254	TRIML2	tripartite motif family-like 2	0	0	0	0.00806452
A_14_P200768	4	chr4_q35.2	189441089	189441145	TRIML1	tripartite motif family-like 1	0	0	0	0.00806452
A_16_P01160875	4	chr4_q35.2	189770454	189770513	AY494056		0	0	0	0.00806452
A_14_P133227	4	chr4_q35.2	189833087	189833146	AK095968		0	0	0	0.00806452
A_16_P16997556	4	chr4_q35.2	190088204	190088263	BC033535	CDNA clone IMAGE:4822119	0	0	0	0.00806452
A_16_P17000173	4	chr4_q35.2	191165971	191166030	BC087857		0	0	0	0.00806452
A_16_P37060192	5	chr5_p15.33	517472	517531	EXOC3	exocyst complex component 3	0	0	0	0.00806452
A_16_P01163332	5	chr5_p15.33	523562	523621	LOC25845	hypothetical LOC25845	0	0	0	0.00806452
A_16_P17001985	5	chr5_p15.33	574662	574716	SLC9A3	solute carrier family 9 (sodium/hydrogen exchanger), member 3	0	0	0	0.00806452
A_14_P133290	5	chr5_p15.33	654179	654228	AF251188		0	0	0	0.00806452
A_16_P37060816	5	chr5_p15.33	706486	706545	CEP72	centrosomal protein 72kDa	0	0	0	0.00806452
A_16_P01163655	5	chr5_p15.33	745859	745903	TPPP	tubulin polymerization promoting protein	0	0.00806452	0	0.016129
A_16_P17002676	5	chr5_p15.33	826044	826103	AK096220		0.0408163	0.016129	0.0204082	0.0241935
A_16_P37061177	5	chr5_p15.33	837253	837297	ZDHHC11	zinc finger, DHHC-type containing 11	0.0204082	0.016129	0.0204082	0.0241935
A_14_P102127	5	chr5_p15.33	942958	943017	BRD9	bromodomain containing 9	0	0	0	0.00806452
A_14_P110021	5	chr5_p15.33	967655	967714	TRIP13	thyroid hormone receptor interactor 13	0	0	0	0.00806452
A_16_P37061744	5	chr5_p15.33	1045953	1046012	AK126199		0	0	0	0.00806452
A_16_P01163984	5	chr5_p15.33	1082355	1082414	NKD2	naked cuticle homolog 2 (Drosophila)	0	0	0	0.00806452
A_14_P106148	5	chr5_p15.33	1163603	1163662	SLC12A7	solute carrier family 12 (potassium/chloride transporters), member 7	0	0	0.0204082	0.016129
A_16_P01164299	5	chr5_p15.33	1274266	1274313	SLC6A19		0	0	0	0.00806452
A_16_P01164305	5	chr5_p15.33	1277470	1277529	AK091954	---	0	0	0	0.00806452
A_14_P131759	5	chr5_p15.33	1291150	1291200	SLC6A18		0	0	0	0.00806452
A_14_P122335	5	chr5_p15.33	1345928	1345983	TERT	telomerase reverse transcriptase	0	0	0	0.00806452
A_16_P01164489	5	chr5_p15.33	1394252	1394311	CLPTM1L	CLPTM1-like	0	0	0	0.00806452
A_16_P01164520	5	chr5_p15.33	1427703	1427762	BC034612		0	0	0	0.00806452
A_14_P122966	5	chr5_p15.33	1492791	1492850	SLC6A3	solute carrier family 6 (neurotransmitter transporter, dopamine), member 3	0	0	0	0.00806452
A_14_P136699	5	chr5_p15.33	1536518	1536572	LPCAT1	lysophosphatidylcholine acyltransferase 1	0	0	0	0.00806452
A_14_P201285	5	chr5_p15.33	1570160	1570219	AYTL2		0	0	0	0.00806452
A_16_P17004939	5	chr5_p15.33	1643202	1643252	LOC728613	programmed cell death 6 pseudogene	0	0	0	0.00806452
A_16_P01164858	5	chr5_p15.33	1653937	1653996	BC045555		0	0	0	0.00806452
A_14_P115769	5	chr5_p15.33	1852098	1852145	MRPL36	mitochondrial ribosomal protein L36	0	0	0	0.00806452
A_14_P106313	5	chr5_p15.33	1868930	1868989	NDUFS6	NADH dehydrogenase (ubiquinone) Fe-S protein 6, 13kDa (NADH-coenzyme Q reductase)	0	0	0.0204082	0.00806452
A_14_P200945	5	chr5_p15.33	1932405	1932462	IRX4	iroquois homeobox 4	0	0	0.0204082	0.00806452
A_16_P37064454	5	chr5_p15.33	1951683	1951742	BC039383	CDNA clone IMAGE:5271913	0	0	0	0.00806452
A_16_P17038245	5	chr5_p15.2	14562053	14562112	TRIO	triple functional domain (PTPRF interacting)	0	0.00806452	0	0
A_16_P01184374	5	chr5_p15.2	14660515	14660574	FAM105A	family with sequence similarity 105, member A	0	0.00806452	0	0
A_16_P17038481	5	chr5_p15.2	14668798	14668857	AF052146	CDNA FLJ43660 fis, clone SYNOV4004823	0	0.00806452	0	0
A_14_P127695	5	chr5_p15.2	14738324	14738383	FAM105B	family with sequence similarity 105, member B	0	0.00806452	0	0
A_16_P17063768	5	chr5_p14.1	25356454	25356513	BC036004	Homo sapiens, clone IMAGE:4730399, mRNA	0	0.00806452	0	0.00806452
A_14_P104852	5	chr5_p14.1	27070123	27070182	CDH9	cadherin 9, type 2 (T1-cadherin)	0	0.00806452	0	0
A_16_P17068533	5	chr5_p14.1	27521424	27521483	LOC643401	hypothetical protein LOC643401	0	0.00806452	0	0
A_16_P17104653	5	chr5_p12	43316545	43316604	MGC42105		0.0204082	0.00806452	0	0
A_14_P127423	5	chr5_p12	43343525	43343584	HMGCS1	3-hydroxy-3-methylglutaryl-Coenzyme A synthase 1 (soluble)	0.0204082	0.00806452	0	0
A_14_P137309	5	chr5_p12	43447211	43447270	CCL28	chemokine (C-C motif) ligand 28	0.0204082	0.00806452	0	0
A_14_P101262	5	chr5_p12	43515731	43515790	C5orf28	chromosome 5 open reading frame 28	0.0204082	0.00806452	0	0
A_16_P37165267	5	chr5_p12	43522837	43522896	C5orf34	chromosome 5 open reading frame 34	0.0204082	0.00806452	0	0
A_16_P01222872	5	chr5_p12	43548160	43548219	FLJ32363		0.0204082	0.00806452	0	0
A_14_P124294	5	chr5_p12	43591936	43591995	PAIP1	poly(A) binding protein interacting protein 1	0.0204082	0.00806452	0	0
A_16_P01222942	5	chr5_p12	43627324	43627383	AK096668		0.0204082	0.00806452	0	0
A_14_P137283	5	chr5_p12	43740635	43740694	NNT	nicotinamide nucleotide transhydrogenase	0.0204082	0.00806452	0	0
A_14_P201517	5	chr5_p12	44419611	44419670	FGF10	fibroblast growth factor 10	0.0204082	0	0	0
A_16_P17106897	5	chr5_p12	44444415	44444474	BC042062	Homo sapiens, clone IMAGE:5723690, mRNA	0.0204082	0	0	0
A_14_P200698	5	chr5_p12	44849004	44849062	MRPS30	mitochondrial ribosomal protein S30	0.0204082	0	0	0
A_16_P37169870	5	chr5_p12	45587848	45587907	HCN1	hyperpolarization activated cyclic nucleotide-gated potassium channel 1	0.0204082	0	0.0204082	0
A_14_P101771	5	chr5_q11.1	49725929	49725988	LOC647121	embigin homolog (mouse) pseudogene	0	0.00806452	0	0
A_16_P01226181	5	chr5_q11.1	49764926	49764985	EMB		0	0.00806452	0	0
A_16_P17111632	5	chr5_q11.1	50173851	50173910	PARP8		0	0.00806452	0	0
A_16_P17113035	5	chr5_q11.2	50706872	50706930	CR936786		0	0.016129	0	0
A_14_P200700	5	chr5_q11.2	50714334	50714382	CR604031		0	0.016129	0	0
A_14_P201897	5	chr5_q11.2	50725699	50725758	ISL1	ISL LIM homeobox 1	0	0.016129	0	0
A_16_P17118972	5	chr5_q11.2	53202739	53202798	AF130091	CDNA clone IMAGE:4820434	0	0.00806452	0	0
A_16_P37180694	5	chr5_q11.2	53636681	53636740	ARL15	ADP-ribosylation factor-like 15	0	0.00806452	0	0
A_14_P200138	5	chr5_q11.2	53787886	53787945	HSPB3	heat shock 27kDa protein 3	0	0.00806452	0	0
A_14_P108174	5	chr5_q11.2	53851151	53851200	SNAG1	sorting nexin associated golgi protein 1	0	0.00806452	0	0
A_16_P01232095	5	chr5_q11.2	53860126	53860185	BC060791		0	0.00806452	0	0
A_16_P17121489	5	chr5_q11.2	54183735	54183794	LOC727930	similar to CG10275-PA	0	0.00806452	0	0
A_14_P106467	5	chr5_q11.2	54313589	54313646	ESM1	endothelial cell-specific molecule 1	0	0.016129	0	0
A_14_P137010	5	chr5_q11.2	54362949	54363007	GZMK	granzyme K (granzyme 3; tryptase II)	0	0.016129	0	0
A_14_P106239	5	chr5_q11.2	54441692	54441750	GZMA	granzyme A (granzyme 1, cytotoxic T-lymphocyte-associated serine esterase 3)	0	0.016129	0	0
A_16_P17122288	5	chr5_q11.2	54504106	54504165	CDC20B	cell division cycle 20 homolog B (S. cerevisiae)	0	0.016129	0	0
A_14_P123229	5	chr5_q11.2	54564231	54564279	CCNO	cyclin O	0	0.016129	0	0
A_14_P116579	5	chr5_q11.2	54636411	54636470	DHX29	DEAH (Asp-Glu-Ala-His) box polypeptide 29	0	0.00806452	0	0
A_14_P100709	5	chr5_q11.2	54756424	54756483	SKIV2L2	superkiller viralicidic activity 2-like 2 (S. cerevisiae)	0	0.00806452	0	0
A_16_P37183839	5	chr5_q11.2	54863905	54863964	PPAP2A	phosphatidic acid phosphatase type 2A	0	0.00806452	0	0
A_16_P17123512	5	chr5_q11.2	55008667	55008726	FLJ90709		0	0.016129	0	0
A_14_P138185	5	chr5_q11.2	55148225	55148284	DDX4	DEAD (Asp-Glu-Ala-Asp) box polypeptide 4	0	0.00806452	0	0
A_14_P138180	5	chr5_q11.2	55248621	55248680	IL31RA	interleukin 31 receptor A	0	0.00806452	0	0
A_16_P17124094	5	chr5_q11.2	55257352	55257411	AF106913		0	0.00806452	0	0
A_16_P37184944	5	chr5_q11.2	55314983	55315042	IL6ST	Interleukin 6 signal transducer (gp130, oncostatin M receptor)	0	0.00806452	0	0
A_16_P17124274	5	chr5_q11.2	55330468	55330527	FLJ31104	Hypothetical gene supported by AK055666; BC039324	0	0.00806452	0	0
A_16_P17124538	5	chr5_q11.2	55452093	55452152	ANKRD55	ankyrin repeat domain 55	0	0.00806452	0	0
A_16_P17124777	5	chr5_q11.2	55563523	55563582	FLJ11795		0	0.00806452	0	0
A_16_P01234864	5	chr5_q11.2	55796980	55797039	AK098579		0	0.00806452	0	0
A_16_P17126558	5	chr5_q11.2	56226227	56226286	MAP3K1	mitogen-activated protein kinase kinase kinase 1	0	0.00806452	0	0
A_16_P17126613	5	chr5_q11.2	56246391	56246450	C5orf35	chromosome 5 open reading frame 35	0	0.00806452	0	0
A_16_P17126720	5	chr5_q11.2	56279527	56279586	MIER3	mesoderm induction early response 1, family member 3	0	0.00806452	0	0
A_16_P37187995	5	chr5_q11.2	56564676	56564735	GPBP1	GC-rich promoter binding protein 1	0	0.00806452	0	0
A_16_P17133783	5	chr5_q12.1	59070208	59070267	PDE4D	phosphodiesterase 4D, cAMP-specific (phosphodiesterase E3 dunce homolog, Drosophila)	0	0	0.0204082	0.00806452
A_14_P127090	5	chr5_q12.3	65510775	65510834	SFRS12	splicing factor, arginine/serine-rich 12	0	0.00806452	0	0
A_16_P17149237	5	chr5_q12.3	65902117	65902176	FLJ46010	CDNA clone IMAGE:3615211	0	0.00806452	0	0
A_16_P37211493	5	chr5_q12.3	66265854	66265913	MAST4	microtubule associated serine/threonine kinase family member 4	0	0.00806452	0	0.00806452
A_14_P132823	5	chr5_q12.3	66428552	66428611	BC018692		0	0	0	0.00806452
A_14_P201098	5	chr5_q13.2	68434643	68434702	SLC30A5	solute carrier family 30 (zinc transporter), member 5	0	0	0	0.016129
A_16_P17156435	5	chr5_q13.2	68868713	68868772	OCLN	occludin	0	0	0	0.00806452
A_16_P37218745	5	chr5_q13.2	69274433	69274492	LOC730391	hypothetical protein LOC728555	0	0	0	0.00806452
A_16_P01253504	5	chr5_q13.2	69767948	69768007	GTF2H2	general transcription factor IIH, polypeptide 2, 44kDa	0	0	0	0.0241935
A_16_P01253518	5	chr5_q13.2	70345552	70345611	NAIP	NLR family, apoptosis inhibitory protein	0	0	0	0.0322581
A_16_P17159948	5	chr5_q13.2	70422297	70422356	X83301	Transcribed locus	0	0	0	0.0322581
A_16_P37222073	5	chr5_q13.2	70693444	70693503	AB033067		0	0	0	0.0241935
A_16_P01290638	5	chr5_q15	96167040	96167099	ERAP1	endoplasmic reticulum aminopeptidase 1	0	0	0	0.00806452
A_16_P17222735	5	chr5_q15	96188510	96188569	AK094985		0	0	0	0.00806452
A_16_P37312493	5	chr5_q21.3	107741762	107741821	FBXL17	F-box and leucine-rich repeat protein 17	0	0.00806452	0	0
A_14_P135463	5	chr5_q21.3	108551078	108551137	FER	fer (fps/fes related) tyrosine kinase (phosphoprotein NCP94)	0	0.00806452	0	0
A_16_P17251181	5	chr5_q21.3	108558122	108558181	AK123847	CDNA FLJ35001 fis, clone OCBBF2011887	0	0.00806452	0	0
A_16_P17251402	5	chr5_q21.3	108681666	108681725	LOC285638	hypothetical protein LOC285638	0	0.00806452	0	0
A_16_P37314756	5	chr5_q21.3	108764130	108764189	PJA2	praja 2, RING-H2 motif containing	0	0.00806452	0	0
A_16_P37315912	5	chr5_q21.3	109230463	109230522	MAN2A1	mannosidase, alpha, class 2A, member 1	0	0.00806452	0	0
A_16_P01308958	5	chr5_q22.1	109688972	109689031	AK093222	CDNA FLJ35903 fis, clone TESTI2009585	0	0.00806452	0	0
A_16_P37317651	5	chr5_q22.1	110098308	110098367	FLJ43080	CDNA FLJ35903 fis, clone TESTI2009585	0	0.00806452	0	0
A_16_P37317737	5	chr5_q22.1	110125987	110126046	SLC25A46	solute carrier family 25, member 46	0	0.00806452	0	0
A_14_P135726	5	chr5_q22.1	110437054	110437104	TSLP	thymic stromal lymphopoietin	0	0.00806452	0	0
A_14_P110405	5	chr5_q22.1	110491287	110491345	WDR36		0	0.00806452	0	0
A_16_P37319131	5	chr5_q22.1	110745871	110745930	CAMK4	calcium/calmodulin-dependent protein kinase IV	0	0.00806452	0	0
A_16_P01311369	5	chr5_q22.2	111518826	111518885	AK096057		0	0.00806452	0	0
A_14_P200142	5	chr5_q22.2	111525339	111525392	C5orf26	chromosome 5 open reading frame 26	0	0.00806452	0	0
A_14_P107807	5	chr5_q22.2	111706365	111706424	EPB41L4A	erythrocyte membrane protein band 4.1 like 4A	0	0.00806452	0	0
A_16_P01312513	5	chr5_q22.2	112371549	112371608	DCP2		0	0.00806452	0	0
A_14_P136696	5	chr5_q22.2	112658028	112658075	MCC	mutated in colorectal cancers	0	0.00806452	0	0
A_16_P17260698	5	chr5_q22.2	112743763	112743822	BX647710		0	0.00806452	0	0
A_16_P01313223	5	chr5_q22.2	112789496	112789549	AK128596		0	0.00806452	0	0
A_14_P124213	5	chr5_q22.2	112796585	112796637	TSSK1B	testis-specific serine kinase 1B	0	0.00806452	0	0
A_14_P131432	5	chr5_q22.2	112957567	112957626	YTHDC2	YTH domain containing 2	0	0.00806452	0	0
A_14_P120300	5	chr5_q22.3	113859897	113859956	KCNN2	potassium intermediate/small conductance calcium-activated channel, subfamily N, member 2	0	0.00806452	0	0
A_16_P17263601	5	chr5_q22.3	114123441	114123500	AK097686		0	0.00806452	0	0
A_16_P17264511	5	chr5_q22.3	114622101	114622160	PGGT1B	protein geranylgeranyltransferase type I, beta subunit	0	0	0.0204082	0
A_16_P17264541	5	chr5_q22.3	114631291	114631350	CCDC112	coiled-coil domain containing 112	0	0	0.0204082	0
A_16_P01315465	5	chr5_q22.3	114652538	114652597	MGC39633		0	0	0.0204082	0
A_16_P01315591	5	chr5_q22.3	114751270	114751329	CTNNA1	catenin (cadherin-associated protein), alpha 1, 102kDa	0	0	0.0204082	0
A_16_P01315821	5	chr5_q22.3	114903018	114903077	FEM1C	fem-1 homolog c (C. elegans)	0	0	0.0204082	0
A_16_P17265371	5	chr5_q22.3	114959302	114959361	TICAM2	toll-like receptor adaptor molecule 2	0	0	0.0204082	0
A_16_P17265435	5	chr5_q22.3	114988997	114989056	TMED7	transmembrane emp24 protein transport domain containing 7	0	0	0.0204082	0
A_16_P17265812	5	chr5_q22.3	115176797	115176856	CDO1	cysteine dioxygenase, type I	0	0	0.0204082	0
A_16_P01316215	5	chr5_q22.3	115204779	115204838	ATG12	ATG12 autophagy related 12 homolog (S. cerevisiae)	0	0	0.0204082	0
A_14_P134047	5	chr5_q23.1	115233585	115233644	AP3S1	adaptor-related protein complex 3, sigma 1 subunit	0	0	0.0204082	0
A_16_P01322615	5	chr5_q23.1	119760889	119760948	BC011941		0	0	0	0.00806452
A_16_P01322681	5	chr5_q23.1	119819839	119819898	PRR16	proline rich 16	0	0	0	0.00806452
A_16_P01333278	5	chr5_q23.2	127297999	127298058	FLJ33630	hypothetical protein LOC644873	0	0	0.0204082	0
A_16_P17294705	5	chr5_q23.2	127439603	127439662	BC036629	---	0	0	0.0204082	0
A_14_P139508	5	chr5_q23.2	127548833	127548892	SLC12A2	solute carrier family 12 (sodium/potassium/chloride transporters), member 2	0	0	0.0204082	0
A_16_P37359685	5	chr5_q23.2	127868864	127868923	FBN2	fibrillin 2 (congenital contractural arachnodactyly)	0	0	0.0204082	0
A_14_P120840	5	chr5_q23.3	129100938	129100997	ADAMTS19	ADAM metallopeptidase with thrombospondin type 1 motif, 19	0	0	0.0204082	0
A_16_P37363420	5	chr5_q23.3	129543633	129543692	CSS3		0	0	0.0204082	0
A_14_P125163	5	chr5_q23.3	129549049	129549108	CHSY-2	chondroitin synthase-2	0	0	0.0204082	0
A_14_P108145	5	chr5_q23.3	130526895	130526941	HINT1	histidine triad nucleotide binding protein 1	0	0	0.0204082	0
A_14_P202223	5	chr5_q23.3	130563251	130563310	LYRM7	Lyrm7 homolog (mouse)	0	0	0.0204082	0
A_16_P37366152	5	chr5_q23.3	130996361	130996420	CDC42SE2	CDC42 small effector 2	0	0	0.0204082	0
A_14_P126980	5	chr5_q23.3	131159703	131159761	RAPGEF6	Rap guanine nucleotide exchange factor (GEF) 6	0	0	0.0204082	0
A_16_P17302927	5	chr5_q23.3	131374217	131374272	ACSL6	acyl-CoA synthetase long-chain family member 6	0	0	0.0204082	0
A_14_P110601	5	chr5_q23.3	131424391	131424450	IL3	interleukin 3 (colony-stimulating factor, multiple)	0	0	0.0204082	0
A_14_P132778	5	chr5_q23.3	131439330	131439388	CSF2	colony stimulating factor 2 (granulocyte-macrophage)	0	0	0.0204082	0
A_16_P01338687	5	chr5_q23.3	131586294	131586353	P4HA2	procollagen-proline, 2-oxoglutarate 4-dioxygenase (proline 4-hydroxylase), alpha polypeptide II	0	0	0.0204082	0
A_16_P01338722	5	chr5_q23.3	131615381	131615439	BC030525	---	0	0	0.0204082	0
A_14_P115178	5	chr5_q23.3	131636797	131636856	PDLIM4	---	0	0	0.0204082	0
A_14_P117482	5	chr5_q23.3	131704248	131704303	SLC22A4	solute carrier family 22 (organic cation transporter), member 4	0	0	0.0204082	0
A_16_P17303694	5	chr5_q23.3	131727617	131727676	BC043424	CDNA clone IMAGE:5285293	0	0	0.0204082	0
A_16_P01338918	5	chr5_q23.3	131758309	131758368	SLC22A5	solute carrier family 22 (organic cation transporter), member 5	0	0	0.0204082	0
A_16_P01339034	5	chr5_q23.3	131839536	131839595	LOC441108	hypothetical gene supported by AK128882	0	0	0.0204082	0
A_14_P105696	5	chr5_q23.3	131852967	131853024	IRF1	interferon regulatory factor 1	0	0	0.0204082	0
A_14_P120351	5	chr5_q23.3	131905941	131906000	IL5	interleukin 5 (colony-stimulating factor, eosinophil)	0	0	0.0204082	0
A_14_P111032	5	chr5_q23.3	132006392	132006451	RAD50	RAD50 homolog (S. cerevisiae)	0	0	0.0204082	0
[truncated: 7,687 more rows]
