# Supplementary material for: High-Resolution Comparative Genomic Hybridization of Inflammatory Breast Cancer and Identification of Candidate Genes
Source: PLoS One. 2011 Feb 9;6(2):e16950. doi: 10.1371/journal.pone.0016950 (PMC3037286; doi:10.1371/journal.pone.0016950)
Supplement: Table S6 — Genes with copy number gain/amplification frequencies significantly different between IBCs and nIBCs. (XLS) [file pone.0016950.s010.xls]

## Sheet: Table S6
Table S6 : Genes with copy number gain/amplification frequencies significantly different between IBCs and nIBCs
							Gain frequencies			Amplification frequencies
Probe name	Start	Stop	Symbol	Name	ChrName	Cytoband	IBC	nIBC	p-value (Fisher exact test)	IBC	nIBC	p-value (Fisher exact test)	Associated with
A_14_P127531	115574175	115574234	NGFB	nerve growth factor, beta polypeptide	1	1p13.1	0.0816327	0.00806452	0.0231317	0	0	1	IBC
A_14_P120324	154335245	154335304	FCRL5	Fc receptor-like 5	1	1q23.1	0.163265	0.145161	0.814475	0.0816327	0.00806452	0.0231317	IBC
A_14_P123209	157153399	157153458	NHLH1	nescient helix loop helix 1	1	1q23.2	0.142857	0.177419	0.657477	0.0816327	0.00806452	0.0231317	IBC
A_16_P35329224	157210261	157210320	VANGL2	vang-like 2 (van gogh, Drosophila)	1	1q23.2	0.142857	0.177419	0.657477	0.0816327	0.00806452	0.0231317	IBC
A_14_P138911	157300891	157300950	SLAMF6	SLAM family member 6	1	1q23.3	0.142857	0.177419	0.657477	0.0816327	0.00806452	0.0231317	IBC
A_14_P138687	157361836	157361895	CD84	CD84 molecule	1	1q23.3	0.142857	0.177419	0.657477	0.0816327	0.00806452	0.0231317	IBC
A_14_P137324	157429972	157430031	SLAMF1	signaling lymphocytic activation molecule family member 1	1	1q23.3	0.142857	0.177419	0.657477	0.0816327	0.00806452	0.0231317	IBC
A_16_P35329769	157469290	157469349	CD48	CD48 molecule	1	1q23.3	0.163265	0.177419	1	0.0816327	0.00806452	0.0231317	IBC
A_16_P00177757	158838649	158838708	FCRLA	Fc receptor-like A	1	1q23.3	0.183673	0.169355	0.825984	0.0816327	0.00806452	0.0231317	IBC
A_14_P127720	159069522	159069581	NOS1AP	nitric oxide synthase 1 (neuronal) adaptor protein	1	1q23.3	0.163265	0.169355	1	0.0816327	0.00806452	0.0231317	IBC
A_14_P138496	159077369	159077428	C1orf111	chromosome 1 open reading frame 111	1	1q23.3	0.163265	0.169355	1	0.0816327	0.00806452	0.0231317	IBC
A_16_P15319155	159083076	159083135	FLJ13137	hypothetical gene supported by AK125122	1	1q23.3	0.163265	0.169355	1	0.0816327	0.00806452	0.0231317	IBC
A_14_P137647	159110162	159110221	SH2D1B	SH2 domain containing 1B	1	1q23.3	0.163265	0.169355	1	0.0816327	0.00806452	0.0231317	IBC
A_14_P109472	159224611	159224670	UHMK1	U2AF homology motif (UHM) kinase 1	1	1q23.3	0.163265	0.16129	1	0.0816327	0.00806452	0.0231317	IBC
A_16_P15319422	159229544	159229603	AL137257	Homo sapiens, Similar to likely ortholog of yeast ARV1, clone IMAGE:3460560, mRNA	1	1q23.3	0.163265	0.16129	1	0.0816327	0.00806452	0.0231317	IBC
A_16_P15319588	159289757	159289816	UAP1	UDP-N-acteylglucosamine pyrophosphorylase 1	1	1q23.3	0.163265	0.16129	1	0.0816327	0.00806452	0.0231317	IBC
A_16_P15320118	159485725	159485784	DDR2	Discoidin domain receptor family, member 2	1	1q23.3	0.163265	0.16129	1	0.0816327	0.00806452	0.0231317	IBC
A_16_P00178776	159498830	159498889	HSD17B7	hydroxysteroid (17-beta) dehydrogenase 7	1	1q23.3	0.163265	0.16129	1	0.0816327	0.00806452	0.0231317	IBC
A_16_P35335166	159569825	159569884	C1orf110		1	1q23.3	0.163265	0.16129	1	0.0816327	0.00806452	0.0231317	IBC
A_14_P119839	161547713	161547772	PBX1	pre-B-cell leukemia homeobox 1	1	1q23.3	0.163265	0.169355	1	0.0816327	0.00806452	0.0231317	IBC
A_14_P123583	162051217	162051276	LMX1A	LIM homeobox transcription factor 1, alpha	1	1q23.3	0.163265	0.169355	1	0.0816327	0.00806452	0.0231317	IBC
A_16_P00182599	162145753	162145812	RXRG	retinoid X receptor, gamma	1	1q23.3	0.163265	0.169355	1	0.0816327	0.00806452	0.0231317	IBC
A_16_P15326921	162279423	162279482	LOC400794	hypothetical gene supported by BC030596	1	1q23.3	0.163265	0.169355	1	0.0816327	0.00806452	0.0231317	IBC
A_14_P122838	162355211	162355270	MGST3	microsomal glutathione S-transferase 3	1	1q24.1	0.163265	0.169355	1	0.0816327	0.00806452	0.0231317	IBC
A_14_P115810	162396192	162396251	ALDH9A1	aldehyde dehydrogenase 9 family, member A1	1	1q24.1	0.163265	0.169355	1	0.0816327	0.00806452	0.0231317	IBC
A_16_P15327349	162459706	162459765	TMCO1	transmembrane and coiled-coil domains 1	1	1q24.1	0.163265	0.169355	1	0.0816327	0.00806452	0.0231317	IBC
A_16_P15327440	162515983	162516042	AK093302		1	1q24.1	0.163265	0.169355	1	0.0816327	0.00806452	0.0231317	IBC
A_16_P15327673	162604037	162604096	UCK2	uridine-cytidine kinase 2	1	1q24.1	0.163265	0.169355	1	0.0816327	0.00806452	0.0231317	IBC
A_16_P00183277	162610595	162610654	BX640859	CDNA FLJ31233 fis, clone KIDNE2004579	1	1q24.1	0.163265	0.169355	1	0.0816327	0.00806452	0.0231317	IBC
A_16_P15328009	162752984	162753043	AK055795	Transcribed locus	1	1q24.1	0.163265	0.169355	1	0.0816327	0.00806452	0.0231317	IBC
A_16_P00183659	162865519	162865578	FAM78B	family with sequence similarity 78, member B	1	1q24.1	0.163265	0.169355	1	0.0816327	0.00806452	0.0231317	IBC
A_16_P00237988	201691114	201691173	NFASC	neurofascin homolog (chicken)	1	1q32.1	0.163265	0.193548	0.828252	0.0612245	0	0.0217252	IBC
A_16_P15420232	201777681	201777740	CNTN2	contactin 2 (axonal)	1	1q32.1	0.163265	0.193548	0.828252	0.0612245	0	0.0217252	IBC
A_14_P110699	201820856	201820915	RBBP5	retinoblastoma binding protein 5	1	1q32.1	0.163265	0.193548	0.828252	0.0612245	0	0.0217252	IBC
A_16_P00238298	201869969	201870028	RIPK5	receptor interacting protein kinase 5	1	1q32.1	0.163265	0.193548	0.828252	0.0612245	0	0.0217252	IBC
A_16_P00238609	202056237	202056296	KLHDC8A	kelch domain containing 8A	1	1q32.1	0.163265	0.193548	0.828252	0.0612245	0	0.0217252	IBC
A_16_P00238644	202082435	202082494	LOC284576	hypothetical protein LOC284576	1	1q32.1	0.142857	0.193548	0.514024	0.0612245	0	0.0217252	IBC
A_16_P15421088	202114983	202115042	LEMD1	LEM domain containing 1	1	1q32.1	0.142857	0.193548	0.514024	0.0612245	0	0.0217252	IBC
A_16_P15421191	202146719	202146778	AK026628		1	1q32.1	0.142857	0.193548	0.514024	0.0612245	0	0.0217252	IBC
A_16_P15421237	202160431	202160490	AK095633		1	1q32.1	0.142857	0.193548	0.514024	0.0612245	0	0.0217252	IBC
A_16_P15421415	202229082	202229141	PCTK3	PCTAIRE protein kinase 3	1	1q32.1	0.142857	0.185484	0.65666	0.0612245	0	0.0217252	IBC
A_16_P15421485	202254008	202254067	LOC284578	hypothetical protein LOC284578	1	1q32.1	0.142857	0.185484	0.65666	0.0612245	0	0.0217252	IBC
A_16_P15421636	202310306	202310365	MFSD4	major facilitator superfamily domain containing 4	1	1q32.1	0.142857	0.185484	0.65666	0.0612245	0	0.0217252	IBC
A_14_P133811	202447092	202447151	NUCKS1	nuclear casein kinase and cyclin-dependent kinase substrate 1	1	1q32.1	0.142857	0.185484	0.65666	0.0612245	0	0.0217252	IBC
A_14_P118188	202470788	202470847	RAB7L1	RAB7, member RAS oncogene family-like 1	1	1q32.1	0.142857	0.185484	0.65666	0.0612245	0	0.0217252	IBC
A_16_P00239317	202513009	202513068	SLC41A1	CDNA FLJ40469 fis, clone TESTI2042473	1	1q32.1	0.142857	0.185484	0.65666	0.0612245	0	0.0217252	IBC
A_14_P137731	202528806	202528865	PM20D1	peptidase M20 domain containing 1	1	1q32.1	0.142857	0.185484	0.65666	0.0612245	0	0.0217252	IBC
A_14_P127966	202549082	202549141	FLJ32569		1	1q32.1	0.142857	0.185484	0.65666	0.0612245	0	0.0217252	IBC
A_16_P00247405	208212248	208212307	CR605189		1	1q32.3	0.22449	0.193548	0.67694	0.0612245	0	0.0217252	IBC
A_16_P15436007	208233008	208233067	NEK2	NIMA (never in mitosis gene a)-related kinase 2	1	1q32.3	0.22449	0.193548	0.67694	0.0612245	0	0.0217252	IBC
A_16_P15436037	208243279	208243338	LOC91548	hypothetical protein LOC91548	1	1q32.3	0.22449	0.193548	0.67694	0.0612245	0	0.0217252	IBC
A_14_P110503	208390826	208390885	LPGAT1	lysophosphatidylglycerol acyltransferase 1	1	1q32.3	0.22449	0.193548	0.67694	0.0612245	0	0.0217252	IBC
A_16_P15443071	211110542	211110601	PTPN14	protein tyrosine phosphatase, non-receptor type 14	1	1q41	0.244898	0.193548	0.53334	0.0612245	0	0.0217252	IBC
A_14_P129226	211215610	211215669	CENPF	centromere protein F, 350/400ka (mitosin)	1	1q41	0.244898	0.201613	0.54185	0.0612245	0	0.0217252	IBC
A_14_P129713	216607379	216607438	EPRS	glutamyl-prolyl-tRNA synthetase	1	1q41	0.244898	0.177419	0.395555	0.0612245	0	0.0217252	IBC
A_14_P108159	216651182	216651241	BPNT1	3'(2'), 5'-bisphosphate nucleotidase 1	1	1q41	0.244898	0.177419	0.395555	0.0612245	0	0.0217252	IBC
A_16_P00260330	216705468	216705527	IARS2	isoleucyl-tRNA synthetase 2, mitochondrial	1	1q41	0.22449	0.185484	0.671347	0.0612245	0	0.0217252	IBC
A_14_P126537	216710157	216710216	AK021928	Full-length cDNA clone CS0DC007YG11 of Neuroblastoma Cot 25-normalized of Homo sapiens (human)	1	1q41	0.22449	0.185484	0.671347	0.0612245	0	0.0217252	IBC
A_14_P129325	216826308	216826367	RAB3GAP2	Full-length cDNA clone CS0DC007YG11 of Neuroblastoma Cot 25-normalized of Homo sapiens (human)	1	1q41	0.204082	0.177419	0.669595	0.0612245	0	0.0217252	IBC
A_14_P100335	217223823	217223882	MARK1	MAP/microtubule affinity-regulating kinase 1	1	1q41	0.183673	0.169355	0.825984	0.0612245	0	0.0217252	IBC
A_14_P102052	185442811	185442870	LOC90113	hypothetical protein BC009862	3	3q27.1	0	0.0887097	0.0352717	0	0	1	nIBC
A_14_P113052	185445428	185445487	ALG3	asparagine-linked glycosylation 3 homolog (S. cerevisiae, alpha-1,3-mannosyltransferase)	3	3q27.1	0	0.0887097	0.0352717	0	0	1	nIBC
A_14_P111596	185456850	185456909	ECE2	endothelin converting enzyme 2	3	3q27.1	0	0.0887097	0.0352717	0	0	1	nIBC
A_14_P132012	185461240	185461299	CAMK2N2	calcium/calmodulin-dependent protein kinase II inhibitor 2	3	3q27.1	0	0.0887097	0.0352717	0	0	1	nIBC
A_16_P16758282	88092776	88092835	PTPN13	protein tyrosine phosphatase, non-receptor type 13 (APO-1/CD95 (Fas)-associated phosphatase)	4	4q21.3	0.0612245	0	0.0217252	0	0	1	IBC
A_14_P122144	88126849	88126908	SLC10A6		4	4q21.3	0.0612245	0	0.0217252	0	0	1	IBC
A_14_P200126	88166146	88166205	C4orf36	chromosome 4 open reading frame 36	4	4q21.3	0.0612245	0	0.0217252	0	0	1	IBC
A_14_P111847	88414924	88414983	AFF1	AF4/FMR2 family, member 1	4	4q22.1	0.0612245	0	0.0217252	0.0204082	0	0.283237	IBC
A_16_P16759294	88489320	88489379	KLHL8		4	4q22.1	0.0612245	0	0.0217252	0.0204082	0	0.283237	IBC
A_16_P16759368	88517139	88517198	AK123781		4	4q22.1	0.0612245	0	0.0217252	0.0204082	0	0.283237	IBC
A_16_P01019576	88600945	88601004	HSD17B13		4	4q22.1	0.0612245	0	0.0217252	0.0204082	0	0.283237	IBC
A_16_P16766867	91756290	91756349	MGC48628	---	4	4q22.1	0.0612245	0	0.0217252	0	0	1	IBC
A_14_P105203	92870124	92870183	AB051467	---	4	4q22.1	0.0612245	0	0.0217252	0.0204082	0	0.283237	IBC
A_16_P16773309	94558144	94558203	GRID2	glutamate receptor, ionotropic, delta 2	4	4q22.3	0.0612245	0	0.0217252	0	0	1	IBC
A_16_P01163714	878290	878349	ZDHHC11	zinc finger, DHHC-type containing 11	5	5p15.33	0.163265	0.0483871	0.0253985	0.0204082	0	0.283237	IBC
A_16_P01164489	1394252	1394311	CLPTM1L	CLPTM1-like	5	5p15.33	0.0816327	0.00806452	0.0231317	0	0	1	IBC
A_14_P136773	1417729	1417788	BC034612		5	5p15.33	0.0816327	0.00806452	0.0231317	0	0	1	IBC
A_16_P01411016	2846224	2846283	SERPINB9	serpin peptidase inhibitor, clade B (ovalbumin), member 9	6	6p25.2	0.0816327	0.00806452	0.0231317	0	0	1	IBC
A_14_P107435	2914748	2914807	SERPINB6		6	6p25.2	0.0816327	0	0.00587859	0	0	1	IBC
A_16_P17428089	2935482	2935541	DKFZp686I15217		6	6p25.2	0.0816327	0	0.00587859	0	0	1	IBC
A_16_P37495988	2939776	2939835	AB209779		6	6p25.2	0.0816327	0	0.00587859	0	0	1	IBC
A_16_P17428158	2964646	2964705	NQO2	NAD(P)H dehydrogenase, quinone 2	6	6p25.2	0.0816327	0	0.00587859	0	0	1	IBC
A_16_P17428173	2971558	2971617	LOC285771	hypothetical protein LOC285771	6	6p25.2	0.0816327	0	0.00587859	0	0	1	IBC
A_16_P01411190	3009645	3009704	AB208926		6	6p25.2	0.0816327	0	0.00587859	0	0	1	IBC
A_16_P17428349	3058881	3058940	RIPK1	receptor (TNFRSF)-interacting serine-threonine kinase 1	6	6p25.2	0.0816327	0	0.00587859	0	0	1	IBC
A_14_P135307	3097909	3097968	BPHL	biphenyl hydrolase-like (serine hydrolase; breast epithelial mucin-associated antigen)	6	6p25.2	0.0816327	0	0.00587859	0	0	1	IBC
A_14_P110143	3098932	3098991	TUBB2A	tubulin, beta 2A	6	6p25.2	0.0816327	0	0.00587859	0	0	1	IBC
A_16_P17428532	3134912	3134971	BC027024	Homo sapiens, clone IMAGE:4998578, mRNA	6	6p25.2	0.0816327	0	0.00587859	0	0	1	IBC
A_16_P17428656	3184190	3184249	AK096219		6	6p25.2	0.0612245	0	0.0217252	0	0	1	IBC
A_16_P01412558	3920526	3920585	LOC728344	similar to Thioredoxin-like protein 2 (PKC-interacting cousin of thioredoxin) (PKC-theta-interacting protein) (PKCq-interacting protein)	6	6p25.2	0.0816327	0.00806452	0.0231317	0.0204082	0	0.283237	IBC
A_16_P01412676	3997944	3998003	PRPF4B	PRP4 pre-mRNA processing factor 4 homolog B (yeast)	6	6p25.2	0.0816327	0.00806452	0.0231317	0.0204082	0	0.283237	IBC
A_16_P17454765	13592733	13592792	GFOD1	glucose-fructose oxidoreductase domain containing 1	6	6p23	0.102041	0.016129	0.0201062	0	0	1	IBC
A_16_P37523494	13719944	13720003	SIRT5	sirtuin (silent mating type information regulation 2 homolog) 5 (S. cerevisiae)	6	6p23	0.102041	0.016129	0.0201062	0.0204082	0	0.283237	IBC
A_14_P132288	13730095	13730154	NOL7	nucleolar protein 7, 27kDa	6	6p23	0.102041	0.016129	0.0201062	0.0204082	0	0.283237	IBC
A_14_P104382	13817922	13817981	RANBP9	RAN binding protein 9	6	6p23	0.102041	0.016129	0.0201062	0.0204082	0	0.283237	IBC
A_16_P17455415	13871786	13871845	AF329101		6	6p23	0.102041	0.016129	0.0201062	0.0204082	0.00806452	0.487431	IBC
A_16_P01427229	13921772	13921831	CCDC90A	coiled-coil domain containing 90A	6	6p23	0.102041	0.016129	0.0201062	0.0204082	0.00806452	0.487431	IBC
A_14_P200162	14086214	14086273	RNF182	ring finger protein 182	6	6p23	0.102041	0.016129	0.0201062	0.0204082	0	0.283237	IBC
A_16_P17456271	14244122	14244181	CD83	CD83 molecule	6	6p23	0.102041	0.016129	0.0201062	0	0	1	IBC
A_14_P131763	110408492	110408551	GPR6	G protein-coupled receptor 6	6	6q21	0.102041	0.016129	0.0201062	0.0408163	0.016129	0.318091	IBC
A_16_P17673577	110603661	110603720	WASF1	WAS protein family, member 1	6	6q21	0.102041	0.016129	0.0201062	0.0204082	0.016129	1	IBC
A_16_P17673728	110656738	110656797	CDC40	cell division cycle 40 homolog (S. cerevisiae)	6	6q21	0.102041	0.016129	0.0201062	0.0204082	0.016129	1	IBC
A_14_P113639	110682120	110682179	BC018059		6	6q21	0.102041	0.016129	0.0201062	0.0204082	0.016129	1	IBC
A_16_P17674085	110799199	110799258	AK127146		6	6q21	0.0816327	0.00806452	0.0231317	0.0204082	0.00806452	0.487431	IBC
A_16_P17674175	110840272	110840331	DDO	D-aspartate oxidase	6	6q21	0.0816327	0.00806452	0.0231317	0.0204082	0.00806452	0.487431	IBC
A_16_P37749453	110897730	110897789	SLC22A16		6	6q21	0.0816327	0.00806452	0.0231317	0.0204082	0.00806452	0.487431	IBC
A_16_P37900304	299068	299127	FAM20C		7	7p22.3	0.0612245	0	0.0217252	0	0	1	IBC
A_14_P135899	1263119	1263178	MICALL2	MICAL-like 2	7	7p22.3	0.0612245	0	0.0217252	0.0204082	0	0.283237	IBC
A_16_P01643503	1305484	1305543	INTS1	integrator complex subunit 1	7	7p22.3	0.0612245	0	0.0217252	0.0204082	0	0.283237	IBC
A_16_P17824091	1314395	1314454	AK093809		7	7p22.3	0.0612245	0	0.0217252	0.0204082	0	0.283237	IBC
A_14_P109334	1355742	1355801	MAFK	v-maf musculoaponeurotic fibrosarcoma oncogene homolog K (avian)	7	7p22.3	0.0816327	0	0.00587859	0.0204082	0	0.283237	IBC
A_16_P01643585	1359084	1359143	TMEM184A	transmembrane protein 184A	7	7p22.3	0.0816327	0	0.00587859	0.0204082	0	0.283237	IBC
A_14_P128145	1365944	1366003	MGC9712		7	7p22.3	0.0816327	0	0.00587859	0.0204082	0	0.283237	IBC
A_14_P107718	1380217	1380276	PSMG3	proteasome (prosome, macropain) assembly chaperone 3	7	7p22.3	0.0612245	0	0.0217252	0.0204082	0	0.283237	IBC
A_16_P01643644	1397414	1397473	KIAA1908	KIAA1908 protein	7	7p22.3	0.0612245	0	0.0217252	0.0204082	0	0.283237	IBC
A_14_P109217	2191574	2191633	EIF3B	eukaryotic translation initiation factor 3, subunit B	7	7p22.3	0.0612245	0	0.0217252	0	0	1	IBC
A_14_P111302	2246914	2246973	CHST12	carbohydrate (chondroitin 4) sulfotransferase 12	7	7p22.3	0.0612245	0	0.0217252	0	0	1	IBC
A_16_P01644792	2253754	2253813	FLJ00049	FLJ00049 protein	7	7p22.3	0.0612245	0	0.0217252	0	0	1	IBC
A_16_P01644900	2333471	2333530	LFNG	LFNG O-fucosylpeptide 3-beta-N-acetylglucosaminyltransferase	7	7p22.3	0.0816327	0	0.00587859	0	0	1	IBC
A_16_P01644934	2356645	2356704	C7orf27	chromosome 7 open reading frame 27	7	7p22.3	0.0816327	0	0.00587859	0	0	1	IBC
A_16_P17916561	39192873	39192932	POU6F2	POU class 6 homeobox 2	7	7p14.1	0.0612245	0	0.0217252	0.0204082	0	0.283237	IBC
A_16_P18269324	32993700	32993759	BC034319		8	8p12	0.0612245	0.016129	0.138465	0.0612245	0	0.0217252	IBC
A_16_P18270309	33449274	33449333	FUT10	fucosyltransferase 10 (alpha (1,3) fucosyltransferase)	8	8p12	0.0612245	0.016129	0.138465	0.0612245	0	0.0217252	IBC
A_14_P200237	33476716	33476775	RBM13	RNA binding motif protein 13	8	8p12	0.0612245	0.016129	0.138465	0.0612245	0	0.0217252	IBC
A_16_P01893995	33490000	33490059	C8orf41	chromosome 8 open reading frame 41	8	8p12	0.0612245	0.016129	0.138465	0.0612245	0	0.0217252	IBC
A_16_P18270505	33539202	33539261	RNF122	ring finger protein 122	8	8p12	0.0612245	0.016129	0.138465	0.0612245	0	0.0217252	IBC
A_14_P107155	33575247	33575306	DUSP26	dual specificity phosphatase 26 (putative)	8	8p12	0.0612245	0.016129	0.138465	0.0612245	0	0.0217252	IBC
A_16_P18275027	35520381	35520440	AY358147		8	8p12	0.0612245	0.0241935	0.353133	0.0612245	0	0.0217252	IBC
A_16_P18275776	35771003	35771062	UNC5D	Unc-5 homolog D (C. elegans)	8	8p12	0.0612245	0.0241935	0.353133	0.0612245	0	0.0217252	IBC
A_16_P18277789	36779836	36779895	BC028701		8	8p12	0.142857	0.0483871	0.05123	0.122449	0.016129	0.00697295	IBC
A_14_P134984	36865913	36865972	FKSG2	apoptosis inhibitor	8	8p12	0.163265	0.0645161	0.0757995	0.142857	0.016129	0.00230336	IBC
A_14_P111085	36912255	36912314	KCNU1	potassium channel, subfamily U, member 1	8	8p12	0.163265	0.0645161	0.0757995	0.142857	0.016129	0.00230336	IBC
A_16_P18279846	37568499	37568558	LOC157860	hypothetical protein LOC157860	8	8p12	0.22449	0.129032	0.161512	0.183673	0.0564516	0.0168273	IBC
A_16_P01899822	37669882	37669941	ZNF703	zinc finger protein 703	8	8p12	0.22449	0.129032	0.161512	0.163265	0.0564516	0.0349485	IBC
A_16_P18280218	37706374	37706433	BC031939	CDNA clone IMAGE:4827062	8	8p12	0.22449	0.129032	0.161512	0.163265	0.0564516	0.0349485	IBC
A_16_P18280299	37731956	37732015	ERLIN2	ER lipid raft associated 2	8	8p12	0.22449	0.129032	0.161512	0.163265	0.0564516	0.0349485	IBC
A_16_P38371727	37755937	37755996	PROSC	proline synthetase co-transcribed homolog (bacterial)	8	8p12	0.22449	0.129032	0.161512	0.163265	0.0564516	0.0349485	IBC
A_14_P105684	37782033	37782092	GPR124		8	8p12	0.22449	0.120968	0.100511	0.163265	0.0564516	0.0349485	IBC
A_16_P38471959	85492419	85492478	LOC138046		8	8q21.2	0.326531	0.177419	0.0417306	0.0612245	0.0725806	1	IBC
A_14_P138436	85996300	85996359	RALYL	RALY RNA binding protein-like	8	8q21.2	0.326531	0.177419	0.0417306	0.0816327	0.0806452	1	IBC
A_16_P18380234	86245684	86245743	LRRCC1	leucine rich repeat and coiled-coil domain containing 1	8	8q21.2	0.326531	0.169355	0.0381155	0.0816327	0.0645161	0.742597	IBC
A_16_P01959285	86311637	86311696	E2F5	E2F transcription factor 5, p130-binding	8	8q21.2	0.326531	0.169355	0.0381155	0.0816327	0.0645161	0.742597	IBC
A_16_P01959323	86344212	86344271	AK093753		8	8q21.2	0.326531	0.169355	0.0381155	0.0816327	0.0645161	0.742597	IBC
A_16_P38473840	86381327	86381386	CA13	carbonic anhydrase XIII	8	8q21.2	0.326531	0.169355	0.0381155	0.0816327	0.0645161	0.742597	IBC
A_16_P18380631	86422444	86422503	CA1	carbonic anhydrase I	8	8q21.2	0.326531	0.169355	0.0381155	0.0816327	0.0645161	0.742597	IBC
A_14_P137899	86547744	86547803	CA3	carbonic anhydrase III, muscle specific	8	8q21.2	0.346939	0.185484	0.0285007	0.0816327	0.0645161	0.742597	IBC
A_14_P112158	86580354	86580413	CA2	carbonic anhydrase II	8	8q21.2	0.346939	0.185484	0.0285007	0.0816327	0.0645161	0.742597	IBC
A_14_P113472	87145570	87145629	PSKH2	protein serine kinase H2	8	8q21.3	0.326531	0.177419	0.0417306	0.0816327	0.0725806	1	IBC
A_16_P38475853	87234275	87234334	ATP6V0D2	ATPase, H+ transporting, lysosomal 38kDa, V0 subunit d2	8	8q21.3	0.326531	0.177419	0.0417306	0.0816327	0.0725806	1	IBC
A_14_P118693	88954000	88954059	WDR21C	WD repeat domain 21C	8	8q21.3	0.326531	0.177419	0.0417306	0.0816327	0.0645161	0.742597	IBC
A_14_P115329	89115619	89115678	C8orf57	chromosome 8 open reading frame 57	8	8q21.3	0.326531	0.177419	0.0417306	0.0816327	0.0645161	0.742597	IBC
A_14_P100446	89408430	89408489	MMP16	matrix metallopeptidase 16 (membrane-inserted)	8	8q21.3	0.326531	0.177419	0.0417306	0.0816327	0.0645161	0.742597	IBC
A_16_P38483587	90789304	90789363	DKFZp686L14188	hypothetical gene supported by BX538329	8	8q21.3	0.326531	0.177419	0.0417306	0.0816327	0.0645161	0.742597	IBC
A_16_P18390212	90811409	90811468	CR590356		8	8q21.3	0.326531	0.177419	0.0417306	0.0816327	0.0645161	0.742597	IBC
A_14_P112304	90871710	90871769	RIPK2	receptor-interacting serine-threonine kinase 2	8	8q21.3	0.326531	0.177419	0.0417306	0.0816327	0.0645161	0.742597	IBC
A_14_P108760	91007791	91007850	OSGIN2	oxidative stress induced growth inhibitor family member 2	8	8q21.3	0.326531	0.177419	0.0417306	0.0816327	0.0645161	0.742597	IBC
A_14_P102046	91062117	91062176	NBN	nibrin	8	8q21.3	0.326531	0.177419	0.0417306	0.0816327	0.0645161	0.742597	IBC
A_16_P18390905	91126202	91126261	DECR1	2,4-dienoyl CoA reductase 1, mitochondrial	8	8q21.3	0.326531	0.177419	0.0417306	0.0816327	0.0645161	0.742597	IBC
A_14_P201036	91159798	91159857	CALB1	calbindin 1, 28kDa	8	8q21.3	0.326531	0.177419	0.0417306	0.0816327	0.0645161	0.742597	IBC
A_16_P18391010	91164788	91164847	S46006		8	8q21.3	0.326531	0.177419	0.0417306	0.0816327	0.0645161	0.742597	IBC
A_16_P18392296	91725182	91725241	TMEM64	CDNA clone IMAGE:5267453	8	8q21.3	0.346939	0.193548	0.0462788	0.102041	0.0645161	0.521966	IBC
A_16_P18392577	91872274	91872333	BC113828		8	8q21.3	0.346939	0.193548	0.0462788	0.102041	0.0645161	0.521966	IBC
A_16_P38486246	91944617	91944676	EFCBP1		8	8q21.3	0.346939	0.193548	0.0462788	0.102041	0.0725806	0.542744	IBC
A_16_P18392931	91998836	91998895	NECAB1	N-terminal EF-hand calcium binding protein 1	8	8q21.3	0.346939	0.193548	0.0462788	0.102041	0.0725806	0.542744	IBC
A_16_P18393253	92115920	92115979	TMEM55A	transmembrane protein 55A	8	8q21.3	0.367347	0.193548	0.0193918	0.102041	0.0725806	0.542744	IBC
A_14_P115302	92167806	92167865	OTUD6B	OTU domain containing 6B	8	8q21.3	0.367347	0.193548	0.0193918	0.102041	0.0645161	0.521966	IBC
A_16_P18393465	92192195	92192254	AK097393		8	8q21.3	0.367347	0.193548	0.0193918	0.102041	0.0645161	0.521966	IBC
A_16_P38486970	92198408	92198467	SLC26A7	Solute carrier family 26, member 7	8	8q21.3	0.367347	0.193548	0.0193918	0.102041	0.0645161	0.521966	IBC
A_16_P01967062	92307137	92307196	BC060784		8	8q21.3	0.367347	0.185484	0.0166458	0.102041	0.0645161	0.521966	IBC
A_16_P01968373	93176588	93176647	RUNX1T1		8	8q21.3	0.367347	0.185484	0.0166458	0.0816327	0.0645161	0.742597	IBC
A_16_P18397817	93952307	93952366	AK128161		8	8q22.1	0.367347	0.185484	0.0166458	0.0816327	0.0645161	0.742597	IBC
A_16_P18397997	94035645	94035704	LOC286144	hypothetical protein LOC286144	8	8q22.1	0.367347	0.185484	0.0166458	0.0816327	0.0645161	0.742597	IBC
A_16_P18398112	94094022	94094081	CR749421		8	8q22.1	0.367347	0.193548	0.0193918	0.0816327	0.0645161	0.742597	IBC
A_16_P18398506	94239145	94239204	BC089453		8	8q22.1	0.367347	0.193548	0.0193918	0.102041	0.0645161	0.521966	IBC
A_16_P18399351	94547583	94547642	LOC642924	hypothetical protein LOC642924	8	8q22.1	0.367347	0.201613	0.0313252	0.102041	0.0645161	0.521966	IBC
A_14_P107322	94809183	94809242	FAM92A1	family with sequence similarity 92, member A1	8	8q22.1	0.387755	0.201613	0.0190987	0.102041	0.0645161	0.521966	IBC
A_14_P105348	94821916	94821975	C8orf39	chromosome 8 open reading frame 39	8	8q22.1	0.387755	0.201613	0.0190987	0.102041	0.0645161	0.521966	IBC
A_14_P135626	94896784	94896843	TMEM67	transmembrane protein 67	8	8q22.1	0.387755	0.201613	0.0190987	0.102041	0.0645161	0.521966	IBC
A_14_P131735	95005574	95005633	PPM2C	protein phosphatase 2C, magnesium-dependent, catalytic subunit	8	8q22.1	0.387755	0.201613	0.0190987	0.102041	0.0645161	0.521966	IBC
A_14_P105341	95289877	95289936	CDH17	cadherin 17, LI cadherin (liver-intestine)	8	8q22.1	0.387755	0.201613	0.0190987	0.122449	0.0645161	0.224241	IBC
A_14_P120248	95342680	95342739	GEM	GTP binding protein overexpressed in skeletal muscle	8	8q22.1	0.387755	0.201613	0.0190987	0.122449	0.0645161	0.224241	IBC
A_16_P01971862	95554636	95554695	RAD54B	RAD54 homolog B (S. cerevisiae)	8	8q22.1	0.387755	0.201613	0.0190987	0.122449	0.0645161	0.224241	IBC
A_16_P38495594	95633595	95633654	KIAA1429	Transcribed locus	8	8q22.1	0.387755	0.201613	0.0190987	0.122449	0.0645161	0.224241	IBC
A_14_P135791	95787327	95787386	RBM35A	RNA binding motif protein 35A	8	8q22.1	0.387755	0.217742	0.0346495	0.122449	0.0645161	0.224241	IBC
A_14_P107833	95820789	95820848	LOC203107	hypothetical protein LOC203107	8	8q22.1	0.387755	0.217742	0.0346495	0.122449	0.0645161	0.224241	IBC
A_14_P119501	95872283	95872342	DPY19L4	dpy-19-like 4 (C. elegans)	8	8q22.1	0.408163	0.217742	0.0140637	0.122449	0.0645161	0.224241	IBC
A_16_P18402642	95959965	95960024	INTS8	integrator complex subunit 8	8	8q22.1	0.408163	0.209677	0.0123729	0.122449	0.0645161	0.224241	IBC
A_14_P108828	95975600	95975659	CCNE2	cyclin E2	8	8q22.1	0.408163	0.209677	0.0123729	0.122449	0.0645161	0.224241	IBC
A_16_P18402747	95997726	95997785	CR594623		8	8q22.1	0.408163	0.209677	0.0123729	0.122449	0.0645161	0.224241	IBC
A_16_P38496560	96019694	96019753	TP53INP1	tumor protein p53 inducible nuclear protein 1	8	8q22.1	0.408163	0.209677	0.0123729	0.122449	0.0645161	0.224241	IBC
A_14_P126345	96139190	96139249	C8orf38	chromosome 8 open reading frame 38	8	8q22.1	0.408163	0.201613	0.00714597	0.122449	0.0645161	0.224241	IBC
A_16_P18403106	96147949	96148008	LOC286149	hypothetical protein LOC286149	8	8q22.1	0.408163	0.201613	0.00714597	0.122449	0.0645161	0.224241	IBC
A_16_P18403319	96235525	96235584	PLEKHF2	pleckstrin homology domain containing, family F (with FYVE domain) member 2	8	8q22.1	0.408163	0.201613	0.00714597	0.122449	0.0645161	0.224241	IBC
A_16_P18403609	96341816	96341875	C8orf37		8	8q22.1	0.408163	0.209677	0.0123729	0.122449	0.0645161	0.224241	IBC
A_16_P18405756	97237604	97237663	GDF6		8	8q22.1	0.408163	0.201613	0.00714597	0.122449	0.0645161	0.224241	IBC
A_14_P100574	97313103	97313162	UQCRB	ubiquinol-cytochrome c reductase binding protein	8	8q22.1	0.408163	0.201613	0.00714597	0.122449	0.0645161	0.224241	IBC
A_16_P38499825	97332260	97332319	MTERFD1	MTERF domain containing 1	8	8q22.1	0.408163	0.201613	0.00714597	0.122449	0.0645161	0.224241	IBC
A_14_P127306	97415915	97415974	PTDSS1	phosphatidylserine synthase 1	8	8q22.1	0.408163	0.201613	0.00714597	0.122449	0.0645161	0.224241	IBC
A_14_P109550	97689811	97689870	SDC2	syndecan 2	8	8q22.1	0.408163	0.209677	0.0123729	0.122449	0.0645161	0.224241	IBC
A_14_P105873	98224056	98224115	PGCP	plasma glutamate carboxypeptidase	8	8q22.1	0.408163	0.209677	0.0123729	0.122449	0.0645161	0.224241	IBC
A_16_P01975803	98266606	98266665	AK091342	CDNA FLJ34023 fis, clone FCBBF2003083	8	8q22.1	0.408163	0.209677	0.0123729	0.122449	0.0645161	0.224241	IBC
A_14_P108588	98358328	98358387	TSPYL5	CDNA FLJ34023 fis, clone FCBBF2003083	8	8q22.1	0.408163	0.209677	0.0123729	0.122449	0.0645161	0.224241	IBC
A_14_P124205	98804254	98804313	MTDH	metadherin	8	8q22.1	0.408163	0.209677	0.0123729	0.122449	0.0645161	0.224241	IBC
A_16_P01976600	98930950	98931009	LAPTM4B	lysosomal associated protein transmembrane 4 beta	8	8q22.1	0.408163	0.209677	0.0123729	0.122449	0.0645161	0.224241	IBC
A_16_P18409774	98968102	98968161	MATN2	matrilin 2	8	8q22.1	0.408163	0.209677	0.0123729	0.122449	0.0645161	0.224241	IBC
A_14_P115601	99123154	99123213	SNORA72	small nucleolar RNA, H/ACA box 72	8	8q22.2	0.469388	0.217742	0.00150235	0.122449	0.0645161	0.224241	IBC
A_16_P18410274	99174876	99174935	C8orf47	chromosome 8 open reading frame 47	8	8q22.2	0.469388	0.217742	0.00150235	0.122449	0.0645161	0.224241	IBC
A_14_P113376	99197375	99197434	HRSP12	heat-responsive protein 12	8	8q22.2	0.469388	0.225806	0.00276632	0.122449	0.0725806	0.368096	IBC
A_16_P18410411	99228075	99228134	POP1	processing of precursor 1, ribonuclease P/MRP subunit (S. cerevisiae)	8	8q22.2	0.469388	0.225806	0.00276632	0.122449	0.0725806	0.368096	IBC
A_14_P202493	99373586	99373645	NPAL2	NIPA-like domain containing 2	8	8q22.2	0.44898	0.217742	0.00451414	0.122449	0.0725806	0.368096	IBC
A_16_P01977481	99514366	99514425	KCNS2	potassium voltage-gated channel, delayed-rectifier, subfamily S, member 2	8	8q22.2	0.44898	0.217742	0.00451414	0.122449	0.0645161	0.224241	IBC
A_16_P38505302	99617008	99617067	STK3	serine/threonine kinase 3 (STE20 homolog, yeast)	8	8q22.2	0.44898	0.217742	0.00451414	0.122449	0.0645161	0.224241	IBC
A_16_P01978112	100013860	100013919	AK131363		8	8q22.2	0.469388	0.209677	0.00124918	0.102041	0.0645161	0.521966	IBC
A_14_P112461	100026670	100026729	OSR2	odd-skipped related 2 (Drosophila)	8	8q22.2	0.469388	0.209677	0.00124918	0.102041	0.0645161	0.521966	IBC
A_16_P01979077	100723424	100723483	VPS13B		8	8q22.2	0.44898	0.233871	0.00898658	0.102041	0.0725806	0.542744	IBC
A_14_P138034	100974203	100974262	COX6C	cytochrome c oxidase subunit VIc	8	8q22.2	0.489796	0.217742	0.00074445	0.102041	0.0725806	0.542744	IBC
A_14_P105472	101186763	101186822	RGS22	regulator of G-protein signaling 22	8	8q22.2	0.489796	0.217742	0.00074445	0.142857	0.0725806	0.156804	IBC
A_16_P18415004	101226495	101226554	FBXO43		8	8q22.2	0.489796	0.217742	0.00074445	0.142857	0.0725806	0.156804	IBC
A_14_P128401	101233889	101233948	POLR2K	polymerase (RNA) II (DNA directed) polypeptide K, 7.0kDa	8	8q22.2	0.489796	0.217742	0.00074445	0.142857	0.0725806	0.156804	IBC
A_14_P125262	101320748	101320807	SPAG1	sperm associated antigen 1	8	8q22.2	0.489796	0.225806	0.000932416	0.163265	0.0725806	0.0895275	IBC
A_16_P18415370	101369605	101369664	RNF19A	ring finger protein 19A	8	8q22.2	0.489796	0.225806	0.000932416	0.163265	0.0725806	0.0895275	IBC
A_16_P01980013	101386687	101386746	RNF19		8	8q22.2	0.489796	0.225806	0.000932416	0.163265	0.0725806	0.0895275	IBC
A_16_P01980433	101640408	101640467	ANKRD46	ankyrin repeat domain 46	8	8q22.3	0.469388	0.217742	0.00150235	0.163265	0.0645161	0.0757995	IBC
A_16_P01980556	101726451	101726510	MGC39715		8	8q22.3	0.44898	0.217742	0.00451414	0.142857	0.0645161	0.131991	IBC
A_14_P201438	101800174	101800233	PABPC1	CDNA FLJ25706 fis, clone TST04817	8	8q22.3	0.44898	0.217742	0.00451414	0.142857	0.0645161	0.131991	IBC
A_16_P18416913	101998445	101998504	AF074984	Clone 23548 mRNA sequence	8	8q22.3	0.44898	0.217742	0.00451414	0.142857	0.0645161	0.131991	IBC
A_16_P01980961	102034642	102034701	YWHAZ		8	8q22.3	0.44898	0.217742	0.00451414	0.142857	0.0645161	0.131991	IBC
A_16_P01981146	102155549	102155608	AK124959		8	8q22.3	0.44898	0.217742	0.00451414	0.142857	0.0645161	0.131991	IBC
A_16_P38511525	102228419	102228478	LOC157562	hypothetical protein LOC157562	8	8q22.3	0.44898	0.225806	0.00508653	0.142857	0.0645161	0.131991	IBC
A_16_P18417554	102252667	102252726	G65598	Transcribed locus	8	8q22.3	0.44898	0.225806	0.00508653	0.142857	0.0645161	0.131991	IBC
A_16_P01981293	102262556	102262615	BC035156	CDNA clone IMAGE:5265210	8	8q22.3	0.44898	0.225806	0.00508653	0.142857	0.0645161	0.131991	IBC
A_14_P201678	102286181	102286240	ZNF706	zinc finger protein 706	8	8q22.3	0.44898	0.225806	0.00508653	0.142857	0.0645161	0.131991	IBC
A_16_P01981563	102442641	102442700	NACAP1	nascent-polypeptide-associated complex alpha polypeptide pseudogene 1	8	8q22.3	0.44898	0.233871	0.00898658	0.142857	0.0645161	0.131991	IBC
A_16_P18418819	102745921	102745980	GRHL2	grainyhead-like 2 (Drosophila)	8	8q22.3	0.489796	0.225806	0.000932416	0.142857	0.0645161	0.131991	IBC
A_14_P112857	103072432	103072491	NCALD	neurocalcin delta	8	8q22.3	0.44898	0.233871	0.00898658	0.142857	0.0725806	0.156804	IBC
A_16_P01982862	103300195	103300254	RRM2B	ribonucleotide reductase M2 B (TP53 inducible)	8	8q22.3	0.44898	0.225806	0.00508653	0.142857	0.0645161	0.131991	IBC
A_16_P18420301	103345923	103345982	UBR5	ubiquitin protein ligase E3 component n-recognin 5	8	8q22.3	0.469388	0.217742	0.00150235	0.142857	0.0645161	0.131991	IBC
A_14_P104763	103637344	103637403	ODF1	outer dense fiber of sperm tails 1	8	8q22.3	0.469388	0.209677	0.00124918	0.183673	0.0645161	0.0243168	IBC
A_14_P201539	103733747	103733806	KLF10	Kruppel-like factor 10	8	8q22.3	0.469388	0.209677	0.00124918	0.183673	0.0645161	0.0243168	IBC
A_16_P01983730	103889539	103889598	FLJ45248		8	8q22.3	0.489796	0.209677	0.000394609	0.183673	0.0645161	0.0243168	IBC
A_14_P201613	103939518	103939577	AZIN1	antizyme inhibitor 1	8	8q22.3	0.489796	0.209677	0.000394609	0.163265	0.0645161	0.0757995	IBC
A_16_P18421861	103971257	103971316	BC037349	CDNA clone IMAGE:5266332	8	8q22.3	0.489796	0.209677	0.000394609	0.163265	0.0725806	0.0895275	IBC
A_14_P138876	104150582	104150641	ATP6V1C1	ATPase, H+ transporting, lysosomal 42kDa, V1 subunit C1	8	8q22.3	0.510204	0.209677	0.000176285	0.163265	0.0725806	0.0895275	IBC
A_14_P115434	104221279	104221338	C8orf56	chromosome 8 open reading frame 56	8	8q22.3	0.510204	0.209677	0.000176285	0.142857	0.0725806	0.156804	IBC
A_14_P116261	104310836	104310895	BAALC	brain and acute leukemia, cytoplasmic	8	8q22.3	0.510204	0.209677	0.000176285	0.142857	0.0725806	0.156804	IBC
A_16_P01984377	104324608	104324667	LOC257152	hypothetical protein LOC257152	8	8q22.3	0.510204	0.209677	0.000176285	0.142857	0.0725806	0.156804	IBC
A_16_P18422812	104363817	104363876	AK125733		8	8q22.3	0.510204	0.209677	0.000176285	0.142857	0.0725806	0.156804	IBC
A_14_P118822	104406733	104406792	FZD6	frizzled homolog 6 (Drosophila)	8	8q22.3	0.510204	0.209677	0.000176285	0.142857	0.0725806	0.156804	IBC
A_14_P131354	104459437	104459496	CTHRC1	collagen triple helix repeat containing 1	8	8q22.3	0.530612	0.217742	0.000102757	0.142857	0.0725806	0.156804	IBC
A_16_P01984625	104494183	104494242	SLC25A32	solute carrier family 25, member 32	8	8q22.3	0.510204	0.209677	0.000176285	0.122449	0.0725806	0.368096	IBC
A_14_P106699	104520725	104520784	WDSOF1	WD repeats and SOF1 domain containing	8	8q22.3	0.510204	0.209677	0.000176285	0.122449	0.0725806	0.368096	IBC
A_16_P01984851	104655550	104655609	AK126939		8	8q22.3	0.510204	0.209677	0.000176285	0.122449	0.0725806	0.368096	IBC
A_14_P127783	105330959	105331018	RIMS2	regulating synaptic membrane exocytosis 2	8	8q22.3	0.489796	0.201613	0.000301219	0.122449	0.0725806	0.368096	IBC
A_16_P18425158	105436320	105436379	TM7SF4	transmembrane 7 superfamily member 4	8	8q22.3	0.489796	0.209677	0.000394609	0.122449	0.0725806	0.368096	IBC
A_14_P128098	105546123	105546182	DPYS	dihydropyrimidinase	8	8q22.3	0.469388	0.209677	0.00124918	0.122449	0.0725806	0.368096	IBC
A_14_P105553	105669287	105669346	LRP12	low density lipoprotein-related protein 12	8	8q22.3	0.469388	0.217742	0.00150235	0.122449	0.0725806	0.368096	IBC
A_16_P38523248	106877796	106877855	ZFPM2	zinc finger protein, multitype 2	8	8q23.1	0.44898	0.193548	0.00104664	0.122449	0.0645161	0.224241	IBC
A_16_P18429953	107347704	107347763	LOC346887	similar to solute carrier family 16 (monocarboxylic acid transporters), member 14	8	8q23.1	0.469388	0.201613	0.00064371	0.122449	0.0645161	0.224241	IBC
A_14_P134325	107739119	107739178	AK124441		8	8q23.1	0.44898	0.209677	0.00240884	0.122449	0.0645161	0.224241	IBC
A_14_P103617	107833176	107833235	OXR1	oxidation resistance 1	8	8q23.1	0.44898	0.209677	0.00240884	0.122449	0.0645161	0.224241	IBC
A_14_P126591	107851240	107851299	ABRA	actin-binding Rho activating protein	8	8q23.1	0.44898	0.209677	0.00240884	0.122449	0.0645161	0.224241	IBC
A_16_P18433182	108574410	108574469	ANGPT1	angiopoietin 1	8	8q23.1	0.469388	0.209677	0.00124918	0.122449	0.0645161	0.224241	IBC
A_16_P18434200	109032373	109032432	RSPO2	R-spondin 2 homolog (Xenopus laevis)	8	8q23.1	0.44898	0.209677	0.00240884	0.122449	0.0725806	0.368096	IBC
A_16_P18434898	109329203	109329262	EIF3E	eukaryotic translation initiation factor 3, subunit E	8	8q23.1	0.469388	0.209677	0.00124918	0.142857	0.0645161	0.131991	IBC
A_14_P100072	109567976	109568035	TTC35	tetratricopeptide repeat domain 35	8	8q23.1	0.44898	0.209677	0.00240884	0.122449	0.0645161	0.224241	IBC
A_16_P18436201	109857433	109857492	TMEM74	Transmembrane protein 74	8	8q23.1	0.44898	0.209677	0.00240884	0.122449	0.0645161	0.224241	IBC
A_16_P01992996	110200850	110200909	TRHR	thyrotropin-releasing hormone receptor	8	8q23.1	0.469388	0.209677	0.00124918	0.122449	0.0645161	0.224241	IBC
A_14_P104794	110411222	110411281	NUDCD1	NudC domain containing 1	8	8q23.1	0.44898	0.201613	0.00208717	0.122449	0.0645161	0.224241	IBC
A_16_P38531830	110425091	110425150	ENY2	Enhancer of yellow 2 homolog (Drosophila)	8	8q23.1	0.44898	0.201613	0.00208717	0.122449	0.0645161	0.224241	IBC
A_16_P38532438	110609762	110609821	PKHD1L1	polycystic kidney and hepatic disease 1 (autosomal recessive)-like 1	8	8q23.2	0.44898	0.201613	0.00208717	0.122449	0.0645161	0.224241	IBC
A_14_P115466	110642228	110642287	EBAG9	estrogen receptor binding site associated, antigen, 9	8	8q23.2	0.44898	0.201613	0.00208717	0.122449	0.0645161	0.224241	IBC
A_14_P107741	110766263	110766322	GOLSYN	Golgi-localized protein	8	8q23.2	0.44898	0.201613	0.00208717	0.122449	0.0645161	0.224241	IBC
A_14_P108821	111054952	111055011	KCNV1	potassium channel, subfamily V, member 1	8	8q23.2	0.44898	0.217742	0.00451414	0.122449	0.0725806	0.368096	IBC
A_16_P18446417	114171044	114171103	CSMD3		8	8q23.3	0.428571	0.201613	0.00384739	0.142857	0.0645161	0.131991	IBC
A_16_P02002067	116704979	116705038	TRPS1	trichorhinophalangeal syndrome I	8	8q23.3	0.469388	0.233871	0.00323094	0.22449	0.0645161	0.00527338	IBC
A_16_P02002951	117234979	117235038	BC040336	CDNA clone IMAGE:4838258	8	8q23.3	0.489796	0.241935	0.00203865	0.22449	0.0645161	0.00527338	IBC
A_14_P133138	117768619	117768678	EIF3H	eukaryotic translation initiation factor 3, subunit H	8	8q24.11	0.489796	0.225806	0.000932416	0.22449	0.0645161	0.00527338	IBC
A_16_P18455248	117841711	117841770	AK093128		8	8q24.11	0.510204	0.225806	0.0004416	0.22449	0.0645161	0.00527338	IBC
A_14_P122923	117851748	117851807	C8orf53	chromosome 8 open reading frame 53	8	8q24.11	0.510204	0.225806	0.0004416	0.22449	0.0645161	0.00527338	IBC
A_14_P135546	117868154	117868213	AK055279		8	8q24.11	0.510204	0.225806	0.0004416	0.22449	0.0645161	0.00527338	IBC
A_16_P18455507	117943204	117943263	RAD21	RAD21 homolog (S. pombe)	8	8q24.11	0.510204	0.233871	0.000888483	0.22449	0.0645161	0.00527338	IBC
A_16_P02004202	118024014	118024073	LOC441376		8	8q24.11	0.530612	0.217742	0.000102757	0.22449	0.0645161	0.00527338	IBC
A_16_P18456137	118191690	118191749	AL713790		8	8q24.11	0.530612	0.217742	0.000102757	0.22449	0.0645161	0.00527338	IBC
A_14_P138620	118257836	118257895	SLC30A8	solute carrier family 30 (zinc transporter), member 8	8	8q24.11	0.530612	0.217742	0.000102757	0.22449	0.0645161	0.00527338	IBC
A_14_P135167	118617959	118618018	MED30	mediator complex subunit 30	8	8q24.11	0.530612	0.225806	0.000211701	0.22449	0.0645161	0.00527338	IBC
A_16_P02005317	118785469	118785528	BX649173		8	8q24.11	0.530612	0.225806	0.000211701	0.22449	0.0645161	0.00527338	IBC
A_14_P131162	119191934	119191993	EXT1	exostoses (multiple) 1	8	8q24.11	0.530612	0.233871	0.000260432	0.244898	0.0645161	0.00244346	IBC
A_16_P02006846	119699300	119699359	SAMD12	sterile alpha motif domain containing 12	8	8q24.12	0.530612	0.233871	0.000260432	0.204082	0.0725806	0.0273769	IBC
A_16_P18460906	120030757	120030816	TNFRSF11B	tumor necrosis factor receptor superfamily, member 11b (osteoprotegerin)	8	8q24.12	0.510204	0.233871	0.000888483	0.204082	0.0725806	0.0273769	IBC
A_14_P106637	120187577	120187636	COLEC10	collectin sub-family member 10 (C-type lectin)	8	8q24.12	0.510204	0.233871	0.000888483	0.22449	0.0725806	0.00790819	IBC
A_14_P116326	120326190	120326249	MAL2	mal, T-cell differentiation protein 2	8	8q24.12	0.489796	0.233871	0.00168312	0.22449	0.0725806	0.00790819	IBC
A_16_P18461949	120504967	120505026	NOV	nephroblastoma overexpressed gene	8	8q24.12	0.489796	0.233871	0.00168312	0.22449	0.0725806	0.00790819	IBC
A_14_P138841	120720199	120720258	ENPP2	ectonucleotide pyrophosphatase/phosphodiesterase 2 (autotaxin)	8	8q24.12	0.489796	0.233871	0.00168312	0.22449	0.0725806	0.00790819	IBC
A_16_P18462707	120820176	120820235	TAF2	TAF2 RNA polymerase II, TATA box binding protein (TBP)-associated factor, 150kDa	8	8q24.12	0.489796	0.241935	0.00203865	0.22449	0.0806452	0.0175157	IBC
A_16_P02008585	120934521	120934580	DCC1	defective in sister chromatid cohesion homolog 1 (S. cerevisiae)	8	8q24.12	0.469388	0.233871	0.00323094	0.204082	0.0806452	0.0330494	IBC
A_16_P38558130	121124797	121124856	DEPDC6	DEP domain containing 6	8	8q24.12	0.428571	0.225806	0.0141461	0.183673	0.0725806	0.0496853	IBC
A_14_P118389	121131965	121132024	AK023916	Transcribed locus	8	8q24.12	0.428571	0.225806	0.0141461	0.183673	0.0725806	0.0496853	IBC
A_16_P38558287	121195804	121195863	BC036192		8	8q24.12	0.428571	0.225806	0.0141461	0.183673	0.0725806	0.0496853	IBC
A_16_P38558983	121453118	121453177	COL14A1	collagen, type XIV, alpha 1 (undulin)	8	8q24.12	0.428571	0.225806	0.0141461	0.183673	0.0725806	0.0496853	IBC
A_16_P18464416	121521330	121521389	MRPL13	mitochondrial ribosomal protein L13	8	8q24.12	0.428571	0.225806	0.0141461	0.183673	0.0725806	0.0496853	IBC
A_14_P112436	121604074	121604133	MTBP	Mdm2, transformed 3T3 cell double minute 2, p53 binding protein (mouse) binding protein, 104kDa	8	8q24.12	0.428571	0.225806	0.0141461	0.183673	0.0725806	0.0496853	IBC
A_16_P18465339	121886084	121886143	SNTB1	syntrophin, beta 1 (dystrophin-associated protein A1, 59kDa, basic component 1)	8	8q24.12	0.428571	0.225806	0.0141461	0.183673	0.0806452	0.0614982	IBC
A_14_P201185	122722343	122722402	HAS2	hyaluronan synthase 2	8	8q24.13	0.469388	0.225806	0.00276632	0.183673	0.0725806	0.0496853	IBC
A_16_P02011906	123193685	123193744	BC041064		8	8q24.13	0.428571	0.225806	0.0141461	0.183673	0.0725806	0.0496853	IBC
A_16_P02013194	124051133	124051192	ZHX2	zinc fingers and homeoboxes 2	8	8q24.13	0.44898	0.233871	0.00898658	0.204082	0.0725806	0.0273769	IBC
A_16_P02013301	124119945	124120004	DERL1	Der1-like domain family, member 1	8	8q24.13	0.44898	0.233871	0.00898658	0.204082	0.0725806	0.0273769	IBC
A_16_P02013426	124231502	124231561	WDR67	WD repeat domain 67	8	8q24.13	0.44898	0.233871	0.00898658	0.204082	0.0645161	0.0114339	IBC
A_16_P18471216	124290815	124290874	FAM83A	family with sequence similarity 83, member A	8	8q24.13	0.44898	0.233871	0.00898658	0.204082	0.0645161	0.0114339	IBC
A_16_P18471395	124352854	124352913	C8orf76	chromosome 8 open reading frame 76	8	8q24.13	0.44898	0.233871	0.00898658	0.204082	0.0645161	0.0114339	IBC
A_16_P02013711	124432484	124432543	ATAD2	ATPase family, AAA domain containing 2	8	8q24.13	0.44898	0.233871	0.00898658	0.204082	0.0645161	0.0114339	IBC
A_16_P38566544	124491565	124491624	CR749832		8	8q24.13	0.469388	0.233871	0.00323094	0.22449	0.0645161	0.00527338	IBC
A_14_P107007	124522921	124522980	C8orf32	chromosome 8 open reading frame 32	8	8q24.13	0.469388	0.233871	0.00323094	0.22449	0.0645161	0.00527338	IBC
A_16_P18471867	124579467	124579526	BC022416	CDNA FLJ39585 fis, clone SKMUS2006633	8	8q24.13	0.469388	0.233871	0.00323094	0.22449	0.0645161	0.00527338	IBC
A_14_P125832	124620878	124620937	FBXO32	F-box protein 32	8	8q24.13	0.469388	0.233871	0.00323094	0.22449	0.0645161	0.00527338	IBC
A_14_P100492	124728622	124728681	AB196636		8	8q24.13	0.469388	0.233871	0.00323094	0.22449	0.0645161	0.00527338	IBC
A_14_P130404	124815958	124816017	ANXA13	annexin A13	8	8q24.13	0.469388	0.233871	0.00323094	0.22449	0.0725806	0.00790819	IBC
A_16_P38567632	124896503	124896562	FAM91A1	family with sequence similarity 91, member A1	8	8q24.13	0.469388	0.233871	0.00323094	0.22449	0.0725806	0.00790819	IBC
A_16_P18473040	125037329	125037388	C8ORFK23		8	8q24.13	0.469388	0.241935	0.0056503	0.244898	0.0725806	0.00354625	IBC
A_14_P101318	125095094	125095153	C8orf54	chromosome 8 open reading frame 54	8	8q24.13	0.469388	0.241935	0.0056503	0.244898	0.0725806	0.00354625	IBC
A_14_P110247	125250769	125250828	C8orf78		8	8q24.13	0.469388	0.233871	0.00323094	0.22449	0.0725806	0.00790819	IBC
A_16_P02014982	125327479	125327538	BC015129	CDNA clone IMAGE:3931942	8	8q24.13	0.44898	0.233871	0.00898658	0.22449	0.0725806	0.00790819	IBC
A_16_P02015070	125387734	125387793	LOC286052	hypothetical protein LOC286052	8	8q24.13	0.44898	0.233871	0.00898658	0.22449	0.0806452	0.0175157	IBC
A_14_P118559	125448524	125448583	TMEM65	transmembrane protein 65	8	8q24.13	0.44898	0.233871	0.00898658	0.22449	0.0806452	0.0175157	IBC
A_14_P129371	125533175	125533234	TRMT12	tRNA methyltransferase 12 homolog (S. cerevisiae)	8	8q24.13	0.44898	0.241935	0.00995674	0.22449	0.0806452	0.0175157	IBC
A_16_P18474138	125550544	125550603	CR933665	CDNA FLJ90571 fis, clone OVARC1001725, highly similar to Homo sapiens patched related protein TRC8 (TRC8) gene	8	8q24.13	0.44898	0.241935	0.00995674	0.22449	0.0806452	0.0175157	IBC
A_14_P110401	125567865	125567924	RNF139	ring finger protein 139	8	8q24.13	0.44898	0.241935	0.00995674	0.22449	0.0806452	0.0175157	IBC
A_14_P113327	125620117	125620176	TATDN1	TatD DNase domain containing 1	8	8q24.13	0.44898	0.241935	0.00995674	0.22449	0.0806452	0.0175157	IBC
A_14_P133978	125628688	125628747	NDUFB9	NADH dehydrogenase (ubiquinone) 1 beta subcomplex, 9, 22kDa	8	8q24.13	0.44898	0.241935	0.00995674	0.22449	0.0806452	0.0175157	IBC
A_16_P02015696	125803551	125803610	MTSS1	Metastasis suppressor 1	8	8q24.13	0.44898	0.241935	0.00995674	0.204082	0.0806452	0.0330494	IBC
A_16_P18475361	126022325	126022384	LOC157381	hypothetical protein LOC157381	8	8q24.13	0.44898	0.241935	0.00995674	0.204082	0.0806452	0.0330494	IBC
A_14_P109768	126058795	126058854	ZNF572	zinc finger protein 572	8	8q24.13	0.44898	0.241935	0.00995674	0.204082	0.0806452	0.0330494	IBC
A_16_P18475542	126095542	126095601	SQLE	squalene epoxidase	8	8q24.13	0.44898	0.241935	0.00995674	0.204082	0.0806452	0.0330494	IBC
A_14_P117088	126171172	126171231	KIAA0196	KIAA0196	8	8q24.13	0.44898	0.241935	0.00995674	0.204082	0.0806452	0.0330494	IBC
A_16_P18476504	126448257	126448316	NSMCE2	non-SMC element 2, MMS21 homolog (S. cerevisiae)	8	8q24.13	0.44898	0.241935	0.00995674	0.204082	0.0806452	0.0330494	IBC
A_14_P106006	126518817	126518876	TRIB1	tribbles homolog 1 (Drosophila)	8	8q24.13	0.44898	0.241935	0.00995674	0.204082	0.0806452	0.0330494	IBC
A_16_P18477607	126917823	126917882	AK093407		8	8q24.13	0.469388	0.241935	0.0056503	0.204082	0.0806452	0.0330494	IBC
A_16_P02017459	127027319	127027378	LOC650095	Similar to Superoxide dismutase	8	8q24.13	0.469388	0.233871	0.00323094	0.204082	0.0806452	0.0330494	IBC
A_16_P18478614	127408340	127408399	BC038572	Homo sapiens, clone IMAGE:4413977, mRNA	8	8q24.21	0.469388	0.241935	0.0056503	0.204082	0.0806452	0.0330494	IBC
A_14_P103927	127637554	127637613	FAM84B	Family with sequence similarity 84, member B	8	8q24.21	0.44898	0.241935	0.00995674	0.204082	0.0806452	0.0330494	IBC
A_16_P18481907	128797789	128797848	BC042052	Transcribed locus	8	8q24.21	0.44898	0.241935	0.00995674	0.22449	0.0967742	0.0439579	IBC
A_14_P123915	128816904	128816963	M13930	Transcribed locus	8	8q24.21	0.44898	0.233871	0.00898658	0.22449	0.0806452	0.0175157	IBC
A_14_P137636	128822396	128822455	MYC	Transcribed locus	8	8q24.21	0.44898	0.233871	0.00898658	0.22449	0.0806452	0.0175157	IBC
A_16_P02020366	129177251	129177310	PVT1	Pvt1 oncogene homolog, MYC activator (mouse)	8	8q24.21	0.44898	0.241935	0.00995674	0.244898	0.0725806	0.00354625	IBC
A_16_P02020870	129491203	129491262	BC009730	Homo sapiens, clone IMAGE:3884408, mRNA	8	8q24.21	0.428571	0.225806	0.0141461	0.244898	0.0725806	0.00354625	IBC
A_16_P18485704	130319437	130319496	CR593328		8	8q24.21	0.428571	0.217742	0.00795845	0.22449	0.0725806	0.00790819	IBC
A_16_P02022649	130760501	130760560	CCDC26		8	8q24.21	0.387755	0.217742	0.0346495	0.183673	0.0725806	0.0496853	IBC
A_16_P02022763	130868040	130868099	MLZE		8	8q24.21	0.387755	0.217742	0.0346495	0.183673	0.0645161	0.0243168	IBC
A_14_P109568	130926565	130926624	FAM49B	family with sequence similarity 49, member B	8	8q24.21	0.387755	0.217742	0.0346495	0.183673	0.0645161	0.0243168	IBC
A_16_P18488116	131361922	131361981	DDEF1		8	8q24.21	0.408163	0.209677	0.0123729	0.183673	0.0725806	0.0496853	IBC
A_14_P201816	131377656	131377715	DDEF1IT1	DDEF1 intronic transcript 1	8	8q24.21	0.408163	0.209677	0.0123729	0.183673	0.0725806	0.0496853	IBC
A_16_P02023768	131505076	131505135	AX721314	---	8	8q24.22	0.408163	0.209677	0.0123729	0.204082	0.0725806	0.0273769	IBC
A_14_P121325	132071935	132071994	ADCY8	adenylate cyclase 8 (brain)	8	8q24.22	0.408163	0.209677	0.0123729	0.183673	0.0725806	0.0496853	IBC
A_16_P18492139	133094826	133094885	EFR3A	EFR3 homolog A (S. cerevisiae)	8	8q24.22	0.428571	0.225806	0.0141461	0.163265	0.0645161	0.0757995	IBC
A_16_P02026047	133161466	133161525	HHLA1	HERV-H LTR-associating 1	8	8q24.22	0.408163	0.225806	0.0230774	0.163265	0.0645161	0.0757995	IBC
A_16_P38587658	133240739	133240798	KCNQ3	potassium voltage-gated channel, KQT-like subfamily, member 3	8	8q24.22	0.387755	0.225806	0.0376138	0.163265	0.0645161	0.0757995	IBC
A_14_P130125	134216293	134216352	TG	thyroglobulin	8	8q24.22	0.387755	0.217742	0.0346495	0.163265	0.0725806	0.0895275	IBC
A_14_P111681	134309076	134309135	WISP1	WNT1 inducible signaling pathway protein 1	8	8q24.22	0.387755	0.217742	0.0346495	0.163265	0.0725806	0.0895275	IBC
A_14_P201418	134377012	134377071	NDRG1	N-myc downstream regulated gene 1	8	8q24.22	0.387755	0.217742	0.0346495	0.163265	0.0725806	0.0895275	IBC
A_16_P02028238	134535100	134535159	LOC286167	hypothetical protein LOC286167	8	8q24.22	0.387755	0.217742	0.0346495	0.163265	0.0725806	0.0895275	IBC
A_16_P18496353	134644491	134644550	ST3GAL1	MRNA; cDNA DKFZp547L2215 (from clone DKFZp547L2215)	8	8q24.22	0.387755	0.209677	0.0210537	0.163265	0.0645161	0.0757995	IBC
A_16_P02028444	134654280	134654339	CR619813	Full-length cDNA clone CS0DI026YO05 of Placenta Cot 25-normalized of Homo sapiens (human)	8	8q24.22	0.387755	0.209677	0.0210537	0.163265	0.0645161	0.0757995	IBC
A_16_P02030010	135713909	135713968	ZFAT1	ZFAT zinc finger 1	8	8q24.22	0.387755	0.209677	0.0210537	0.142857	0.0564516	0.0703806	IBC
A_16_P02030105	135791049	135791108	ZNF406		8	8q24.22	0.387755	0.217742	0.0346495	0.142857	0.0564516	0.0703806	IBC
A_16_P18499391	135875959	135876018	AL833303	Full length insert cDNA clone YZ04E02	8	8q24.22	0.387755	0.217742	0.0346495	0.142857	0.0645161	0.131991	IBC
A_16_P18499555	135933227	135933286	AK057402		8	8q24.22	0.387755	0.217742	0.0346495	0.142857	0.0645161	0.131991	IBC
A_14_P119586	136365758	136365817	BC045817		8	8q24.22	0.387755	0.217742	0.0346495	0.122449	0.0645161	0.224241	IBC
A_14_P114504	136728904	136728963	KHDRBS3	KH domain containing, RNA binding, signal transduction associated 3	8	8q24.23	0.387755	0.217742	0.0346495	0.122449	0.0645161	0.224241	IBC
A_16_P02034705	139021568	139021627	AK127771		8	8q24.23	0.408163	0.217742	0.0140637	0.142857	0.0725806	0.156804	IBC
A_14_P202241	139233241	139233300	FAM135B	family with sequence similarity 135, member B	8	8q24.23	0.408163	0.209677	0.0123729	0.142857	0.0725806	0.156804	IBC
A_16_P02035115	139320460	139320519	CR936831		8	8q24.23	0.408163	0.209677	0.0123729	0.142857	0.0725806	0.156804	IBC
A_16_P18508181	139549632	139549691	BC037288		8	8q24.23	0.387755	0.217742	0.0346495	0.142857	0.0725806	0.156804	IBC
A_16_P18508249	139572895	139572954	AB196635		8	8q24.23	0.387755	0.217742	0.0346495	0.142857	0.0725806	0.156804	IBC
A_16_P02035859	139778266	139778325	COL22A1		8	8q24.23	0.387755	0.217742	0.0346495	0.142857	0.0645161	0.131991	IBC
A_16_P18511046	140676933	140676992	KCNK9	CDNA FLJ37082 fis, clone BRACE2016465	8	8q24.3	0.367347	0.201613	0.0313252	0.142857	0.0645161	0.131991	IBC
A_16_P02038552	141531006	141531065	NIBP	NIK and IKK{beta} binding protein	8	8q24.3	0.346939	0.193548	0.0462788	0.102041	0.0483871	0.296589	IBC
A_16_P02038952	141814624	141814683	PTK2	PTK2 protein tyrosine kinase 2	8	8q24.3	0.346939	0.193548	0.0462788	0.0816327	0.0483871	0.471826	IBC
A_16_P39084845	74590197	74590256	ECD	ecdysoneless homolog (Drosophila)	10	10q22.1	0.0612245	0	0.0217252	0.0204082	0	0.283237	IBC
A_16_P18975689	74613892	74613951	FAM149B1	family with sequence similarity 149, member B1	10	10q22.2	0.0612245	0	0.0217252	0.0204082	0	0.283237	IBC
A_16_P18976301	74922478	74922537	PPP3CB	protein phosphatase 3 (formerly 2B), catalytic subunit, beta isoform	10	10q22.2	0.0612245	0	0.0217252	0.0204082	0	0.283237	IBC
A_16_P39085756	74982936	74982995	USP54		10	10q22.2	0.0612245	0	0.0217252	0.0204082	0	0.283237	IBC
A_16_P18976498	75001079	75001138	BX649087		10	10q22.2	0.0612245	0	0.0217252	0.0204082	0	0.283237	IBC
A_14_P200271	75069380	75069439	MYOZ1	myozenin 1	10	10q22.2	0.0612245	0	0.0217252	0.0204082	0	0.283237	IBC
A_14_P118442	75076818	75076877	SYNPO2L	synaptopodin 2-like	10	10q22.2	0.0612245	0	0.0217252	0.0204082	0	0.283237	IBC
A_16_P18976681	75081501	75081560	AB188489		10	10q22.2	0.0612245	0	0.0217252	0.0204082	0	0.283237	IBC
A_16_P02292432	75086802	75086861	CTGLF2	centaurin, gamma-like family, member 2	10	10q22.2	0.0612245	0	0.0217252	0.0204082	0	0.283237	IBC
A_16_P18976861	75154487	75154546	AF086522		10	10q22.2	0.0612245	0	0.0217252	0.0204082	0	0.283237	IBC
A_16_P39086219	75165960	75166019	AK094774		10	10q22.2	0.0612245	0	0.0217252	0.0408163	0	0.0790429	IBC
A_14_P104672	75201837	75201896	SEC24C	SEC24 related gene family, member C (S. cerevisiae)	10	10q22.2	0.0612245	0	0.0217252	0.0408163	0	0.0790429	IBC
A_14_P115974	75203876	75203935	FUT11	fucosyltransferase 11 (alpha (1,3) fucosyltransferase)	10	10q22.2	0.0816327	0.00806452	0.0231317	0.0408163	0	0.0790429	IBC
A_16_P02292520	75213047	75213106	CHCHD1	coiled-coil-helix-coiled-coil-helix domain containing 1	10	10q22.2	0.0816327	0.00806452	0.0231317	0.0408163	0	0.0790429	IBC
A_16_P18977076	75229712	75229771	KIAA0913	KIAA0913	10	10q22.2	0.0816327	0.00806452	0.0231317	0.0408163	0	0.0790429	IBC
A_14_P106922	75240328	75240387	NDST2	N-deacetylase/N-sulfotransferase (heparan glucosaminyl) 2	10	10q22.2	0.0816327	0.00806452	0.0231317	0.0408163	0	0.0790429	IBC
A_16_P18977213	75273770	75273829	CAMK2G	calcium/calmodulin-dependent protein kinase (CaM kinase) II gamma	10	10q22.2	0.0816327	0.00806452	0.0231317	0.0408163	0	0.0790429	IBC
A_16_P18990468	80491186	80491245	LOC283050	hypothetical protein LOC283050	10	10q22.3	0.102041	0.0241935	0.0419949	0.0204082	0	0.283237	IBC
A_16_P02300719	80558346	80558405	ZMIZ1	zinc finger, MIZ-type containing 1	10	10q22.3	0.102041	0.0241935	0.0419949	0.0204082	0	0.283237	IBC
A_14_P136456	80781684	80781743	PPIF	peptidylprolyl isomerase F (cyclophilin F)	10	10q22.3	0.122449	0.0241935	0.0163121	0.0204082	0	0.283237	IBC
A_16_P02301288	80871880	80871939	C10orf56		10	10q22.3	0.102041	0.0241935	0.0419949	0.0204082	0.00806452	0.487431	IBC
A_16_P19529709	44586790	44586849	ARID2	AT rich interactive domain 2 (ARID, RFX-like)	12	12q12	0.0612245	0	0.0217252	0.0204082	0	0.283237	IBC
A_16_P19529932	44669056	44669115	SFRS2IP	splicing factor, arginine/serine-rich 2, interacting protein	12	12q13.11	0.0612245	0	0.0217252	0.0204082	0	0.283237	IBC
A_14_P131237	44945557	44945616	SLC38A1	solute carrier family 38, member 1	12	12q13.11	0.0612245	0	0.0217252	0.0204082	0	0.283237	IBC
A_14_P133911	45052567	45052626	SLC38A2	solute carrier family 38, member 2	12	12q13.11	0.0612245	0	0.0217252	0.0204082	0	0.283237	IBC
A_14_P201310	45053242	45053301	BC039429	CDNA clone IMAGE:5303182	12	12q13.11	0.0612245	0	0.0217252	0.0204082	0	0.283237	IBC
A_16_P02613556	45435960	45436019	BC014370	CDNA clone IMAGE:3961179	12	12q13.11	0.0612245	0	0.0217252	0.0204082	0	0.283237	IBC
A_16_P02613633	45477027	45477086	SLC38A4	CDNA clone IMAGE:3961179	12	12q13.11	0.0612245	0	0.0217252	0.0204082	0	0.283237	IBC
A_14_P202154	45758483	45758542	AMIGO2	adhesion molecule with Ig-like domain 2	12	12q13.11	0.0612245	0	0.0217252	0	0	1	IBC
A_16_P19532340	45882924	45882983	BC072670	CDNA FLJ35676 fis, clone SPLEN2018395	12	12q13.11	0.0612245	0	0.0217252	0	0	1	IBC
A_14_P101361	45916661	45916720	FAM113B	family with sequence similarity 113, member B	12	12q13.11	0.0612245	0	0.0217252	0	0	1	IBC
A_14_P106334	46359770	46359829	RPAP3	RNA polymerase II associated protein 3	12	12q13.11	0.0612245	0	0.0217252	0	0	1	IBC
A_14_P201654	69837676	69837735	TSPAN8	tetraspanin 8	12	12q15	0.102041	0.0241935	0.0419949	0.0204082	0.016129	1	IBC
A_16_P19588588	70101907	70101966	BC070168		12	12q21.1	0.102041	0.0241935	0.0419949	0.0204082	0.016129	1	IBC
A_16_P19589037	70263632	70263691	LGR5	leucine-rich repeat-containing G protein-coupled receptor 5	12	12q21.1	0.102041	0.0241935	0.0419949	0	0.016129	1	IBC
A_14_P134103	70307846	70307905	CCDC131	coiled-coil domain containing 131	12	12q21.1	0.102041	0.0241935	0.0419949	0	0.016129	1	IBC
A_16_P39721632	70322594	70322653	PSRC2		12	12q21.1	0.102041	0.0241935	0.0419949	0	0.016129	1	IBC
A_14_P138775	70360301	70360360	THAP2	THAP domain containing, apoptosis associated protein 2	12	12q21.1	0.102041	0.0241935	0.0419949	0.0204082	0.016129	1	IBC
A_14_P122385	70381964	70382023	TMEM19	transmembrane protein 19	12	12q21.1	0.102041	0.0241935	0.0419949	0.0204082	0.016129	1	IBC
A_14_P122834	70462057	70462116	RAB21	RAB21, member RAS oncogene family	12	12q21.1	0.102041	0.0241935	0.0419949	0	0.016129	1	IBC
A_14_P137092	70593767	70593826	TBC1D15	TBC1 domain family, member 15	12	12q21.1	0.102041	0.0241935	0.0419949	0	0.016129	1	IBC
A_14_P115870	70712030	70712089	TPH2	tryptophan hydroxylase 2	12	12q21.1	0.102041	0.0241935	0.0419949	0	0.016129	1	IBC
A_16_P19590764	70951030	70951089	LOC283392	hypothetical protein LOC283392	12	12q21.1	0.102041	0.0241935	0.0419949	0	0.016129	1	IBC
A_16_P19591767	71344354	71344413	TRHDE	thyrotropin-releasing hormone degrading enzyme	12	12q21.1	0.102041	0.0241935	0.0419949	0	0.016129	1	IBC
A_14_P105475	22955470	22955529	MYH7	myosin, heavy chain 7, cardiac muscle, beta	14	14q11.2	0.0612245	0	0.0217252	0	0	1	IBC
A_16_P20389490	6243205	6243264	A2BP1	ataxin 2-binding protein 1	16	16p13.3	0	0.0887097	0.0352717	0	0.00806452	1	nIBC
A_16_P03111950	8521759	8521818	LOC283953	Hypothetical LOC283953	16	16p13.2	0	0.0887097	0.0352717	0	0.00806452	1	nIBC
A_16_P03113554	9823257	9823316	GRIN2A	glutamate receptor, ionotropic, N-methyl D-aspartate 2A	16	16p13.2	0	0.0887097	0.0352717	0	0.00806452	1	nIBC
A_16_P03117493	12910736	12910795	LOC440338	hypothetical gene supported by AJ002784	16	16p13.12	0	0.0887097	0.0352717	0	0.00806452	1	nIBC
A_14_P126443	13949643	13949702	ERCC4	excision repair cross-complementing rodent repair deficiency, complementation group 4	16	16p13.12	0	0.0887097	0.0352717	0	0.00806452	1	nIBC
A_16_P40566292	14628590	14628649	PARN	poly(A)-specific ribonuclease (deadenylation nuclease)	16	16p13.12	0	0.0887097	0.0352717	0	0.00806452	1	nIBC
A_14_P122508	14669740	14669799	BFAR	bifunctional apoptosis regulator	16	16p13.12	0	0.0887097	0.0352717	0	0.00806452	1	nIBC
A_14_P201597	14687636	14687695	PLA2G10	phospholipase A2, group X	16	16p13.12	0	0.0887097	0.0352717	0	0.00806452	1	nIBC
A_16_P40566692	14817706	14817765	BC008178		16	16p13.11	0	0.0967742	0.020538	0	0.00806452	1	nIBC
A_16_P40566850	14876356	14876415	NOMO1		16	16p13.11	0	0.0967742	0.020538	0	0.00806452	1	nIBC
A_16_P40567252	15023021	15023080	PDXDC1	pyridoxal-dependent decarboxylase domain containing 1	16	16p13.11	0	0.0887097	0.0352717	0	0.00806452	1	nIBC
A_16_P03119862	15056457	15056516	NTAN1	N-terminal asparagine amidase	16	16p13.11	0	0.0967742	0.020538	0	0.00806452	1	nIBC
A_16_P03119889	15092192	15092251	RRN3		16	16p13.11	0	0.0967742	0.020538	0	0.00806452	1	nIBC
A_16_P03119906	15311953	15312012	AK027135		16	16p13.11	0	0.0967742	0.020538	0	0.00806452	1	nIBC
A_16_P03119925	15409130	15409189	MPV17L	MPV17 mitochondrial membrane protein-like	16	16p13.11	0	0.0967742	0.020538	0	0.00806452	1	nIBC
A_14_P128353	15584527	15584586	C16orf45	chromosome 16 open reading frame 45	16	16p13.11	0	0.0967742	0.020538	0	0.00806452	1	nIBC
A_16_P03120185	15640600	15640659	KIAA0430	KIAA0430	16	16p13.11	0	0.0967742	0.020538	0	0.00806452	1	nIBC
A_14_P109744	15723785	15723844	NDE1	nudE nuclear distribution gene E homolog 1 (A. nidulans)	16	16p13.11	0	0.0967742	0.020538	0	0.00806452	1	nIBC
A_16_P03120453	15853085	15853144	MYH11	myosin, heavy chain 11, smooth muscle	16	16p13.11	0	0.0887097	0.0352717	0	0.00806452	1	nIBC
A_16_P20412134	15885534	15885593	C16orf63	chromosome 16 open reading frame 63	16	16p13.11	0	0.0887097	0.0352717	0	0.00806452	1	nIBC
A_16_P03120765	16142967	16143026	ABCC1		16	16p13.11	0	0.0887097	0.0352717	0	0.00806452	1	nIBC
A_14_P126944	21126228	21126287	ZP2	zona pellucida glycoprotein 2 (sperm receptor)	16	16p12.2	0	0.0887097	0.0352717	0	0.00806452	1	nIBC
A_16_P03125522	21168971	21169030	ANKS4B	ankyrin repeat and sterile alpha motif domain containing 4B	16	16p12.2	0	0.0887097	0.0352717	0	0.00806452	1	nIBC
A_16_P40581807	21218700	21218759	CRYM		16	16p12.2	0	0.0887097	0.0352717	0	0.00806452	1	nIBC
A_16_P40581836	21236038	21236097	AK123760		16	16p12.2	0	0.0887097	0.0352717	0	0.00806452	1	nIBC
A_16_P03130612	25879640	25879699	HS3ST4	heparan sulfate (glucosamine) 3-O-sulfotransferase 4	16	16p12.1	0	0.0887097	0.0352717	0	0.00806452	1	nIBC
A_16_P03231628	26114650	26114709	SUZ12	suppressor of zeste 12 homolog (Drosophila)	17	17q11.2	0.102041	0.0241935	0.0419949	0.0612245	0	0.0217252	IBC
A_14_P102136	26148425	26148484	CRLF3	cytokine receptor-like factor 3	17	17q11.2	0.102041	0.0241935	0.0419949	0.0612245	0	0.0217252	IBC
A_14_P123871	35078588	35078647	PNMT	phenylethanolamine N-methyltransferase	17	17q12	0.326531	0.185484	0.0677878	0.285714	0.137097	0.0281099	IBC
A_16_P03242831	35096706	35096765	PERLD1	per1-like domain containing 1	17	17q12	0.326531	0.185484	0.0677878	0.285714	0.137097	0.0281099	IBC
A_14_P126019	35138310	35138369	ERBB2	v-erb-b2 erythroblastic leukemia viral oncogene homolog 2, neuro/glioblastoma derived oncogene homolog (avian)	17	17q12	0.326531	0.185484	0.0677878	0.285714	0.137097	0.0281099	IBC
A_14_P101724	35138973	35139032	C17orf37	chromosome 17 open reading frame 37	17	17q12	0.326531	0.185484	0.0677878	0.285714	0.137097	0.0281099	IBC
A_16_P03243168	35336158	35336217	CASC3	cancer susceptibility candidate 3	17	17q21.1	0.244898	0.145161	0.124913	0.22449	0.0967742	0.0439579	IBC
A_14_P119067	45186170	45186229	FAM117A	family with sequence similarity 117, member A	17	17q21.33	0.204082	0.0806452	0.0330494	0.0612245	0.016129	0.138465	IBC
A_16_P20668024	45259700	45259759	MYST2	MYST histone acetyltransferase 2	17	17q21.33	0.183673	0.0725806	0.0496853	0.0612245	0.016129	0.138465	IBC
A_16_P20668044	45266849	45266908	CR606231		17	17q21.33	0.183673	0.0725806	0.0496853	0.0612245	0.016129	0.138465	IBC
A_14_P125751	45278938	45278997	TAC4	tachykinin 4 (hemokinin)	17	17q21.33	0.183673	0.0725806	0.0496853	0.0612245	0.0241935	0.353133	IBC
A_16_P40841006	45629769	45629828	COL1A1	collagen, type I, alpha 1	17	17q21.33	0.22449	0.0887097	0.0222975	0.0816327	0.016129	0.0547112	IBC
A_14_P108025	45708802	45708861	TMEM92	Transmembrane protein 92	17	17q21.33	0.22449	0.0887097	0.0222975	0.0816327	0.016129	0.0547112	IBC
A_16_P40841313	45775659	45775718	XYLT2	xylosyltransferase II	17	17q21.33	0.22449	0.0887097	0.0222975	0.0816327	0.0241935	0.100851	IBC
A_14_P123434	45803848	45803907	MRPL27	mitochondrial ribosomal protein L27	17	17q21.33	0.22449	0.0806452	0.0175157	0.0816327	0.016129	0.0547112	IBC
A_14_P104142	45813569	45813628	EME1	essential meiotic endonuclease 1 homolog 1 (S. pombe)	17	17q21.33	0.22449	0.0806452	0.0175157	0.0816327	0.016129	0.0547112	IBC
A_14_P115303	45827278	45827337	LRRC59	leucine rich repeat containing 59	17	17q21.33	0.204082	0.0806452	0.0330494	0.0816327	0.016129	0.0547112	IBC
A_16_P03256711	45906857	45906916	ACSF2	acyl-CoA synthetase family member 2	17	17q21.33	0.204082	0.0806452	0.0330494	0.0816327	0.016129	0.0547112	IBC
A_16_P03256725	45918236	45918295	RSAD1	radical S-adenosyl methionine domain containing 1	17	17q21.33	0.204082	0.0806452	0.0330494	0.0816327	0.016129	0.0547112	IBC
A_16_P40841844	45962192	45962251	MYCBPAP	MYCBP associated protein	17	17q21.33	0.204082	0.0806452	0.0330494	0.0816327	0.016129	0.0547112	IBC
A_14_P105416	45966329	45966388	EPN3	epsin 3	17	17q21.33	0.204082	0.0806452	0.0330494	0.0816327	0.016129	0.0547112	IBC
A_16_P03257048	46119536	46119595	ABCC3	ATP-binding cassette, sub-family C (CFTR/MRP), member 3	17	17q21.33	0.244898	0.0967742	0.0152247	0.102041	0.0241935	0.0419949	IBC
A_14_P108134	46137552	46137611	ANKRD40		17	17q21.33	0.244898	0.0967742	0.0152247	0.102041	0.0241935	0.0419949	IBC
A_16_P20670363	46155432	46155491	CROP	cisplatin resistance-associated overexpressed protein	17	17q21.33	0.265306	0.112903	0.019177	0.102041	0.0241935	0.0419949	IBC
A_14_P110037	46196405	46196464	C17orf73	chromosome 17 open reading frame 73	17	17q21.33	0.265306	0.0967742	0.00753245	0.102041	0.016129	0.0201062	IBC
A_16_P03257248	46274038	46274097	WFIKKN2	WAP, follistatin/kazal, immunoglobulin, kunitz and netrin domain containing 2	17	17q21.33	0.265306	0.0887097	0.00582191	0.102041	0.0241935	0.0419949	IBC
A_14_P124682	46296256	46296315	TOB1	transducer of ERBB2, 1	17	17q21.33	0.244898	0.0887097	0.0113974	0.0816327	0.0241935	0.100851	IBC
A_16_P20671355	46548759	46548818	SPAG9		17	17q21.33	0.22449	0.0967742	0.0439579	0.0816327	0.016129	0.0547112	IBC
A_14_P137122	46592316	46592375	NME1	non-metastatic cells 1, protein (NM23A) expressed in	17	17q21.33	0.22449	0.0967742	0.0439579	0.0612245	0.016129	0.138465	IBC
A_14_P105391	46599943	46600002	NME2	non-metastatic cells 2, protein (NM23B) expressed in	17	17q21.33	0.22449	0.0967742	0.0439579	0.0612245	0.016129	0.138465	IBC
A_16_P20671478	46605017	46605076	MBTD1	mbt domain containing 1	17	17q21.33	0.22449	0.0967742	0.0439579	0.0612245	0.016129	0.138465	IBC
A_16_P03257818	46668543	46668602	BC034364	Homo sapiens, clone IMAGE:4723759, mRNA	17	17q21.33	0.22449	0.0967742	0.0439579	0.0612245	0.00806452	0.0692652	IBC
A_16_P03257910	46765663	46765722	BC039326	CDNA clone IMAGE:5267259	17	17q21.33	0.204082	0.0967742	0.0752246	0.0816327	0.00806452	0.0231317	IBC
A_16_P03257915	46770017	46770076	FLJ42842		17	17q21.33	0.204082	0.0967742	0.0752246	0.0816327	0.00806452	0.0231317	IBC
A_16_P03258075	46875527	46875586	AK126827		17	17q21.33	0.204082	0.0967742	0.0752246	0.0816327	0.00806452	0.0231317	IBC
A_16_P20672639	47133998	47134057	CA10	carbonic anhydrase X	17	17q21.33	0.204082	0.120968	0.228647	0.0816327	0.00806452	0.0231317	IBC
A_14_P112338	49257518	49257577	KIF2B	kinesin family member 2B	17	17q22	0.22449	0.0887097	0.0222975	0.0204082	0	0.283237	IBC
A_14_P104871	56682118	56682177	BCAS3	breast carcinoma amplified sequence 3	17	17q23.2	0.244898	0.112903	0.0351885	0.0204082	0.016129	1	IBC
A_16_P03271437	56838776	56838835	TBX2	T-box 2	17	17q23.2	0.22449	0.0887097	0.0222975	0.0204082	0.00806452	0.487431	IBC
A_16_P03271445	56842166	56842225	C17orf82	chromosome 17 open reading frame 82	17	17q23.2	0.22449	0.0887097	0.0222975	0.0204082	0.00806452	0.487431	IBC
A_14_P114800	56915827	56915886	TBX4	T-box 4	17	17q23.2	0.22449	0.0887097	0.0222975	0.0408163	0.00806452	0.193678	IBC
A_14_P113278	57019511	57019570	NACA2	nascent polypeptide-associated complex alpha subunit 2	17	17q23.2	0.22449	0.0887097	0.0222975	0.0408163	0.00806452	0.193678	IBC
A_16_P20696134	57291907	57291966	BRIP1	BRCA1 interacting protein C-terminal helicase 1	17	17q23.2	0.22449	0.0967742	0.0439579	0.0408163	0.00806452	0.193678	IBC
A_16_P20696153	57298166	57298225	INTS2	integrator complex subunit 2	17	17q23.2	0.22449	0.0967742	0.0439579	0.0408163	0.00806452	0.193678	IBC
A_16_P20696573	57488145	57488204	MED13	mediator complex subunit 13	17	17q23.2	0.22449	0.0967742	0.0439579	0.0408163	0.00806452	0.193678	IBC
A_16_P03276155	60654236	60654295	RGS9	regulator of G-protein signaling 9	17	17q24.1	0.183673	0.0887097	0.110876	0.0816327	0	0.00587859	IBC
A_14_P131421	60984581	60984640	AXIN2	axin 2 (conductin, axil)	17	17q24.1	0.183673	0.0887097	0.110876	0.0612245	0	0.0217252	IBC
A_16_P03276821	61092600	61092659	CCDC46	coiled-coil domain containing 46	17	17q24.1	0.204082	0.0806452	0.0330494	0.0612245	0.00806452	0.0692652	IBC
A_16_P03277501	61652577	61652636	APOH	Apolipoprotein H (beta-2-glycoprotein I)	17	17q24.2	0.183673	0.104839	0.204634	0.0816327	0.00806452	0.0231317	IBC
A_16_P40956415	12642172	12642231	SPIRE1	CDNA FLJ38302 fis, clone FCBBF3017681	18	18p11.21	0.0612245	0.016129	0.138465	0.0612245	0	0.0217252	IBC
A_16_P03319733	12687310	12687369	CEP76	centrosomal protein 76kDa	18	18p11.21	0.0612245	0.016129	0.138465	0.0612245	0	0.0217252	IBC
A_16_P03319765	12714565	12714624	PSMG2	proteasome (prosome, macropain) assembly chaperone 2	18	18p11.21	0.0612245	0.016129	0.138465	0.0612245	0	0.0217252	IBC
A_16_P20780109	12869720	12869779	PTPN2	protein tyrosine phosphatase, non-receptor type 2	18	18p11.21	0.0612245	0.016129	0.138465	0.0612245	0	0.0217252	IBC
A_16_P03320077	12974124	12974183	SEH1L	SEH1-like (S. cerevisiae)	18	18p11.21	0.0612245	0.016129	0.138465	0.0612245	0	0.0217252	IBC
A_16_P03320107	12989859	12989918	AK096548		18	18p11.21	0.0612245	0.016129	0.138465	0.0612245	0	0.0217252	IBC
A_14_P202294	13063038	13063097	Cep192		18	18p11.21	0.0612245	0.016129	0.138465	0.0612245	0	0.0217252	IBC
A_16_P20780642	13114400	13114459	CEP192	centrosomal protein 192kDa	18	18p11.21	0.0612245	0.016129	0.138465	0.0612245	0	0.0217252	IBC
A_16_P20780805	13196071	13196130	BC041855	CDNA clone IMAGE:5270453	18	18p11.21	0.0612245	0.0241935	0.353133	0.0612245	0	0.0217252	IBC
A_14_P119388	13642184	13642243	C18orf1	chromosome 18 open reading frame 1	18	18p11.21	0.0612245	0.016129	0.138465	0.0612245	0	0.0217252	IBC
A_16_P20782191	13705800	13705859	C18orf19		18	18p11.21	0.0612245	0.016129	0.138465	0.0612245	0	0.0217252	IBC
A_14_P101823	13752250	13752309	RNMT	RNA (guanine-7-) methyltransferase	18	18p11.21	0.0612245	0.016129	0.138465	0.0612245	0	0.0217252	IBC
A_14_P200504	13816044	13816103	MC5R	melanocortin 5 receptor	18	18p11.21	0.0612245	0.016129	0.138465	0.0612245	0	0.0217252	IBC
A_16_P40959431	13861404	13861463	MC2R	melanocortin 2 receptor (adrenocorticotropic hormone)	18	18p11.21	0.0612245	0.016129	0.138465	0.0612245	0	0.0217252	IBC
A_16_P20955284	9269193	9269252	AK095463		19	19p13.2	0.0612245	0	0.0217252	0.0408163	0	0.0790429	IBC
A_16_P41137489	9275927	9275986	BC109267		19	19p13.2	0.0612245	0	0.0217252	0.0408163	0	0.0790429	IBC
A_14_P128156	9313616	9313675	ZNF559	zinc finger protein 559	19	19p13.2	0.0612245	0	0.0217252	0.0408163	0	0.0790429	IBC
A_16_P21132625	39160280	39160339	TOP1	topoisomerase (DNA) I	20	20q12	0.102041	0.0241935	0.0419949	0	0	1	IBC
