# Supplementary material for: High-Resolution Comparative Genomic Hybridization of Inflammatory Breast Cancer and Identification of Candidate Genes
Source: PLoS One. 2011 Feb 9;6(2):e16950. doi: 10.1371/journal.pone.0016950 (PMC3037286; doi:10.1371/journal.pone.0016950)
Supplement: Table S8 — Correlation between DNA CNAs and RNA expression for the 13,127 genes present on both platforms, in IBCs, and in nIBCs. (XLS) [file pone.0016950.s012.xls]

## Sheet: Table S8
Table S8: Correlation between DNA CNAs and RNA expression for the 13.127 genes present on both platforms in IBCs, and in nIBCs
ProbeName	ChrName	Cytoband	Symbol	Name	IBCs							nIBCs
					Correlation Gain & Up (p t.test)	Correlation Amp & Up (p t.test)	Correlation Loss & Down (p t.test)	Correlation Del & Down (p t.test)	Presence of CNA in at least 2 IBCs	Correlation (Gain and/or Amp) & Up	Correlation (Loss and/or Del) & Down	Correlation Gain & Up (p t.test)	Correlation Amp & Up (p t.test)	Correlation Loss & Down (p t.test)	Correlation Del & Down (p t.test)	Presence of CNA in at least 2 nIBCs	Correlation (Gain and/or Amp) & Up	Correlation (Loss and/or Del) & Down
A_16_P00000021	1	1p36.33	LOC643837	hypothetical protein LOC643837					no							no
A_16_P15001594	1	1p36.33	FLJ39609	Hypothetical protein FLJ39609					no							yes
A_16_P15001666	1	1p36.33	SAMD11	sterile alpha motif domain containing 11					no							yes
A_16_P00000127	1	1p36.33	NOC2L	nucleolar complex associated 2 homolog (S. cerevisiae)					no							yes
A_16_P15001756	1	1p36.33	KLHL17	kelch-like 17 (Drosophila)					no							yes
A_16_P15001775	1	1p36.33	PLEKHN1	pleckstrin homology domain containing, family N member 1					no							yes
A_16_P00000195	1	1p36.33	HES4	hairy and enhancer of split 4 (Drosophila)					no							no
A_16_P15001886	1	1p36.33	ISG15	ISG15 ubiquitin-like modifier					no							no
A_16_P00000289	1	1p36.33	chr1:001032694-001032753	Clone L48 polyadenylated HERV LTR sequence and flanking cellular sequence, mRNA					no							yes
A_16_P00000311	1	1p36.33	C1orf159	chromosome 1 open reading frame 159					no							yes
A_16_P00000434	1	1p36.33	chr1:001142438-001142485	---					no							yes
A_16_P15002418	1	1p36.33	TNFRSF18	tumor necrosis factor receptor superfamily, member 18					no					0.000378196	0.000724928	yes		Loss/Del
A_16_P00000486	1	1p36.33	TNFRSF4	tumor necrosis factor receptor superfamily, member 4					no							yes
A_14_P122641	1	1p36.33	SDF4	stromal cell derived factor 4					no							yes
A_16_P15002534	1	1p36.33	B3GALT6	UDP-Gal:betaGal beta 1,3-galactosyltransferase polypeptide 6					no							yes
A_16_P00000572	1	1p36.33	UBE2J2	ubiquitin-conjugating enzyme E2, J2 (UBC6 homolog, yeast)					no							yes
A_16_P35003440	1	1p36.33	hCG_20426	hCG20426					no							no
A_16_P15003246	1	1p36.33	ATAD3A	ATPase family, AAA domain containing 3A					no							no
A_16_P00000700	1	1p36.33	SSU72	SSU72 RNA polymerase II CTD phosphatase homolog (S. cerevisiae)					no							no
A_16_P00000754	1	1p36.33	CDC2L2	cell division cycle 2-like 2 (PITSLRE proteins)					no							no
A_16_P15003630	1	1p36.33	NADK	NAD kinase					no							no
A_14_P122741	1	1p36.33	GNB1	guanine nucleotide binding protein (G protein), beta polypeptide 1					no							no
A_16_P00000942	1	1p36.33	TMEM52	transmembrane protein 52					no							no
A_16_P00000950	1	1p36.33	LOC339457	hypothetical protein LOC339457					no							no
A_16_P00000983	1	1p36.33	KIAA1751	KIAA1751					no							no
A_16_P00001098	1	1p36.33	PRKCZ	protein kinase C, zeta					no							no
A_16_P00001336	1	1p36.33	C1orf86	chromosome 1 open reading frame 86					no							no
A_16_P15004785	1	1p36.33	SKI	v-ski sarcoma viral oncogene homolog (avian)					no							no
A_14_P105772	1	1p36.32	RER1	RER1 retention in endoplasmic reticulum 1 homolog (S. cerevisiae)					no							no
A_14_P132953	1	1p36.32	PEX10	peroxisome biogenesis factor 10					no							no
A_16_P00001827	1	1p36.32	PLCH2	phospholipase C, eta 2					no							no
A_16_P00001853	1	1p36.32	PANK4	pantothenate kinase 4					no							no
A_16_P00001928	1	1p36.32	LOC115110	hypothetical protein LOC115110					no							no
A_14_P130946	1	1p36.32	TNFRSF14	tumor necrosis factor receptor superfamily, member 14 (herpesvirus entry mediator)					no							no
A_16_P00001962	1	1p36.32	C1orf93	chromosome 1 open reading frame 93					no							no
A_16_P00001986	1	1p36.32	MMEL1	membrane metallo-endopeptidase-like 1					no							no
A_14_P118408	1	1p36.32	TLR5	toll-like receptor 5					no							no
A_16_P15008475	1	1p36.32	ARHGEF16	Rho guanine exchange factor (GEF) 16					no							no
A_16_P00003327	1	1p36.32	MEGF6	multiple EGF-like-domains 6					no					0.0266091		yes		Loss
A_16_P00003567	1	1p36.32	FAM79A	family with sequence similarity 79, member A					no							yes
A_16_P00003595	1	1p36.32	WDR8	WD repeat domain 8					no							no
A_16_P15009475	1	1p36.32	LRRC47	leucine rich repeat containing 47					no							no
A_16_P15009537	1	1p36.32	KIAA0562	KIAA0562					no							no
A_14_P106949	1	1p36.32	DFFB	DNA fragmentation factor, 40kDa, beta polypeptide (caspase-activated DNase)					no							no
A_16_P15009761	1	1p36.32	C1orf174	chromosome 1 open reading frame 174					no							no
A_14_P200705	1	1p36.31	NPHP4	nephronophthisis 4					no							no
A_14_P128234	1	1p36.31	KCNAB2	potassium voltage-gated channel, shaker-related subfamily, beta member 2					no							no
A_16_P15015270	1	1p36.31	RPL22	ribosomal protein L22					no							no
A_16_P00007281	1	1p36.31	RNF207	ring finger protein 207					no							no
A_16_P15015418	1	1p36.31	GPR153	G protein-coupled receptor 153					no							no
A_16_P15015457	1	1p36.31	ACOT7	acyl-CoA thioesterase 7					no							no
A_16_P00007588	1	1p36.31	ESPN	espin					no							no
A_16_P35017106	1	1p36.31	PLEKHG5	pleckstrin homology domain containing, family G (with RhoGef domain) member 5					no							no
A_14_P122977	1	1p36.31	NOL9	nucleolar protein 9					no							no
A_14_P138039	1	1p36.31	ZBTB48	zinc finger and BTB domain containing 48					no							no
A_14_P124673	1	1p36.31	KLHL21	kelch-like 21 (Drosophila)					no							no
A_16_P00007806	1	1p36.31	PHF13	PHD finger protein 13					no							no
A_16_P00007829	1	1p36.31	THAP3	THAP domain containing, apoptosis associated protein 3					no							no
A_14_P200002	1	1p36.31	DNAJC11	DnaJ (Hsp40) homolog, subfamily C, member 11					no							no
A_16_P15016721	1	1p36.31	chr1:006766728-006766787	Transcribed locus, moderately similar to XP_530247.1 PREDICTED: hypothetical protein XP_530247 [Pan troglodytes]					no							no
A_16_P15016755	1	1p36.31	CAMTA1	calmodulin binding transcription activator 1					no							no
A_14_P201873	1	1p36.23	VAMP3	vesicle-associated membrane protein 3 (cellubrevin)					no							no
A_16_P15019443	1	1p36.23	PER3	period homolog 3 (Drosophila)					no							no
A_16_P35020923	1	1p36.23	PARK7	Parkinson disease (autosomal recessive, early onset) 7					no							no
A_16_P00009866	1	1p36.23	ERRFI1	ERBB receptor feedback inhibitor 1					no							no
A_14_P102924	1	1p36.23	RERE	arginine-glutamic acid dipeptide (RE) repeats					no							no
A_16_P15021923	1	1p36.23	ENO1	enolase 1, (alpha)					no							no
A_16_P15022123	1	1p36.23	CA6	carbonic anhydrase VI					no							no
A_14_P104356	1	1p36.22	SLC2A5	solute carrier family 2 (facilitated glucose/fructose transporter), member 5					no							no
A_16_P00011321	1	1p36.22	GPR157	G protein-coupled receptor 157					no							no
A_16_P15022494	1	1p36.22	chr1:009139246-009139300	MicroRNA 34a (MIRN34A) precursor RNA, complete sequence					no							no
A_16_P00011562	1	1p36.22	H6PD	hexose-6-phosphate dehydrogenase (glucose 1-dehydrogenase)					no							no
A_16_P15022887	1	1p36.22	SPSB1	splA/ryanodine receptor domain and SOCS box containing 1					no							no
A_16_P35024792	1	1p36.22	SLC25A33	solute carrier family 25, member 33					no							no
A_16_P00012014	1	1p36.22	TMEM201	transmembrane protein 201					no							no
A_16_P00012078	1	1p36.22	PIK3CD	phosphoinositide-3-kinase, catalytic, delta polypeptide					no							no
A_16_P00012170	1	1p36.22	CLSTN1	calsyntenin 1					no							no
A_16_P15024185	1	1p36.22	CTNNBIP1	catenin, beta interacting protein 1					no							no
A_16_P00012435	1	1p36.22	chr1:009918519-009918578	Full-length cDNA clone CS0DD009YD14 of Neuroblastoma Cot 50-normalized of Homo sapiens (human)					no							no
A_14_P105463	1	1p36.22	LZIC	Leucine zipper and CTNNBIP1 domain containing					no							no
A_16_P00012486	1	1p36.22	NMNAT1	nicotinamide nucleotide adenylyltransferase 1					no							no
A_16_P15024502	1	1p36.22	RBP7	retinol binding protein 7, cellular					no							no
A_16_P15024551	1	1p36.22	UBE4B	ubiquitination factor E4B (UFD2 homolog, yeast)					no							no
A_16_P35026539	1	1p36.22	KIF1B	kinesin family member 1B					no							no
A_16_P15025453	1	1p36.22	PGD	phosphogluconate dehydrogenase					no							no
A_16_P00013104	1	1p36.22	APITD1	apoptosis-inducing, TAF9-like domain 1					no							no
A_16_P15025579	1	1p36.22	chr1:010450719-010450775	CDNA FLJ12540 fis, clone NT2RM4000425					no							no
A_14_P134388	1	1p36.22	DFFA	DNA fragmentation factor, 45kDa, alpha polypeptide					no							no
A_16_P15025870	1	1p36.22	PEX14	peroxisomal biogenesis factor 14					no							no
A_16_P00013420	1	1p36.22	CASZ1	castor zinc finger 1					no							no
A_16_P15026328	1	1p36.22	AK092289	CDNA FLJ11928 fis, clone HEMBB1000420					no							no
A_16_P35028544	1	1p36.22	TARDBP	TAR DNA binding protein					no							no
A_14_P104235	1	1p36.22	SRM	spermidine synthase					no							no
A_16_P15027148	1	1p36.22	EXOSC10	exosome component 10					no							no
A_16_P15027235	1	1p36.22	FRAP1	FK506 binding protein 12-rapamycin associated protein 1					no							no
A_16_P15027650	1	1p36.22	UBIAD1	UbiA prenyltransferase domain containing 1					no							no
A_16_P35029639	1	1p36.22	chr1:011436430-011436489	---					no							no
A_16_P15028244	1	1p36.22	PTCHD2	patched domain containing 2					no							no
A_16_P15028567	1	1p36.22	FBXO44	F-box protein 44					no							no
A_16_P15028588	1	1p36.22	FBXO6	F-box protein 6					no							no
A_14_P137142	1	1p36.22	MAD2L2	MAD2 mitotic arrest deficient-like 2 (yeast)					no							no
A_16_P00014987	1	1p36.22	AGTRAP	angiotensin II receptor-associated protein					no							no
A_16_P15028884	1	1p36.22	MTHFR	5,10-methylenetetrahydrofolate reductase (NADPH)					no							no
A_14_P139194	1	1p36.22	CLCN6	chloride channel 6					no							no
A_14_P139620	1	1p36.22	NPPA	natriuretic peptide precursor A					no							no
A_16_P15029206	1	1p36.22	KIAA2013	KIAA2013					no							no
A_16_P00015254	1	1p36.22	PLOD1	procollagen-lysine 1, 2-oxoglutarate 5-dioxygenase 1					no							no
A_16_P00015319	1	1p36.22	MFN2	mitofusin 2					no							no
A_14_P115034	1	1p36.22	RP5-1077B9.4	invasion inhibitory protein 45					no							no
A_16_P00015512	1	1p36.22	TNFRSF1B	tumor necrosis factor receptor superfamily, member 1B					no							no
A_16_P00015828	1	1p36.21	VPS13D	vacuolar protein sorting 13 homolog D (S. cerevisiae)					no							no
A_16_P00016149	1	1p36.21	DHRS3	dehydrogenase/reductase (SDR family) member 3					no							no
A_16_P15032824	1	1p36.21	PDPN	podoplanin					no							no
A_16_P15033093	1	1p36.21	PRDM2	PR domain containing 2, with ZNF domain					no							no
A_16_P15034733	1	1p36.21	chr1:014468636-014468695	CDNA: FLJ22631 fis, clone HSI06451					no							no
A_16_P15035217	1	1p36.21	RP1-21O18.1	kazrin					no							no
A_14_P200630	1	1p36.21	chr1:15188827-15188883	kazrin					no							no
A_16_P15036764	1	1p36.21	TMEM51	transmembrane protein 51					no							no
A_16_P15037413	1	1p36.21	EFHD2	EF-hand domain family, member D2					no							no
A_14_P121733	1	1p36.21	CASP9	caspase 9, apoptosis-related cysteine peptidase					no							no
A_16_P35039905	1	1p36.13	DNAJC16	DnaJ (Hsp40) homolog, subfamily C, member 16					no							no
A_16_P15038010	1	1p36.13	RSC1A1	regulatory solute carrier protein, family 1, member 1					no							no
A_16_P00019680	1	1p36.13	PLEKHM2	pleckstrin homology domain containing, family M (with RUN domain) member 2					no							no
A_16_P00019769	1	1p36.13	SLC25A34	solute carrier family 25, member 34					no							no
A_16_P00019786	1	1p36.13	FBLIM1	filamin binding LIM protein 1					no							no
A_14_P120097	1	1p36.13	SPEN	spen homolog, transcriptional regulator (Drosophila)					no							no
A_16_P35040982	1	1p36.13	ZBTB17	zinc finger and BTB domain containing 17					no							no
A_16_P00020100	1	1p36.13	C1orf64	chromosome 1 open reading frame 64					no							no
A_16_P00020115	1	1p36.13	HSPB7	heat shock 27kDa protein family, member 7 (cardiovascular)					no							no
A_16_P15039128	1	1p36.13	chr1:016169550-016169604	Transcribed locus					no							no
A_14_P103457	1	1p36.13	EPHA2	EPH receptor A2					no							no
A_16_P15039352	1	1p36.13	ARHGEF19	Rho guanine nucleotide exchange factor (GEF) 19					no							no
A_16_P15039434	1	1p36.13	chr1:016299910-016299968	---					no							no
A_16_P35041867	1	1p36.13	FBXO42	F-box protein 42					no							no
A_14_P112838	1	1p36.13	C1orf144	chromosome 1 open reading frame 144					no							no
A_16_P00020635	1	1p36.13	SPATA21	spermatogenesis associated 21					no							no
A_14_P125300	1	1p36.13	NECAP2	NECAP endocytosis associated 2					no							no
A_16_P35042521	1	1p36.13	NBPF1	neuroblastoma breakpoint family, member 1					no							no
A_14_P114287	1	1p36.13	CROCCL1	ciliary rootlet coiled-coil, rootletin-like 1					no							no
A_16_P00020795	1	1p36.13	LOC729604	hypothetical protein LOC729604					no							no
A_16_P15041092	1	1p36.13	CROCC	ciliary rootlet coiled-coil, rootletin					no							no
A_14_P101297	1	1p36.13	MFAP2	microfibrillar-associated protein 2					no							no
A_16_P00020872	1	1p36.13	ATP13A2	ATPase type 13A2					no							no
A_14_P119681	1	1p36.13	SDHB	succinate dehydrogenase complex, subunit B, iron sulfur (Ip)					no							no
A_16_P00020979	1	1p36.13	PADI2	peptidyl arginine deiminase, type II					no							no
A_14_P200006	1	1p36.13	PADI3	peptidyl arginine deiminase, type III					no							no
A_14_P137516	1	1p36.13	RCC2	regulator of chromosome condensation 2					no							no
A_16_P00021759	1	1p36.13	ARHGEF10L	Rho guanine nucleotide exchange factor (GEF) 10-like					no							no
A_14_P102150	1	1p36.13	ACTL8	actin-like 8					no							no
A_16_P15043915	1	1p36.13	IGSF21	immunoglobin superfamily, member 21					no							no
A_16_P00023401	1	1p36.13	LOC284530	hypothetical protein LOC284530					no							no
A_16_P15045924	1	1p36.13	ALDH4A1	aldehyde dehydrogenase 4 family, member A1					no							no
A_16_P00023649	1	1p36.13	LOC126917	hypothetical protein LOC126917					no							no
A_14_P110357	1	1p36.13	UBR4	ubiquitin protein ligase E3 component n-recognin 4					no							no
A_16_P00024174	1	1p36.13	LOC284513	hypothetical protein LOC284513					no							no
A_14_P116238	1	1p36.13	KIAA0090	KIAA0090					no							no
A_14_P127505	1	1p36.13	MRTO4	mRNA turnover 4 homolog (S. cerevisiae)					no							no
A_16_P35049880	1	1p36.13	AKR7A3	aldo-keto reductase family 7, member A3 (aflatoxin aldehyde reductase)					no							no
A_16_P00024283	1	1p36.13	AKR7A2	aldo-keto reductase family 7, member A2 (aflatoxin aldehyde reductase)					no							no
A_14_P107476	1	1p36.13	CAPZB	capping protein (actin filament) muscle Z-line, beta					no							no
A_16_P15047760	1	1p36.13	C1orf151	chromosome 1 open reading frame 151					no							no
A_14_P103411	1	1p36.13	NBL1	neuroblastoma, suppression of tumorigenicity 1					no							no
A_16_P00024829	1	1p36.13	TMCO4	transmembrane and coiled-coil domains 4					no							no
A_16_P15048465	1	1p36.13	OTUD3	OTU domain containing 3					no							no
A_16_P15048622	1	1p36.13	PLA2G2A	phospholipase A2, group IIA (platelets, synovial fluid)					no							no
A_16_P15048786	1	1p36.13	PLA2G2D	phospholipase A2, group IID					no							no
A_16_P00025394	1	1p36.12	chr1:020253049-020253108	Transcribed locus					no							no
A_14_P120816	1	1p36.12	UBXD3	UBX domain containing 3					no							no
A_16_P15049699	1	1p36.12	CAMK2N1	calcium/calmodulin-dependent protein kinase II inhibitor 1					no							no
A_16_P15049760	1	1p36.12	C1orf166	chromosome 1 open reading frame 166					no							no
A_16_P00025938	1	1p36.12	FAM43B	family with sequence similarity 43, member B					no							no
A_16_P35053041	1	1p36.12	PINK1	PTEN induced putative kinase 1					no							no
A_14_P109945	1	1p36.12	DDOST	dolichyl-diphosphooligosaccharide-protein glycosyltransferase					no							no
A_16_P00026184	1	1p36.12	HP1BP3	heterochromatin protein 1, binding protein 3					no							no
A_16_P15050470	1	1p36.12	EIF4G3	eukaryotic translation initiation factor 4 gamma, 3					no							no
A_16_P00026850	1	1p36.12	ECE1	endothelin converting enzyme 1					no							no
A_16_P35055044	1	1p36.12	NBPF3	neuroblastoma breakpoint family, member 3					no							no
A_14_P116991	1	1p36.12	ALPL	alkaline phosphatase, liver/bone/kidney					no							no
A_16_P00027260	1	1p36.12	RAP1GAP	RAP1 GTPase activating protein					no							no
A_16_P35055877	1	1p36.12	USP48	ubiquitin specific peptidase 48					no							no
A_16_P00027573	1	1p36.12	HSPG2	heparan sulfate proteoglycan 2					no							no
A_14_P124604	1	1p36.12	HSPC157	HSPC157 protein					no							no
A_16_P00027831	1	1p36.12	CDC42	cell division cycle 42 (GTP binding protein, 25kDa)					no							no
A_16_P00027958	1	1p36.12	WNT4	wingless-type MMTV integration site family, member 4					no							no
A_16_P00028517	1	1p36.12	ZBTB40	zinc finger and BTB domain containing 40					no							no
A_16_P15054916	1	1p36.12	C1QA	complement component 1, q subcomponent, A chain					no							no
A_16_P00028735	1	1p36.12	C1QC	complement component 1, q subcomponent, C chain					no							no
A_14_P126789	1	1p36.12	C1QB	complement component 1, q subcomponent, B chain					no							no
A_16_P00028818	1	1p36.12	EPHB2	EPH receptor B2					no							no
A_16_P15055796	1	1p36.12	AOF2	amine oxidase (flavin containing) domain 2					no							no
A_14_P101868	1	1p36.12	LUZP1	leucine zipper protein 1					no							no
A_16_P15056383	1	1p36.12	chr1:023322196-023322255	MRNA; cDNA DKFZp686B0610 (from clone DKFZp686B0610)					no							no
A_14_P124156	1	1p36.12	HNRNPR	heterogeneous nuclear ribonucleoprotein R					no							no
A_16_P00029743	1	1p36.12	ZNF436	zinc finger protein 436					no							no
A_16_P15056684	1	1p36.12	TCEA3	transcription elongation factor A (SII), 3					no							no
A_16_P00029848	1	1p36.12	DDEFL1	development and differentiation enhancing factor-like 1					no							no
A_16_P00029939	1	1p36.12	E2F2	E2F transcription factor 2					no							no
A_16_P15057075	1	1p36.12	ID3	inhibitor of DNA binding 3, dominant negative helix-loop-helix protein					no							no
A_16_P15057365	1	1p36.11	RPL11	ribosomal protein L11					no							no
A_14_P124391	1	1p36.11	RP5-886K2.1	neuronal thread protein AD7c-NTP					no							no
A_16_P35061045	1	1p36.11	TCEB3	Gene from PAC 886K2, chromosome 1					no							no
A_14_P200010	1	1p36.11	C1orf128	chromosome 1 open reading frame 128					no							no
A_14_P121418	1	1p36.11	LYPLA2	lysophospholipase II					no							no
A_16_P00030291	1	1p36.11	GALE	UDP-galactose-4-epimerase					no							no
A_16_P35061187	1	1p36.11	HMGCL	3-hydroxymethyl-3-methylglutaryl-Coenzyme A lyase (hydroxymethylglutaricaciduria)					no							no
A_16_P15057874	1	1p36.11	PNRC2	proline-rich nuclear receptor coactivator 2					no							no
A_16_P00030447	1	1p36.11	FUSIP1	FUS interacting protein (serine/arginine-rich) 1					no							no
A_16_P00030608	1	1p36.11	IL28RA	interleukin 28 receptor, alpha (interferon, lambda receptor)					no							no
A_14_P113165	1	1p36.11	C1orf201	chromosome 1 open reading frame 201					no							no
A_16_P00031065	1	1p36.11	NPAL3	NIPA-like domain containing 3					no							no
A_16_P15059457	1	1p36.11	SRRM1	serine/arginine repetitive matrix 1					no							no
A_16_P00031383	1	1p36.11	CLIC4	chloride intracellular channel 4					no							no
A_16_P15060014	1	1p36.11	RUNX3	runt-related transcription factor 3					no							no
A_16_P00031902	1	1p36.11	LOC391020	interferon induced transmembrane protein pseudogene					no							no
A_16_P15060840	1	1p36.11	SYF2	SYF2 homolog, RNA splicing factor (S. cerevisiae)					no							no
A_16_P15060880	1	1p36.11	C1orf63	chromosome 1 open reading frame 63					no							no
A_16_P00032102	1	1p36.11	TMEM50A	transmembrane protein 50A					no							no
A_16_P15061371	1	1p36.11	LDLRAP1	low density lipoprotein receptor adaptor protein 1					no							no
A_16_P15061480	1	1p36.11	MAN1C1	mannosidase, alpha, class 1C, member 1					no							no
A_16_P15061928	1	1p36.11	SEPN1	selenoprotein N, 1					no							no
A_16_P15062022	1	1p36.11	FAM54B	family with sequence similarity 54, member B					no							no
A_16_P00032599	1	1p36.11	C1orf135	chromosome 1 open reading frame 135					no							no
A_16_P00032658	1	1p36.11	STMN1	stathmin 1/oncoprotein 18					no							no
A_16_P00032716	1	1p36.11	PAFAH2	platelet-activating factor acetylhydrolase 2, 40kDa					no							no
A_16_P15062439	1	1p36.11	EXTL1	exostoses (multiple)-like 1					no							no
A_14_P110541	1	1p36.11	SLC30A2	solute carrier family 30 (zinc transporter), member 2					no							no
A_16_P15062668	1	1p36.11	PDIK1L	PDLIM1 interacting kinase 1 like					no							no
A_16_P00032960	1	1p36.11	GRRP1	glycine/arginine rich protein 1					no							no
A_16_P15062770	1	1p36.11	ZNF593	zinc finger protein 593					no							no
A_16_P15062782	1	1p36.11	CNKSR1	connector enhancer of kinase suppressor of Ras 1					no							no
A_16_P15062937	1	1p36.11	CCDC21	coiled-coil domain containing 21					no							no
A_14_P127716	1	1p36.11	SH3BGRL3	SH3 domain binding glutamic acid-rich protein like 3					no							no
A_16_P15063094	1	1p36.11	UBXD5	UBX domain containing 5					no							no
A_16_P15063162	1	1p36.11	CD52	CD52 molecule					no							no
A_16_P00033279	1	1p36.11	ZNF683	zinc finger protein 683					no							no
A_16_P00033332	1	1p36.11	LIN28	lin-28 homolog (C. elegans)					no							no
A_14_P139782	1	1p36.11	DHDDS	dehydrodolichyl diphosphate synthase					no							no
A_14_P101569	1	1p36.11	HMGN2	high-mobility group nucleosomal binding domain 2					no							no
A_16_P00033457	1	1p36.11	RPS6KA1	ribosomal protein S6 kinase, 90kDa, polypeptide 1					no							no
A_14_P114927	1	1p36.11	ARID1A	AT rich interactive domain 1A (SWI-like)					no							no
A_16_P00033794	1	1p36.11	PIGV	phosphatidylinositol glycan anchor biosynthesis, class V					no							no
A_14_P133833	1	1p36.11	SFN	stratifin					no							no
A_16_P00033877	1	1p36.11	chr1:26880758-26880817	CDNA FLJ42803 fis, clone BRCAN2002826					no							no
A_16_P15064377	1	1p36.11	ATPBD1B	ATP binding domain 1 family, member B					no							no
A_16_P15064409	1	1p36.11	GPATCH3	G patch domain containing 3					no							no
A_16_P15064468	1	1p36.11	NUDC	nuclear distribution gene C homolog (A. nidulans)					no							no
A_14_P114313	1	1p36.11	C1orf172	chromosome 1 open reading frame 172					no							no
A_16_P00034019	1	1p36.11	LOC388610	hypothetical LOC388610					no							no
A_16_P00034027	1	1p36.11	FAM46B	family with sequence similarity 46, member B					no							no
A_16_P15064774	1	1p36.11	SLC9A1	solute carrier family 9 (sodium/hydrogen exchanger), member 1 (antiporter, Na+/H+, amiloride sensitive)					no							no
A_14_P127580	1	1p36.11	WDTC1	WD and tetratricopeptide repeats 1					no							no
A_16_P00034324	1	1p36.11	C1orf160	chromosome 1 open reading frame 160					no							no
A_14_P101435	1	1p36.11	SYTL1	synaptotagmin-like 1					no							no
A_16_P00034382	1	1p36.11	MAP3K6	mitogen-activated protein kinase kinase kinase 6					no							no
A_16_P00034464	1	1p36.11	WASF2	WAS protein family, member 2					no							no
A_16_P15065735	1	1p36.11	AHDC1	AT hook, DNA binding motif, containing 1					no							no
A_16_P00034747	1	1p36.11	FGR	Gardner-Rasheed feline sarcoma viral (v-fgr) oncogene homolog					no							no
A_14_P105990	1	1p36.11	IFI6	interferon, alpha-inducible protein 6					no							no
A_14_P107298	1	1p35.3	AK098318	Transcribed locus					no							no
A_14_P104229	1	1p35.3	chr1:028204565-028204609	---					no							no
A_14_P108896	1	1p35.3	PHACTR4	phosphatase and actin regulator 4					no							no
A_14_P113587	1	1p35.3	SNHG3	small nucleolar RNA host gene (non-protein coding) 3					no							no
A_14_P120765	1	1p35.3	RCC1	regulator of chromosome condensation 1					no							no
A_14_P112459	1	1p35.3	TRSPAP1	tRNA selenocysteine associated protein 1					no							no
A_16_P00035713	1	1p35.3	RAB42	RAB42, member RAS oncogene family					no							no
A_16_P00035727	1	1p35.3	TAF12	TAF12 RNA polymerase II, TATA box binding protein (TBP)-associated factor, 20kDa					no							no
A_16_P00035773	1	1p35.3	GMEB1	glucocorticoid modulatory element binding protein 1					no							no
A_14_P129609	1	1p35.3	YTHDF2	YTH domain family, member 2					no							no
A_16_P15068901	1	1p35.3	SFRS4	splicing factor, arginine/serine-rich 4					no							no
A_16_P15069021	1	1p35.3	MECR	mitochondrial trans-2-enoyl-CoA reductase					no							no
A_14_P119763	1	1p35.3	PTPRU	protein tyrosine phosphatase, receptor type, U					no							no
A_16_P15072450	1	1p35.2	LAPTM5	lysosomal associated multispanning membrane protein 5					no							no
A_16_P15072918	1	1p35.2	PUM1	pumilio homolog 1 (Drosophila)					no							no
A_16_P00038942	1	1p35.2	NKAIN1	Na+/K+ transporting ATPase interacting 1					no							no
A_16_P00039040	1	1p35.2	WDR57	WD repeat domain 57 (U5 snRNP specific)					no							no
A_14_P107843	1	1p35.2	ZCCHC17	zinc finger, CCHC domain containing 17					no							no
A_14_P108743	1	1p35.2	FABP3	fatty acid binding protein 3, muscle and heart (mammary-derived growth inhibitor)					no							no
A_16_P15074002	1	1p35.2	SERINC2	serine incorporator 2					no							no
A_16_P00039397	1	1p35.2	TINAGL1	tubulointerstitial nephritis antigen-like 1					no							no
A_16_P15074388	1	1p35.2	PEF1	penta-EF-hand domain containing 1					no							no
A_16_P00039489	1	1p35.2	COL16A1	collagen, type XVI, alpha 1					no							no
A_16_P15074674	1	1p35.2	BAI2	brain-specific angiogenesis inhibitor 2					no							no
A_14_P130715	1	1p35.2	SPOCD1	SPOC domain containing 1					no							no
A_16_P00039878	1	1p35.2	PTP4A2	protein tyrosine phosphatase type IVA, member 2					no							no
A_16_P15075317	1	1p35.1	KHDRBS1	KH domain containing, RNA binding, signal transduction associated 1					no							no
A_16_P35080124	1	1p35.1	TMEM39B	transmembrane protein 39B					no							no
A_14_P112666	1	1p35.1	KPNA6	karyopherin alpha 6 (importin alpha 7)					no							no
A_16_P00040268	1	1p35.1	CCDC28B	coiled-coil domain containing 28B					no							no
A_16_P15076426	1	1p35.1	ZBTB8	zinc finger and BTB domain containing 8					no							no
A_16_P15076484	1	1p35.1	ZBTB8OS	zinc finger and BTB domain containing 8 opposite strand					no							no
A_14_P134827	1	1p35.1	RBBP4	retinoblastoma binding protein 4					no							no
A_16_P15076621	1	1p35.1	SYNC1	syncoilin, intermediate filament 1					no							no
A_16_P35081560	1	1p35.1	KIAA1522	KIAA1522					no							no
A_16_P15076832	1	1p35.1	YARS	tyrosyl-tRNA synthetase					no							no
A_16_P15076893	1	1p35.1	S100PBP	S100P binding protein					no							no
A_16_P15077032	1	1p35.1	HPCA	hippocalcin					no							no
A_14_P100121	1	1p35.1	TMEM54	transmembrane protein 54					no							no
A_16_P00040985	1	1p35.1	RNF19B	ring finger protein 19B					no							no
A_14_P138356	1	1p35.1	AK2	adenylate kinase 2					no							no
A_14_P137111	1	1p35.1	ADC	arginine decarboxylase					no							no
A_16_P00041273	1	1p35.1	TRIM62	tripartite motif-containing 62					no							no
A_14_P106735	1	1p35.1	ZNF362	zinc finger protein 362					no							no
A_16_P15077986	1	1p35.1	PHC2	polyhomeotic homolog 2 (Drosophila)					no							no
A_16_P00043592	1	1p34.3	GJB3	gap junction protein, beta 3, 31kDa					no							no
A_16_P00043610	1	1p34.3	GJA4	gap junction protein, alpha 4, 37kDa					no							no
A_14_P200808	1	1p34.3	C1orf212	chromosome 1 open reading frame 212					no							no
A_16_P15081785	1	1p34.3	DLGAP3	discs, large (Drosophila) homolog-associated protein 3					no							no
A_14_P137781	1	1p34.3	ZMYM6	zinc finger, MYM-type 6					no							no
A_14_P112339	1	1p34.3	ZMYM1	zinc finger, MYM-type 1					no							no
A_14_P134190	1	1p34.3	SFPQ	splicing factor proline/glutamine-rich (polypyrimidine tract binding protein associated)					no							no
A_16_P15082470	1	1p34.3	ZMYM4	zinc finger, MYM-type 4					no							no
A_16_P00044281	1	1p34.3	KIAA0319L	KIAA0319-like					no							no
A_14_P112198	1	1p34.3	NCDN	neurochondrin					no							no
A_16_P00044469	1	1p34.3	TFAP2E	transcription factor AP-2 epsilon (activating enhancer binding protein 2 epsilon)					no							no
A_14_P133676	1	1p34.3	PSMB2	proteasome (prosome, macropain) subunit, beta type, 2					no							no
A_16_P00044658	1	1p34.3	C1orf216	chromosome 1 open reading frame 216					no							no
A_16_P15083823	1	1p34.3	EIF2C1	eukaryotic translation initiation factor 2C, 1					no							no
A_16_P15083967	1	1p34.3	EIF2C3	eukaryotic translation initiation factor 2C, 3					no							no
A_16_P15084234	1	1p34.3	chr1:036206460-036206519	Transcribed locus					no							no
A_14_P119339	1	1p34.3	ADPRHL2	ADP-ribosylhydrolase like 2					no							no
A_14_P128694	1	1p34.3	COL8A2	collagen, type VIII, alpha 2					no							no
A_16_P15084396	1	1p34.3	TRAPPC3	trafficking protein particle complex 3					no							no
A_14_P130827	1	1p34.3	MAP7D1	MAP7 domain containing 1					no							no
A_16_P00045305	1	1p34.3	THRAP3	thyroid hormone receptor associated protein 3					no							no
A_14_P124365	1	1p34.3	C1orf113	chromosome 1 open reading frame 113					no							no
A_14_P122350	1	1p34.3	C1orf78	chromosome 1 open reading frame 78					no							no
A_16_P00045452	1	1p34.3	STK40	serine/threonine kinase 40					no							no
A_14_P106542	1	1p34.3	LSM10	LSM10, U7 small nuclear RNA associated					no							no
A_16_P35090272	1	1p34.3	C1orf102	chromosome 1 open reading frame 102					no							no
A_14_P100113	1	1p34.3	CSF3R	colony stimulating factor 3 receptor (granulocyte)					no							no
A_16_P15085940	1	1p34.3	chr1:036921045-036921104	Transcribed locus					no							no
A_16_P00047155	1	1p34.3	LOC728431	Hypothetical protein LOC728431					no							no
A_16_P15087735	1	1p34.3	ZC3H12A	zinc finger CCCH-type containing 12A					no							no
A_14_P130882	1	1p34.3	C1orf149	chromosome 1 open reading frame 149					no							no
A_16_P15087851	1	1p34.3	chr1:037663714-037663773	Transcribed locus					no							no
A_14_P114681	1	1p34.3	SNIP1	Smad nuclear interacting protein 1					no							no
A_14_P139721	1	1p34.3	DNALI1	dynein, axonemal, light intermediate chain 1					no							no
A_16_P15087932	1	1p34.3	GNL2	guanine nucleotide binding protein-like 2 (nucleolar)					no							no
A_16_P15088029	1	1p34.3	RSPO1	R-spondin homolog (Xenopus laevis)					no							no
A_16_P00047468	1	1p34.3	C1orf109	chromosome 1 open reading frame 109					no							no
A_16_P35093604	1	1p34.3	CDCA8	cell division cycle associated 8					no							no
A_14_P107538	1	1p34.3	EPHA10	EPH receptor A10					no							no
A_16_P35093848	1	1p34.3	MANEAL	mannosidase, endo-alpha-like					no							no
A_16_P15088526	1	1p34.3	YRDC	yrdC domain containing (E. coli)					no							no
A_16_P00047650	1	1p34.3	MTF1	metal-regulatory transcription factor 1					no							no
A_16_P00047727	1	1p34.3	INPP5B	inositol polyphosphate-5-phosphatase, 75kDa					no							no
A_16_P15088863	1	1p34.3	SF3A3	splicing factor 3a, subunit 3, 60kDa					no							no
A_14_P139364	1	1p34.3	FHL3	four and a half LIM domains 3					no							no
A_16_P15088988	1	1p34.3	UTP11L	UTP11-like, U3 small nucleolar ribonucleoprotein, (yeast)					no							no
A_14_P200965	1	1p34.3	RRAGC	Ras-related GTP binding C					no							no
A_16_P00049107	1	1p34.3	MYCBP	c-myc binding protein					no							no
A_16_P35096500	1	1p34.3	RHBDL2	rhomboid, veinlet-like 2 (Drosophila)					no							no
A_16_P15091177	1	1p34.3	C1orf108	chromosome 1 open reading frame 108					no							no
A_16_P15091248	1	1p34.3	NDUFS5	NADH dehydrogenase (ubiquinone) Fe-S protein 5, 15kDa (NADH-coenzyme Q reductase)					no							no
A_16_P00049737	1	1p34.3	MACF1	microtubule-actin crosslinking factor 1					no							no
A_16_P00049967	1	1p34.3	LOC728448	peptidylprolyl isomerase E pseudogene					no							no
A_16_P00050001	1	1p34.3	PABPC4	poly(A) binding protein, cytoplasmic 4 (inducible form)					no							no
A_16_P00050068	1	1p34.3	HEYL	hairy/enhancer-of-split related with YRPW motif-like					no							no
A_16_P15092977	1	1p34.2	PPIE	peptidylprolyl isomerase E (cyclophilin E)					no							no
A_14_P108054	1	1p34.2	TRIT1	tRNA isopentenyltransferase 1					no							no
A_16_P35099032	1	1p34.2	MYCL1	v-myc myelocytomatosis viral oncogene homolog 1, lung carcinoma derived (avian)					no							no
A_16_P15093453	1	1p34.2	MFSD2	major facilitator superfamily domain containing 2					no							no
A_16_P00050542	1	1p34.2	CAP1	CAP, adenylate cyclase-associated protein 1 (yeast)					no							no
A_14_P104430	1	1p34.2	PPT1	palmitoyl-protein thioesterase 1 (ceroid-lipofuscinosis, neuronal 1, infantile)					no							no
A_16_P00050689	1	1p34.2	RLF	rearranged L-myc fusion					no							no
A_16_P00050842	1	1p34.2	ZMPSTE24	zinc metallopeptidase (STE24 homolog, S. cerevisiae)					no							no
A_16_P15094226	1	1p34.2	COL9A2	collagen, type IX, alpha 2					no							no
A_14_P101560	1	1p34.2	SMAP1L	stromal membrane-associated protein 1-like					no							no
A_16_P15094635	1	1p34.2	C1orf176	chromosome 1 open reading frame 176					no							yes
A_16_P15094813	1	1p34.2	RIMS3	regulating synaptic membrane exocytosis 3					no					0.000873506		yes		Loss
A_16_P15095028	1	1p34.2	NFYC	nuclear transcription factor Y, gamma					no					0.0391221		yes		Loss
A_14_P122106	1	1p34.2	CITED4	Cbp/p300-interacting transactivator, with Glu/Asp-rich carboxy-terminal domain, 4					no							yes
A_16_P35101536	1	1p34.2	CTPS	CTP synthase					no					0.0198852		yes		Loss
A_16_P15095895	1	1p34.2	SCMH1	sex comb on midleg homolog 1 (Drosophila)					no							yes
A_16_P15096395	1	1p34.2	chr1:041487052-041487111	---					no							yes
A_14_P129750	1	1p34.2	EDN2	endothelin 2					no							yes
A_16_P00052417	1	1p34.2	chr1:041639507-041639563	CDNA clone IMAGE:6254031					no							yes
A_14_P116083	1	1p34.2	HIVEP3	human immunodeficiency virus type I enhancer binding protein 3					no							yes
A_14_P103960	1	1p34.2	AB046775	Homo sapiens, clone IMAGE:5180231, mRNA					no							no
A_14_P106190	1	1p34.2	GUCA2A	guanylate cyclase activator 2A (guanylin)					no							no
A_16_P00053402	1	1p34.2	FOXJ3	forkhead box J3					no							no
A_16_P35104948	1	1p34.2	FAM80A	family with sequence similarity 80, member A					no							no
A_14_P113499	1	1p34.2	PPCS	phosphopantothenoylcysteine synthetase					no							no
A_16_P00053801	1	1p34.2	RP4-692D3.1	hypothetical protein LOC728621					no							no
A_16_P15099422	1	1p34.2	PPIH	peptidylprolyl isomerase H (cyclophilin H)					no							no
A_16_P15099518	1	1p34.2	YBX1	Y box binding protein 1					no							no
A_16_P15099652	1	1p34.2	LEPRE1	leucine proline-enriched proteoglycan (leprecan) 1					no							no
A_14_P101067	1	1p34.2	C1orf50	chromosome 1 open reading frame 50					no							no
A_16_P00054142	1	1p34.2	CCDC23	coiled-coil domain containing 23					no							no
A_14_P116853	1	1p34.2	ZNF691	zinc finger protein 691					no							no
A_16_P15100136	1	1p34.2	FLJ32224	hypothetical gene supported by AK056786					no							no
A_16_P15100471	1	1p34.2	EBNA1BP2	EBNA1 binding protein 2					no							no
A_16_P15100670	1	1p34.2	TMEM125	transmembrane protein 125					no							no
A_14_P121883	1	1p34.2	C1orf210	chromosome 1 open reading frame 210					no							no
A_16_P35106839	1	1p34.2	TIE1	tyrosine kinase with immunoglobulin-like and EGF-like domains 1					no							no
A_14_P102603	1	1p34.2	ELOVL1	elongation of very long chain fatty acids (FEN1/Elo2, SUR4/Elo3, yeast)-like 1					no							no
A_14_P119149	1	1p34.2	MED8	mediator complex subunit 8					no							no
A_16_P35107234	1	1p34.2	KIAA0467	KIAA0467					no							no
A_14_P104175	1	1p34.2	HYI	hydroxypyruvate isomerase homolog (E. coli)					no							no
A_16_P00054967	1	1p34.2	PTPRF	protein tyrosine phosphatase, receptor type, F					no							no
A_16_P15101623	1	1p34.2	JMJD2A	jumonji domain containing 2A					no							no
A_14_P137034	1	1p34.1	ST3GAL3	ST3 beta-galactoside alpha-2,3-sialyltransferase 3					no							no
A_16_P00055538	1	1p34.1	ARTN	artemin					no							yes
A_16_P00055558	1	1p34.1	IPO13	importin 13					no							yes
A_16_P00055603	1	1p34.1	DPH2	DPH2 homolog (S. cerevisiae)					no							yes
A_14_P104935	1	1p34.1	ATP6V0B	ATPase, H+ transporting, lysosomal 21kDa, V0 subunit b					no							yes
A_14_P105306	1	1p34.1	B4GALT2	UDP-Gal:betaGlcNAc beta 1,4- galactosyltransferase, polypeptide 2					no							yes
A_14_P110895	1	1p34.1	CCDC24	coiled-coil domain containing 24					no							no
A_16_P00055657	1	1p34.1	SLC6A9	solute carrier family 6 (neurotransmitter transporter, glycine), member 9					no							no
A_16_P15102843	1	1p34.1	DMAP1	DNA methyltransferase 1 associated protein 1					no							no
A_16_P00055902	1	1p34.1	PRNPIP	prion protein interacting protein					no							no
A_14_P116701	1	1p34.1	C1orf164	chromosome 1 open reading frame 164					no							no
A_16_P00056614	1	1p34.1	TMEM53	transmembrane protein 53					no							no
A_16_P15104204	1	1p34.1	KIF2C	kinesin family member 2C					no							no
A_14_P109506	1	1p34.1	RPS8	ribosomal protein S8					no							no
A_16_P15104335	1	1p34.1	PLK3	polo-like kinase 3 (Drosophila)					no							no
A_16_P00056785	1	1p34.1	LOC149478	Hypothetical protein LOC149478					no							no
A_16_P00056839	1	1p34.1	EIF2B3	eukaryotic translation initiation factor 2B, subunit 3 gamma, 58kDa					no							no
A_14_P120631	1	1p34.1	HECTD3	HECT domain containing 3					no							no
A_16_P15104784	1	1p34.1	UROD	uroporphyrinogen decarboxylase					no							no
A_16_P00057039	1	1p34.1	ZSWIM5	zinc finger, SWIM-type containing 5					no							no
A_16_P15105237	1	1p34.1	HPDL	4-hydroxyphenylpyruvate dioxygenase-like					no							no
A_14_P107667	1	1p34.1	MUTYH	mutY homolog (E. coli)					no							no
A_14_P112684	1	1p34.1	TOE1	target of EGR1, member 1 (nuclear)					no							no
A_16_P00057303	1	1p34.1	TESK2	testis-specific kinase 2					no							no
A_16_P00057444	1	1p34.1	LOC126661	hypothetical protein LOC126661					no							no
A_16_P00057459	1	1p34.1	MMACHC	methylmalonic aciduria (cobalamin deficiency) cblC type, with homocystinuria					no							no
A_16_P15105621	1	1p34.1	PRDX1	peroxiredoxin 1					no							no
A_14_P132757	1	1p34.1	AKR1A1	aldo-keto reductase family 1, member A1 (aldehyde reductase)					no							no
A_14_P116208	1	1p34.1	NASP	nuclear autoantigenic sperm protein (histone-binding)					no							no
A_14_P104967	1	1p34.1	GPBP1L1	GC-rich promoter binding protein 1-like 1					no							no
A_16_P35112577	1	1p34.1	TMEM69	transmembrane protein 69					no							no
A_16_P15106054	1	1p34.1	IPP	intracisternal A particle-promoted polypeptide					no							no
A_16_P15106164	1	1p34.1	MAST2	microtubule associated serine/threonine kinase 2					no							no
A_14_P122646	1	1p34.1	PIK3R3	phosphoinositide-3-kinase, regulatory subunit 3 (p55, gamma)					no							no
A_16_P15106867	1	1p34.1	TSPAN1	tetraspanin 1					no							no
A_16_P35113537	1	1p34.1	POMGNT1	protein O-linked mannose beta1,2-N-acetylglucosaminyltransferase					no							no
A_14_P135477	1	1p34.1	RAD54L	RAD54-like (S. cerevisiae)					no							no
A_16_P15107070	1	1p34.1	LRRC41	leucine rich repeat containing 41					no							no
A_14_P103271	1	1p34.1	UQCRH	ubiquinol-cytochrome c reductase hinge protein					no							no
A_16_P35113837	1	1p33	NSUN4	NOL1/NOP2/Sun domain family, member 4					no							no
A_16_P00058393	1	1p33	FAAH	fatty acid amide hydrolase					no							no
A_16_P00058679	1	1p33	MKNK1	MAP kinase interacting serine/threonine kinase 1					no							no
A_16_P15107939	1	1p33	ATPAF1	ATP synthase mitochondrial F1 complex assembly factor 1					no							no
A_14_P130875	1	1p33	KIAA0494	KIAA0494					no							no
A_16_P00059017	1	1p33	CYP4B1	cytochrome P450, family 4, subfamily B, polypeptide 1					no							no
A_16_P15108356	1	1p33	CYP4Z2P	cytochrome P450 4Z2 pseudogene					no							no
A_14_P115429	1	1p33	CYP4X1	cytochrome P450, family 4, subfamily X, polypeptide 1					no							no
A_16_P00059216	1	1p33	CYP4Z1	cytochrome P450, family 4, subfamily Z, polypeptide 1					no							no
A_16_P00059263	1	1p33	PDZK1IP1	PDZK1 interacting protein 1					no							no
A_16_P15108954	1	1p33	TAL1	T-cell acute lymphocytic leukemia 1					no							no
A_16_P35115874	1	1p33	STIL	SCL/TAL1 interrupting locus					no							no
A_16_P15109344	1	1p33	CMPK	cytidylate kinase					no							no
A_16_P15111658	1	1p33	chr1:048469917-048469965	CDNA clone IMAGE:4798227					no							no
A_14_P106387	1	1p33	SPATA6	spermatogenesis associated 6					no							no
A_14_P108501	1	1p32.3	FAF1	Fas (TNFRSF6) associated factor 1					no							no
A_16_P15117170	1	1p32.3	CDKN2C	cyclin-dependent kinase inhibitor 2C (p18, inhibits CDK4)					no							no
A_16_P00064301	1	1p32.3	RNF11	ring finger protein 11					no							no
A_16_P00064375	1	1p32.3	C1orf34	chromosome 1 open reading frame 34					no							no
A_16_P15117859	1	1p32.3	EPS15	epidermal growth factor receptor pathway substrate 15					no							no
A_16_P35125248	1	1p32.3	chr1:051735213-051735272	MRNA activated in tumor suppression, clone TSAP20					no							no
A_14_P123139	1	1p32.3	OSBPL9	oxysterol binding protein-like 9					no							no
A_14_P115211	1	1p32.3	NRD1	nardilysin (N-arginine dibasic convertase)					no							no
A_14_P132754	1	1p32.3	RAB3B	RAB3B, member RAS oncogene family					no							no
A_16_P15119329	1	1p32.3	TXNDC12	thioredoxin domain containing 12 (endoplasmic reticulum)					no							no
A_16_P15119427	1	1p32.3	BTF3L4	basic transcription factor 3-like 4					no							no
A_16_P35126818	1	1p32.3	ZFYVE9	zinc finger, FYVE domain containing 9					no							yes
A_14_P109448	1	1p32.3	PRPF38A	PRP38 pre-mRNA processing factor 38 (yeast) domain containing A					no							yes
A_16_P15120139	1	1p32.3	ZCCHC11	zinc finger, CCHC domain containing 11					no							no
A_16_P00066026	1	1p32.3	GPX7	glutathione peroxidase 7					no							no
A_16_P00066110	1	1p32.3	C1orf163	chromosome 1 open reading frame 163					no							no
A_16_P00066199	1	1p32.3	ZYG11B	zyg-11 homolog B (C. elegans)					no							no
A_16_P15121045	1	1p32.3	ZYG11A	zyg-11 homolog A (C. elegans)					no							no
A_16_P35128203	1	1p32.3	ECHDC2	enoyl Coenzyme A hydratase domain containing 2					no							no
A_16_P15121344	1	1p32.3	SCP2	sterol carrier protein 2					no							no
A_14_P109900	1	1p32.3	PODN	podocan					no							no
A_16_P15121699	1	1p32.3	CPT2	carnitine palmitoyltransferase II					no							no
A_14_P200025	1	1p32.3	C1orf123	chromosome 1 open reading frame 123					no							no
A_16_P15121773	1	1p32.3	MAGOH	mago-nashi homolog, proliferation-associated (Drosophila)					no							no
A_16_P35129039	1	1p32.3	LRP8	low density lipoprotein receptor-related protein 8, apolipoprotein e receptor					no							no
A_16_P35130004	1	1p32.3	GLIS1	CATX-6 gene, partial sequence					no							no
A_16_P35130436	1	1p32.3	TMEM48	transmembrane protein 48					no							no
A_16_P15123380	1	1p32.3	YIPF1	Yip1 domain family, member 1					no							no
A_16_P15123509	1	1p32.3	DIO1	deiodinase, iodothyronine, type I					no							no
A_16_P15123564	1	1p32.3	C1orf41	chromosome 1 open reading frame 41					no							no
A_16_P15123625	1	1p32.3	LRRC42	leucine rich repeat containing 42					no							no
A_16_P00067878	1	1p32.3	chr1:054200576-054200635	CDNA FLJ33090 fis, clone TRACH2000559					no							no
A_16_P15123771	1	1p32.3	TMEM59	transmembrane protein 59					no							no
A_16_P35131425	1	1p32.3	AK122760	---					no							yes
A_16_P15124193	1	1p32.3	MRPL37	mitochondrial ribosomal protein L37					no							yes
A_16_P15124265	1	1p32.3	SSBP3	single stranded DNA binding protein 3					no					0.026139		yes		Loss
A_16_P15125260	1	1p32.3	ACOT11	acyl-CoA thioesterase 11					no							yes
A_14_P136930	1	1p32.3	TTC4	tetratricopeptide repeat domain 4					no							yes
A_16_P00068964	1	1p32.3	PARS2	prolyl-tRNA synthetase 2, mitochondrial (putative)					no							yes
A_16_P00069000	1	1p32.3	chr1:054954057-054954116	Transcribed locus					no					3.16584e-08		yes		Loss
A_16_P00069089	1	1p32.3	DHCR24	24-dehydrocholesterol reductase					no							yes
A_16_P00069221	1	1p32.3	TMEM61	transmembrane protein 61					no							yes
A_16_P15126229	1	1p32.3	USP24	ubiquitin specific peptidase 24					no							yes
A_16_P35136335	1	1p32.2	LOC127406	similar to laminin receptor 1 (ribosomal protein SA)					no							yes
A_14_P104306	1	1p32.2	PPAP2B	phosphatidic acid phosphatase type 2B					no							yes
A_16_P35137589	1	1p32.2	PRKAA2	protein kinase, AMP-activated, alpha 2 catalytic subunit					no							yes
A_16_P35137611	1	1p32.2	C1orf168	chromosome 1 open reading frame 168					no							yes
A_16_P00074460	1	1p32.1	TACSTD2	tumor-associated calcium signal transducer 2					no							no
A_14_P106389	1	1p32.1	MYSM1	myb-like, SWIRM and MPN domains 1					no							no
A_16_P00074614	1	1p32.1	chr1:58854630-58854689	Myb-like, SWIRM and MPN domains 1					no							no
A_14_P202416	1	1p32.1	JUN	jun oncogene					no							no
A_16_P15135446	1	1p32.1	AK055150	Transcribed locus					no							no
A_16_P00075984	1	1p32.1	FLJ10986	hypothetical protein FLJ10986					no							no
A_16_P15137838	1	1p32.1	HOOK1	hook homolog 1 (Drosophila)					no							no
A_16_P00076358	1	1p32.1	CYP2J2	cytochrome P450, family 2, subfamily J, polypeptide 2					no							no
A_16_P00078024	1	1p31.3	NFIA	nuclear factor I/A					no							no
A_16_P35150160	1	1p31.3	TM2D1	TM2 domain containing 1					no							no
A_16_P00079676	1	1p31.3	INADL	InaD-like (Drosophila)					no							no
A_16_P00079789	1	1p31.3	ANKRD38	ankyrin repeat domain 38					no							no
A_14_P127729	1	1p31.3	USP1	ubiquitin specific peptidase 1					no							no
A_16_P15144367	1	1p31.3	DOCK7	dedicator of cytokinesis 7					no							no
A_16_P15146490	1	1p31.3	ALG6	asparagine-linked glycosylation 6 homolog (S. cerevisiae, alpha-1,3-glucosyltransferase)					no							no
A_16_P15146668	1	1p31.3	ITGB3BP	integrin beta 3 binding protein (beta3-endonexin)					no							no
A_16_P35154699	1	1p31.3	EFCAB7	EF-hand calcium binding domain 7					no							no
A_16_P15147003	1	1p31.3	PGM1	phosphoglucomutase 1					no							no
A_16_P00082619	1	1p31.3	ROR1	receptor tyrosine kinase-like orphan receptor 1					no							no
A_16_P15149173	1	1p31.3	CACHD1	cache domain containing 1					no							no
A_16_P15150058	1	1p31.3	RAVER2	ribonucleoprotein, PTB-binding 2					no							no
A_16_P35158169	1	1p31.3	JAK1	Janus kinase 1 (a protein tyrosine kinase)					no							no
A_16_P15150840	1	1p31.3	chr1:065227167-065227224	Transcribed locus, strongly similar to XP_530134.1 PREDICTED: hypothetical protein XP_530134 [Pan troglodytes]					no							no
A_16_P15150856	1	1p31.3	chr1:065232536-065232595	---					no							no
A_16_P00084082	1	1p31.3	LOC645619	similar to Adenylate kinase isoenzyme 4, mitochondrial (ATP-AMP transphosphorylase)					no							no
A_16_P00084239	1	1p31.3	DNAJC6	DnaJ (Hsp40) homolog, subfamily C, member 6					no							no
A_16_P35160390	1	1p31.2	PDE4B	phosphodiesterase 4B, cAMP-specific (phosphodiesterase E4 dunce homolog, Drosophila)					no							no
A_16_P15155399	1	1p31.2	MIER1	mesoderm induction early response 1 homolog (Xenopus laevis)					no							no
A_14_P130955	1	1p31.2	SLC35D1	solute carrier family 35 (UDP-glucuronic acid/UDP-N-acetylgalactosamine dual transporter), member D1					no							no
A_16_P35164108	1	1p31.2	IL12RB2	interleukin 12 receptor, beta 2					no							no
A_16_P15156325	1	1p31.2	SERBP1	SERPINE1 mRNA binding protein 1					no							no
A_14_P202150	1	1p31.2	GADD45A	growth arrest and DNA-damage-inducible, alpha					no							no
A_16_P35165104	1	1p31.2	GNG12	guanine nucleotide binding protein (G protein), gamma 12					no							no
A_16_P15157785	1	1p31.2	DIRAS3	DIRAS family, GTP-binding RAS-like 3					no							no
A_16_P00088163	1	1p31.2	GPR177	G protein-coupled receptor 177					no							no
A_16_P15158829	1	1p31.2	DEPDC1	DEP domain containing 1					no							no
A_14_P122982	1	1p31.1	LRRC40	leucine rich repeat containing 40					no							no
A_16_P00090992	1	1p31.1	SFRS11	splicing factor, arginine/serine-rich 11					no							no
A_16_P35171044	1	1p31.1	ANKRD13C	ankyrin repeat domain 13C					no							no
A_16_P35171405	1	1p31.1	CTH	cystathionase (cystathionine gamma-lyase)					no							no
A_16_P00092205	1	1p31.1	ZRANB2	zinc finger, RAN-binding domain containing 2					no							no
A_14_P103412	1	1p31.1	NEGR1	neuronal growth regulator 1					no							no
A_16_P15171952	1	1p31.1	FPGT	fucose-1-phosphate guanylyltransferase					no							no
A_16_P00097122	1	1p31.1	C1orf173	chromosome 1 open reading frame 173					no							no
A_14_P201726	1	1p31.1	CRYZ	crystallin, zeta (quinone reductase)					no							no
A_16_P15173356	1	1p31.1	TYW3	tRNA-yW synthesizing protein 3 homolog (S. cerevisiae)					no							no
A_16_P35182505	1	1p31.1	LHX8	LIM homeobox 8					no							no
A_16_P35182651	1	1p31.1	SLC44A5	solute carrier family 44, member 5					no							no
A_16_P15175362	1	1p31.1	ACADM	acyl-Coenzyme A dehydrogenase, C-4 to C-12 straight chain					no							no
A_16_P15175490	1	1p31.1	RABGGTB	Rab geranylgeranyltransferase, beta subunit					no							no
A_14_P122321	1	1p31.1	ST6GALNAC3	ST6 (alpha-N-acetyl-neuraminyl-2,3-beta-galactosyl-1,3)-N-acetylgalactosaminide alpha-2,6-sialyltransferase 3					no							no
A_14_P112280	1	1p31.1	ST6GALNAC5	ST6 (alpha-N-acetyl-neuraminyl-2,3-beta-galactosyl-1,3)-N-acetylgalactosaminide alpha-2,6-sialyltransferase 5					no							no
A_16_P15178622	1	1p31.1	PIGK	phosphatidylinositol glycan anchor biosynthesis, class K					no							no
A_16_P15179059	1	1p31.1	AK5	adenylate kinase 5					no							no
A_14_P116648	1	1p31.1	ZZZ3	zinc finger, ZZ-type containing 3					no							no
A_14_P124008	1	1p31.1	USP33	ubiquitin specific peptidase 33					no							no
A_16_P35189020	1	1p31.1	FAM73A	family with sequence similarity 73, member A					no							no
A_16_P15180496	1	1p31.1	NEXN	nexilin (F actin binding protein)					no							no
A_14_P108550	1	1p31.1	FUBP1	far upstream element (FUSE) binding protein 1					no							no
A_16_P15180745	1	1p31.1	DNAJB4	DnaJ (Hsp40) homolog, subfamily B, member 4					no							no
A_16_P00102355	1	1p31.1	PTGFR	prostaglandin F receptor (FP)					no							no
A_16_P35190783	1	1p31.1	IFI44L	interferon-induced protein 44-like					no							no
A_16_P35190850	1	1p31.1	IFI44	interferon-induced protein 44					no							no
A_14_P124854	1	1p31.1	ELTD1	EGF, latrophilin and seven transmembrane domain containing 1					no							no
A_16_P00107423	1	1p31.1	LPHN2	latrophilin 2					no							no
A_14_P200782	1	1p31.1	TTLL7	tubulin tyrosine ligase-like family, member 7					no							no
A_14_P110579	1	1p31.1	PRKACB	protein kinase, cAMP-dependent, catalytic, beta					no							no
A_14_P109681	1	1p31.1	SAMD13	sterile alpha motif domain containing 13					no							no
A_16_P00111075	1	1p31.1	DNASE2B	deoxyribonuclease II beta					no							no
A_16_P15196860	1	1p22.3	BXDC5	brix domain containing 5					no							no
A_14_P130229	1	1p22.3	GNG5	guanine nucleotide binding protein (G protein), gamma 5					no							no
A_16_P15197064	1	1p22.3	CTBS	chitobiase, di-N-acetyl-					no							no
A_16_P15197244	1	1p22.3	SSX2IP	synovial sarcoma, X breakpoint 2 interacting protein					no							no
A_16_P00111679	1	1p22.3	chr1:084985381-084985440	CDNA FLJ34412 fis, clone HEART2002432					no							no
A_14_P121455	1	1p22.3	EDG7	endothelial differentiation, lysophosphatidic acid G-protein-coupled receptor, 7					no							no
A_16_P00111870	1	1p22.3	MCOLN2	mucolipin 2					no							no
A_16_P35206920	1	1p22.3	MCOLN3	mucolipin 3					no							no
A_16_P15198542	1	1p22.3	chr1:085329187-085329246	CDNA clone IMAGE:6186815					no							no
A_16_P15198569	1	1p22.3	chr1:085337130-085337189	CDNA FLJ90705 fis, clone PLACE1007591					no							no
A_16_P15198625	1	1p22.3	SYDE2	synapse defective 1, Rho GTPase, homolog 2 (C. elegans)					no							no
A_16_P35207576	1	1p22.3	C1orf52	chromosome 1 open reading frame 52					no							no
A_14_P127643	1	1p22.3	BCL10	B-cell CLL/lymphoma 10					no							no
A_16_P00112452	1	1p22.3	DDAH1	dimethylarginine dimethylaminohydrolase 1					no							no
A_16_P00112808	1	1p22.3	BX648145	Transcribed locus					no							no
A_16_P15199626	1	1p22.3	CYR61	cysteine-rich, angiogenic inducer, 61					no							no
A_16_P15199798	1	1p22.3	C1orf181	chromosome 1 open reading frame 181					no							no
A_16_P35210175	1	1p22.3	ODF2L	outer dense fiber of sperm tails 2-like					no							no
A_14_P105380	1	1p22.3	CLCA2	chloride channel, calcium activated, family member 2					no							no
A_14_P118445	1	1p22.3	SH3GLB1	SH3-domain GRB2-like endophilin B1					no							no
A_16_P15202335	1	1p22.3	42248	15 kDa selenoprotein					no							no
A_14_P132338	1	1p22.3	HS2ST1	heparan sulfate 2-O-sulfotransferase 1					no							no
A_16_P15203041	1	1p22.3	LOC339524	Hypothetical protein LOC339524					no							no
A_16_P00115318	1	1p22.3	LMO4	LIM domain only 4					no							no
A_16_P35216490	1	1p22.2	PKN2	protein kinase N2					no							no
A_16_P00117680	1	1p22.2	GTF2B	general transcription factor IIB					no							no
A_14_P129220	1	1p22.2	CCBL2	cysteine conjugate-beta lyase 2					no							no
A_16_P15207849	1	1p22.2	chr1:89157063-89157122	cysteine conjugate-beta lyase 2					no							no
A_16_P15207901	1	1p22.2	GBP3	guanylate binding protein 3					no							no
A_16_P00117919	1	1p22.2	GBP1	guanylate binding protein 1, interferon-inducible, 67kDa					no							no
A_16_P15208049	1	1p22.2	chr1:089279518-089279577	---					no							no
A_14_P101655	1	1p22.2	GBP2	guanylate binding protein 2, interferon-inducible					no							no
A_16_P35217292	1	1p22.2	GBP4	guanylate binding protein 4					no							no
A_16_P00118100	1	1p22.2	GBP5	guanylate binding protein 5					no							no
A_16_P15208933	1	1p22.2	LRRC8B	Leucine rich repeat containing 8 family, member B					no							no
A_16_P15209073	1	1p22.2	LRRC8C	leucine rich repeat containing 8 family, member C					no							no
A_16_P15209867	1	1p22.2	LRRC8D	leucine rich repeat containing 8 family, member D					no							no
A_16_P15210133	1	1p22.2	ZNF326	zinc finger protein 326					no							no
A_16_P35221387	1	1p22.2	ZNF644	zinc finger protein 644					no							no
A_16_P15213237	1	1p22.2	CDC7	cell division cycle 7 homolog (S. cerevisiae)					no							no
A_16_P00121317	1	1p22.1	TGFBR3	Transforming growth factor, beta receptor III					no							no
A_16_P35223999	1	1p22.1	ABHD7	abhydrolase domain containing 7					no							no
A_16_P15214943	1	1p22.1	KIAA1107	KIAA1107					no							no
A_16_P00122159	1	1p22.1	GLMN	glomulin, FKBP associated protein					no							no
A_16_P00122235	1	1p22.1	RPAP2	RNA polymerase II associated protein 2					no							no
A_16_P00122482	1	1p22.1	EVI5	ecotropic viral integration site 5					no							no
A_16_P15216287	1	1p22.1	RPL5	ribosomal protein L5					no							no
A_16_P15216777	1	1p22.1	MTF2	metal response element binding transcription factor 2					no							no
A_14_P118397	1	1p22.1	TMED5	transmembrane emp24 protein transport domain containing 5					no							no
A_16_P15217325	1	1p22.1	CR609342	MRNA; cDNA DKFZp667D2123 (from clone DKFZp667D2123)					no							no
A_14_P202490	1	1p22.1	DR1	down-regulator of transcription 1, TBP-binding (negative cofactor 2)					no							no
A_16_P00123690	1	1p22.1	FNBP1L	formin binding protein 1-like					no							no
A_16_P35227250	1	1p22.1	BCAR3	breast cancer anti-estrogen resistance 3					no							no
A_16_P15218553	1	1p22.1	DNTTIP2	deoxynucleotidyltransferase, terminal, interacting protein 2					no							no
A_16_P00124224	1	1p22.1	chr1:094058492-094058551	Full-length cDNA clone CS0CAP007YJ17 of Thymus of Homo sapiens (human)					no							no
A_14_P108881	1	1p22.1	GCLM	glutamate-cysteine ligase, modifier subunit					no							no
A_14_P128433	1	1p22.1	ABCA4	ATP-binding cassette, sub-family A (ABC1), member 4					no							yes
A_14_P135453	1	1p22.1	ARHGAP29	Rho GTPase activating protein 29					no							yes
A_16_P15219905	1	1p21.3	ABCD3	ATP-binding cassette, sub-family D (ALD), member 3					no							no
A_14_P128113	1	1p21.3	F3	coagulation factor III (thromboplastin, tissue factor)					no							no
A_16_P35230553	1	1p21.3	SLC44A3	solute carrier family 44, member 3					no							no
A_16_P35230775	1	1p21.3	CNN3	calponin 3, acidic					no							no
A_16_P00125881	1	1p21.3	ALG14	asparagine-linked glycosylation 14 homolog (S. cerevisiae)					no							no
A_14_P130562	1	1p21.3	RWDD3	RWD domain containing 3					no							no
A_16_P15221926	1	1p21.3	chr1:95408345-95408404	RWD domain containing 3					no							no
A_16_P35234927	1	1p21.3	PTBP2	polypyrimidine tract binding protein 2					no							no
A_16_P35235808	1	1p21.3	DPYD	dihydropyrimidine dehydrogenase					no							no
A_14_P102909	1	1p21.3	SNX7	sorting nexin 7					no							no
A_16_P00131791	1	1p21.3	AK095544	CDNA FLJ38225 fis, clone FCBBF2003528					no							no
A_14_P111498	1	1p21.2	PALMD	palmdelphin					no							no
A_16_P15233168	1	1p21.2	AGL	amylo-1, 6-glucosidase, 4-alpha-glucanotransferase (glycogen debranching enzyme, glycogen storage disease type III)					no							no
A_16_P15233407	1	1p21.2	SLC35A3	solute carrier family 35 (UDP-N-acetylglucosamine (UDP-GlcNAc) transporter), member A3					no							no
A_16_P35243414	1	1p21.2	HIAT1	hippocampus abundant transcript 1					no							no
A_14_P120135	1	1p21.2	CCDC76	coiled-coil domain containing 76					no							no
A_14_P122519	1	1p21.2	DBT	dihydrolipoamide branched chain transacylase E2					no							no
A_14_P105734	1	1p21.2	RTCD1	RNA terminal phosphate cyclase domain 1					no							no
A_16_P00133945	1	1p21.2	CDC14A	CDC14 cell division cycle 14 homolog A (S. cerevisiae)					no							no
A_16_P00133983	1	1p21.2	GPR88	G protein-coupled receptor 88					no							no
A_16_P00134168	1	1p21.2	VCAM1	vascular cell adhesion molecule 1					no							no
A_16_P15235443	1	1p21.2	EXTL2	exostoses (multiple)-like 2					no							no
A_16_P15235711	1	1p21.2	SLC30A7	solute carrier family 30 (zinc transporter), member 7					no							no
A_14_P131793	1	1p21.2	DPH5	DPH5 homolog (S. cerevisiae)					no							no
A_16_P00134612	1	1p21.2	BX538249	CDNA FLJ11489 fis, clone HEMBA1001915					no							no
A_14_P131982	1	1p21.2	EDG1	endothelial differentiation, sphingolipid G-protein-coupled receptor, 1					no							no
A_16_P35247474	1	1p21.2	OLFM3	olfactomedin 3					no							no
A_14_P111393	1	1p21.1	COL11A1	collagen, type XI, alpha 1					no							no
A_16_P15241444	1	1p21.1	RNPC3	RNA-binding region (RNP1, RRM) containing 3					no							no
A_16_P35251723	1	1p21.1	AMY1A	amylase, alpha 1A (salivary)					yes					0.000610634		yes		Loss
A_16_P35258364	1	1p13.3	PRMT6	protein arginine methyltransferase 6					no							no
A_14_P137721	1	1p13.3	chr1:107394551-107394600	Transcribed locus, moderately similar to XP_948623.1 PREDICTED: hypothetical protein XP_948623 [Homo sapiens]					no							no
A_16_P00142299	1	1p13.3	NTNG1	netrin G1					no							no
A_16_P15249725	1	1p13.3	VAV3	vav 3 guanine nucleotide exchange factor					no							no
A_16_P15251291	1	1p13.3	SLC25A24	solute carrier family 25 (mitochondrial carrier; phosphate carrier), member 24					no							no
A_16_P00143472	1	1p13.3	NBPF4	neuroblastoma breakpoint family, member 4					no							no
A_16_P15251983	1	1p13.3	chr1:108796286-108796345	---					no							no
A_16_P35262357	1	1p13.3	FAM102B	family with sequence similarity 102, member B					no							no
A_16_P15252210	1	1p13.3	C1orf59	chromosome 1 open reading frame 59					no							no
A_16_P15252292	1	1p13.3	PRPF38B	PRP38 pre-mRNA processing factor 38 (yeast) domain containing B					no							no
A_14_P132468	1	1p13.3	STXBP3	syntaxin binding protein 3					no							no
A_16_P15252781	1	1p13.3	GPSM2	G-protein signaling modulator 2 (AGS3-like, C. elegans)					no							no
A_14_P113831	1	1p13.3	CLCC1	chloride channel CLIC-like 1					no							no
A_16_P00144184	1	1p13.3	WDR47	WD repeat domain 47					no							no
A_16_P15253187	1	1p13.3	chr1:109317120-109317179	---					no							no
A_16_P35263501	1	1p13.3	chr1:109340783-109340842	CDNA clone IMAGE:3958310					no							no
A_16_P00144285	1	1p13.3	KIAA1324	KIAA1324					no							no
A_16_P00144326	1	1p13.3	SARS	seryl-tRNA synthetase					no							no
A_16_P00144393	1	1p13.3	CELSR2	cadherin, EGF LAG seven-pass G-type receptor 2 (flamingo homolog, Drosophila)					no							no
A_16_P00144506	1	1p13.3	SORT1	sortilin 1					no							no
A_16_P15254082	1	1p13.3	PSMA5	proteasome (prosome, macropain) subunit, alpha type, 5					no							no
A_16_P15254267	1	1p13.3	chr1:109747602-109747660	---					no							no
A_16_P00144800	1	1p13.3	AMIGO1	adhesion molecule with Ig-like domain 1					no							no
A_16_P15254449	1	1p13.3	GNAI3	guanine nucleotide binding protein (G protein), alpha inhibiting activity polypeptide 3					no							no
A_16_P00145018	1	1p13.3	AMPD2	adenosine monophosphate deaminase 2 (isoform L)					no							no
A_16_P00145080	1	1p13.3	GSTM4	glutathione S-transferase M4					no							no
A_16_P15254789	1	1p13.3	GSTM2	glutathione S-transferase M2 (muscle)					no							no
A_16_P00145107	1	1p13.3	GSTM1	glutathione S-transferase M1					no							no
A_16_P15254872	1	1p13.3	GSTM5	glutathione S-transferase M5					no							no
A_16_P15254944	1	1p13.3	GSTM3	glutathione S-transferase M3 (brain)					no							no
A_16_P00145380	1	1p13.3	CSF1	colony stimulating factor 1 (macrophage)					no							no
A_16_P00145473	1	1p13.3	AHCYL1	S-adenosylhomocysteine hydrolase-like 1					no							no
A_16_P15255663	1	1p13.3	FAM40A	family with sequence similarity 40, member A					no							no
A_14_P113129	1	1p13.3	ALX3	aristaless-like homeobox 3					no							no
A_16_P15256253	1	1p13.3	KCNC4	potassium voltage-gated channel, Shaw-related subfamily, member 4					no							no
A_14_P110423	1	1p13.3	RBM15	RNA binding motif protein 15					no							no
A_16_P00146169	1	1p13.3	SLC16A4	solute carrier family 16, member 4 (monocarboxylic acid transporter 5)					no							no
A_16_P15256742	1	1p13.3	HBXIP	hepatitis B virus x interacting protein					no							no
A_16_P00146728	1	1p13.3	AK021960	---					no							no
A_16_P15257948	1	1p13.3	CD53	CD53 molecule					no							no
A_16_P15258030	1	1p13.3	C1orf103	chromosome 1 open reading frame 103					no							no
A_16_P15258195	1	1p13.3	TMEM77	transmembrane protein 77					no							no
A_16_P35269021	1	1p13.3	CEPT1	choline/ethanolamine phosphotransferase 1					no							no
A_16_P35269092	1	1p13.3	DENND2D	DENN/MADD domain containing 2D					no							no
A_16_P00147314	1	1p13.3	CHI3L2	chitinase 3-like 2					no							no
A_16_P15258752	1	1p13.2	C1orf88	chromosome 1 open reading frame 88					no							no
A_14_P132649	1	1p13.2	OVGP1	oviductal glycoprotein 1, 120kDa (mucin 9, oviductin)					no							no
A_16_P15258976	1	1p13.2	WDR77	WD repeat domain 77					no							no
A_16_P35269784	1	1p13.2	ATP5F1	ATP synthase, H+ transporting, mitochondrial F0 complex, subunit B1					no							no
A_16_P15259070	1	1p13.2	C1orf162	chromosome 1 open reading frame 162					no							no
A_16_P15259130	1	1p13.2	ADORA3	adenosine A3 receptor					no							no
A_14_P127616	1	1p13.2	RAP1A	RAP1A, member of RAS oncogene family					no							no
A_16_P35270396	1	1p13.2	AK094737	CDNA FLJ37418 fis, clone BRAWH2000488					no							no
A_14_P114738	1	1p13.2	DDX20	DEAD (Asp-Glu-Ala-Asp) box polypeptide 20					no							no
A_16_P15259799	1	1p13.2	AF070632	MRNA; cDNA DKFZp547P042 (from clone DKFZp547P042)					no							no
A_16_P00149002	1	1p13.2	CTTNBP2NL	CTTNBP2 N-terminal like					no							no
A_16_P35272698	1	1p13.2	CAPZA1	capping protein (actin filament) muscle Z-line, alpha 1					no							no
A_14_P102485	1	1p13.2	MOV10	Mov10, Moloney leukemia virus 10, homolog (mouse)					no							no
A_14_P120722	1	1p13.2	RHOC	ras homolog gene family, member C					no							no
A_16_P15262113	1	1p13.2	PPM1J	protein phosphatase 1J (PP2C domain containing)					no							no
A_14_P202042	1	1p13.2	LRIG2	leucine-rich repeats and immunoglobulin-like domains 2					no							no
A_16_P35273814	1	1p13.2	AK125443	CDNA FLJ43454 fis, clone OCBBF2034906					no							no
A_14_P132830	1	1p13.2	RSBN1	round spermatid basic protein 1					no							no
A_16_P35275285	1	1p13.2	PTPN22	protein tyrosine phosphatase, non-receptor type 22 (lymphoid)					no							no
A_14_P113700	1	1p13.2	AP4B1	adaptor-related protein complex 4, beta 1 subunit					no							no
A_14_P108305	1	1p13.2	DCLRE1B	DNA cross-link repair 1B (PSO2 homolog, S. cerevisiae)					no							no
A_16_P35275739	1	1p13.2	HIPK1	homeodomain interacting protein kinase 1					no							no
A_14_P127912	1	1p13.2	OLFML3	olfactomedin-like 3					no							no
A_14_P112940	1	1p13.2	TRIM33	tripartite motif-containing 33					no							no
A_16_P15265999	1	1p13.2	BCAS2	breast carcinoma amplified sequence 2					no							no
A_16_P00151876	1	1p13.1	AMPD1	adenosine monophosphate deaminase 1 (isoform M)					yes							no
A_16_P15266321	1	1p13.1	chr1:114954932-114954991	Homo sapiens, clone IMAGE:3446533, mRNA					yes							no
A_14_P103853	1	1p13.1	CSDE1	cold shock domain containing E1, RNA-binding					yes							no
A_16_P35278103	1	1p13.1	TSPAN2	tetraspanin 2					no							no
A_16_P00152986	1	1p13.1	VANGL1	vang-like 1 (van gogh, Drosophila)					no							no
A_14_P121577	1	1p13.1	CASQ2	calsequestrin 2 (cardiac muscle)					no							no
A_16_P15269344	1	1p13.1	SLC22A15	solute carrier family 22 (organic cation transporter), member 15					no							no
A_14_P110849	1	1p13.1	ATP1A1	ATPase, Na+/K+ transporting, alpha 1 polypeptide					yes							yes
A_16_P00154226	1	1p13.1	CD58	CD58 molecule					yes							yes
A_14_P134554	1	1p13.1	IGSF3	immunoglobulin superfamily, member 3					yes							no
A_16_P15271136	1	1p13.1	CD2	CD2 molecule					no							no
A_16_P00154677	1	1p13.1	PTGFRN	prostaglandin F2 receptor negative regulator					yes							no
A_16_P35283107	1	1p13.1	TTF2	transcription termination factor, RNA polymerase II					yes							no
A_16_P15272018	1	1p13.1	TRIM45	tripartite motif-containing 45					yes							yes
A_14_P120782	1	1p13.1	VTCN1	V-set domain containing T cell activation inhibitor 1					yes							yes
A_14_P131839	1	1p12	FAM46C	family with sequence similarity 46, member C					yes							yes
A_16_P00155918	1	1p12	chr1:118028328-118028387	proline-rich nuclear receptor coactivator 2					yes							yes
A_16_P15273918	1	1p12	WDR3	WD repeat domain 3					yes							yes
A_16_P35285345	1	1p12	SPAG17	sperm associated antigen 17					yes							yes
A_16_P35287192	1	1p12	TBX15	T-box 15					yes							yes
A_14_P201259	1	1p12	WARS2	tryptophanyl tRNA synthetase 2, mitochondrial					yes							yes
A_16_P15277048	1	1p12	HAO2	hydroxyacid oxidase 2 (long chain)					no							yes
A_16_P35289068	1	1p12	ZNF697	zinc finger protein 697					no							yes
A_16_P15277904	1	1p12	PHGDH	phosphoglycerate dehydrogenase					yes							yes
A_16_P00158569	1	1p12	HMGCS2	3-hydroxy-3-methylglutaryl-Coenzyme A synthase 2 (mitochondrial)					yes							yes
A_16_P35289886	1	1p12	NOTCH2	Notch homolog 2 (Drosophila)					no							yes
A_16_P15279122	1	1p11.2	AK022804	---					no							yes
A_16_P15280536	1	1q12	chr1:141507851-141507910	CDNA clone IMAGE:5285703					yes							yes
A_16_P35292124	1	1q12	chr1:141522171-141522230	---					yes							yes
A_16_P15281639	1	1q21.1	PDE4DIP	phosphodiesterase 4D interacting protein (myomegalin)					yes							yes
A_16_P00159305	1	1q21.1	chr1:142435868-142435927	phosphodiesterase 4D interacting protein (myomegalin)					yes							yes
A_14_P103187	1	1q21.1	chr1:142483991-142484039	phosphodiesterase 4D interacting protein (myomegalin)					yes							yes
A_16_P15282024	1	1q21.1	chr1:142553595-142553654	CDNA clone IMAGE:5299143					yes							yes
A_16_P15282068	1	1q21.1	SEC22B	SEC22 vesicle trafficking protein homolog B (S. cerevisiae)					yes							yes
A_16_P00159544	1	1q21.1	chr1:142610589-142610648	CDNA FLJ12742 fis, clone NT2RP2000644					yes							yes
A_16_P15282636	1	1q21.1	NBPF10	neuroblastoma breakpoint family, member 10					yes							yes
A_16_P00159620	1	1q21.1	TXNIP	thioredoxin interacting protein					yes							yes
A_16_P35294756	1	1q21.1	POLR3GL	polymerase (RNA) III (DNA directed) polypeptide G (32kD)-like					yes							yes
A_14_P122491	1	1q21.1	LIX1L	Lix1 homolog (mouse)-like					yes							yes
A_16_P00159764	1	1q21.1	ITGA10	integrin, alpha 10					yes							yes
A_16_P15283358	1	1q21.1	ANKRD35	ankyrin repeat domain 35					yes							yes
A_16_P00159850	1	1q21.1	PIAS3	protein inhibitor of activated STAT, 3					yes							yes
A_14_P122423	1	1q21.1	POLR3C	polymerase (RNA) III (DNA directed) polypeptide C (62kD)					yes							yes
A_16_P35295271	1	1q21.1	ZNF364	zinc finger protein 364					yes							yes
A_14_P105842	1	1q21.1	PDZK1	PDZ domain containing 1					yes							yes
A_16_P15284207	1	1q21.1	NBPF11	neuroblastoma breakpoint family, member 11					yes							yes
A_16_P35296812	1	1q21.1	PRKAB2	protein kinase, AMP-activated, beta 2 non-catalytic subunit					yes							yes
A_16_P00160403	1	1q21.1	FMO5	flavin containing monooxygenase 5					yes							yes
A_16_P00160434	1	1q21.1	chr1:143938711-143938770	chromodomain helicase DNA binding protein 1-like					yes							yes
A_16_P35297633	1	1q21.1	BCL9	B-cell CLL/lymphoma 9					yes							yes
A_14_P119487	1	1q21.1	ACP6	acid phosphatase 6, lysophosphatidic					yes							yes
A_16_P15286252	1	1q21.1	GJA5	gap junction protein, alpha 5, 40kDa					yes							yes
A_16_P00161339	1	1q21.1	GPR89B	G protein-coupled receptor 89B					yes			0.013622				yes	Gain
A_16_P15289248	1	1q21.1	BC062745	CDNA FLJ30424 fis, clone BRACE2008881, weakly similar to ZINC FINGER PROTEIN 195					yes							yes
A_16_P00161695	1	1q21.1	X14355	CDNA FLJ13580 fis, clone PLACE1008851					yes							yes
A_14_P100406	1	1q21.2	BC068044	---					yes							yes
A_16_P35302700	1	1q21.2	HIST2H2BE	histone cluster 2, H2be					yes							yes
A_16_P35302745	1	1q21.2	BOLA1	bolA homolog 1 (E. coli)					yes							yes
A_14_P126260	1	1q21.2	SV2A	synaptic vesicle glycoprotein 2A					yes							yes
A_16_P00161801	1	1q21.2	SF3B4	splicing factor 3b, subunit 4, 49kDa					yes			0.0393896				yes	Gain
A_14_P133628	1	1q21.2	MTMR11	myotubularin related protein 11					yes							yes
A_16_P15290720	1	1q21.2	chr1:146722434-146722493	Transcribed locus					yes							yes
A_16_P15291032	1	1q21.2	VPS45	vacuolar protein sorting 45 homolog (S. cerevisiae)	0.0206759				yes	Gain		0.0270544				yes	Gain
A_14_P103528	1	1q21.2	PLEKHO1	pleckstrin homology domain containing, family O member 1					yes							yes
A_16_P15291368	1	1q21.2	ANP32E	acidic (leucine-rich) nuclear phosphoprotein 32 family, member E					yes							yes
A_14_P123368	1	1q21.2	APH1A	anterior pharynx defective 1 homolog A (C. elegans)	0.0244057				yes	Gain		0.0436854				yes	Gain
A_16_P00162307	1	1q21.2	C1orf54	chromosome 1 open reading frame 54					yes							yes
A_14_P120954	1	1q21.2	C1orf51	chromosome 1 open reading frame 51					yes							yes
A_16_P35303826	1	1q21.2	MRPS21	mitochondrial ribosomal protein S21					yes							yes
A_16_P00162367	1	1q21.2	PRPF3	PRP3 pre-mRNA processing factor 3 homolog (S. cerevisiae)					yes							yes
A_16_P00162491	1	1q21.2	KIAA0460	KIAA0460		0.00751912			yes	Amp						yes
A_14_P111509	1	1q21.2	TARS2	threonyl-tRNA synthetase 2, mitochondrial (putative)	0.0379941				yes	Gain		0.00438888				yes	Gain
A_14_P103598	1	1q21.2	ECM1	extracellular matrix protein 1					yes							yes
A_16_P00162643	1	1q21.2	ADAMTSL4	ADAMTS-like 4					yes							yes
A_16_P00162653	1	1q21.2	chr1:147350532-147350591	Transcribed locus					yes							yes
A_14_P101402	1	1q21.2	MCL1	myeloid cell leukemia sequence 1 (BCL2-related)	0.0452866				yes	Gain		0.0330441				yes	Gain
A_14_P104110	1	1q21.2	ENSA	endosulfine alpha					yes							yes
A_16_P15292292	1	1q21.2	GOLPH3L	golgi phosphoprotein 3-like					yes							yes
A_16_P35304775	1	1q21.2	HORMAD1	HORMA domain containing 1					yes							yes
A_16_P15292467	1	1q21.2	CTSS	cathepsin S					yes							yes
A_16_P00162887	1	1q21.2	CTSK	cathepsin K					yes							yes
A_16_P00162943	1	1q21.2	ARNT	aryl hydrocarbon receptor nuclear translocator					yes							yes
A_16_P00163057	1	1q21.2	SETDB1	SET domain, bifurcated 1					yes			0.0349031				yes	Gain
A_14_P128132	1	1q21.2	LASS2	LAG1 homolog, ceramide synthase 2					yes							yes
A_16_P00163139	1	1q21.2	ANXA9	annexin A9					yes							yes
A_14_P108204	1	1q21.2	FAM63A	family with sequence similarity 63, member A					yes							yes
A_14_P130500	1	1q21.2	PRUNE	prune homolog (Drosophila)	0.0393506				yes	Gain		0.0146531				yes	Gain
A_16_P00163231	1	1q21.2	BNIPL	BCL2/adenovirus E1B 19kD interacting protein like					yes							yes
A_14_P119371	1	1q21.2	C1orf56	chromosome 1 open reading frame 56					yes							yes
A_14_P136601	1	1q21.2	CDC42SE1	CDC42 small effector 1	0.044966				yes	Gain						yes
A_14_P102041	1	1q21.2	MLLT11	myeloid/lymphoid or mixed-lineage leukemia (trithorax homolog, Drosophila); translocated to, 11					yes							yes
A_16_P00163343	1	1q21.2	SEMA6C	sema domain, transmembrane domain (TM), and cytoplasmic domain, (semaphorin) 6C					yes							yes
A_16_P35305969	1	1q21.2	LYSMD1	LysM, putative peptidoglycan-binding, domain containing 1	0.0496571				yes	Gain						yes
A_16_P15293459	1	1q21.2	SCNM1	sodium channel modifier 1	0.0234075				yes	Gain		0.0360045				yes	Gain
A_16_P00163430	1	1q21.2	VPS72	vacuolar protein sorting 72 homolog (S. cerevisiae)	0.0337246				yes	Gain		0.0308929				yes	Gain
A_16_P15293537	1	1q21.2	PIP5K1A	phosphatidylinositol-4-phosphate 5-kinase, type I, alpha					yes							yes
A_16_P35306206	1	1q21.2	PSMD4	proteasome (prosome, macropain) 26S subunit, non-ATPase, 4	0.0414932				yes	Gain		0.0454215				yes	Gain
A_14_P120078	1	1q21.2	ZNF687	zinc finger protein 687					yes							yes
A_16_P15293744	1	1q21.2	PI4KB	phosphatidylinositol 4-kinase, catalytic, beta	0.00466296				yes	Gain						yes
A_16_P15293857	1	1q21.3	RFX5	regulatory factor X, 5 (influences HLA class II expression)					yes							yes
A_14_P128845	1	1q21.3	SELENBP1	selenium binding protein 1	0.0481012				yes	Gain						yes
A_16_P35306583	1	1q21.3	PSMB4	proteasome (prosome, macropain) subunit, beta type, 4	0.0124098				yes	Gain						yes
A_16_P00163711	1	1q21.3	POGZ	pogo transposable element with ZNF domain					yes			0.00218683				yes	Gain
A_16_P15294221	1	1q21.3	CGN	cingulin					yes							yes
A_14_P112451	1	1q21.3	TUFT1	tuftelin 1					yes			0.00612278				yes	Gain
A_14_P123804	1	1q21.3	SNX27	sorting nexin family member 27	0.0340889				yes	Gain		0.0128709				yes	Gain
A_14_P105478	1	1q21.3	TNRC4	trinucleotide repeat containing 4					yes							yes
A_16_P35307422	1	1q21.3	FLJ36032	hypothetical protein FLJ36032					yes							yes
A_16_P00164178	1	1q21.3	MRPL9	mitochondrial ribosomal protein L9	0.0182187				yes	Gain						yes
A_16_P00164193	1	1q21.3	OAZ3	ornithine decarboxylase antizyme 3					yes							yes
A_14_P139391	1	1q21.3	TDRKH	tudor and KH domain containing					yes							yes
A_16_P35307630	1	1q21.3	RORC	RAR-related orphan receptor C					yes							yes
A_16_P15295140	1	1q21.3	THEM4	thioesterase superfamily member 4	0.0478352				yes	Gain						yes
A_16_P15295302	1	1q21.3	S100A10	S100 calcium binding protein A10					yes							yes
A_16_P15295442	1	1q21.3	S100A11	S100 calcium binding protein A11					yes							yes
A_16_P00164682	1	1q21.3	TCHH	trichohyalin					yes							yes
A_16_P15296036	1	1q21.3	FLG	filaggrin					yes							yes
A_16_P15296152	1	1q21.3	FLG2	filaggrin family member 2					yes							yes
A_14_P200033	1	1q21.3	CRCT1	cysteine-rich C-terminal 1					yes							yes
A_16_P00165237	1	1q21.3	LCE3D	late cornified envelope 3D					yes							yes
A_16_P15296915	1	1q21.3	LCE2B	late cornified envelope 2B					yes							yes
A_14_P138003	1	1q21.3	LCE1B	late cornified envelope 1B					yes							yes
A_16_P00165706	1	1q21.3	IVL	involucrin					yes							yes
A_14_P122655	1	1q21.3	SPRR4	small proline-rich protein 4					yes							yes
A_14_P124410	1	1q21.3	SPRR1A	small proline-rich protein 1A					yes							yes
A_16_P00165841	1	1q21.3	SPRR3	small proline-rich protein 3					yes							yes
A_16_P00165868	1	1q21.3	SPRR1B	small proline-rich protein 1B (cornifin)					yes							yes
A_14_P119955	1	1q21.3	SPRR2B	small proline-rich protein 2B					yes							yes
A_16_P35310720	1	1q21.3	SPRR2G	small proline-rich protein 2G					yes							yes
A_14_P110433	1	1q21.3	LOR	loricrin					yes							yes
A_16_P15298409	1	1q21.3	S100A9	S100 calcium binding protein A9					yes							yes
A_16_P15298482	1	1q21.3	S100A8	S100 calcium binding protein A8					yes							yes
A_16_P35311450	1	1q21.3	S100A7	S100 calcium binding protein A7					yes							yes
A_16_P00166481	1	1q21.3	S100A6	S100 calcium binding protein A6					yes							yes
A_16_P15298906	1	1q21.3	S100A2	S100 calcium binding protein A2					yes							yes
A_16_P00166572	1	1q21.3	S100A16	S100 calcium binding protein A16					yes							yes
A_14_P118231	1	1q21.3	S100A14	S100 calcium binding protein A14					yes							yes
A_14_P105005	1	1q21.3	S100A13	S100 calcium binding protein A13					yes							yes
A_14_P134907	1	1q21.3	C1orf77	chromosome 1 open reading frame 77					yes			0.0354243				yes	Gain
A_16_P00166652	1	1q21.3	SNAPIN	SNAP-associated protein					yes			0.0444508				yes	Gain
A_14_P123851	1	1q21.3	ILF2	interleukin enhancer binding factor 2, 45kDa					yes							yes
A_16_P00166679	1	1q21.3	NPR1	natriuretic peptide receptor A/guanylate cyclase A (atrionatriuretic peptide receptor A)					yes							yes
A_14_P120830	1	1q21.3	SLC27A3	solute carrier family 27 (fatty acid transporter), member 3					yes							yes
A_14_P106047	1	1q21.3	GATAD2B	GATA zinc finger domain containing 2B					yes							yes
A_16_P15299561	1	1q21.3	AK094665	---					yes							yes
A_16_P00167026	1	1q21.3	CRTC2	CREB regulated transcription coactivator 2					yes							yes
A_14_P129438	1	1q21.3	SLC39A1	solute carrier family 39 (zinc transporter), member 1					yes							yes
A_14_P103242	1	1q21.3	CREB3L4	cAMP responsive element binding protein 3-like 4					yes							yes
A_14_P138500	1	1q21.3	JTB	jumping translocation breakpoint	0.0130974				yes	Gain		0.0141059				yes	Gain
A_16_P15299855	1	1q21.3	RAB13	RAB13, member RAS oncogene family					yes			0.0349031				yes	Gain
A_16_P00167104	1	1q21.3	RPS27	ribosomal protein S27 (metallopanstimulin 1)					yes							yes
A_16_P15300146	1	1q21.3	TPM3	tropomyosin 3					yes			0.0315402				yes	Gain
A_16_P00167312	1	1q21.3	C1orf43	chromosome 1 open reading frame 43	0.037784				yes	Gain		0.0101265				yes	Gain
A_16_P15300323	1	1q21.3	UBAP2L	ubiquitin associated protein 2-like					yes			0.0034926				yes	Gain
A_14_P109760	1	1q21.3	HAX1	HCLS1 associated protein X-1	0.0303577				yes	Gain						yes
A_14_P200038	1	1q21.3	ATP8B2	ATPase, class I, type 8B, member 2					yes							yes
A_14_P123543	1	1q21.3	IL6R	interleukin 6 receptor					yes							yes
A_16_P15300852	1	1q21.3	SHE	Src homology 2 domain containing E					yes							yes
A_14_P135667	1	1q21.3	CHRNB2	cholinergic receptor, nicotinic, beta 2 (neuronal)					yes							yes
A_14_P108088	1	1q21.3	ADAR	adenosine deaminase, RNA-specific					yes			0.0177812				yes	Gain
A_16_P15301364	1	1q22	KCNN3	potassium intermediate/small conductance calcium-activated channel, subfamily N, member 3					yes							yes
A_16_P00168255	1	1q22	MUC1	mucin 1, cell surface associated					yes							yes
A_16_P00168677	1	1q22	THBS3	thrombospondin 3					yes							yes
A_14_P121890	1	1q22	MTX1	metaxin 1					yes							yes
A_16_P00168711	1	1q22	GBA	glucosidase, beta; acid (includes glucosylceramidase)					yes							yes
A_16_P15302786	1	1q22	BC000349	CDNA FLJ31688 fis, clone NT2RI2005520					yes							yes
A_14_P104473	1	1q22	chr1:152018577-152018631	glucosidase, beta; acid (includes glucosylceramidase)					yes							yes
A_14_P133588	1	1q22	SCAMP3	secretory carrier membrane protein 3					yes			0.0251479				yes	Gain
A_14_P138183	1	1q22	CLK2	CDC-like kinase 2					yes			0.00481545				yes	Gain
A_16_P00168784	1	1q22	HCN3	hyperpolarization activated cyclic nucleotide-gated potassium channel 3					yes							yes
A_16_P00168827	1	1q22	FDPS	farnesyl diphosphate synthase (farnesyl pyrophosphate synthetase, dimethylallyltranstransferase, geranyltranstransferase)					yes							yes
A_14_P110134	1	1q22	RUSC1	RUN and SH3 domain containing 1					yes			0.0190029				yes	Gain
A_14_P110595	1	1q22	ASH1L	ash1 (absent, small, or homeotic)-like (Drosophila)	0.0444921				yes	Gain		0.0271366				yes	Gain
A_14_P104104	1	1q22	LOC645676	hypothetical LOC645676					yes							yes
A_16_P15303553	1	1q22	MSTO1	misato homolog 1 (Drosophila)					yes			0.0193755				yes	Gain
A_16_P00169131	1	1q22	YY1AP1	YY1 associated protein 1					yes			0.000837505				yes	Gain
A_14_P117601	1	1q22	DAP3	death associated protein 3	0.000313614				yes	Gain		0.00594305				yes	Gain
A_16_P00169202	1	1q22	chr1:152530779-152530837	misato homolog 1 (Drosophila)					yes			0.0101395				yes	Gain
A_14_P100817	1	1q22	GON4L	gon-4-like (C. elegans)					yes							yes
A_16_P00169315	1	1q22	SYT11	synaptotagmin XI					yes							yes
A_16_P00169360	1	1q22	RIT1	Ras-like without CAAX 1					yes							yes
A_16_P15304134	1	1q22	KIAA0907	KIAA0907					yes			0.0110189				yes	Gain
A_14_P111354	1	1q22	ARHGEF2	rho/rac guanine nucleotide exchange factor (GEF) 2					yes							yes
A_16_P15304366	1	1q22	SSR2	signal sequence receptor, beta (translocon-associated protein beta)					yes							yes
A_16_P00169557	1	1q22	UBQLN4	ubiquilin 4					yes			0.0365085				yes	Gain
A_14_P127074	1	1q22	MAPBPIP	mitogen-activated protein-binding protein-interacting protein					yes							yes
A_16_P00169602	1	1q22	RAB25	RAB25, member RAS oncogene family					yes							yes
A_16_P15304555	1	1q22	MEX3A	mex-3 homolog A (C. elegans)					yes							yes
A_16_P00169683	1	1q22	LMNA	lamin A/C					yes							yes
A_16_P15304805	1	1q22	SEMA4A	sema domain, immunoglobulin domain (Ig), transmembrane domain (TM) and short cytoplasmic domain, (semaphorin) 4A					yes							yes
A_16_P15304828	1	1q22	SLC25A44	solute carrier family 25, member 44					yes			0.000944641				yes	Gain
A_14_P114220	1	1q22	PMF1	polyamine-modulated factor 1					yes			0.00515394				yes	Gain
A_14_P131501	1	1q22	PAQR6	progestin and adipoQ receptor family member VI					yes							yes
A_16_P00169861	1	1q22	SMG5	Smg-5 homolog, nonsense mediated mRNA decay factor (C. elegans)					yes			0.00312571				yes	Gain
A_14_P126203	1	1q22	TMEM79	transmembrane protein 79					yes							yes
A_14_P113243	1	1q22	C1orf85	chromosome 1 open reading frame 85					yes							yes
A_16_P00169954	1	1q22	CCT3	chaperonin containing TCP1, subunit 3 (gamma)					yes			0.0326053				yes	Gain
A_16_P00170019	1	1q22	RHBG	Rh family, B glycoprotein					yes							yes
A_16_P15305336	1	1q22	C1orf61	chromosome 1 open reading frame 61					yes							yes
A_16_P15305487	1	1q22	MEF2D	myocyte enhancer factor 2D					yes							yes
A_16_P00170394	1	1q22	APOA1BP	apolipoprotein A-I binding protein					yes			0.0357825				yes	Gain
A_14_P113561	1	1q22	GPATCH4	G patch domain containing 4					yes			0.0436854				yes	Gain
A_16_P15305944	1	1q22	HAPLN2	hyaluronan and proteoglycan link protein 2					yes							yes
A_16_P15305978	1	1q23.1	BCAN	brevican					yes							yes
A_16_P00170512	1	1q23.1	NES	nestin					yes							yes
A_16_P00170554	1	1q23.1	CRABP2	cellular retinoic acid binding protein 2					yes							yes
A_16_P35320069	1	1q23.1	chr1:153502405-153502464	CDNA FLJ14144 fis, clone MAMMA1002909					yes							yes
A_14_P120697	1	1q23.1	ISG20L2	interferon stimulated exonuclease gene 20kDa-like 2					yes			0.00240584				yes	Gain
A_16_P00170620	1	1q23.1	C1orf66	chromosome 1 open reading frame 66					yes			0.0204515				yes	Gain
A_14_P105949	1	1q23.1	MRPL24	mitochondrial ribosomal protein L24					yes							yes
A_14_P111109	1	1q23.1	HDGF	hepatoma-derived growth factor (high-mobility group protein 1-like)					yes			0.00824406				yes	Gain
A_16_P00170681	1	1q23.1	PRCC	papillary renal cell carcinoma (translocation-associated)					yes							yes
A_14_P117305	1	1q23.1	SH2D2A	SH2 domain protein 2A					yes							yes
A_16_P35320685	1	1q23.1	PEAR1	platelet endothelial aggregation receptor 1					yes							yes
A_16_P15306781	1	1q23.1	C1orf92	chromosome 1 open reading frame 92					yes							yes
A_16_P15306820	1	1q23.1	ARHGEF11	Rho guanine nucleotide exchange factor (GEF) 11					yes			0.00731735				yes	Gain
A_16_P15307304	1	1q23.1	chr1:153903020-153903079	Transcribed locus	0.0182187				yes	Gain		0.0408205				yes	Gain
A_16_P00171661	1	1q23.1	FCRL5	Fc receptor-like 5					yes							yes
A_16_P15308415	1	1q23.1	FCRL3	Fc receptor-like 3					yes							yes
A_16_P15308725	1	1q23.1	CD5L	CD5 molecule-like					yes							yes
A_16_P15309436	1	1q23.1	KIRREL	kin of IRRE like (Drosophila)					yes							yes
A_16_P00172635	1	1q23.1	CD1A	CD1a molecule					yes							yes
A_16_P15309754	1	1q23.1	CD1C	CD1c molecule					yes							yes
A_16_P15309820	1	1q23.1	CD1E	CD1e molecule					yes							yes
A_16_P15310964	1	1q23.1	MNDA	myeloid cell nuclear differentiation antigen					yes							yes
A_16_P35325491	1	1q23.1	IFI16	interferon, gamma-inducible protein 16					yes							yes
A_14_P105264	1	1q23.1	AIM2	absent in melanoma 2					yes							yes
A_14_P132596	1	1q23.2	DARC	Duffy blood group, chemokine receptor					yes							yes
A_14_P133250	1	1q23.2	FCER1A	Fc fragment of IgE, high affinity I, receptor for; alpha polypeptide					yes							yes
A_16_P15312896	1	1q23.2	DUSP23	dual specificity phosphatase 23		0.0340331			yes	Amp						yes
A_16_P00174645	1	1q23.2	SLAMF8	SLAM family member 8					yes							yes
A_16_P15313171	1	1q23.2	chr1:156647474-156647533	Transcribed locus					yes							yes
A_14_P126931	1	1q23.2	CCDC19	coiled-coil domain containing 19					yes							yes
A_16_P35327610	1	1q23.2	TAGLN2	transgelin 2					yes			0.0326594				yes	Gain
A_16_P00174834	1	1q23.2	IGSF9	immunoglobulin superfamily, member 9					yes							yes
A_16_P15313613	1	1q23.2	chr1:156804533-156804592	CDNA clone IMAGE:5302913					yes							yes
A_14_P119545	1	1q23.2	PIGM	phosphatidylinositol glycan anchor biosynthesis, class M					yes			0.0316146				yes	Gain
A_14_P137800	1	1q23.2	IGSF8	immunoglobulin superfamily, member 8					yes							yes
A_16_P35328362	1	1q23.2	ATP1A4	ATPase, Na+/K+ transporting, alpha 4 polypeptide					yes							yes
A_14_P136774	1	1q23.2	PEA15	phosphoprotein enriched in astrocytes 15					yes							yes
A_16_P35328602	1	1q23.2	WDR42A	WD repeat domain 42A					yes			0.013622				yes	Gain
A_16_P15314369	1	1q23.2	PEX19	peroxisomal biogenesis factor 19					yes							yes
A_16_P00175471	1	1q23.2	COPA	coatomer protein complex, subunit alpha					yes			0.000233058				yes	Gain
A_14_P106717	1	1q23.2	NCSTN	nicastrin					yes			0.00218683				yes	Gain
A_16_P00175662	1	1q23.2	VANGL2	vang-like 2 (van gogh, Drosophila)					yes							yes
A_16_P00175754	1	1q23.2	SLAMF6	SLAM family member 6					yes							yes
A_16_P15314939	1	1q23.3	chr1:157319654-157319713	Transcribed locus					yes							yes
A_16_P35329430	1	1q23.3	CD84	CD84 molecule					yes							yes
A_14_P129334	1	1q23.3	SLAMF1	signaling lymphocytic activation molecule family member 1					yes							yes
A_16_P35329730	1	1q23.3	CD48	CD48 molecule					yes							yes
A_16_P00176026	1	1q23.3	SLAMF7	SLAM family member 7					yes							yes
A_16_P35330144	1	1q23.3	ITLN1	intelectin 1 (galactofuranose binding)					yes							yes
A_14_P119407	1	1q23.3	chr1:157761912-157761971	Transcribed locus					yes							yes
A_16_P15315812	1	1q23.3	chr1:157769567-157769626	Transcribed locus					yes							yes
A_14_P125771	1	1q23.3	F11R	F11 receptor					yes			0.0180947				yes	Gain
A_14_P136786	1	1q23.3	PVRL4	poliovirus receptor-related 4					yes							yes
A_16_P00176430	1	1q23.3	KLHDC9	kelch domain containing 9					yes							yes
A_16_P00176447	1	1q23.3	PFDN2	prefoldin subunit 2					yes			0.0347758				yes	Gain
A_16_P15316125	1	1q23.3	DEDD	death effector domain containing					yes			0.010603				yes	Gain
A_16_P35330775	1	1q23.3	UFC1	ubiquitin-fold modifier conjugating enzyme 1					yes			0.00700335				yes	Gain
A_14_P118597	1	1q23.3	USP21	ubiquitin specific peptidase 21					yes			0.000806546				yes	Gain
A_14_P121393	1	1q23.3	PPOX	protoporphyrinogen oxidase					yes							yes
A_14_P111122	1	1q23.3	B4GALT3	UDP-Gal:betaGlcNAc beta 1,4- galactosyltransferase, polypeptide 3					yes			0.0013752				yes	Gain
A_16_P15316370	1	1q23.3	NDUFS2	NADH dehydrogenase (ubiquinone) Fe-S protein 2, 49kDa (NADH-coenzyme Q reductase)					yes			0.00069395				yes	Gain
A_14_P128844	1	1q23.3	FCER1G	Fc fragment of IgE, high affinity I, receptor for; gamma polypeptide					yes							yes
A_14_P118993	1	1q23.3	TOMM40L	translocase of outer mitochondrial membrane 40 homolog (yeast)-like					yes			0.0393968				yes	Gain
A_16_P00176704	1	1q23.3	BC028905	Transcribed locus					yes							yes
A_14_P124808	1	1q23.3	PCP4L1	Purkinje cell protein 4 like 1					yes							yes
A_16_P00176764	1	1q23.3	SDHC	succinate dehydrogenase complex, subunit C, integral membrane protein, 15kDa					yes			0.0128667				yes	Gain
A_16_P35331419	1	1q23.3	C1orf192	CDNA FLJ13332 fis, clone OVARC1001813					yes							yes
A_16_P00176917	1	1q23.3	FCGR2A	Fc fragment of IgG, low affinity IIa, receptor (CD32)					yes							yes
A_16_P00176938	1	1q23.3	HSPA6	heat shock 70kDa protein 6 (HSP70B')					yes							yes
A_16_P15317094	1	1q23.3	FCGR3B	Fc fragment of IgG, low affinity IIIb, receptor (CD16b)					yes							yes
A_16_P15317205	1	1q23.3	FCGR2B	Fc fragment of IgG, low affinity IIb, receptor (CD32)					yes							yes
A_16_P00177771	1	1q23.3	NOS1AP	nitric oxide synthase 1 (neuronal) adaptor protein					yes							yes
A_16_P15319155	1	1q23.3	FLJ13137	hypothetical gene supported by AK125122					yes							yes
A_16_P15319341	1	1q23.3	UHMK1	U2AF homology motif (UHM) kinase 1					yes							yes
A_16_P15319422	1	1q23.3	AL137257	Homo sapiens, Similar to likely ortholog of yeast ARV1, clone IMAGE:3460560, mRNA	0.0148842				yes	Gain						yes
A_14_P129276	1	1q23.3	UAP1	UDP-N-acteylglucosamine pyrophosphorylase 1					yes							yes
A_16_P15320118	1	1q23.3	DDR2	Discoidin domain receptor family, member 2					yes							yes
A_16_P00178776	1	1q23.3	HSD17B7	hydroxysteroid (17-beta) dehydrogenase 7	0.0414589				yes	Gain						yes
A_16_P00179131	1	1q23.3	RGS4	regulator of G-protein signaling 4					yes							yes
A_14_P129400	1	1q23.3	RGS5	regulator of G-protein signaling 5					yes							yes
A_14_P108397	1	1q23.3	NUF2	NUF2, NDC80 kinetochore complex component, homolog (S. cerevisiae)		0.0340331			yes	Amp						yes
A_16_P00180985	1	1q23.3	PBX1	pre-B-cell leukemia homeobox 1		0.0339411			yes	Amp						yes
A_16_P15327044	1	1q24.1	MGST3	microsomal glutathione S-transferase 3					yes							yes
A_16_P00182951	1	1q24.1	ALDH9A1	aldehyde dehydrogenase 9 family, member A1					yes							yes
A_16_P00183018	1	1q24.1	TMCO1	transmembrane and coiled-coil domains 1					yes			0.00593368				yes	Gain
A_16_P00183131	1	1q24.1	UCK2	uridine-cytidine kinase 2					yes							yes
A_16_P00183277	1	1q24.1	BX640859	CDNA FLJ31233 fis, clone KIDNE2004579					yes							yes
A_16_P15329628	1	1q24.1	TADA1L	transcriptional adaptor 1 (HFI1 homolog, yeast)-like					yes			0.0436854				yes	Gain
A_16_P35344925	1	1q24.1	MAEL	maelstrom homolog (Drosophila)					yes							yes
A_16_P15330513	1	1q24.2	POU2F1	POU class 2 homeobox 1					yes							yes
A_14_P133409	1	1q24.2	CD247	CD247 molecule					yes							yes
A_16_P00185472	1	1q24.2	CREG1	cellular repressor of E1A-stimulated genes 1					yes							yes
A_16_P00185576	1	1q24.2	RCSD1	RCSD domain containing 1					yes							yes
A_14_P100965	1	1q24.2	MPZL1	myelin protein zero-like 1					yes							yes
A_16_P35347358	1	1q24.2	BRP44	brain protein 44					yes							yes
A_16_P15332373	1	1q24.2	IQWD1	IQ motif and WD repeats 1					yes							yes
A_16_P15332721	1	1q24.2	GPR161	G protein-coupled receptor 161					yes							yes
A_14_P130224	1	1q24.2	TIPRL	TIP41, TOR signaling pathway regulator-like (S. cerevisiae)					yes							yes
A_16_P15332991	1	1q24.2	SFT2D2	SFT2 domain containing 2					yes							yes
A_14_P111113	1	1q24.2	AK091404	Transcribed locus					yes							yes
A_16_P00186499	1	1q24.2	TBX19	T-box 19					yes							yes
A_16_P15333750	1	1q24.2	XCL2	chemokine (C motif) ligand 2					yes							yes
A_16_P15334132	1	1q24.2	DPT	dermatopontin					yes							yes
A_16_P15335168	1	1q24.2	ATP1B1	ATPase, Na+/K+ transporting, beta 1 polypeptide					yes							yes
A_16_P00187779	1	1q24.2	NME7	non-metastatic cells 7, protein expressed in (nucleoside-diphosphate kinase)					yes							yes
A_14_P103069	1	1q24.2	BLZF1	basic leucine zipper nuclear factor 1 (JEM-1)					yes							yes
A_14_P108355	1	1q24.2	SLC19A2	solute carrier family 19 (thiamine transporter), member 2					yes							yes
A_14_P108008	1	1q24.2	F5	coagulation factor V (proaccelerin, labile factor)					yes							yes
A_14_P122687	1	1q24.2	SELP	selectin P (granule membrane protein 140kDa, antigen CD62)					yes							yes
A_16_P00188519	1	1q24.2	SELL	selectin L (lymphocyte adhesion molecule 1)					yes							yes
A_16_P35351853	1	1q24.2	SELE	selectin E (endothelial adhesion molecule 1)					yes							yes
A_16_P15336771	1	1q24.2	C1orf156	chromosome 1 open reading frame 156		0.00120942			yes	Amp						yes
A_16_P35352051	1	1q24.2	C1orf112	chromosome 1 open reading frame 112					yes							yes
A_16_P35352239	1	1q24.2	SCYL3	SCY1-like 3 (S. cerevisiae)	0.023796	0.000670836			yes	Gain/Amp		0.0237295				yes	Gain
A_14_P100440	1	1q24.2	KIFAP3	kinesin-associated protein 3	0.0447319				yes	Gain						yes
A_16_P00189668	1	1q24.2	SCYL1BP1	SCY1-like 1 binding protein 1					yes			0.00846419				yes	Gain
A_16_P35353999	1	1q24.2	PRRX1	paired related homeobox 1					yes							yes
A_16_P15339879	1	1q24.3	FMO2	flavin containing monooxygenase 2 (non-functional)					yes							yes
A_16_P35355345	1	1q24.3	FMO1	flavin containing monooxygenase 1					yes							yes
A_14_P100966	1	1q24.3	FMO4	flavin containing monooxygenase 4					yes							yes
A_14_P129006	1	1q24.3	BAT2D1	BAT2 domain containing 1					yes			0.0492975				yes	Gain
A_14_P105609	1	1q24.3	MYOC	myocilin, trabecular meshwork inducible glucocorticoid response					yes							yes
A_16_P15340885	1	1q24.3	VAMP4	vesicle-associated membrane protein 4					yes			0.0271567				yes	Gain
A_16_P15341070	1	1q24.3	KIAA0859	KIAA0859					yes			0.0498515				yes	Gain
A_16_P00191323	1	1q24.3	DNM3	dynamin 3					yes							yes
A_16_P35358147	1	1q24.3	C1orf105	chromosome 1 open reading frame 105					yes							yes
A_16_P15342931	1	1q24.3	C1orf9	chromosome 1 open reading frame 9					yes							yes
A_16_P15344302	1	1q25.1	TNFSF4	tumor necrosis factor (ligand) superfamily, member 4 (tax-transcriptionally activated glycoprotein 1, 34kDa)					yes							yes
A_16_P15344889	1	1q25.1	PRDX6	peroxiredoxin 6					yes			0.0456139				yes	Gain
A_16_P35360815	1	1q25.1	KLHL20	kelch-like 20 (Drosophila)					yes							yes
A_16_P15345422	1	1q25.1	CENPL	centromere protein L					yes							yes
A_16_P00193883	1	1q25.1	DARS2	aspartyl-tRNA synthetase 2, mitochondrial					yes							yes
A_16_P15345675	1	1q25.1	chr1:170596575-170596634	Transcribed locus					yes							yes
A_16_P15345758	1	1q25.1	RC3H1	ring finger and CCCH-type zinc finger domains 1	0.00411338				yes	Gain		0.0212379				yes	Gain
A_14_P125407	1	1q25.1	RABGAP1L	RAB GTPase activating protein 1-like					yes							yes
A_16_P15347942	1	1q25.1	CACYBP	calcyclin binding protein					yes							yes
A_14_P137189	1	1q25.1	MRPS14	mitochondrial ribosomal protein S14					yes							yes
A_16_P15348134	1	1q25.1	TNN	tenascin N					yes							yes
A_16_P00195553	1	1q25.1	KIAA0040	KIAA0040					yes							yes
A_16_P35364273	1	1q25.1	chr1:172011319-172011378	Homo sapiens, clone IMAGE:4915189, mRNA					yes							yes
A_16_P00196863	1	1q25.1	RFWD2	ring finger and WD repeat domain 2					yes			0.0350828				yes	Gain
A_14_P104389	1	1q25.2	FAM5B	family with sequence similarity 5, member B					yes							yes
A_14_P102940	1	1q25.2	LOC400796	hypothetical LOC400796					yes							yes
A_14_P134177	1	1q25.2	SEC16B	SEC16 homolog B (S. cerevisiae)					yes							yes
A_14_P108182	1	1q25.2	LOC730102	hypothetical protein LOC730102					yes							yes
A_16_P15356134	1	1q25.2	RASAL2	RAS protein activator like 2					yes							yes
A_16_P15356515	1	1q25.2	chr1:175179448-175179507	Full length insert cDNA YH97B03					yes							yes
A_16_P15357102	1	1q25.2	RALGPS2	Ral GEF with PH domain and SH3 binding motif 2					yes							yes
A_16_P00201269	1	1q25.2	FAM20B	family with sequence similarity 20, member B					yes			9.58173e-05				yes	Gain
A_16_P00201361	1	1q25.2	TOR3A	torsin family 3, member A					yes							yes
A_16_P15357945	1	1q25.2	ABL2	v-abl Abelson murine leukemia viral oncogene homolog 2 (arg, Abelson-related gene)					yes			0.00357914				yes	Gain
A_16_P35374484	1	1q25.2	SOAT1	Transcribed locus					yes							yes
A_16_P00202008	1	1q25.2	TDRD5	tudor domain containing 5					yes							yes
A_16_P35375529	1	1q25.2	TOR1AIP2	CDNA FLJ11392 fis, clone HEMBA1000575					yes			0.00972051				yes	Gain
A_14_P112346	1	1q25.2	TOR1AIP1	torsin A interacting protein 1					yes							yes
A_14_P110201	1	1q25.2	CEP350	centrosomal protein 350kDa	0.0397022				yes	Gain		0.032144				yes	Gain
A_16_P15360199	1	1q25.2	QSOX1	quiescin Q6 sulfhydryl oxidase 1					yes							yes
A_14_P138336	1	1q25.2	FLJ23867	hypothetical protein FLJ23867					yes							yes
A_16_P15360612	1	1q25.2	chr1:176982380-176982439	Transcribed locus					yes			0.0361591				yes	Gain
A_16_P15360636	1	1q25.2	ACBD6	acyl-Coenzyme A binding domain containing 6					yes			0.00894658				yes	Gain
A_14_P135537	1	1q25.3	XPR1	xenotropic and polytropic retrovirus receptor					yes							yes
A_16_P35378029	1	1q25.3	KIAA1614	KIAA1614					yes							yes
A_16_P15362058	1	1q25.3	STX6	syntaxin 6					yes							yes
A_14_P109497	1	1q25.3	MR1	major histocompatibility complex, class I-related					yes							yes
A_16_P00203975	1	1q25.3	IER5	immediate early response 5					yes							yes
A_16_P15365445	1	1q25.3	chr1:179078869-179078928	Transcribed locus					yes							yes
A_16_P15365495	1	1q25.3	GLUL	glutamate-ammonia ligase (glutamine synthetase)					yes							yes
A_16_P15366381	1	1q25.3	NPL	N-acetylneuraminate pyruvate lyase (dihydrodipicolinate synthase)					yes							yes
A_14_P121408	1	1q25.3	DHX9	DEAH (Asp-Glu-Ala-His) box polypeptide 9					yes							yes
A_16_P15366937	1	1q25.3	LAMC1	laminin, gamma 1 (formerly LAMB2)					yes							yes
A_14_P135136	1	1q25.3	LAMC2	laminin, gamma 2					yes							yes
A_16_P00207099	1	1q25.3	NMNAT2	nicotinamide nucleotide adenylyltransferase 2					yes							yes
A_16_P15368351	1	1q25.3	SMG7	Smg-7 homolog, nonsense mediated mRNA decay factor (C. elegans)					yes			0.0318578				yes	Gain
A_14_P102200	1	1q25.3	NCF2	neutrophil cytosolic factor 2 (65kDa, chronic granulomatous disease, autosomal 2)					yes							yes
A_14_P127894	1	1q25.3	ARPC5	actin related protein 2/3 complex, subunit 5, 16kDa					yes							yes
A_16_P35385439	1	1q25.3	chr1:180500874-180500933	ral guanine nucleotide dissociation stimulator-like 1					yes							yes
A_16_P15369712	1	1q25.3	C1orf19	chromosome 1 open reading frame 19					yes							yes
A_16_P15370471	1	1q25.3	C1orf21	chromosome 1 open reading frame 21					yes							yes
A_16_P00209326	1	1q25.3	EDEM3	ER degradation enhancer, mannosidase alpha-like 3					yes							yes
A_16_P15371611	1	1q25.3	FAM129A	family with sequence similarity 129, member A					yes							yes
A_16_P35388932	1	1q25.3	C1orf25	chromosome 1 open reading frame 25					yes							yes
A_16_P35389088	1	1q25.3	C1orf26	chromosome 1 open reading frame 26					yes							yes
A_14_P129398	1	1q25.3	IVNS1ABP	influenza virus NS1A binding protein					yes							yes
A_16_P15375091	1	1q31.1	HMCN1	hemicentin 1					yes							yes
A_16_P15375384	1	1q31.1	TPR	translocated promoter region (to activated MET oncogene)					yes			0.0306616				yes	Gain
A_16_P15375588	1	1q31.1	C1orf27	chromosome 1 open reading frame 27	0.0148842				yes	Gain		0.0111512				yes	Gain
A_16_P00212249	1	1q31.1	PTGS2	prostaglandin-endoperoxide synthase 2 (prostaglandin G/H synthase and cyclooxygenase)					yes							yes
A_16_P15376592	1	1q31.1	PLA2G4A	phospholipase A2, group IVA (cytosolic, calcium-dependent)					yes							yes
A_16_P35400806	1	1q31.1	FAM5C	family with sequence similarity 5, member C					yes							yes
A_16_P15389598	1	1q31.2	RGS1	regulator of G-protein signaling 1					yes							yes
A_16_P15390173	1	1q31.2	RGS2	regulator of G-protein signaling 2, 24kDa					yes							yes
A_14_P100344	1	1q31.2	UCHL5	ubiquitin carboxyl-terminal hydrolase L5					yes							yes
A_14_P112927	1	1q31.2	TROVE2	TROVE domain family, member 2					yes			0.00908124				yes	Gain
A_16_P15390910	1	1q31.2	GLRX2	glutaredoxin 2					yes							yes
A_16_P15390944	1	1q31.2	CDC73	cell division cycle 73, Paf1/RNA polymerase II complex component, homolog (S. cerevisiae)					yes							yes
A_16_P15398003	1	1q31.3	KCNT2	Potassium channel, subfamily T, member 2					yes							yes
A_16_P15398904	1	1q31.3	CFH	complement factor H					yes							yes
A_16_P35416144	1	1q31.3	chr1:193513242-193513301	complement factor H					yes							yes
A_16_P15399795	1	1q31.3	ASPM	asp (abnormal spindle) homolog, microcephaly associated (Drosophila)					yes							yes
A_16_P35417814	1	1q31.3	chr1:194194978-194195037	CDNA FLJ36663 fis, clone UTERU2002826					yes							yes
A_16_P15400848	1	1q31.3	C1orf218	chromosome 1 open reading frame 218					yes							yes
A_16_P15401771	1	1q31.3	C1orf53	chromosome 1 open reading frame 53					yes							yes
A_16_P15402810	1	1q31.3	PTPRC	protein tyrosine phosphatase, receptor type, C					yes							yes
A_16_P00230952	1	1q32.1	BC040731	Transcribed locus					yes							yes
A_16_P15407997	1	1q32.1	ZNF281	Zinc finger protein 281					yes			0.0453315				yes	Gain
A_16_P15408387	1	1q32.1	KIF14	kinesin family member 14					yes							yes
A_16_P15408610	1	1q32.1	DDX59	DEAD (Asp-Glu-Ala-Asp) box polypeptide 59					yes							yes
A_16_P15409095	1	1q32.1	CAMSAP1L1	calmodulin regulated spectrin-associated protein 1-like 1					yes							yes
A_14_P138242	1	1q32.1	C1orf106	chromosome 1 open reading frame 106					yes							yes
A_16_P15409402	1	1q32.1	KIF21B	kinesin family member 21B					yes							yes
A_16_P00231997	1	1q32.1	TMEM9	transmembrane protein 9					yes							yes
A_14_P126075	1	1q32.1	PKP1	plakophilin 1 (ectodermal dysplasia/skin fragility syndrome)					yes							yes
A_16_P15410643	1	1q32.1	LAD1	ladinin 1					yes							yes
A_16_P00232733	1	1q32.1	chr1:198160432-198160489	CDNA clone IMAGE:5723825					yes							yes
A_14_P123682	1	1q32.1	PHLDA3	pleckstrin homology-like domain, family A, member 3					yes							yes
A_16_P00232762	1	1q32.1	CSRP1	cysteine and glycine-rich protein 1					yes							yes
A_14_P107666	1	1q32.1	NAV1	neuron navigator 1					yes							yes
A_16_P00233433	1	1q32.1	IPO9	importin 9					yes			0.00287191				yes	Gain
A_16_P00233479	1	1q32.1	TMEM58	transmembrane protein 58					yes							yes
A_16_P00233500	1	1q32.1	LMOD1	leiomodin 1 (smooth muscle)					yes							yes
A_16_P00233569	1	1q32.1	ELF3	E74-like factor 3 (ets domain transcription factor, epithelial-specific )					yes							yes
A_14_P130083	1	1q32.1	ARL8A	ADP-ribosylation factor-like 8A					yes							yes
A_16_P15412617	1	1q32.1	PTPN7	protein tyrosine phosphatase, non-receptor type 7					yes							yes
A_16_P00233881	1	1q32.1	LGR6	leucine-rich repeat-containing G protein-coupled receptor 6					yes							yes
A_14_P109654	1	1q32.1	UBE2T	ubiquitin-conjugating enzyme E2T (putative)					yes							yes
A_16_P15413185	1	1q32.1	PPP1R12B	protein phosphatase 1, regulatory (inhibitor) subunit 12B					yes							yes
A_14_P125914	1	1q32.1	RABIF	RAB interacting factor					yes			0.0303621				yes	Gain
A_16_P15414662	1	1q32.1	KLHL12	kelch-like 12 (Drosophila)	0.00383802				yes	Gain		0.0168092				yes	Gain
A_16_P15414757	1	1q32.1	ADIPOR1	adiponectin receptor 1					yes							yes
A_16_P00234925	1	1q32.1	CYB5R1	cytochrome b5 reductase 1					yes							yes
A_16_P15414915	1	1q32.1	TMEM183A	transmembrane protein 183A					yes							yes
A_14_P124066	1	1q32.1	PPFIA4	protein tyrosine phosphatase, receptor type, f polypeptide (PTPRF), interacting protein (liprin), alpha 4					yes							yes
A_16_P15415192	1	1q32.1	ADORA1	adenosine A1 receptor					yes							yes
A_16_P00235292	1	1q32.1	CHI3L1	chitinase 3-like 1 (cartilage glycoprotein-39)					yes							yes
A_16_P00235332	1	1q32.1	CHIT1	chitinase 1 (chitotriosidase)					yes							yes
A_14_P135005	1	1q32.1	BTG2	BTG family, member 2					yes							yes
A_16_P00235509	1	1q32.1	FMOD	fibromodulin					yes							yes
A_16_P15416122	1	1q32.1	PRELP	proline/arginine-rich end leucine-rich repeat protein					yes							yes
A_16_P35434506	1	1q32.1	ATP2B4	ATPase, Ca++ transporting, plasma membrane 4					yes							yes
A_14_P123051	1	1q32.1	LAX1	lymphocyte transmembrane adaptor 1					yes							yes
A_16_P15417031	1	1q32.1	ZC3H11A	zinc finger CCCH-type containing 11A	0.00443838				yes	Gain		0.00502483				yes	Gain
A_16_P00236292	1	1q32.1	SNRPE	small nuclear ribonucleoprotein polypeptide E					yes			0.0326594				yes	Gain
A_14_P125431	1	1q32.1	SOX13	SRY (sex determining region Y)-box 13					yes							yes
A_16_P15417644	1	1q32.1	ETNK2	ethanolamine kinase 2					yes							yes
A_16_P00236692	1	1q32.1	GOLT1A	golgi transport 1 homolog A (S. cerevisiae)					yes							yes
A_14_P137927	1	1q32.1	PLEKHA6	pleckstrin homology domain containing, family A member 6					yes							yes
A_16_P35436089	1	1q32.1	PPP1R15B	protein phosphatase 1, regulatory (inhibitor) subunit 15B					yes			0.00989159				yes	Gain
A_16_P15418440	1	1q32.1	PIK3C2B	phosphoinositide-3-kinase, class 2, beta polypeptide					yes							yes
A_16_P00237887	1	1q32.1	NFASC	neurofascin homolog (chicken)					yes							yes
A_14_P117858	1	1q32.1	RBBP5	retinoblastoma binding protein 5					yes							yes
A_16_P35438264	1	1q32.1	RIPK5	receptor interacting protein kinase 5	0.0447319				yes	Gain						yes
A_16_P35438442	1	1q32.1	TMCC2	transmembrane and coiled-coil domain family 2					yes							yes
A_16_P00238501	1	1q32.1	chr1:201995465-201995521	chromosome 11 open reading frame 17					yes							yes
A_16_P00238556	1	1q32.1	KLHDC8A	kelch domain containing 8A					yes							yes
A_16_P15421059	1	1q32.1	LEMD1	LEM domain containing 1					yes							yes
A_16_P00238705	1	1q32.1	AK026628	CDNA FLJ12532 fis, clone NT2RM4000200					yes							yes
A_16_P15421332	1	1q32.1	PCTK3	PCTAIRE protein kinase 3					yes							yes
A_14_P136612	1	1q32.1	MFSD4	major facilitator superfamily domain containing 4					yes							yes
A_14_P127696	1	1q32.1	SLC45A3	solute carrier family 45, member 3					yes							yes
A_14_P139395	1	1q32.1	NUCKS1	nuclear casein kinase and cyclin-dependent kinase substrate 1					yes							yes
A_16_P00239232	1	1q32.1	RAB7L1	RAB7, member RAS oncogene family-like 1					yes							yes
A_16_P00239269	1	1q32.1	SLC41A1	solute carrier family 41, member 1					yes							yes
A_16_P15422326	1	1q32.1	SLC26A9	solute carrier family 26, member 9					yes							yes
A_16_P00239519	1	1q32.1	AVPR1B	arginine vasopressin receptor 1B					yes							yes
A_16_P00239541	1	1q32.1	C1orf186	chromosome 1 open reading frame 186					yes							yes
A_16_P35440872	1	1q32.1	SRGAP2	SLIT-ROBO Rho GTPase activating protein 2					yes							yes
A_16_P00239804	1	1q32.1	IKBKE	inhibitor of kappa light polypeptide gene enhancer in B-cells, kinase epsilon					yes							yes
A_16_P15423332	1	1q32.1	RASSF5	Ras association (RalGDS/AF-6) domain family 5					yes							yes
A_16_P35441608	1	1q32.1	LGTN	ligatin					yes							yes
A_16_P00240095	1	1q32.1	DYRK3	dual-specificity tyrosine-(Y)-phosphorylation regulated kinase 3					yes							yes
A_14_P100433	1	1q32.1	MAPKAPK2	mitogen-activated protein kinase-activated protein kinase 2					yes			0.010603				yes	Gain
A_14_P126830	1	1q32.1	IL19	interleukin 19					yes							yes
A_16_P15424280	1	1q32.1	IL20	interleukin 20					yes							yes
A_14_P105163	1	1q32.1	IL24	interleukin 24					yes							yes
A_16_P00240524	1	1q32.1	FAIM3	Fas apoptotic inhibitory molecule 3					yes							yes
A_16_P15424460	1	1q32.1	chr1:203488055-203488114	Transcribed locus					yes							yes
A_16_P00240568	1	1q32.1	PIGR	polymeric immunoglobulin receptor					yes							yes
A_16_P35442798	1	1q32.1	C1orf116	chromosome 1 open reading frame 116					yes							yes
A_16_P15424789	1	1q32.2	YOD1	YOD1 OTU deubiquinating enzyme 1 homolog (S. cerevisiae)					yes							yes
A_16_P35443064	1	1q32.2	C4BPB	complement component 4 binding protein, beta					yes							yes
A_14_P121791	1	1q32.2	C4BPA	complement component 4 binding protein, alpha					yes							yes
A_16_P00241138	1	1q32.2	CD55	CD55 molecule, decay accelerating factor for complement (Cromer blood group)					yes							yes
A_14_P126654	1	1q32.2	CR2	complement component (3d/Epstein Barr virus) receptor 2					yes							yes
A_16_P15426190	1	1q32.2	CR1	complement component (3b/4b) receptor 1 (Knops blood group)					yes							yes
A_16_P00241620	1	1q32.2	CD46	CD46 molecule, complement regulatory protein					yes							yes
A_16_P00241689	1	1q32.2	chr1:204359744-204359803	CDNA FLJ41270 fis, clone BRAMY2036387					yes							yes
A_16_P00241844	1	1q32.2	CD34	CD34 molecule					yes							yes
A_16_P00242081	1	1q32.2	PLXNA2	plexin A2					yes							yes
A_16_P35449196	1	1q32.2	LOC642587	NPC-A-5					yes							yes
A_16_P15431364	1	1q32.2	LAMB3	laminin, beta 3					yes							yes
A_16_P15431487	1	1q32.2	chr1:206225115-206225174	Transcribed locus					yes							yes
A_14_P121171	1	1q32.2	HSD11B1	hydroxysteroid (11-beta) dehydrogenase 1					yes							yes
A_16_P15431687	1	1q32.2	TRAF3IP3	TRAF3 interacting protein 3					yes							yes
A_14_P130537	1	1q32.2	C1orf74	chromosome 1 open reading frame 74					yes							yes
A_16_P35450175	1	1q32.2	IRF6	interferon regulatory factor 6					yes			0.0250371				yes	Gain
A_16_P35450279	1	1q32.2	C1orf107	chromosome 1 open reading frame 107					yes			0.0109258				yes	Gain
A_16_P15432776	1	1q32.2	C1orf133	chromosome 1 open reading frame 133					yes							yes
A_16_P00245507	1	1q32.2	SERTAD4	SERTA domain containing 4					yes							yes
A_14_P131124	1	1q32.2	HHAT	hedgehog acyltransferase	0.0453469				yes	Gain						yes
A_14_P128936	1	1q32.3	RCOR3	REST corepressor 3					yes			0.0229648				yes	Gain
A_14_P126851	1	1q32.3	TRAF5	TNF receptor-associated factor 5					yes			0.0137254				yes	Gain
A_16_P15435386	1	1q32.3	C1orf97	chromosome 1 open reading frame 97					yes							yes
A_16_P15435592	1	1q32.3	chr1:208073724-208073783	Homo sapiens, clone IMAGE:4780252, mRNA					yes							yes
A_16_P35454229	1	1q32.3	SLC30A1	Solute carrier family 30 (zinc transporter), member 1					yes							yes
A_16_P00247424	1	1q32.3	NEK2	NIMA (never in mitosis gene a)-related kinase 2					yes							yes
A_16_P15436037	1	1q32.3	LOC91548	hypothetical protein LOC91548					yes							yes
A_14_P136437	1	1q32.3	LPGAT1	lysophosphatidylglycerol acyltransferase 1					yes			0.032144				yes	Gain
A_16_P00247892	1	1q32.3	INTS7	integrator complex subunit 7					yes			0.0100001				yes	Gain
A_14_P139799	1	1q32.3	DTL	denticleless homolog (Drosophila)					yes			0.0424874				yes	Gain
A_14_P124982	1	1q32.3	C1orf75	chromosome 1 open reading frame 75					yes							yes
A_16_P15437659	1	1q32.3	NENF	neuron derived neurotrophic factor	0.040885				yes	Gain		0.040365				yes	Gain
A_16_P15437997	1	1q32.3	chr1:209118029-209118088	Full-length cDNA clone CS0DI011YD16 of Placenta Cot 25-normalized of Homo sapiens (human)					yes							yes
A_16_P15438122	1	1q32.3	ATF3	activating transcription factor 3					yes							yes
A_16_P00248811	1	1q32.3	BATF3	basic leucine zipper transcription factor, ATF-like 3					yes							yes
A_16_P15438607	1	1q32.3	TATDN3	TatD DNase domain containing 3	0.00691497				yes	Gain		0.042331				yes	Gain
A_16_P15438672	1	1q32.3	LQK1	LQK1 hypothetical protein short isoform					yes							yes
A_16_P15438687	1	1q32.3	FLVCR1	feline leukemia virus subgroup C cellular receptor 1					yes			0.0130319				yes	Gain
A_16_P15438844	1	1q32.3	VASH2	vasohibin 2					yes							yes
A_14_P106718	1	1q32.3	ANGEL2	angel homolog 2 (Drosophila)					yes			0.0140823				yes	Gain
A_16_P00249446	1	1q32.3	RPS6KC1	ribosomal protein S6 kinase, 52kDa, polypeptide 1	0.0148842				yes	Gain		0.00822535				yes	Gain
A_16_P15442299	1	1q41	SMYD2	CDNA FLJ12119 fis, clone MAMMA1000092					yes							yes
A_16_P35461140	1	1q41	chr1:210909618-210909677	Full length insert cDNA clone ZE03F06					yes							yes
A_16_P15442477	1	1q41	chr1:210916186-210916245	---					yes							yes
A_14_P201983	1	1q41	CENPF	centromere protein F, 350/400ka (mitosin)					yes							yes
A_14_P200938	1	1q41	KCNK2	potassium channel, subfamily K, member 2					yes							yes
A_16_P15445376	1	1q41	KCTD3	potassium channel tetramerisation domain containing 3					yes							yes
A_14_P201532	1	1q41	ESRRG	estrogen-related receptor gamma					yes							yes
A_16_P15450491	1	1q41	chr1:213982209-213982268	CDNA FLJ41751 fis, clone HSYRA2008154					yes							yes
A_14_P115849	1	1q41	GPATCH2	G patch domain containing 2					yes							yes
A_14_P111752	1	1q41	SPATA17	spermatogenesis associated 17					yes							yes
A_14_P134449	1	1q41	RRP15	ribosomal RNA processing 15 homolog (S. cerevisiae)	0.0337246				yes	Gain		0.0318578				yes	Gain
A_16_P00258909	1	1q41	LYPLAL1	lysophospholipase-like 1					yes							yes
A_16_P15456820	1	1q41	EPRS	glutamyl-prolyl-tRNA synthetase					yes							yes
A_14_P123254	1	1q41	BPNT1	3'(2'), 5'-bisphosphate nucleotidase 1	0.0212635				yes	Gain						yes
A_16_P00260260	1	1q41	IARS2	isoleucyl-tRNA synthetase 2, mitochondrial	0.0256771				yes	Gain		0.0379577				yes	Gain
A_14_P126537	1	1q41	AK021928	Full-length cDNA clone CS0DC007YG11 of Neuroblastoma Cot 25-normalized of Homo sapiens (human)	0.023613				yes	Gain		7.51276e-06				yes	Gain
A_16_P15458232	1	1q41	MARK1	MAP/microtubule affinity-regulating kinase 1					yes							yes
A_16_P15458634	1	1q41	C1orf115	chromosome 1 open reading frame 115					yes							yes
A_16_P35477797	1	1q41	MOSC2	MOCO sulphurase C-terminal domain containing 2					yes							yes
A_16_P15458892	1	1q41	MOSC1	MOCO sulphurase C-terminal domain containing 1					yes							yes
A_16_P15459050	1	1q41	HLX	H2.0-like homeobox					yes							yes
A_16_P00262510	1	1q41	DUSP10	dual specificity phosphatase 10					yes							yes
A_16_P35482235	1	1q41	MIA3	melanoma inhibitory activity family, member 3					yes							yes
A_14_P115492	1	1q41	C1orf80	chromosome 1 open reading frame 80					yes							yes
A_14_P127398	1	1q41	DISP1	dispatched homolog 1 (Drosophila)					yes							yes
A_14_P132961	1	1q41	SUSD4	sushi domain containing 4					yes							yes
A_16_P15465440	1	1q42.11	CAPN2	calpain 2, (m/II) large subunit					yes							yes
A_14_P130957	1	1q42.11	TP53BP2	tumor protein p53 binding protein, 2					yes							yes
A_14_P201484	1	1q42.11	chr1:220340998-220341057	Transcribed locus, moderately similar to XP_001093747.1 PREDICTED: tumor protein p53 binding protein, 2 [Macaca mulatta]					yes							yes
A_16_P15465945	1	1q42.11	LOC441124	hypothetical gene supported by AK093729; BX647918					yes							yes
A_16_P00263912	1	1q42.12	FBXO28	F-box protein 28					yes			0.00882615				yes	Gain
A_16_P00264001	1	1q42.12	DEGS1	degenerative spermatocyte homolog 1, lipid desaturase (Drosophila)					yes							yes
A_14_P111697	1	1q42.12	NVL	nuclear VCP-like					yes			0.0220127				yes	Gain
A_16_P00264190	1	1q42.12	CNIH4	cornichon homolog 4 (Drosophila)					yes							yes
A_16_P35486279	1	1q42.12	WDR26	WD repeat domain 26					yes			0.0331283				yes	Gain
A_16_P15467329	1	1q42.12	CNIH3	cornichon homolog 3 (Drosophila)					yes							yes
A_16_P35487670	1	1q42.12	chr1:221524231-221524290	Transcribed locus					yes			0.0260142				yes	Gain
A_16_P15468894	1	1q42.12	LBR	lamin B receptor					yes							yes
A_16_P15469189	1	1q42.12	ENAH	enabled homolog (Drosophila)					yes							yes
A_16_P15469870	1	1q42.12	SRP9	signal recognition particle 9kDa					yes			0.04371				yes	Gain
A_16_P15469954	1	1q42.12	EPHX1	epoxide hydrolase 1, microsomal (xenobiotic)					yes							yes
A_16_P00266056	1	1q42.12	TMEM63A	transmembrane protein 63A					yes							yes
A_16_P00266159	1	1q42.12	PYCR2	pyrroline-5-carboxylate reductase family, member 2					yes			0.0289602				yes	Gain
A_16_P15470271	1	1q42.12	LEFTY2	left-right determination factor 2					yes							yes
A_16_P15470384	1	1q42.12	C1orf55	chromosome 1 open reading frame 55					yes							yes
A_16_P00266353	1	1q42.12	H3F3A	H3 histone, family 3A					yes							yes
A_16_P00266436	1	1q42.12	ACBD3	acyl-Coenzyme A binding domain containing 3					yes			0.0446175				yes	Gain
A_14_P116284	1	1q42.12	PARP1	poly (ADP-ribose) polymerase family, member 1					yes							yes
A_16_P00267080	1	1q42.12	ITPKB	inositol 1,4,5-trisphosphate 3-kinase B					yes							yes
A_14_P104189	1	1q42.13	CDC42BPA	CDC42 binding protein kinase alpha (DMPK-like)					yes							yes
A_16_P15473106	1	1q42.13	chr1:223607059-223607117	CDC42 binding protein kinase alpha (DMPK-like)					yes							yes
A_16_P00268503	1	1q42.13	C1orf142	chromosome 1 open reading frame 142					yes			0.000837505				yes	Gain
A_16_P00268720	1	1q42.13	WNT9A	Wingless-type MMTV integration site family, member 9A					yes							yes
A_14_P111813	1	1q42.13	ARF1	ADP-ribosylation factor 1					yes							yes
A_14_P115866	1	1q42.13	C1orf35	chromosome 1 open reading frame 35					yes			0.0136356				yes	Gain
A_14_P130561	1	1q42.13	MRPL55	mitochondrial ribosomal protein L55					yes							yes
A_16_P15475230	1	1q42.13	GUK1	guanylate kinase 1					yes							yes
A_16_P15475281	1	1q42.13	GJC2	gap junction protein, gamma 2, 47kDa					yes							yes
A_16_P00269054	1	1q42.13	C1orf69	chromosome 1 open reading frame 69					yes							yes
A_16_P15475761	1	1q42.13	chr1:224843427-224843486	Transcribed locus					yes							yes
A_16_P35495611	1	1q42.13	TRIM11	tripartite motif-containing 11					yes			0.0150316				yes	Gain
A_16_P15476026	1	1q42.13	HIST3H2A	histone cluster 3, H2a					yes							yes
A_16_P00269481	1	1q42.13	RNF187	ring finger protein 187					yes			0.0108829				yes	Gain
A_16_P35496214	1	1q42.13	RHOU	ras homolog gene family, member U					yes							yes
A_16_P00270309	1	1q42.13	RAB4A	RAB4A, member RAS oncogene family					yes							yes
A_16_P15477888	1	1q42.13	C1orf96	chromosome 1 open reading frame 96					yes							yes
A_14_P121813	1	1q42.13	ACTA1	actin, alpha 1, skeletal muscle					yes							yes
A_16_P35497951	1	1q42.13	NUP133	nucleoporin 133kDa	0.0254183				yes	Gain		0.00102381				yes	Gain
A_16_P15478353	1	1q42.13	ABCB10	ATP-binding cassette, sub-family B (MDR/TAP), member 10					yes							yes
A_14_P103179	1	1q42.13	TAF5L	TAF5-like RNA polymerase II, p300/CBP-associated factor (PCAF)-associated factor, 65kDa					yes			0.013622				yes	Gain
A_16_P35498475	1	1q42.13	KIAA0133	KIAA0133					yes			0.0351043				yes	Gain
A_16_P15479601	1	1q42.13	GALNT2	UDP-N-acetyl-alpha-D-galactosamine:polypeptide N-acetylgalactosaminyltransferase 2 (GalNAc-T2)					yes			0.0349031				yes	Gain
A_16_P15480321	1	1q42.13	PGBD5	piggyBac transposable element derived 5					yes							yes
A_16_P15480975	1	1q42.2	COG2	component of oligomeric golgi complex 2					yes			0.00593368				yes	Gain
A_16_P00272323	1	1q42.2	CAPN9	calpain 9					yes							yes
A_16_P15481493	1	1q42.2	C1orf198	chromosome 1 open reading frame 198					yes							yes
A_16_P00272586	1	1q42.2	TTC13	tetratricopeptide repeat domain 13					yes			0.0207367				yes	Gain
A_16_P00272728	1	1q42.2	ARV1	ARV1 homolog (S. cerevisiae)					yes			0.0279531				yes	Gain
A_16_P00272797	1	1q42.2	FAM89A	family with sequence similarity 89, member A					yes							yes
A_14_P108942	1	1q42.2	C1orf131	chromosome 1 open reading frame 131					yes			0.010603				yes	Gain
A_16_P35502492	1	1q42.2	GNPAT	glyceronephosphate O-acyltransferase					yes			0.00205616				yes	Gain
A_16_P35502700	1	1q42.2	chr1:227770444-227770503	CDNA FLJ37844 fis, clone BRSSN2012622					yes							yes
A_14_P111529	1	1q42.2	EXOC8	exocyst complex component 8					yes			0.0326594				yes	Gain
A_16_P15482802	1	1q42.2	chr1:227800675-227800734	CDNA clone IMAGE:4096047					yes							yes
A_16_P15482826	1	1q42.2	EGLN1	egl nine homolog 1 (C. elegans)					yes							yes
A_16_P35503181	1	1q42.2	TSNAX	translin-associated factor X					yes			0.0354243				yes	Gain
A_16_P15483344	1	1q42.2	DISC1	disrupted in schizophrenia 1					yes							yes
A_16_P00274741	1	1q42.2	SIPA1L2	signal-induced proliferation-associated 1 like 2					yes							yes
A_16_P15486525	1	1q42.2	chr1:229264296-229264355	MRNA; cDNA DKFZp434E1812 (from clone DKFZp434E1812)					yes							yes
A_16_P00275698	1	1q42.2	C1orf57	chromosome 1 open reading frame 57					yes			0.00460382				yes	Gain
A_16_P00275774	1	1q42.2	PCNXL2	pecanex-like 2 (Drosophila)					yes							yes
A_16_P15487969	1	1q42.2	KIAA1804	mixed lineage kinase 4					yes							yes
A_16_P00276624	1	1q42.2	KCNK1	potassium channel, subfamily K, member 1					yes							yes
A_16_P15490017	1	1q42.2	SLC35F3	solute carrier family 35, member F3					yes							yes
A_16_P35510275	1	1q42.2	C1orf31	chromosome 1 open reading frame 31					yes							yes
A_16_P15490744	1	1q42.3	IRF2BP2	interferon regulatory factor 2 binding protein 2					yes			0.0428412				yes	Gain
A_14_P201046	1	1q42.3	chr1:231593585-231593644	CDNA FLJ36228 fis, clone THYMU2001139					yes			0.0216124				yes	Gain
A_16_P15492102	1	1q42.3	TOMM20	translocase of outer mitochondrial membrane 20 homolog (yeast)	0.0174342				yes	Gain						yes
A_14_P114410	1	1q42.3	RBM34	RNA binding motif protein 34					yes			0.0135323				yes	Gain
A_16_P15492305	1	1q42.3	ARID4B	AT rich interactive domain 4B (RBP1-like)					yes							yes
A_14_P123801	1	1q42.3	GGPS1	geranylgeranyl diphosphate synthase 1					yes							yes
A_16_P35512970	1	1q42.3	TBCE	tubulin folding cofactor E					yes							yes
A_16_P15493089	1	1q42.3	GNG4	guanine nucleotide binding protein (G protein), gamma 4					yes							yes
A_14_P116315	1	1q42.3	LYST	lysosomal trafficking regulator					yes							yes
A_16_P00279869	1	1q42.3	NID1	nidogen 1					yes							yes
A_16_P35514943	1	1q42.3	GPR137B	G protein-coupled receptor 137B					yes							yes
A_16_P15494732	1	1q42.3	ERO1LB	ERO1-like beta (S. cerevisiae)					yes							yes
A_14_P114517	1	1q42.3	EDARADD	EDAR-associated death domain					yes							yes
A_14_P124152	1	1q43	LGALS8	lectin, galactoside-binding, soluble, 8 (galectin 8)					yes							yes
A_16_P00280675	1	1q43	HEATR1	HEAT repeat containing 1					yes			0.0375159				yes	Gain
A_16_P15496122	1	1q43	MTR	5-methyltetrahydrofolate-homocysteine methyltransferase					yes							yes
A_16_P00281357	1	1q43	MT1P2	metallothionein 1 pseudogene 2					yes							yes
A_16_P15503933	1	1q43	CHRM3	cholinergic receptor, muscarinic 3					yes							yes
A_14_P201069	1	1q43	AK095715	CDNA FLJ38396 fis, clone FEBRA2007957					yes							yes
A_16_P15504433	1	1q43	FMN2	Formin 2					yes							yes
A_14_P126309	1	1q43	GREM2	gremlin 2, cysteine knot superfamily, homolog (Xenopus laevis)					yes							yes
A_16_P15506509	1	1q43	RGS7	regulator of G-protein signaling 7					yes							yes
A_14_P120277	1	1q43	FH	fumarate hydratase					yes							yes
A_16_P15508118	1	1q43	KMO	kynurenine 3-monooxygenase (kynurenine 3-hydroxylase)					yes							yes
A_16_P00288330	1	1q43	OPN3	opsin 3 (encephalopsin, panopsin)					yes							yes
A_16_P15508929	1	1q43	EXO1	exonuclease 1					yes							yes
A_16_P00289994	1	1q44	CEP170	centrosomal protein 170kDa					yes							yes
A_16_P00290199	1	1q44	SDCCAG8	serologically defined colon cancer antigen 8					yes			0.0179227				yes	Gain
A_16_P00291309	1	1q44	ZNF238	zinc finger protein 238					yes							yes
A_16_P15515130	1	1q44	ADSS	adenylosuccinate synthase					yes							yes
A_16_P00292286	1	1q44	FAM36A	family with sequence similarity 36, member A					yes							yes
A_16_P15515946	1	1q44	HNRNPU	heterogeneous nuclear ribonucleoprotein U (scaffold attachment factor A)					yes							yes
A_16_P35537060	1	1q44	chr1:241463783-241463842	EF-hand calcium binding domain 2					yes							yes
A_16_P00292909	1	1q44	AK125187	MRNA; cDNA DKFZp547G1518 (from clone DKFZp547G1518)					yes							yes
A_16_P00293597	1	1q44	chr1:242172995-242173053	kinesin family member 26B					yes							yes
A_14_P109963	1	1q44	AK095500	CDNA FLJ38181 fis, clone FCBBF1000125					yes							yes
A_16_P15518142	1	1q44	SMYD3	SET and MYND domain containing 3					yes							yes
A_14_P135018	1	1q44	TFB2M	transcription factor B2, mitochondrial					yes							yes
A_16_P35541435	1	1q44	C1orf71	---					yes			0.0443338				yes	Gain
A_16_P15520611	1	1q44	SCCPDH	saccharopine dehydrogenase (putative)					yes							yes
A_16_P15520726	1	1q44	LOC149134	hypothetical LOC149134					yes							yes
A_16_P15520856	1	1q44	AHCTF1	AT hook containing transcription factor 1					yes							yes
A_16_P15521317	1	1q44	CR597038	CDNA clone IMAGE:3928921					yes							yes
A_16_P15521515	1	1q44	ZNF124	zinc finger protein 124					yes							yes
A_14_P108387	1	1q44	chr1:243674828-243674887	CDNA clone IMAGE:4794941					yes							yes
A_16_P00295787	1	1q44	LOC729810	hypothetical protein LOC729810					yes							yes
A_14_P200712	1	1q44	SH3BP5L	SH3-binding domain protein 5-like					yes			0.0288446				yes	Gain
A_16_P00297306	1	1q44	ZNF692	zinc finger protein 692					yes							yes
A_16_P00297372	1	1q44	PGBD2	piggyBac transposable element derived 2					yes			0.0103148				yes	Gain
A_16_P00297410	2	2p25.3	FAM110C	family with sequence similarity 110, member C					no							no
A_16_P00297501	2	2p25.3	chr2:000092111-000092170	CDNA FLJ20178 fis, clone COL09990					no							no
A_16_P15525430	2	2p25.3	SH3YL1	SH3 domain containing, Ysc84-like 1 (S. cerevisiae)					no							no
A_14_P116779	2	2p25.3	ACP1	acid phosphatase 1, soluble					no							no
A_16_P00297758	2	2p25.3	FAM150B	family with sequence similarity 150, member B					no							no
A_16_P00298337	2	2p25.3	TMEM18	transmembrane protein 18					no							no
A_16_P15527426	2	2p25.3	LOC728176	hypothetical protein LOC728176					no							no
A_16_P35550267	2	2p25.3	PXDN	peroxidasin homolog (Drosophila)					no							no
A_16_P15532975	2	2p25.3	LOC643517	hypothetical LOC643517					no							no
A_14_P200677	2	2p25.3	RNASEH1	ribonuclease H1					no							no
A_16_P35554336	2	2p25.3	RPS7	ribosomal protein S7					no							no
A_16_P15533119	2	2p25.3	COLEC11	collectin sub-family member 11					no							no
A_16_P35558028	2	2p25.2	TSSC1	tumor suppressing subtransferable candidate 1					no							no
A_14_P102162	2	2p25.2	TTC15	tetratricopeptide repeat domain 15					no							no
A_14_P100958	2	2p25.2	ADI1	acireductone dioxygenase 1					no							no
A_16_P15539461	2	2p25.2	SOX11	SRY (sex determining region Y)-box 11					no							no
A_16_P35563824	2	2p25.2	LOC129607	hypothetical protein LOC129607					no							no
A_16_P35563887	2	2p25.2	RSAD2	radical S-adenosyl methionine domain containing 2					no							no
A_16_P00307747	2	2p25.2	LOC386597	hypothetical protein LOC386597					no							no
A_16_P00307783	2	2p25.1	RNF144A	ring finger protein 144A					no							no
A_14_P127399	2	2p25.1	ID2	inhibitor of DNA binding 2, dominant negative helix-loop-helix protein					no							no
A_16_P15547729	2	2p25.1	KIDINS220	kinase D-interacting substrate of 220 kDa					no							no
A_14_P139375	2	2p25.1	MBOAT2	membrane bound O-acyltransferase domain containing 2					no							no
A_16_P00311505	2	2p25.1	DDEF2	development and differentiation enhancing factor 2					no							no
A_16_P35570936	2	2p25.1	IAH1	isoamyl acetate-hydrolyzing esterase 1 homolog (S. cerevisiae)					no							no
A_16_P35571188	2	2p25.1	ADAM17	ADAM metallopeptidase domain 17 (tumor necrosis factor, alpha, converting enzyme)					no							no
A_14_P101593	2	2p25.1	YWHAQ	tyrosine 3-monooxygenase/tryptophan 5-monooxygenase activation protein, theta polypeptide					no							no
A_16_P35572495	2	2p25.1	GRHL1	grainyhead-like 1 (Drosophila)					no							no
A_16_P15551065	2	2p25.1	KLF11	Kruppel-like factor 11					no							no
A_16_P35572633	2	2p25.1	CYS1	cystin 1					no							no
A_16_P15551266	2	2p25.1	RRM2	ribonucleotide reductase M2 polypeptide					no							no
A_16_P15551726	2	2p25.1	HPCAL1	hippocalcin-like 1					no							no
A_16_P15552123	2	2p25.1	ODC1	ornithine decarboxylase 1					no							no
A_14_P137638	2	2p25.1	NOL10	nucleolar protein 10					no							no
A_16_P35574403	2	2p25.1	ATP6V1C2	ATPase, H+ transporting, lysosomal 42kDa, V1 subunit C2					no							no
A_16_P15553039	2	2p25.1	PDIA6	protein disulfide isomerase family A, member 6					no							no
A_16_P15553324	2	2p25.1	KCNF1	potassium voltage-gated channel, subfamily F, member 1					no							no
A_16_P00314398	2	2p25.1	FLJ33534	hypothetical LOC285150					no							no
A_16_P00314462	2	2p25.1	PQLC3	PQ loop repeat containing 3					no							no
A_14_P138225	2	2p25.1	ROCK2	Rho-associated, coiled-coil containing protein kinase 2					no							no
A_16_P35576277	2	2p25.1	E2F6	E2F transcription factor 6					no							no
A_16_P35576777	2	2p25.1	GREB1	GREB1 protein					no							no
A_16_P00315296	2	2p25.1	chr2:011768635-011768694	Full-length cDNA clone CS0DJ014YP15 of T cells (Jurkat cell line) Cot 10-normalized of Homo sapiens (human)					no							no
A_16_P15555520	2	2p25.1	LPIN1	lipin 1					no							no
A_16_P00316930	2	2p24.3	TRIB2	tribbles homolog 2 (Drosophila)					no							no
A_14_P112420	2	2p24.3	LOC653602	hypothetical LOC653602					no							no
A_16_P00320161	2	2p24.3	NAG	neuroblastoma-amplified protein					no							no
A_16_P00320826	2	2p24.3	DDX1	DEAD (Asp-Glu-Ala-Asp) box polypeptide 1					no							no
A_14_P138464	2	2p24.3	FAM49A	family with sequence similarity 49, member A					no							no
A_16_P35591193	2	2p24.2	VSNL1	visinin-like 1					no							no
A_14_P134597	2	2p24.2	SMC6	structural maintenance of chromosomes 6					no							no
A_16_P15570022	2	2p24.2	GEN1	Gen homolog 1, endonuclease (Drosophila)					no							no
A_16_P15570352	2	2p24.2	KCNS3	potassium voltage-gated channel, delayed-rectifier, subfamily S, member 3					no							no
A_14_P134088	2	2p24.2	RDH14	retinol dehydrogenase 14 (all-trans/9-cis/11-cis)					no							no
A_16_P15573961	2	2p24.1	OSR1	odd-skipped related 1 (Drosophila)					no							no
A_16_P35597229	2	2p24.1	TTC32	tetratricopeptide repeat domain 32					no							no
A_16_P15575429	2	2p24.1	WDR35	WD repeat domain 35					no							no
A_16_P15575590	2	2p24.1	MATN3	matrilin 3					no							no
A_16_P15575721	2	2p24.1	LAPTM4A	lysosomal-associated protein transmembrane 4 alpha					no							no
A_16_P35598111	2	2p24.1	SDC1	syndecan 1					no							no
A_16_P00327792	2	2p24.1	PUM2	pumilio homolog 2 (Drosophila)					no							no
A_16_P15576780	2	2p24.1	RHOB	ras homolog gene family, member B					no							no
A_16_P00328387	2	2p24.1	HS1BP3	HCLS1 binding protein 3					no							no
A_16_P00328503	2	2p24.1	C2orf43	chromosome 2 open reading frame 43					no							no
A_16_P00332603	2	2p24.1	BC013982	Full length insert cDNA YR39D03					no							no
A_16_P35607166	2	2p24.1	KLHL29	kelch-like 29 (Drosophila)					no							no
A_16_P15585078	2	2p24.1	ATAD2B	ATPase family, AAA domain containing 2B					no							no
A_16_P35607780	2	2p23.3	UBXD4	UBX domain containing 4					no							no
A_16_P00333506	2	2p23.3	FKBP1B	FK506 binding protein 1B, 12.6 kDa					no							no
A_16_P00333524	2	2p23.3	SF3B14	splicing factor 3B, 14 kDa subunit					no							no
A_14_P124347	2	2p23.3	TP53I3	tumor protein p53 inducible protein 3					no							no
A_16_P35608165	2	2p23.3	LOC375190	hypothetical LOC375190					no							no
A_16_P15585970	2	2p23.3	ITSN2	intersectin 2					no							no
A_14_P128411	2	2p23.3	chr2:24719039-24719098	nuclear receptor coactivator 1					no							no
A_16_P00334458	2	2p23.3	LOC391356	similar to CG14903-PA					no							no
A_16_P00334516	2	2p23.3	ADCY3	adenylate cyclase 3					no							no
A_16_P00334699	2	2p23.3	RBJ	rab and DnaJ domain containing					no							no
A_16_P15588217	2	2p23.3	chr2:025291302-025291361	Clone 24841 mRNA sequence					no							no
A_16_P00335090	2	2p23.3	DNMT3A	DNA (cytosine-5-)-methyltransferase 3 alpha					no							no
A_14_P101902	2	2p23.3	DTNB	dystrobrevin, beta					no							no
A_14_P126321	2	2p23.3	ASXL2	additional sex combs like 2 (Drosophila)					no							no
A_16_P15589985	2	2p23.3	KIF3C	kinesin family member 3C					no							no
A_16_P15590193	2	2p23.3	RAB10	RAB10, member RAS oncogene family					no							no
A_16_P35613014	2	2p23.3	HADHA	hydroxyacyl-Coenzyme A dehydrogenase/3-ketoacyl-Coenzyme A thiolase/enoyl-Coenzyme A hydratase (trifunctional protein), alpha subunit					no							no
A_14_P137872	2	2p23.3	HADHB	hydroxyacyl-Coenzyme A dehydrogenase/3-ketoacyl-Coenzyme A thiolase/enoyl-Coenzyme A hydratase (trifunctional protein), beta subunit					no							no
A_16_P35613381	2	2p23.3	SELI	selenoprotein I					no							no
A_16_P15591814	2	2p23.3	KCNK3	potassium channel, subfamily K, member 3					no							no
A_14_P132129	2	2p23.3	C2orf18	chromosome 2 open reading frame 18					no							no
A_14_P111100	2	2p23.3	CENPA	centromere protein A					no							no
A_16_P00337281	2	2p23.3	DPYSL5	dihydropyrimidinase-like 5					no							no
A_16_P15592687	2	2p23.3	FLJ20254	hypothetical protein FLJ20254					no							no
A_14_P106037	2	2p23.3	AGBL5	ATP/GTP binding protein-like 5					no							no
A_16_P00337655	2	2p23.3	FLJ21839	MRNA; cDNA DKFZp586A0722 (from clone DKFZp586A0722)					no							no
A_16_P00337676	2	2p23.3	EMILIN1	elastin microfibril interfacer 1					no							no
A_16_P00337701	2	2p23.3	KHK	ketohexokinase (fructokinase)					no							no
A_14_P100983	2	2p23.3	CGREF1	cell growth regulator with EF-hand domain 1					no							no
A_14_P200056	2	2p23.3	PREB	prolactin regulatory element binding					no							no
A_16_P35615763	2	2p23.3	SLC5A6	solute carrier family 5 (sodium-dependent vitamin transporter), member 6					no							no
A_14_P123347	2	2p23.3	C2orf28	chromosome 2 open reading frame 28					no							no
A_14_P119830	2	2p23.3	CAD	carbamoyl-phosphate synthetase 2, aspartate transcarbamylase, and dihydroorotase					no							no
A_16_P00337925	2	2p23.3	SLC30A3	solute carrier family 30 (zinc transporter), member 3					no							no
A_14_P116140	2	2p23.3	UCN	urocortin					no							no
A_16_P15593444	2	2p23.3	MPV17	MpV17 mitochondrial inner membrane protein					no							no
A_16_P15593480	2	2p23.3	GTF3C2	general transcription factor IIIC, polypeptide 2, beta 110kDa					no							no
A_16_P35616315	2	2p23.3	EIF2B4	eukaryotic translation initiation factor 2B, subunit 4 delta, 67kDa					no							no
A_14_P132711	2	2p23.3	SNX17	sorting nexin 17					no							no
A_14_P108666	2	2p23.3	ZNF513	zinc finger protein 513					no							no
A_14_P110618	2	2p23.3	PPM1G	protein phosphatase 1G (formerly 2C), magnesium-dependent, gamma isoform					no							no
A_14_P133050	2	2p23.3	NRBP1	nuclear receptor binding protein 1					no							no
A_14_P134439	2	2p23.3	KRTCAP3	keratinocyte associated protein 3					no							no
A_16_P00338214	2	2p23.3	IFT172	intraflagellar transport 172 homolog (Chlamydomonas)					no							no
A_14_P128067	2	2p23.3	FNDC4	fibronectin type III domain containing 4					no							no
A_14_P126289	2	2p23.3	ZNF512	zinc finger protein 512					no							no
A_16_P00338460	2	2p23.3	XAB1	XPA binding protein 1, GTPase					no							no
A_14_P100431	2	2p23.3	SUPT7L	suppressor of Ty 7 (S. cerevisiae)-like					no							no
A_14_P109723	2	2p23.3	SLC4A1AP	solute carrier family 4 (anion exchanger), member 1, adaptor protein					no							no
A_16_P00338651	2	2p23.2	MRPL33	mitochondrial ribosomal protein L33					no							no
A_16_P00338681	2	2p23.2	RBKS	ribokinase					no							no
A_16_P00338834	2	2p23.2	BRE	brain and reproductive organ-expressed (TNFRSF1A modulator)					no							no
A_14_P137994	2	2p23.2	FOSL2	FOS-like antigen 2					no							no
A_16_P00340188	2	2p23.2	PPP1CB	protein phosphatase 1, catalytic subunit, beta isoform					no							no
A_16_P35620348	2	2p23.2	FLJ20628	hypothetical protein FLJ20628					no							no
A_16_P15597422	2	2p23.2	WDR43	WD repeat domain 43					no							no
A_16_P15597850	2	2p23.2	LOC165186	similar to RIKEN cDNA 4632412N22 gene					no							no
A_16_P35621258	2	2p23.2	CLIP4	CAP-GLY domain containing linker protein family, member 4					no							no
A_16_P15598221	2	2p23.2	ALK	anaplastic lymphoma kinase (Ki-1)					no							no
A_16_P00342359	2	2p23.1	YPEL5	yippee-like 5 (Drosophila)					no							no
A_16_P00342508	2	2p23.1	LBH	limb bud and heart development homolog (mouse)					no							no
A_16_P15601993	2	2p23.1	LYCAT	lysocardiolipin acyltransferase					no							no
A_16_P00343245	2	2p23.1	CAPN13	calpain 13					no							no
A_14_P124169	2	2p23.1	GALNT14	UDP-N-acetyl-alpha-D-galactosamine:polypeptide N-acetylgalactosaminyltransferase 14 (GalNAc-T14)					no							no
A_16_P00343971	2	2p23.1	CAPN14	calpain 14					no							no
A_16_P00344112	2	2p23.1	EHD3	EH-domain containing 3					no							no
A_16_P15603827	2	2p23.1	XDH	xanthine dehydrogenase					no							no
A_16_P15604669	2	2p22.3	MEMO1	mediator of cell motility 1					no							no
A_16_P15605007	2	2p22.3	DPY30	dpy-30 homolog (C. elegans)					no							no
A_16_P15605096	2	2p22.3	SPAST	spastin					no							no
A_14_P107782	2	2p22.3	SLC30A6	solute carrier family 30 (zinc transporter), member 6					no							no
A_14_P201514	2	2p22.3	YIPF4	Yip1 domain family, member 4					no							no
A_16_P15605675	2	2p22.3	BIRC6	baculoviral IAP repeat-containing 6 (apollon)					no							no
A_16_P00345759	2	2p22.3	TTC27	tetratricopeptide repeat domain 27					no							no
A_16_P15607472	2	2p22.3	LTBP1	latent transforming growth factor beta binding protein 1					no							yes
A_14_P129939	2	2p22.3	RASGRP3	RAS guanyl releasing protein 3 (calcium and DAG-regulated)					no							no
A_16_P00347177	2	2p22.3	FAM98A	family with sequence similarity 98, member A					no							no
A_16_P00350646	2	2p22.2	CRIM1	cysteine rich transmembrane BMP regulator 1 (chordin-like)					no							no
A_14_P109983	2	2p22.2	FEZ2	fasciculation and elongation protein zeta 2 (zygin II)					no							no
A_16_P15615531	2	2p22.2	VIT	vitrin					no							no
A_16_P15616273	2	2p22.2	HEATR5B	HEAT repeat containing 5B					no							no
A_16_P15616603	2	2p22.2	CR603904	---					no							no
A_14_P118626	2	2p22.2	EIF2AK2	eukaryotic translation initiation factor 2-alpha kinase 2					no							no
A_14_P118748	2	2p22.2	CEBPZ	CCAAT/enhancer binding protein zeta					no							no
A_16_P00352023	2	2p22.2	C2orf56	chromosome 2 open reading frame 56					no							no
A_14_P132881	2	2p22.2	PRKD3	protein kinase D3					no							no
A_16_P15617189	2	2p22.2	QPCT	glutaminyl-peptide cyclotransferase (glutaminyl cyclase)					no							no
A_16_P00352608	2	2p22.2	chr2:037775342-037775399	CDNA FLJ31353 fis, clone MESAN2000264					no							no
A_16_P15617897	2	2p22.2	CDC42EP3	CDC42 effector protein (Rho GTPase binding) 3					no							no
A_14_P129814	2	2p22.2	CYP1B1	cytochrome P450, family 1, subfamily B, polypeptide 1					no							no
A_16_P00353566	2	2p22.2	chr2:038423019-038423078	Transcribed locus					no							no
A_14_P120242	2	2p22.2	ARL6IP2	ADP-ribosylation factor-like 6 interacting protein 2					no							no
A_16_P35643778	2	2p22.1	AK098399	CDNA FLJ35303 fis, clone PROST2009571					no							no
A_16_P00353964	2	2p22.1	HNRPLL	heterogeneous nuclear ribonucleoprotein L-like					no							no
A_16_P35644105	2	2p22.1	GALM	Galactose mutarotase (aldose 1-epimerase)					no							no
A_16_P35644288	2	2p22.1	SFRS7	splicing factor, arginine/serine-rich 7, 35kDa					no							no
A_16_P00354263	2	2p22.1	GEMIN6	gem (nuclear organelle) associated protein 6					no							no
A_16_P35644555	2	2p22.1	DHX57	Transcribed locus					no							no
A_16_P15620903	2	2p22.1	MORN2	MORN repeat containing 2					no							no
A_16_P15621183	2	2p22.1	chr2:039114536-039114595	---					no							no
A_16_P15621204	2	2p22.1	SOS1	son of sevenless homolog 1 (Drosophila)					no							no
A_16_P00354936	2	2p22.1	MAP4K3	mitogen-activated protein kinase kinase kinase kinase 3					no							no
A_16_P35646719	2	2p22.1	TMEM178	transmembrane protein 178					no							no
A_16_P35646805	2	2p22.1	THUMPD2	THUMP domain containing 2					no							no
A_16_P15628838	2	2p21	LOC91461	hypothetical protein BC007901					no							yes
A_16_P35652979	2	2p21	EML4	echinoderm microtubule associated protein like 4					no			0.000526478				yes	Gain
A_16_P00359647	2	2p21	COX7A2L	cytochrome c oxidase subunit VIIa polypeptide 2 like					no							yes
A_16_P15630078	2	2p21	MTA3	metastasis associated 1 family, member 3					no							yes
A_16_P00360146	2	2p21	OXER1	oxoeicosanoid (OXE) receptor 1					no							yes
A_14_P132845	2	2p21	HAAO	3-hydroxyanthranilate 3,4-dioxygenase					no							yes
A_16_P00360194	2	2p21	chr2:042932767-042932826	---					no							yes
A_16_P15631625	2	2p21	ZFP36L2	zinc finger protein 36, C3H type-like 2					no							no
A_14_P125566	2	2p21	THADA	thyroid adenoma associated					no							no
A_16_P15632993	2	2p21	chr2:43901165-43901224	pleckstrin homology domain containing, family H (with MyTH4 domain) member 2					no							no
A_16_P15633116	2	2p21	DYNC2LI1	dynein, cytoplasmic 2, light intermediate chain 1					no							no
A_16_P00362058	2	2p21	LRPPRC	leucine-rich PPR-motif containing					no							no
A_16_P00362280	2	2p21	chr2:044295382-044295441	Transcribed locus					no							no
A_14_P115943	2	2p21	PPM1B	protein phosphatase 1B (formerly 2C), magnesium-dependent, beta isoform					no							no
A_16_P00362439	2	2p21	SLC3A1	solute carrier family 3 (cystine, dibasic and neutral amino acid transporters, activator of cystine, dibasic and neutral amino acid transport), member 1					no							no
A_14_P129997	2	2p21	PREPL	prolyl endopeptidase-like					no							no
A_14_P201033	2	2p21	C2orf34	chromosome 2 open reading frame 34					no							no
A_16_P00363416	2	2p21	chr2:045054904-045054963	CDNA FLJ44884 fis, clone BRAMY2037609					no							no
A_14_P120104	2	2p21	SIX3	SIX homeobox 3					no							no
A_16_P00363573	2	2p21	SIX2	SIX homeobox 2					no							no
A_16_P35661266	2	2p21	SRBD1	S1 RNA binding domain 1					no							no
A_14_P202202	2	2p21	PRKCE	protein kinase C, epsilon					no							no
A_16_P00365704	2	2p21	EPAS1	endothelial PAS domain protein 1					no							no
A_16_P00366052	2	2p21	ATP6V1E2	ATPase, H+ transporting, lysosomal 31kDa, V1 subunit E2					no							no
A_14_P121779	2	2p21	RHOQ	ras homolog gene family, member Q					no							no
A_14_P131479	2	2p21	PIGF	phosphatidylinositol glycan anchor biosynthesis, class F					no							no
A_14_P200058	2	2p21	CRIPT	cysteine-rich PDZ-binding protein					no							no
A_16_P15640722	2	2p21	SOCS5	suppressor of cytokine signaling 5					no							no
A_16_P15641119	2	2p21	LOC150837	hypothetical protein LOC150837					no							no
A_16_P00366653	2	2p21	MCFD2	multiple coagulation factor deficiency 2					no							no
A_16_P00366716	2	2p21	TTC7A	tetratricopeptide repeat domain 7A					no							no
A_16_P15641915	2	2p21	CALM2	calmodulin 2 (phosphorylase kinase, delta)					no							no
A_16_P00367343	2	2p21	TACSTD1	tumor-associated calcium signal transducer 1					no							no
A_16_P00367381	2	2p21	MSH2	mutS homolog 2, colon cancer, nonpolyposis type 1 (E. coli)					no							no
A_16_P00367525	2	2p21	KCNK12	potassium channel, subfamily K, member 12					no							no
A_16_P15643246	2	2p16.3	MSH6	mutS homolog 6 (E. coli)					no							no
A_16_P15643362	2	2p16.3	FBXO11	F-box protein 11					no							no
A_16_P15644628	2	2p16.3	CCDC128	coiled-coil domain containing 128					no							no
A_16_P15657324	2	2p16.2	ASB3	ankyrin repeat and SOCS box-containing 3					no							no
A_14_P138313	2	2p16.2	C2orf30	chromosome 2 open reading frame 30					no							no
A_16_P15657719	2	2p16.2	BC110915	Transcribed locus					no							no
A_16_P35682220	2	2p16.2	PSME4	proteasome (prosome, macropain) activator subunit 4					no							no
A_16_P15658358	2	2p16.2	ACYP2	acylphosphatase 2, muscle type					no							no
A_16_P15659392	2	2p16.2	SPTBN1	spectrin, beta, non-erythrocytic 1					no							no
A_16_P15660681	2	2p16.1	chr2:55103509-55103568	similar to echinoderm microtubule associated protein like 5					no							no
A_14_P127375	2	2p16.1	RTN4	reticulon 4					no							no
A_14_P122761	2	2p16.1	C2orf63	chromosome 2 open reading frame 63					no							no
A_14_P121993	2	2p16.1	RPS27A	ribosomal protein S27a					no							no
A_16_P15661354	2	2p16.1	MTIF2	mitochondrial translational initiation factor 2					no							no
A_16_P35686036	2	2p16.1	LOC344405	hypothetical LOC344405					no							no
A_16_P35686069	2	2p16.1	CCDC88A	coiled-coil domain containing 88A					no							no
A_16_P15661993	2	2p16.1	CCDC104	coiled-coil domain containing 104					no							no
A_16_P00379256	2	2p16.1	SMEK2	SMEK homolog 2, suppressor of mek1 (Dictyostelium)					no							no
A_14_P120475	2	2p16.1	PNPT1	polyribonucleotide nucleotidyltransferase 1					no							no
A_16_P15662748	2	2p16.1	EFEMP1	EGF-containing fibulin-like extracellular matrix protein 1					no							no
A_16_P35688864	2	2p16.1	chr2:56522087-56522146	coiled-coil domain containing 85A					no							no
A_16_P15667587	2	2p16.1	VRK2	vaccinia related kinase 2					no							no
A_16_P00382632	2	2p16.1	FANCL	Fanconi anemia, complementation group L					no							no
A_16_P15668626	2	2p16.1	chr2:058628102-058628161	UG0651E06					no							no
A_16_P15674025	2	2p16.1	BCL11A	B-cell CLL/lymphoma 11A (zinc finger protein)					no							no
A_14_P108301	2	2p16.1	PAPOLG	poly(A) polymerase gamma					no							no
A_16_P35700081	2	2p16.1	chr2:061069435-061069494	Transcribed locus					no							no
A_14_P125332	2	2p16.1	PEX13	peroxisome biogenesis factor 13					no							no
A_16_P00387479	2	2p15	LOC339804	hypothetical gene supported by AK075484; BC014578					no							no
A_16_P15675802	2	2p15	AHSA2	AHA1, activator of heat shock 90kDa protein ATPase homolog 2 (yeast)					no							no
A_16_P00387541	2	2p15	USP34	ubiquitin specific peptidase 34					no							no
A_16_P35701408	2	2p15	XPO1	exportin 1 (CRM1 homolog, yeast)					no							no
A_16_P15677142	2	2p15	FLJ13305	Hypothetical protein FLJ13305					no							no
A_16_P15677267	2	2p15	CCT4	chaperonin containing TCP1, subunit 4 (delta)					no							no
A_16_P00388390	2	2p15	COMMD1	copper metabolism (Murr1) domain containing 1					no							no
A_16_P35702972	2	2p15	B3GNT2	UDP-GlcNAc:betaGal beta-1,3-N-acetylglucosaminyltransferase 2					no							no
A_16_P15678508	2	2p15	TMEM17	transmembrane protein 17					no							no
A_16_P35704166	2	2p15	EHBP1	EH domain binding protein 1					no							no
A_16_P00389901	2	2p15	LOC51057	hypothetical protein LOC51057					no							no
A_16_P00390279	2	2p15	MDH1	malate dehydrogenase 1, NAD (soluble)					no							no
A_16_P00390579	2	2p15	FLJ36848	hypothetical LOC647115					no							no
A_16_P00390697	2	2p14	UGP2	UDP-glucose pyrophosphorylase 2					no							no
A_14_P104132	2	2p14	VPS54	vacuolar protein sorting 54 homolog (S. cerevisiae)					no							no
A_16_P15681665	2	2p14	PELI1	pellino homolog 1 (Drosophila)					no							no
A_16_P00391530	2	2p14	HSPC159	galectin-related protein					no							no
A_14_P113196	2	2p14	AFTPH	aftiphilin					no							no
A_16_P15683119	2	2p14	SERTAD2	SERTA domain containing 2					no							no
A_16_P00392353	2	2p14	SLC1A4	solute carrier family 1 (glutamate/neutral amino acid transporter), member 4					no							no
A_16_P00392444	2	2p14	CEP68	centrosomal protein 68kDa					no							no
A_14_P111288	2	2p14	RAB1A	RAB1A, member RAS oncogene family					no							no
A_16_P15684618	2	2p14	ACTR2	ARP2 actin-related protein 2 homolog (yeast)					no							no
A_16_P00392777	2	2p14	SPRED2	sprouty-related, EVH1 domain containing 2					no							no
A_16_P35713363	2	2p14	MEIS1	Meis homeobox 1					no							no
A_16_P00396219	2	2p14	chr2:067531464-067531523	---					no							no
A_14_P116428	2	2p14	C1D	nuclear DNA-binding protein					no							no
A_16_P00397344	2	2p14	WDR92	WD repeat domain 92					no							no
A_14_P123500	2	2p14	PNO1	partner of NOB1 homolog (S. cerevisiae)					no							no
A_16_P35717586	2	2p14	PPP3R1	protein phosphatase 3 (formerly 2B), regulatory subunit B, alpha isoform					no							no
A_16_P35717861	2	2p14	CNRIP1	cannabinoid receptor interacting protein 1					no							no
A_14_P104401	2	2p13.3	PLEK	pleckstrin					no							no
A_16_P00398306	2	2p13.3	ARHGAP25	Rho GTPase activating protein 25					no							no
A_16_P15694580	2	2p13.3	ANTXR1	anthrax toxin receptor 1					no							no
A_16_P35720412	2	2p13.3	chr2:069458492-069458551	Clone 114 tumor rejection antigen					no							no
A_14_P109710	2	2p13.3	GFPT1	glutamine-fructose-6-phosphate transaminase 1					no							no
A_16_P35720634	2	2p13.3	NFU1	NFU1 iron-sulfur cluster scaffold homolog (S. cerevisiae)					no							no
A_16_P15695455	2	2p13.3	AAK1	AP2 associated kinase 1					no							no
A_16_P00399681	2	2p13.3	ANXA4	annexin A4					no							no
A_16_P00399812	2	2p13.3	GMCL1	germ cell-less homolog 1 (Drosophila)					no							no
A_16_P00399901	2	2p13.3	RY1	putative nucleic acid binding protein RY-1					no							no
A_16_P00400007	2	2p13.3	SASP	skin aspartic protease					no							no
A_16_P00400191	2	2p13.3	PCBP1	poly(rC) binding protein 1					no							no
A_16_P00400267	2	2p13.3	C2orf42	chromosome 2 open reading frame 42					no							no
A_16_P15697184	2	2p13.3	TIA1	TIA1 cytotoxic granule-associated RNA binding protein					no							no
A_16_P15697294	2	2p13.3	PCYOX1	prenylcysteine oxidase 1					no							no
A_16_P15697355	2	2p13.3	chr2:070419856-070419915	Transcribed locus					no							no
A_14_P110333	2	2p13.3	SNRPG	small nuclear ribonucleoprotein polypeptide G					no							no
A_16_P35723098	2	2p13.3	TGFA	transforming growth factor, alpha					no							no
A_16_P00400924	2	2p13.3	chr2:070792529-070792588	Clone 23700 mRNA sequence					no							no
A_14_P134316	2	2p13.3	ADD2	adducin 2 (beta)					no							no
A_16_P35724124	2	2p13.3	CLEC4F	C-type lectin domain family 4, member F					no							no
A_16_P35724181	2	2p13.3	CD207	CD207 molecule, langerin					no							no
A_16_P15698858	2	2p13.3	VAX2	ventral anterior homeobox 2					no							no
A_16_P00401424	2	2p13.3	ANKRD53	ankyrin repeat domain 53					no							no
A_14_P106540	2	2p13.3	TEX261	testis expressed 261					no							no
A_16_P15699217	2	2p13.3	NAGK	N-acetylglucosamine kinase					no							no
A_16_P00401522	2	2p13.3	MCEE	methylmalonyl CoA epimerase					no							no
A_16_P35724865	2	2p13.3	MPHOSPH10	M-phase phosphoprotein 10 (U3 small nucleolar ribonucleoprotein)					no							no
A_16_P00401606	2	2p13.3	PAIP2B	poly(A) binding protein interacting protein 2B					no							no
A_16_P15699916	2	2p13.2	ZNF638	zinc finger protein 638					no							no
A_16_P15700035	2	2p13.2	DYSF	dysferlin, limb girdle muscular dystrophy 2B (autosomal recessive)					no							no
A_14_P107131	2	2p13.2	CYP26B1	cytochrome P450, family 26, subfamily B, polypeptide 1					no							no
A_16_P00403038	2	2p13.2	EXOC6B	exocyst complex component 6B					no							no
A_16_P15703368	2	2p13.2	SPR	sepiapterin reductase (7,8-dihydrobiopterin:NADP+ oxidoreductase)					no							no
A_16_P00403994	2	2p13.2	EMX1	empty spiracles homeobox 1					no							no
A_16_P00404048	2	2p13.2	SFXN5	sideroflexin 5					no							no
A_16_P00404234	2	2p13.2	RAB11FIP5	RAB11 family interacting protein 5 (class I)					no							no
A_16_P00404385	2	2p13.2	SMYD5	SMYD family member 5					no							no
A_14_P109385	2	2p13.2	C2orf7	chromosome 2 open reading frame 7					no							no
A_16_P00404436	2	2p13.2	CCT7	chaperonin containing TCP1, subunit 7 (eta)					no							no
A_16_P00404477	2	2p13.2	FBXO41	F-box protein 41					no							no
A_16_P00404527	2	2p13.2	AK125051	---					no							no
A_14_P107301	2	2p13.1	ALMS1	Alstrom syndrome 1					no							no
A_16_P00404944	2	2p13.1	TPRKB	TP53RK binding protein					no							no
A_14_P119716	2	2p13.1	DUSP11	dual specificity phosphatase 11 (RNA/RNP complex 1-interacting)					no							no
A_14_P106056	2	2p13.1	STAMBP	STAM binding protein					no							no
A_16_P35731402	2	2p13.1	ACTG2	actin, gamma 2, smooth muscle, enteric					no							no
A_16_P15705655	2	2p13.1	DGUOK	deoxyguanosine kinase					no							no
A_16_P00405454	2	2p13.1	hCG_40738	hypothetical protein MGC22014					no							no
A_16_P15706203	2	2p13.1	BOLA3	bolA homolog 3 (E. coli)					no							no
A_16_P15706235	2	2p13.1	MOBKL1B	MOB1, Mps One Binder kinase activator-like 1B (yeast)					no							no
A_14_P105184	2	2p13.1	MTHFD2	methylenetetrahydrofolate dehydrogenase (NADP+ dependent) 2, methenyltetrahydrofolate cyclohydrolase					no							no
A_14_P130449	2	2p13.1	DCTN1	dynactin 1 (p150, glued homolog, Drosophila)					no							no
A_16_P35732827	2	2p13.1	LOC388963	similar to short-chain dehydrogenase/reductase 1					no							no
A_16_P00405922	2	2p13.1	WDR54	WD repeat domain 54					no							no
A_16_P35732967	2	2p13.1	ZNHIT4	zinc finger, HIT type 4					no							no
A_14_P116152	2	2p13.1	GCS1	glucosidase I					no							no
A_14_P121793	2	2p13.1	MRPL53	mitochondrial ribosomal protein L53					no							no
A_14_P126021	2	2p13.1	TTC31	tetratricopeptide repeat domain 31					no							no
A_16_P00406049	2	2p13.1	LOC151534	hypothetical protein BC009264					no							no
A_14_P136527	2	2p13.1	PCGF1	polycomb group ring finger 1					no							no
A_16_P15707194	2	2p13.1	DQX1	DEAQ box polypeptide 1 (RNA-dependent ATPase)					no							no
A_14_P107304	2	2p13.1	AUP1	ancient ubiquitous protein 1					no							no
A_14_P113517	2	2p13.1	HTRA2	HtrA serine peptidase 2					no							no
A_16_P00406136	2	2p13.1	DOK1	docking protein 1, 62kDa (downstream of tyrosine kinase 1)					no							no
A_16_P15707515	2	2p13.1	SEMA4F	sema domain, immunoglobulin domain (Ig), transmembrane domain (TM) and short cytoplasmic domain, (semaphorin) 4F					no							no
A_14_P139020	2	2p13.1	HK2	hexokinase 2					no							no
A_16_P00406642	2	2p12	chr2:075066370-075066429	MRNA; cDNA DKFZp762I0915 (from clone DKFZp762I0915)					no							no
A_16_P15708221	2	2p12	POLE4	polymerase (DNA-directed), epsilon 4 (p12 subunit)					no							no
A_16_P35735469	2	2p12	TMEM166	transmembrane protein 166					no							no
A_16_P15709724	2	2p12	MRPL19	mitochondrial ribosomal protein L19					no							no
A_16_P35735899	2	2p12	C2orf3	chromosome 2 open reading frame 3					no							no
A_16_P00419751	2	2p11.2	SUCLG1	succinate-CoA ligase, alpha subunit					no							no
A_16_P00420399	2	2p11.2	TMSB10	thymosin, beta 10					no							no
A_16_P15731230	2	2p11.2	KCMF1	potassium channel modulatory factor 1					no							no
A_16_P00420627	2	2p11.2	TCF7L1	transcription factor 7-like 1 (T-cell specific, HMG-box)					no							no
A_16_P00420938	2	2p11.2	TGOLN2	trans-golgi network protein 2					no							no
A_16_P00420966	2	2p11.2	RETSAT	retinol saturase (all-trans-retinol 13,14-reductase)					no							no
A_16_P15732197	2	2p11.2	RBED1	RNA binding motif and ELMO/CED-12 domain 1					no							no
A_14_P200064	2	2p11.2	CAPG	capping protein (actin filament), gelsolin-like					no							no
A_16_P00421191	2	2p11.2	MAT2A	methionine adenosyltransferase II, alpha					no							no
A_16_P00421210	2	2p11.2	GGCX	gamma-glutamyl carboxylase					no							no
A_16_P15732610	2	2p11.2	VAMP8	vesicle-associated membrane protein 8 (endobrevin)					no							no
A_16_P00421283	2	2p11.2	RNF181	ring finger protein 181					no							no
A_14_P108473	2	2p11.2	TMEM150	transmembrane protein 150					no							no
A_16_P35759160	2	2p11.2	LOC388969	hypothetical LOC388969					no							no
A_16_P00421324	2	2p11.2	USP39	ubiquitin specific peptidase 39					no							no
A_14_P108478	2	2p11.2	SFTPB	surfactant, pulmonary-associated protein B					no							no
A_16_P00421430	2	2p11.2	GNLY	granulysin					no							no
A_16_P15733161	2	2p11.2	ATOH8	atonal homolog 8 (Drosophila)					no							no
A_14_P108034	2	2p11.2	ST3GAL5	ST3 beta-galactoside alpha-2,3-sialyltransferase 5					no							no
A_16_P15733669	2	2p11.2	LOC90784	hypothetical protein LOC90784					no							no
A_14_P111794	2	2p11.2	POLR1A	polymerase (RNA) I polypeptide A, 194kDa					no							no
A_16_P15733997	2	2p11.2	PTCD3	Pentatricopeptide repeat domain 3					no							no
A_14_P110369	2	2p11.2	IMMT	inner membrane protein, mitochondrial (mitofilin)					no							no
A_16_P15734232	2	2p11.2	REEP1	receptor accessory protein 1					no							no
A_16_P15734723	2	2p11.2	JMJD1A	jumonji domain containing 1A					no							no
A_16_P35761490	2	2p11.2	VPS24	vacuolar protein sorting 24 homolog (S. cerevisiae)					no							no
A_16_P15735049	2	2p11.2	RNF103	ring finger protein 103					no							no
A_16_P35761830	2	2p11.2	RMND5A	required for meiotic nuclear division 5 homolog A (S. cerevisiae)					no							no
A_16_P00422868	2	2p11.2	CD8A	CD8a molecule					no							no
A_16_P15735486	2	2p11.2	CD8B	CD8b molecule					no							no
A_16_P35762344	2	2p11.2	chr2:87033744-87033803	WW domain binding protein 1					no							no
A_16_P15737098	2	2p11.2	C2orf59	chromosome 2 open reading frame 59					no							no
A_16_P00423016	2	2p11.2	LOC285074	Hypothetical protein LOC285074					no							no
A_16_P15738329	2	2p11.2	RGPD2	Clone HLS_IMAGE_731119 mRNA sequence					no							no
A_16_P00423054	2	2p11.2	KRCC1	lysine-rich coiled-coil 1					no							no
A_16_P15738678	2	2p11.2	SMYD1	SET and MYND domain containing 1					no							no
A_16_P00423267	2	2p11.2	THNSL2	threonine synthase-like 2 (S. cerevisiae)					no							no
A_14_P128764	2	2p11.2	EIF2AK3	eukaryotic translation initiation factor 2-alpha kinase 3					no							no
A_16_P15739900	2	2p11.2	RPIA	ribose 5-phosphate isomerase A (ribose 5-phosphate epimerase)					no							no
A_16_P00423961	2	2p11.2	FLJ40330	similar to protein immuno-reactive with anti-PTH polyclonal antibodies					no							no
A_16_P00424244	2	2p11.2	IGKC	immunoglobulin kappa constant					no							no
A_16_P00424253	2	2p11.2	HLA-C	Major histocompatibility complex, class I, C					no							no
A_16_P15741334	2	2p11.2	NTN2L	Netrin 2-like (chicken)					no							no
A_16_P00424380	2	2p11.2	IGKV1D-13	immunoglobulin kappa variable 1D-13					no							yes
A_16_P15742487	2	2p11.1	chr2:91092173-91092217	Netrin 2-like (chicken)					no							no
A_16_P00424478	2	2p11.1	LOC654342	Similar to lymphocyte-specific protein 1					no							no
A_16_P15744040	2	2q11.1	ANKRD20B	hypothetical protein LOC90499					no							no
A_16_P15744725	2	2q11.1	MAL	mal, T-cell differentiation protein					no							no
A_16_P00424872	2	2q11.1	MRPS5	mitochondrial ribosomal protein S5					no							no
A_16_P35771867	2	2q11.1	ZNF514	zinc finger protein 514					no							no
A_16_P00424960	2	2q11.1	ZNF2	zinc finger protein 2					no							no
A_16_P35772142	2	2q11.1	PROM2	prominin 2					no							no
A_16_P00425263	2	2q11.1	KCNIP3	Kv channel interacting protein 3, calsenilin					no							no
A_14_P119021	2	2q11.1	FAHD2A	fumarylacetoacetate hydrolase domain containing 2A					no							no
A_16_P00425287	2	2q11.1	LOC285014	hypothetical protein LOC285014					no							no
A_14_P201295	2	2q11.1	chr2:095620801-095620860	Transcribed locus					no							no
A_16_P15746328	2	2q11.1	chr2:095739586-095739645	Homo sapiens, clone IMAGE:4696935, mRNA					no							no
A_16_P00425513	2	2q11.2	LOC150759	hypothetical protein LOC150759					no							no
A_16_P00425548	2	2q11.2	LOC729234	Fumarylacetoacetate hydrolase domain containing 2 pseudogene					no							no
A_16_P00425549	2	2q11.2	LOC150763	hypothetical protein LOC150763					no							yes
A_16_P00425652	2	2q11.2	DUSP2	dual specificity phosphatase 2					no							no
A_16_P35774748	2	2q11.2	STARD7	StAR-related lipid transfer (START) domain containing 7					no							no
A_16_P15747777	2	2q11.2	chr2:096332703-096332762	Transcribed locus					no							no
A_14_P107464	2	2q11.2	TMEM127	transmembrane protein 127					no							no
A_14_P105239	2	2q11.2	CIAO1	cytosolic iron-sulfur protein assembly 1 homolog (S. cerevisiae)					no							no
A_16_P00425811	2	2q11.2	ASCC3L1	activating signal cointegrator 1 complex subunit 3-like 1					no							no
A_16_P00425915	2	2q11.2	NCAPH	non-SMC condensin I complex, subunit H					no							no
A_16_P15748225	2	2q11.2	LINCR	likely ortholog of mouse lung-inducible Neutralized-related C3HC4 RING domain protein					no							no
A_16_P00426089	2	2q11.2	ARID5A	AT rich interactive domain 5A (MRF1-like)					no							no
A_16_P15748588	2	2q11.2	KIAA1310	KIAA1310					no							no
A_16_P15748787	2	2q11.2	LMAN2L	lectin, mannose-binding 2-like					no							no
A_16_P15748875	2	2q11.2	CNNM4	cyclin M4					no							no
A_14_P103346	2	2q11.2	CNNM3	cyclin M3					no							no
A_16_P00426523	2	2q11.2	ANKRD23	ankyrin repeat domain 23					no							yes
A_16_P00426538	2	2q11.2	ANKRD39	ankyrin repeat domain 39					no							yes
A_14_P103368	2	2q11.2	SEMA4C	sema domain, immunoglobulin domain (Ig), transmembrane domain (TM) and short cytoplasmic domain, (semaphorin) 4C					no							yes
A_16_P00426854	2	2q11.2	chr2:097483194-097483253	CDNA clone IMAGE:5217021, with apparent retained intron					no							no
A_16_P00426878	2	2q11.2	COX5B	cytochrome c oxidase subunit Vb					no							no
A_16_P00426894	2	2q11.2	ACTR1B	ARP1 actin-related protein 1 homolog B, centractin beta (yeast)					no							yes
A_16_P35778437	2	2q11.2	LOC728537	hypothetical protein LOC728537					no							yes
A_16_P00426965	2	2q11.2	ZAP70	zeta-chain (TCR) associated protein kinase 70kDa					no							yes
A_16_P00427027	2	2q11.2	TMEM131	transmembrane protein 131					no							yes
A_16_P15752532	2	2q11.2	chr2:098516453-098516512	CDNA FLJ34214 fis, clone FCBBF3021807					no							no
A_16_P35780553	2	2q11.2	C2orf64	chromosome 2 open reading frame 64					no							no
A_16_P00428176	2	2q11.2	UNC50	unc-50 homolog (C. elegans)					no							no
A_16_P15753051	2	2q11.2	MGAT4A	mannosyl (alpha-1,3-)-glycoprotein beta-1,4-N-acetylglucosaminyltransferase, isozyme A					no							no
A_16_P15753410	2	2q11.2	C2orf55	chromosome 2 open reading frame 55					no							no
A_16_P15754087	2	2q11.2	BX647157	Transcribed locus					no							no
A_16_P35781728	2	2q11.2	LIPT1	lipoyltransferase 1					no							no
A_14_P103772	2	2q11.2	MRPL30	mitochondrial ribosomal protein L30					no							no
A_16_P35781964	2	2q11.2	LYG1	lysozyme G-like 1					no							no
A_16_P15754396	2	2q11.2	TXNDC9	thioredoxin domain containing 9					no							no
A_14_P106552	2	2q11.2	EIF5B	eukaryotic translation initiation factor 5B					no							no
A_14_P111196	2	2q11.2	REV1	REV1 homolog (S. cerevisiae)					no							no
A_16_P00429314	2	2q11.2	AFF3	AF4/FMR2 family, member 3					no							no
A_16_P15756853	2	2q11.2	LONRF2	LON peptidase N-terminal domain and ring finger 2					no							no
A_16_P00430565	2	2q11.2	CHST10	carbohydrate sulfotransferase 10					no							no
A_16_P15757478	2	2q11.2	PDCL3	phosducin-like 3					no							no
A_16_P35786341	2	2q11.2	RPL31	ribosomal protein L31					no							no
A_16_P15758680	2	2q11.2	TBC1D8	TBC1 domain family, member 8 (with GRAM domain)					no							no
A_16_P15759097	2	2q11.2	C2orf29	chromosome 2 open reading frame 29					no							no
A_16_P35786959	2	2q11.2	RNF149	ring finger protein 149					no							no
A_16_P15760088	2	2q11.2	MAP4K4	mitogen-activated protein kinase kinase kinase kinase 4					no							no
A_16_P00433070	2	2q11.2	IL1R1	interleukin 1 receptor, type I					no							no
A_16_P00433485	2	2q11.2	IL18RAP	interleukin 18 receptor accessory protein					no							no
A_16_P15767683	2	2q12.1	AK096498	CDNA FLJ39179 fis, clone OCBBF2004147					no							no
A_16_P15767852	2	2q12.1	CR599621	MRNA, clone ICRFp507B0451					no							no
A_16_P00437333	2	2q12.1	MRPS9	mitochondrial ribosomal protein S9					no							no
A_16_P00437668	2	2q12.1	LOC644617	Hypothetical LOC644617					no							no
A_16_P00437695	2	2q12.1	TGFBRAP1	transforming growth factor, beta receptor associated protein 1					no							no
A_16_P00437802	2	2q12.1	C2orf49	chromosome 2 open reading frame 49					no							no
A_16_P35797121	2	2q12.1	FHL2	four and a half LIM domains 2					no							no
A_16_P15770357	2	2q12.2	NCK2	NCK adaptor protein 2					no							no
A_16_P15770886	2	2q12.2	C2orf40	chromosome 2 open reading frame 40					no							no
A_16_P00438939	2	2q12.2	UXS1	UDP-glucuronate decarboxylase 1					no							no
A_16_P35799635	2	2q12.2	PLGLB2	plasminogen-like B2					no							no
A_16_P00439660	2	2q12.2	ST6GAL2	ST6 beta-galactosamide alpha-2,6-sialyltranferase 2					no							no
A_16_P00441559	2	2q12.3	SULT1C2	sulfotransferase family, cytosolic, 1C, member 2					no							no
A_16_P00441796	2	2q12.3	GCC2	CDNA FLJ41714 fis, clone HLUNG2012287					no							no
A_16_P00441879	2	2q12.3	LIMS1	LIM and senescent cell antigen-like domains 1					no							no
A_16_P15776850	2	2q13	RANBP2	RAN binding protein 2					no							no
A_14_P117771	2	2q13	EDAR	ectodysplasin A receptor					no							no
A_16_P00443188	2	2q13	SH3MD4	SH3 multiple domains 4					no							no
A_16_P15778956	2	2q13	40422	septin 10					no							no
A_16_P35807494	2	2q13	ANKRD57	ankyrin repeat domain 57					no							no
A_14_P105532	2	2q13	MALL	mal, T-cell differentiation protein-like					no							no
A_16_P15780463	2	2q13	LOC205251	LOC205251					no							yes
A_16_P00443667	2	2q13	BUB1	BUB1 budding uninhibited by benzimidazoles 1 homolog (yeast)					no							no
A_16_P35810236	2	2q13	chr2:111177576-111177635	CDNA clone IMAGE:5273088					no							no
A_16_P00444341	2	2q13	BCL2L11	BCL2-like 11 (apoptosis facilitator)					no							no
A_16_P15783010	2	2q13	BX647931	Clone HLS_IMAGE_506551 mRNA sequence					no							no
A_16_P00444761	2	2q13	chr2:112222488-112222532	Clone HLS_IMAGE_1534603 mRNA sequence					no							no
A_16_P15784559	2	2q13	ANAPC1	anaphase promoting complex subunit 1					no							no
A_16_P00444799	2	2q13	MERTK	c-mer proto-oncogene tyrosine kinase					no							no
A_16_P35813769	2	2q13	TMEM87B	Full-length cDNA clone CS0DL008YP09 of B cells (Ramos cell line) Cot 25-normalized of Homo sapiens (human)					no							no
A_14_P132794	2	2q13	FBLN7	fibulin 7					no							no
A_16_P15785394	2	2q13	chr2:112682672-112682731	CDNA clone IMAGE:5275753					no							no
A_16_P15785413	2	2q13	ZC3H8	zinc finger CCCH-type containing 8					no							no
A_16_P15785495	2	2q13	ZC3H6	zinc finger CCCH-type containing 6					no							no
A_16_P15785996	2	2q13	BX649154	---					no							no
A_16_P00445502	2	2q13	POLR1B	polymerase (RNA) I polypeptide B, 128kDa					no							no
A_16_P00445545	2	2q13	chr2:113057089-113057148	Transcribed locus, strongly similar to XP_001145544.1 PREDICTED: hypothetical protein [Pan troglodytes]					no							no
A_14_P122010	2	2q13	CHCHD5	coiled-coil-helix-coiled-coil-helix domain containing 5					no							no
A_14_P120649	2	2q13	SLC20A1	solute carrier family 20 (phosphate transporter), member 1					no							no
A_16_P15786619	2	2q13	IL1A	interleukin 1, alpha					no							no
A_16_P35815480	2	2q13	IL1B	interleukin 1, beta					no							no
A_14_P111240	2	2q13	PSD4	pleckstrin and Sec7 domain containing 4					no							no
A_16_P00446413	2	2q13	AK123617	CDNA FLJ41623 fis, clone CTONG3009227					no							no
A_16_P15787711	2	2q13	PAX8	paired box 8					no							no
A_16_P15788228	2	2q13	chr2:113865204-113865263	---					no							no
A_16_P15788653	2	2q14.1	MGC13005	hypothetical protein MGC13005					no							no
A_16_P15788919	2	2q14.1	PS1TP4	HBV preS1-transactivated protein 4					no							no
A_14_P108245	2	2q14.1	SLC35F5	solute carrier family 35, member F5					no							no
A_16_P15789347	2	2q14.1	ACTR3	ARP3 actin-related protein 3 homolog (yeast)					no							no
A_14_P109237	2	2q14.1	chr2:115973298-115973357	dipeptidyl-peptidase 10					no							no
A_16_P15797990	2	2q14.1	DDX18	DEAD (Asp-Glu-Ala-Asp) box polypeptide 18					no							no
A_16_P00452427	2	2q14.1	CCDC93	Transcribed locus					no							no
A_16_P35827668	2	2q14.1	INSIG2	insulin induced gene 2					no							no
A_16_P00453786	2	2q14.2	EN1	engrailed homeobox 1					no							no
A_16_P15800874	2	2q14.2	MARCO	macrophage receptor with collagenous structure					no							no
A_16_P00454305	2	2q14.2	STEAP3	STEAP family member 3					no							no
A_16_P15801742	2	2q14.2	LOC130355	hypothetical protein LOC130355					no							no
A_14_P128275	2	2q14.2	DBI	diazepam binding inhibitor (GABA receptor modulator, acyl-Coenzyme A binding protein)					no							no
A_14_P134466	2	2q14.2	TMEM37	transmembrane protein 37					no							no
A_16_P35831611	2	2q14.2	TMEM177	transmembrane protein 177					no							no
A_16_P00455075	2	2q14.2	PTPN4	protein tyrosine phosphatase, non-receptor type 4 (megakaryocyte)					no							no
A_14_P107183	2	2q14.2	EPB41L5	erythrocyte membrane protein band 4.1 like 5					no							no
A_16_P35832733	2	2q14.2	LOC151146	hypothetical protein LOC151146					no							no
A_16_P15803675	2	2q14.2	TMEM185B	transmembrane protein 185B					no							no
A_16_P00455654	2	2q14.2	RALB	v-ral simian leukemia viral oncogene homolog B (ras related; GTP binding protein)					no							no
A_16_P00455795	2	2q14.2	INHBB	inhibin, beta B					no							no
A_16_P00456538	2	2q14.2	GLI2	GLI-Kruppel family member GLI2					no							no
A_16_P00457208	2	2q14.2	TFCP2L1	Transcription factor CP2-like 1					no							no
A_14_P139373	2	2q14.2	CLASP1	cytoplasmic linker associated protein 1					no							no
A_16_P15807568	2	2q14.3	MKI67IP	MKI67 (FHA domain) interacting nucleolar phosphoprotein					no							no
A_16_P15807598	2	2q14.3	TSN	translin					no							no
A_16_P15818177	2	2q14.3	GYPC	glycophorin C (Gerbich blood group)					no							no
A_16_P00464771	2	2q14.3	BIN1	bridging integrator 1					no							no
A_16_P15819424	2	2q14.3	CYP27C1	cytochrome P450, family 27, subfamily C, polypeptide 1					no							no
A_16_P00465069	2	2q14.3	ERCC3	excision repair cross-complementing rodent repair deficiency, complementation group 3 (xeroderma pigmentosum group B complementing)					no							no
A_16_P35848866	2	2q14.3	AK093893	CDNA FLJ36574 fis, clone TRACH2012376					no							no
A_14_P120523	2	2q14.3	MAP3K2	mitogen-activated protein kinase kinase kinase 2					no							no
A_16_P00465281	2	2q14.3	PROC	protein C (inactivator of coagulation factors Va and VIIIa)					no							no
A_16_P15820011	2	2q14.3	IWS1	IWS1 homolog (S. cerevisiae)					no							no
A_14_P118258	2	2q14.3	LIMS2	LIM and senescent cell antigen-like domains 2					no							no
A_14_P128531	2	2q14.3	SFT2D3	SFT2 domain containing 3					no							no
A_16_P00465866	2	2q14.3	AK095788	CDNA FLJ38469 fis, clone FEBRA2021892					no							no
A_16_P35850221	2	2q14.3	POLR2D	polymerase (RNA) II (DNA directed) polypeptide D					no							no
A_14_P118570	2	2q14.3	AMMECR1L	AMME chromosomal region gene 1-like					no							no
A_16_P00465926	2	2q14.3	MGC4268	CDNA: FLJ22063 fis, clone HEP10326					no							no
A_16_P00465962	2	2q14.3	SAP130	Sin3A-associated protein, 130kDa					no							no
A_16_P00466076	2	2q14.3	UGCGL1	UDP-glucose ceramide glucosyltransferase-like 1					no							no
A_14_P110270	2	2q14.3	HS6ST1	heparan sulfate 6-O-sulfotransferase 1					no							no
A_16_P00468263	2	2q21.1	LOC440905	hypothetical protein LOC440905					no							no
A_16_P35854853	2	2q21.1	SMPD4	sphingomyelin phosphodiesterase 4, neutral membrane (neutral sphingomyelinase-3)					no							yes
A_16_P00468282	2	2q21.1	FAM128B	family with sequence similarity 128, member B					no							yes
A_14_P201557	2	2q21.1	CCDC115	coiled-coil domain containing 115					no							no
A_14_P121790	2	2q21.1	IMP4	IMP4, U3 small nucleolar ribonucleoprotein, homolog (yeast)					no							no
A_16_P00468460	2	2q21.1	PTPN18	protein tyrosine phosphatase, non-receptor type 18 (brain-derived)					no							no
A_16_P15826064	2	2q21.1	chr2:130855766-130855825	Transcribed locus					no							no
A_14_P102106	2	2q21.1	CFC1	cripto, FRL-1, cryptic family 1					no							no
A_16_P00468538	2	2q21.1	FLJ30428	similar to hypothetical protein A230046P18; cDNA sequence BC055759					no							no
A_16_P15827230	2	2q21.1	ARHGEF4	Rho guanine nucleotide exchange factor (GEF) 4					no							no
A_16_P15827631	2	2q21.1	PLEKHB2	pleckstrin homology domain containing, family B (evectins) member 2					no							no
A_16_P35858171	2	2q21.1	TUBA3D	tubulin, alpha 3d					no							no
A_16_P00469213	2	2q21.1	FAM128A	family with sequence similarity 128, member A					no							no
A_16_P15828690	2	2q21.1	CCDC74B	coiled-coil domain containing 74B					no							no
A_16_P00469260	2	2q21.1	FKSG30	kappa-actin					no							no
A_16_P15828937	2	2q21.1	BC036114	CDNA clone IMAGE:5298708					no							no
A_16_P00469301	2	2q21.2	C2orf27	chromosome 2 open reading frame 27					no							no
A_16_P00469912	2	2q21.2	LYPD1	LY6/PLAUR domain containing 1					no							no
A_14_P118510	2	2q21.2	FLJ34870	CDNA FLJ12322 fis, clone MAMMA1002093					no							no
A_16_P15834949	2	2q21.2	chr2:134724135-134724194	Transcribed locus					no							no
A_14_P137466	2	2q21.2	chr2:134786794-134786853	MRNA; cDNA DKFZp586O1318 (from clone DKFZp586O1318)					no							no
A_16_P15835889	2	2q21.3	LOC151162	hypothetical protein LOC151162					no							no
A_14_P107154	2	2q21.3	TMEM163	transmembrane protein 163					no							no
A_16_P15836889	2	2q21.3	CCNT2	cyclin T2					no							no
A_16_P00473561	2	2q21.3	RAB3GAP1	RAB3 GTPase activating protein subunit 1 (catalytic)					no							no
A_16_P00474184	2	2q21.3	R3HDM1	R3H domain containing 1					no							no
A_14_P119643	2	2q21.3	UBXD2	UBX domain containing 2					no							no
A_14_P123379	2	2q21.3	LCT	lactase					no							no
A_16_P15838889	2	2q21.3	MCM6	minichromosome maintenance complex component 6					no							no
A_16_P35868872	2	2q21.3	DARS	aspartyl-tRNA synthetase					no							no
A_16_P15839536	2	2q21.3	CXCR4	chemokine (C-X-C motif) receptor 4					no							no
A_16_P15845410	2	2q22.1	SPOPL	speckle-type POZ protein-like					no							no
A_16_P35879224	2	2q22.1	LRP1B	low density lipoprotein-related protein 1B (deleted in tumors)					no							no
A_16_P15856292	2	2q22.2	KYNU	kynureninase (L-kynurenine hydrolase)					no							no
A_16_P15856861	2	2q22.2	ARHGAP15	Rho GTPase activating protein 15					no							no
A_16_P15859463	2	2q22.3	GTDC1	glycosyltransferase-like domain containing 1					no							no
A_16_P15860613	2	2q22.3	chr2:144961041-144961100	Full length insert cDNA clone YT94E02					no							no
A_16_P15860665	2	2q22.3	ZEB2	zinc finger E-box binding homeobox 2					no							no
A_14_P128551	2	2q22.3	ACVR2A	activin A receptor, type IIA					no							no
A_16_P15870191	2	2q23.1	chr2:148632979-148633038	CDNA FLJ12367 fis, clone MAMMA1002413					no							no
A_16_P15870506	2	2q23.1	chr2:148768519-148768578	Transcribed locus					no							no
A_16_P00494182	2	2q23.1	MBD5	methyl-CpG binding domain protein 5					no							no
A_14_P128292	2	2q23.1	EPC2	enhancer of polycomb homolog 2 (Drosophila)					no							no
A_16_P15872172	2	2q23.1	KIF5C	kinesin family member 5C					no							no
A_14_P118752	2	2q23.2	LOC130576	hypothetical protein LOC130576					no							no
A_16_P35903920	2	2q23.2	LYPD6	LY6/PLAUR domain containing 6					no							no
A_16_P35904100	2	2q23.2	C2orf25	chromosome 2 open reading frame 25					no							no
A_16_P35906221	2	2q23.3	RND3	Rho family GTPase 3					no							no
A_16_P15877958	2	2q23.3	chr2:151926154-151926213	Transcribed locus					no							no
A_16_P35908316	2	2q23.3	NMI	N-myc (and STAT) interactor					no							no
A_16_P00498554	2	2q23.3	TNFAIP6	tumor necrosis factor, alpha-induced protein 6					no							no
A_16_P35908765	2	2q23.3	RIF1	RAP1 interacting factor homolog (yeast)					no							no
A_16_P15878616	2	2q23.3	NEB	nebulin					no							no
A_16_P00499295	2	2q23.3	ARL5A	ADP-ribosylation factor-like 5A					no							no
A_16_P15880343	2	2q23.3	chr2:152791307-152791366	Transcribed locus					no							no
A_16_P35910879	2	2q23.3	STAM2	signal transducing adaptor molecule (SH3 domain and ITAM motif) 2					no							no
A_16_P35912280	2	2q23.3	FMNL2	formin-like 2					no							no
A_16_P00500718	2	2q23.3	PRPF40A	PRP40 pre-mRNA processing factor 40 homolog A (S. cerevisiae)					no							no
A_14_P111261	2	2q23.3	ARL6IP6	ADP-ribosylation-like factor 6 interacting protein 6					no							no
A_16_P15886069	2	2q24.1	KCNJ3	potassium inwardly-rectifying channel, subfamily J, member 3					no							no
A_16_P15889820	2	2q24.1	NR4A2	nuclear receptor subfamily 4, group A, member 2					no							no
A_16_P35920472	2	2q24.1	FLJ46875	hypothetical LOC440918					no							no
A_14_P108888	2	2q24.1	GPD2	glycerol-3-phosphate dehydrogenase 2 (mitochondrial)					no							no
A_16_P00506912	2	2q24.1	GALNT5	UDP-N-acetyl-alpha-D-galactosamine:polypeptide N-acetylgalactosaminyltransferase 5 (GalNAc-T5)					no							no
A_16_P35923094	2	2q24.1	PSCDBP	pleckstrin homology, Sec7 and coiled-coil domains, binding protein					no							no
A_16_P00507335	2	2q24.1	ACVR1C	activin A receptor, type IC					no							no
A_16_P15893178	2	2q24.1	ACVR1	activin A receptor, type I					no							no
A_16_P00508542	2	2q24.1	PKP4	plakophilin 4					no							no
A_16_P15895825	2	2q24.1	DAPL1	death associated protein-like 1					no							no
A_16_P00509632	2	2q24.2	TANC1	tetratricopeptide repeat, ankyrin repeat and coiled-coil containing 1					no							no
A_16_P15896938	2	2q24.2	WDSUB1	WD repeat, sterile alpha motif and U-box domain containing 1					no							no
[truncated: 11,130 more rows]
