# Supplementary material for: High-Resolution Comparative Genomic Hybridization of Inflammatory Breast Cancer and Identification of Candidate Genes
Source: PLoS One. 2011 Feb 9;6(2):e16950. doi: 10.1371/journal.pone.0016950 (PMC3037286; doi:10.1371/journal.pone.0016950)
Supplement: Table S9 — List of 24 genes with gain or amplification correlated with overexpression showing significant frequency differences between IBCs and nIBCs. (XLS) [file pone.0016950.s013.xls]

## Sheet: Table S9
Table S9: List of 24 genes with gain or amplification correlated with overexpression showing significant frequency differences between IBCs and nIBCs
							Gain frequencies			Amplification frequencies				Gain & up-regulation frequencies				Amp & up-regulation frequencies					Correlation Gain & Up (p t.test)	Correlation Amp & Up (p t.test)		Expression IBC vs nIBC (p t.test)
Probe name	Start	Stop	Symbol	Name	Cytoband		%Gain IBC (N=49)	%Gain nIBC (N=124)	Fisher p-value	%Amp IBC (N=49)	%Amp nIBC (N=124)	Fisher p-value		%IBC (N=49)	%nIBC (N=124)	Fisher p value	Associated with	%IBC (N=49)	%nIBC (N=124)	Fisher p value	Associated with
A_14_P200237	33476716	1975126244	RBM13	RNA binding motif protein 13	8p12		0.0612245	0.016129	0.138465	0.0612245	0							0.0612245	0	0.0217252	IBC		0.0907589	0.0486159		0.0154922
A_16_P01971862	95554636	5637723524	RAD54B	RAD54 homolog B (S. cerevisiae)	8q22.1		0.387755	0.201613	0.0190987	0.122449	0.0645161	0.224241		0.387755	0.153226	0.00183524	IBC						2.59165e-06	0.0036039		0.00128259
A_16_P38495594	95633595	5642382105	KIAA1429	Transcribed locus	8q22.1		0.387755	0.201613	0.0190987	0.122449	0.0645161	0.224241		0.122449	0.016129	0.00697295	IBC						0.00068317	0.0262063		0.0464001
A_16_P18402642	95959965	5661637935	INTS8	integrator complex subunit 8	8q22.1		0.408163	0.209677	0.0123729	0.122449	0.0645161	0.224241		0.367347	0.16129	0.00448181	IBC						2.80861e-12	1.02306e-06		0.0319982
A_16_P18413517	100592587	5934962633	VPS13B	vacuolar protein sorting 13 homolog B (yeast)	8q22.2		0.44898	0.225806	0.00508653	0.102041	0.0725806	0.542744		0.408163	0.129032	0.000119471	IBC						0.000156904	0.0368407		8.6715e-08
A_14_P201438	101800174	6006210266	PABPC1	CDNA FLJ25706 fis, clone TST04817	8q22.3		0.44898	0.217742	0.00451414	0.142857	0.0645161	0.131991		0.204082	0.0806452	0.0330494	IBC						0.00702374	0.152605		0.0213412
A_14_P122923	117851748	6953253132	C8orf53/UTP23	chromosome 8 open reading frame 53	8q24.11		0.510204	0.225806	0.0004416	0.22449	0.0645161	0.00527338		0.285714	0.0645161	0.000230692	IBC	0.163265	0.0322581	0.00485834	IBC		9.00608e-10	4.07673e-05		1.52374e-09
A_14_P131099	117954120	6959293080	RAD21	RAD21 homolog (S. pombe)	8q24.11		0.530612	0.225806	0.000211701	0.22449	0.0645161	0.00527338		0.326531	0.112903	0.00155458	IBC	0.163265	0.0564516	0.0349485	IBC		3.66103e-08	6.98634e-05		2.4875e-10
A_14_P103191	120900893	7133152687	TAF2	TAF2 RNA polymerase II, TATA box binding protein (TBP)-associated factor, 150kDa	8q24.12		0.510204	0.233871	0.000888483	0.22449	0.0806452	0.0175157		0.265306	0.112903	0.019177	IBC						2.44954e-10	2.48426e-06		0.014347
A_16_P02008585	120934521	7135136739	DSCC1	defective in sister chromatid cohesion homolog 1 (S. cerevisiae)	8q24.12		0.469388	0.233871	0.00323094	0.204082	0.0806452	0.0330494		0.306122	0.0887097	0.000700491	IBC	0.183673	0.0564516	0.0168273	IBC		7.61451e-06	0.000449031		4.8367e-10
A_14_P100424	121533737	7170490483	MTBP	Mdm2, transformed 3T3 cell double minute 2, p53 binding protein (mouse) binding protein, 104kDa	8q24.12		0.428571	0.225806	0.0141461	0.183673	0.0725806	0.0496853		0.367347	0.137097	0.00135022	IBC	0.183673	0.0725806	0.0496853	IBC		2.04779e-05	0.000477952		1.46576e-06
A_16_P02013426	124231502	7329658618	WDR67	WD repeat domain 67	8q24.13		0.44898	0.233871	0.00898658	0.204082	0.0645161	0.0114339		0.428571	0.169355	0.00067615	IBC	0.204082	0.0483871	0.00293804	IBC		0.000533527	0.00272341		1.09735e-07
A_14_P135739	124473053	7343910127	ATAD2	ATPase family, AAA domain containing 2	8q24.13		0.469388	0.233871	0.00323094	0.22449	0.0645161	0.00527338		0.428571	0.169355	0.00067615	IBC	0.22449	0.0645161	0.00527338	IBC		2.49109e-07	0.000399405		9.67075e-07
A_16_P18474758	125758392	7419745128	MTSS1	Transcribed locus	8q24.13		0.44898	0.241935	0.00995674	0.204082	0.0806452	0.0330494		0.22449	0.0564516	0.00392198	IBC						0.000860724	0.000456444		1.14484e-08
A_16_P18475542	126095542	7439636978	SQLE	squalene epoxidase	8q24.13		0.44898	0.241935	0.00995674	0.204082	0.0806452	0.0330494		0.428571	0.217742	0.00795845	IBC	0.204082	0.0806452	0.0330494	IBC		2.53341e-05	2.27949e-06		1.62018e-09
A_16_P18496353	134644491	7944024969	ST3GAL1	MRNA; cDNA DKFZp547L2215 (from clone DKFZp547L2215)	8q24.22		0.387755	0.209677	0.0210537	0.163265	0.0645161	0.0757995		0.163265	0.0564516	0.0349485	IBC						0.00228357	0.0745722		0.013969
A_16_P19529709	44586790	2630620610	ARID2	AT rich interactive domain 2 (ARID, RFX-like)	12q12		0.0612245	0	0.0217252	0.0204082	0	0.283237		0.0612245	0	0.0217252	IBC						0.341635			0.02884
A_14_P101724	35138973	2073199407	C17orf37	chromosome 17 open reading frame 37	17q12		0.326531	0.185484	0.0677878	0.285714	0.137097	0.0281099		0.306122	0.153226	0.0327176	IBC	0.285714	0.129032	0.0241504	IBC		7.70667e-10			6.99417e-20
A_14_P123434	45803848	2702427032	MRPL27	mitochondrial ribosomal protein L27	17q21.33		0.22449	0.0806452	0.0175157	0.0816327	0.016129	0.0547112		0.0612245	0	0.0217252	IBC	0.0612245	0	0.0217252	IBC		0.00382769			0.0102136
A_14_P115303	45827278	2703809402	LRRC59	leucine rich repeat containing 59	17q21.33		0.204082	0.0806452	0.0330494	0.0816327	0.016129	0.0547112		0.183673	0.0564516	0.0168273	IBC	0.0816327	0.00806452	0.0231317	IBC		6.13648e-05			0.0011833
A_14_P105416	45966329	2712013411	EPN3	epsin 3	17q21.33		0.204082	0.0806452	0.0330494	0.0816327	0.016129	0.0547112		0.204082	0.0645161	0.0114339	IBC						0.00826241			1.43369e-07
A_16_P03257048	46119536	2721052624	ABCC3	ATP-binding cassette, sub-family C (CFTR/MRP), member 3	17q21.33		0.244898	0.0967742	0.0152247	0.102041	0.0241935	0.0419949		0.163265	0.0322581	0.00485834	IBC						0.0861304			0.0172831
A_16_P03272047	57357088	3384068192	INTS2	integrator complex subunit 2	17q23.2		0.244898	0.0967742	0.0152247	0.0408163	0.00806452	0.193678		0.163265	0.0403226	0.00982606	IBC						1.17201e-05			0.0434721
A_16_P20779989	12815654	756123586	PTPN2	protein tyrosine phosphatase, non-receptor type 2	18p11.21		0.0612245	0.016129	0.138465	0.0612245	0	0.0217252						0.0612245	0	0.0217252	IBC		0.00261857			0.0145878
* reference given in main text
